# Supplementary material for: Fragment-Based and Structural Investigation for Discovery of JNK3 Inhibitors
Source: MDPI journal article supplement (doi:10.3390/pharmaceutics14091900), 2022-09-08
Supplement: s1 [file s1]

# Fragment-based and structural investigation for discovery of JNK3 inhibitors

Men Thi Hoai Duong and Hee-Chul Ahn \*

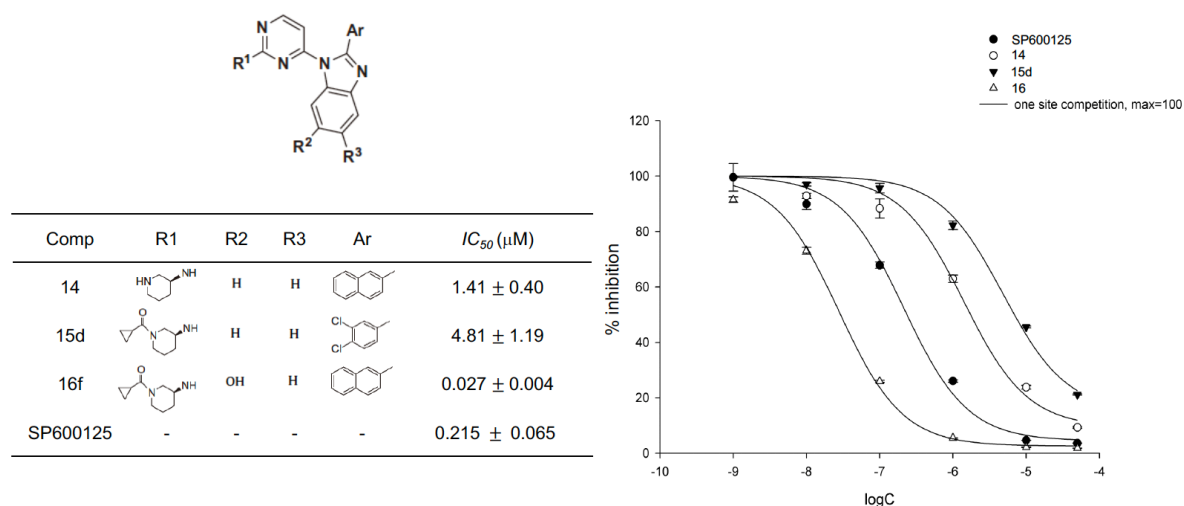

Figure S1. Structures and inhibitory activities of 1-Heteroaryl-2-aryl-1H-benzimidazole derivatives. The numbers of compounds were adapted from the literature [1]. SP600125 is a known JNK inhibitor. The measurements were triplicated and the data were fit to one site competition model in the program SigmaPlot.

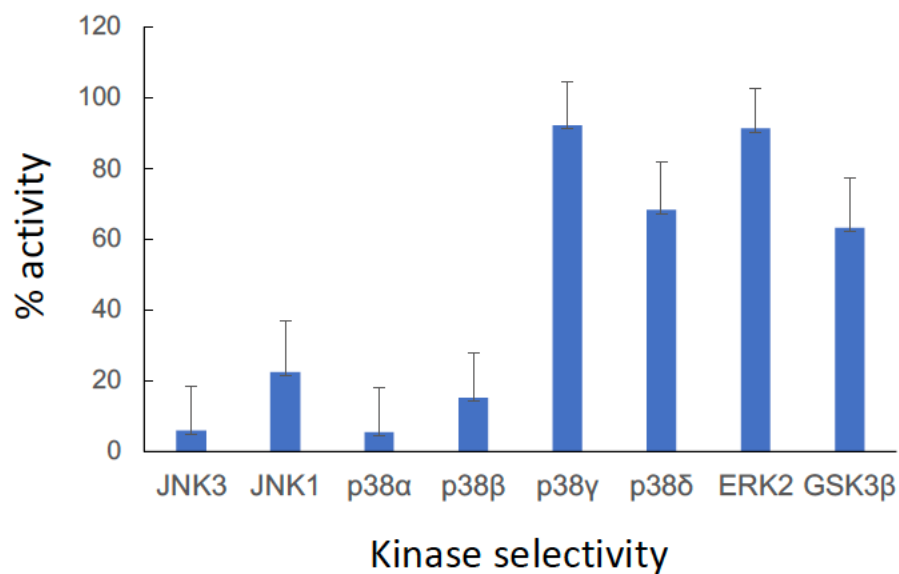

Figure S2. Inhibitory activity of cyclopropyl[(3R)-3-({4-[6-hydroxy-2-(naphthalen-2-yl)-1H-benzimidazol-1-yl]pyrimidin-2-yl}amino)piperidin-1-yl]methanone against various kinases. The kinases were provided by Promega (Madison, WI) and the assay was performed by the method described in the manuscript. All experiments were triplicated.

## Reference

1. Kim, M.H.; Lee, J.; Jung, K.; Kim, M.; Park, Y.J.; Ahn, H.; Kwon, Y.H.; Hah, J.M. Syntheses and biological evaluation of 1-heteroaryl-2-aryl-1H-benzimidazole derivatives as c-Jun N-terminal kinase inhibitors with neuroprotective effects. *Bioorg Med Chem* **2013**, *21*, 2271–2285. <https://doi.org/10.1016/j.bmc.2013.02.021>.
