# Supplementary material for: Fragment-Based and Structural Investigation for Discovery of JNK3 Inhibitors
Source: Pharmaceutics. 2022 Sep 8;14(9):1900. doi: 10.3390/pharmaceutics14091900 (PMC9501523; doi:10.3390/pharmaceutics14091900)
Supplement: Supplementary file 1 [file pharmaceutics-14-01900-s001.zip › S1_list_fragments.xlsx]

## Sheet: PO#KP100817_1
Structure	Index	IDNUMBER	BOX	CELL	WEIGHT	MOL_WEIGHT	STRUCT_FORMULA	VENDOR_LOT	SALTDATA
	229	BAS 01362861	3	D1	10	270.26	C10H10N2O5S	199805
	372	BAS 00119833	4	G12	10	266.21	C10H10N4O5	1491
	120	BAS 00485791	2	B12	10	281.23	C10H11N5O5	155028
	246	BAS 02054454	3	E6	10	249.3	C10H11N5OS	491811
	187	BAS 04303559	2	H7	10	293.31	C10H11N7O2S	412987
	140	BAS 00964784	2	D8	10	252.3	C10H12N4O2S	124783
	215	BAS 01547073	3	B11	10	236.23	C10H12N4O3	267900
	2	BAS 00674021	1	A2	10	284.29	C10H12N4O4S	268985
	19	BAS 00162657	1	B7	10	284.29	C10H12N4O4S	100794
	381	BAS 03013071	4	H9	10	242.3	C10H14N2O3S	565143
	223	BAS 04914674	3	C7	10	270.31	C10H14N4O3S	401475
	137	BAS 01108711	2	D5	10	250.26	C10H14N6O2	270953
	34	BAS 01579163	1	C10	10	266.26	C10H14N6O3	221536
	166	BAS 04879222	2	F10	10	209.25	C10H15N3O2	421719
	253	BAS 06107526	3	F1	10	269.33	C10H15N5O2S	494954
	51	BAS 03302167	1	E3	10	265.25	C10H7N3O4S	53934
	49	BAS 00666414	1	E1	10	273.21	C10H7N7O3	288644
	36	BAS 01121591	1	C12	10	205.24	C10H7NO2S	153493
	81	BAS 00534107	1	G9	10	221.24	C10H7NO3S	39424
	395	BAS 07676575	5	A11	10	220.25	C10H8N2O2S	725320
	404	BAS 05124760	5	B8	10	252.25	C10H8N2O4S	736402
	398	BAS 10157028	5	B2	10	203.2	C10H9N3O2	727205
	489	BAS 10144462	6	A9	10	203.2	C10H9N3O2	601303	HCl
	238	BAS 03148073	3	D10	10	299.26	C10H9N3O6S	469863
	450	BAS 10157016	5	F6	10	202.21	C11H10N2O2	633399	HCl
	135	BAS 02714405	2	D3	10	250.28	C11H10N2O3S	331724
	405	BAS 03802322	5	B9	10	250.28	C11H10N2O3S	736448
	52	BAS 00566627	1	E4	10	282.34	C11H10N2O3S2	112790
	249	BAS 07247905	3	E9	10	266.28	C11H10N2O4S	495967
	480	BAS 05044438	5	H12	10	298.27	C11H10N2O6S	865042
	373	BAS 04080754	4	H1	10	230.23	C11H10N4O2	538744	(COOH)2
	185	BAS 05399607	2	H5	10	262.29	C11H10N4O2S	429311
	18	BAS 00165100	1	B6	10	262.22	C11H10N4O4	175074
	88	BAS 00554245	1	H4	10	254.26	C11H10N8	91943
	123	BAS 00086987	2	C3	10	265.22	C11H11N3O5	48067
	55	BAS 00715781	1	E7	10	245.24	C11H11N5O2	10116
	218	BAS 04900434	3	C2	10	221.21	C11H11NO4	387392
	485	BAS 00187804	6	A5	10	200.24	C11H12N4	706911
	11	BAS 00185645	1	A11	10	232.24	C11H12N4O2	44656
	248	BAS 14914227	3	E8	10	264.31	C11H12N4O2S	495587
	76	BAS 00279727	1	G4	10	296.37	C11H12N4O2S2	47744
	184	BAS 00288287	2	H4	10	296.31	C11H12N4O4S	39559
	69	BAS 03818834	1	F9	10	260.26	C11H12N6O2	324800
	359	BAS 09618069	4	F11	10	299.31	C11H13N3O5S	557165
	380	BAS 09106197	4	H8	10	299.31	C11H13N3O5S	562015
	293	BAS 04239794	4	A5	10	279.32	C11H13N5O2S	530648
	252	BAS 06107492	3	E12	10	263.26	C11H13N5O3	494950
	210	BAS 00316209	3	B6	10	295.32	C11H13N5O3S	136564
	48	BAS 00442510	1	D12	10	263.32	C11H13N5OS	172545
	177	BAS 00873814	2	G9	10	255.29	C11H13NO4S	36321
	354	BAS 01832691	4	F6	10	255.29	C11H13NO4S	556118
	394	BAS 14744483	5	A10	10	255.29	C11H13NO4S	725289
	23	BAS 02788892	1	B11	10	238.31	C11H14N2O2S	262589	HCl
	87	BAS 00162659	1	H3	10	298.32	C11H14N4O4S	151931
	379	BAS 09106187	4	H7	10	285.32	C11H15N3O4S	562011
	38	BAS 01022365	1	D2	10	281.34	C11H15N5O2S	222310
	33	BAS 00552989	1	C9	10	297.34	C11H15N5O3S	116810
	100	BAS 00491926	2	A4	10	297.34	C11H15N5O3S	145208
	195	BAS 00340004	3	A3	10	268.34	C11H16N4O2S	186250
	364	BAS 00380294	4	G4	10	280.29	C11H16N6O3	47139
	173	BAS 03050188	2	G5	10	255.34	C11H17N3O2S	280298	(COOH)2
	435	BAS 13503560	5	E3	10	287.34	C11H17N3O4S	625876
	151	BAS 05022029	2	E7	10	267.29	C11H17N5O3	392490	HBr
	465	BAS 09869164	5	G9	10	267.29	C11H17N5O3	645326
	141	BAS 00964929	2	D9	10	283.29	C11H17N5O4	199626
	456	BAS 12401226	5	F12	10	283.29	C11H17N5O4	624922
	457	BAS 12401512	5	G1	10	283.29	C11H17N5O4	625011
	306	BAS 06989159	4	B6	10	298.37	C11H18N6O2S	506222
	272	BAS 06051420	3	G8	10	276.36	C11H20N2O4S	502002
	486	BAS 00743986	6	A6	10	272.18	C11H7F3N2O3	717555
	144	BAS 00277595	2	D12	10	277.26	C11H7N3O4S	52538
	103	BAS 00069753	2	A7	10	277.19	C11H7N3O6	177356
	29	BAS 00436587	1	C5	10	265.31	C11H7NO3S2	167217
	43	BAS 00386329	1	D7	10	281.2	C11H8FN3O5	79826
	7	BAS 00393632	1	A7	10	232.19	C11H8N2O4	171342
	71	BAS 00140039	1	F11	10	204.18	C11H8O4	39448
	41	BAS 00336309	1	D5	10	284.72	C11H9ClN2O3S	123188
	432	BAS 12772580	5	D12	10	279.28	C11H9N3O4S	615579
	463	BAS 12814409	5	G7	10	291.36	C11H9N5OS2	627426
	487	BAS 01538576	6	A7	10	267.26	C11H9NO5S	495842
	109	BAS 00702460	2	B1	10	283.28	C12H10FNO4S	35351
	469	BAS 10750263	5	H1	10	278.29	C12H10N2O4S	633071
	115	BAS 01235110	2	B7	10	242.24	C12H10N4O2	331034
	273	BAS 06899656	3	G9	10	258.3	C12H10N4OS	500839
	201	BAS 01508376	3	A9	10	234.21	C12H10O5	316216
	266	BAS 07417453	3	G2	10	241.25	C12H11N5O	511341
	433	BAS 10157358	5	E1	10	217.22	C12H11NO3	625572
	397	BAS 01416661	5	B1	10	233.22	C12H11NO4	730213
	67	BAS 00537653	1	F7	10	249.22	C12H11NO5	376840
	261	BAS 06347927	3	F9	10	297.76	C12H12ClN3O2S	507080
	170	BAS 00268888	2	G2	10	296.3	C12H12N10	22005
	207	BAS 00268863	3	B3	10	296.3	C12H12N10	61004
	360	BAS 10157019	4	F12	10	216.24	C12H12N2O2	600031
	451	BAS 10157017	5	F7	10	216.24	C12H12N2O2	633400	HCl
	478	BAS 12541194	5	H10	10	232.24	C12H12N2O3	804846
	14	BAS 03302082	1	B2	10	264.3	C12H12N2O3S	60180
	116	BAS 01550333	2	B8	10	264.3	C12H12N2O3S	225411
	288	BAS 03773241	3	H12	10	264.3	C12H12N2O3S	523423
	83	BAS 02378565	1	G11	10	248.24	C12H12N2O4	266495
	389	BAS 00187800	5	A5	10	244.25	C12H12N4O2	581667
	250	BAS 07045295	3	E10	10	292.32	C12H12N4O3S	489341
	339	BAS 09515822	4	E3	10	272.27	C12H12N6O2	541607
	27	BAS 00417293	1	C3	10	288.27	C12H12N6O3	114810
	368	BAS 01860458	4	G8	10	231.25	C12H13N3O2	262972
	42	BAS 02914412	1	D6	10	263.32	C12H13N3O2S	267197
	172	BAS 03571207	2	G4	10	263.32	C12H13N3O2S	396685
	260	BAS 06347906	3	F8	10	263.32	C12H13N3O2S	507085
	102	BAS 01849468	2	A6	10	279.32	C12H13N3O3S	225530
	8	BAS 00208302	1	A8	10	263.25	C12H13N3O4	121666	HCl
	411	BAS 12915139	5	C3	10	291.33	C12H13N5O2S	605703
	133	BAS 00582817	2	D1	10	291.27	C12H13N5O4	180040
	434	BAS 13030604	5	E2	10	291.27	C12H13N5O4	625599
	361	BAS 00360542	4	G1	10	282.32	C12H14N2O4S	52790
	70	BAS 00620133	1	F10	10	294.33	C12H14N4O3S	172292
	355	BAS 07246362	4	F7	10	201.27	C12H15N3	556140
	314	BAS 00702696	4	C2	10	297.33	C12H15N3O4S	507212
	50	BAS 00654188	1	E2	10	269.32	C12H15NO4S	315273
	374	BAS 06979913	4	H2	10	284.33	C12H16N2O4S	557376
	159	BAS 00531615	2	F3	10	284.27	C12H16N2O6	179643
	107	BAS 00964813	2	A11	10	296.35	C12H16N4O3S	124792
	60	BAS 00318274	1	E12	10	296.28	C12H16N4O5	99362
	317	BAS 05497256	4	C5	10	235.29	C12H17N3O2	532795	2 HCl
	26	BAS 00434923	1	C2	10	267.28	C12H17N3O4	184833
	211	BAS 03041317	3	B7	10	279.3	C12H17N5O3	293382
	377	BAS 09105875	4	H5	10	239.27	C12H17NO4	562751	HCl
	200	BAS 00286895	3	A8	10	282.37	C12H18N4O2S	186226
	367	BAS 00162027	4	G7	10	294.31	C12H18N6O3	48809
	242	BAS 00390217	3	E2	10	281.31	C12H19N5O3	144066
	458	BAS 12401514	5	G2	10	297.31	C12H19N5O4	625013
	382	BAS 10239833	4	H10	10	224.3	C12H20N2O2	565164
	385	BAS 03320465	5	A1	10	256.3	C12H20N2O4	575971
	99	BAS 00398507	2	A3	10	271.24	C12H9N5O3	26222
	259	BAS 07542850	3	F7	10	215.21	C12H9NO3	502365
	171	BAS 00253457	2	G3	10	279.34	C12H9NO3S2	167591
	345	BAS 06342026	4	E9	10	297.3	C13 H12 F N O4 S	538124
	322	BAS 09589675	4	C10	10	249.26	C13 H15 N O4	543603
	127	BAS 00873769	2	C7	10	275.69	C13H10ClN3O2	65099
	222	BAS 00119034	3	C6	10	226.23	C13H10N2O2	65273
	146	BAS 01974958	2	E2	10	290.23	C13H10N2O6	259699
	307	BAS 07416990	4	B7	10	270.32	C13H10N4OS	532659
	68	BAS 00853818	1	F8	10	294.76	C13H11ClN2O2S	98545
	460	BAS 13477094	5	G4	10	274.25	C13H11FN4O2	629762
	292	BAS 00791584	4	A4	10	225.25	C13H11N3O	530641
	427	BAS 13261181	5	D7	10	241.25	C13H11N3O2	614621
	110	BAS 00867832	2	B2	10	289.31	C13H11N3O3S	31701
	233	BAS 01257258	3	D5	10	289.25	C13H11N3O5	198138
	336	BAS 02226396	4	D12	10	269.26	C13H11N5O2	544933
	383	BAS 01083086	4	H11	10	269.26	C13H11N5O2	565194
	281	BAS 07779020	3	H5	10	285.33	C13H11N5OS	508755
	25	BAS 10145594	1	C1	10	245.23	C13H11NO4	1120987
	406	BAS 12773314	5	B10	10	261.25	C13H12FN3O2	736216
	347	BAS 07020379	4	E11	10	228.25	C13H12N2O2	556741
	348	BAS 07020384	4	E12	10	228.25	C13H12N2O2	556768
	410	BAS 02324639	5	C2	10	260.32	C13H12N2O2S	749910
	101	BAS 00536434	2	A5	10	244.25	C13H12N2O3	331778
	66	BAS 04360814	1	F6	10	276.31	C13H12N2O3S	343122
	221	BAS 01398923	3	C5	10	276.31	C13H12N2O3S	379576
	237	BAS 02714403	3	D9	10	276.31	C13H12N2O3S	484400
	186	BAS 04199407	2	H6	10	292.31	C13H12N2O4S	412957
	235	BAS 03576790	3	D7	10	292.31	C13H12N2O4S	462204
	58	BAS 00154355	1	E10	10	276.25	C13H12N2O5	172511
	91	BAS 00732798	1	H7	10	276.25	C13H12N2O5	146033
	362	BAS 00276491	4	G2	10	292.25	C13H12N2O6	85136
	164	BAS 00288266	2	F8	10	288.33	C13H12N4O2S	135918
	167	BAS 01095028	2	F11	10	288.33	C13H12N4O2S	421535
	468	BAS 13778614	5	G12	10	288.33	C13H12N4O2S	648787
	299	BAS 00480624	4	A11	10	288.26	C13H12N4O4	531587
	39	BAS 01127174	1	D3	10	272.33	C13H12N4OS	32869
	296	BAS 03014864	4	A8	10	272.33	C13H12N4OS	506441
	440	BAS 07416268	5	E8	10	272.33	C13H12N4OS	618353
	181	BAS 00673048	2	H1	10	288.4	C13H12N4S2	19595
	422	BAS 12814419	5	D2	10	268.28	C13H12N6O	612724
	488	BAS 01908724	6	A8	10	243.26	C13H13N3O2	365895
	63	BAS 00866927	1	F3	10	259.26	C13H13N3O3	69209
	408	BAS 00187810	5	B12	10	259.26	C13H13N3O3	592276
	315	BAS 07856604	4	C3	10	291.33	C13H13N3O3S	535015
	363	BAS 00161907	4	G3	10	291.33	C13H13N3O3S	40408
	447	BAS 11416768	5	F3	10	291.33	C13H13N3O3S	619437
	365	BAS 00391370	4	G5	10	259.33	C13H13N3OS	101499
	338	BAS 09515806	4	E2	10	271.28	C13H13N5O2	541596
	287	BAS 08978546	3	H11	10	287.28	C13H13N5O3	525458
	426	BAS 10139793	5	D6	10	287.35	C13H13N5OS	614297
	412	BAS 02882510	5	C4	10	215.25	C13H13NO2	606869
	80	BAS 00436688	1	G8	10	295.38	C13H13NO3S2	167033
	366	BAS 00456944	4	G6	10	295.38	C13H13NO3S2	44881
	174	BAS 03149984	2	G6	10	247.25	C13H13NO4	297525
	160	BAS 01416430	2	F4	10	279.31	C13H13NO4S	180867
	198	BAS 00341373	3	A6	10	279.31	C13H13NO4S	57310
	351	BAS 07328991	4	F3	10	263.25	C13H13NO5	550722
	57	BAS 00126095	1	E9	10	295.31	C13H13NO5S	4783
	92	BAS 01215266	1	H8	10	230.27	C13H14N2O2	256576
	234	BAS 00341372	3	D6	10	294.33	C13H14N2O4S	186102
	464	BAS 11797852	5	G8	10	258.28	C13H14N4O2	641598
	262	BAS 06347945	3	F10	10	277.35	C13H15N3O2S	507081
	353	BAS 04913213	4	F5	10	277.35	C13H15N3O2S	553595
	384	BAS 10136136	4	H12	10	277.35	C13H15N3O2S	568436
	455	BAS 03571437	5	F11	10	277.35	C13H15N3O2S	627841
	196	BAS 03433860	3	A4	10	293.35	C13H15N3O3S	419632
	344	BAS 05307901	4	E8	10	293.35	C13H15N3O3S	538085
	85	BAS 00391305	1	H1	10	273.29	C13H15N5O2	190206
	333	BAS 03592766	4	D9	10	273.29	C13H15N5O2	538700
	142	BAS 01183873	2	D10	10	281.4	C13H15NO2S2	54103
	453	BAS 14098326	5	F9	10	249.26	C13H15NO4	646688
	424	BAS 11216022	5	D4	10	264.35	C13H16N2O2S	612942
	428	BAS 12290791	5	D8	10	280.35	C13H16N2O3S	613048
	352	BAS 03240612	4	F4	10	264.28	C13H16N2O4	553458
	402	BAS 05152583	5	B6	10	264.28	C13H16N2O4	736380
	290	BAS 07382082	4	A2	10	276.36	C13H16N4OS	523809
	129	BAS 00862414	2	C9	10	260.36	C13H16N4S	178244
	425	BAS 12524428	5	D5	10	291.31	C13H17N5O3	613560
	224	BAS 03321225	3	C8	10	299.35	C13H17NO5S	463169
	327	BAS 08299950	4	D3	10	283.28	C13H17NO6	542693
	169	BAS 02841647	2	G1	10	266.36	C13H18N2O2S	271076	HCl
	449	BAS 11403139	5	F5	10	266.3	C13H18N2O4	622067
	46	BAS 00318273	1	D10	10	294.31	C13H18N4O4	74593
	189	BAS 00363935	2	H9	10	290.33	C13H18N6O2	32517
	378	BAS 09902343	4	H6	10	253.3	C13H19NO4	562782	HCl
	86	BAS 00316181	1	H2	10	294.36	C13H22N6O2	28006
	286	BAS 17325615	3	H10	10	288.76	C13H9ClN4S	525663
	304	BAS 04297476	4	B4	10	282.22	C13H9F3N2O2	528377
	303	BAS 08311752	4	B3	10	272.31	C13H9FN4S	525164
	436	BAS 06901512	5	E4	10	267.25	C13H9N5O2	618283
	114	BAS 00918380	2	B6	10	299.31	C13H9N5O2S	51462
	357	BAS 07093400	4	F9	10	286.36	C14 H14 N4 O S	547153
	269	BAS 07417503	3	G5	10	288.26	C14H10F2N4O	501082
	271	BAS 07418053	3	G7	10	288.26	C14H10F2N4O	501129
	158	BAS 00430010	2	F2	10	286.24	C14H10N2O5	260306
	390	BAS 03422686	5	A6	10	250.26	C14H10N4O	401347
	415	BAS 11409563	5	C7	10	298.33	C14H10N4O2S	605698
	5	BAS 00318999	1	A5	10	282.26	C14H10N4O3	68213
	6	BAS 00529062	1	A6	10	282.26	C14H10N4O3	34457
	93	BAS 01101682	1	H9	10	286.72	C14H11ClN4O	230189
	329	BAS 08770917	4	D5	10	274.25	C14H11FN2O3	534243
	270	BAS 07417809	3	G6	10	270.27	C14H11FN4O	501104
	168	BAS 00858063	2	F12	10	281.27	C14H11N5O2	73246
	30	BAS 00548736	1	C6	10	272.26	C14H12N2O4	160047
	37	BAS 02082311	1	D1	10	272.26	C14H12N2O4	253099
	157	BAS 24804154	2	F1	10	268.27	C14H12N4O2	980918
	254	BAS 07417130	3	F2	10	268.27	C14H12N4O2	496467
	131	BAS 02072985	2	C11	10	284.27	C14H12N4O3	230120
	474	BAS 14593995	5	H6	10	280.29	C14H12N6O	684064
	209	BAS 00844039	3	B5	10	296.29	C14H12N6O2	67984
	445	BAS 11317676	5	F1	10	272.28	C14H13FN4O	621469
	59	BAS 00881305	1	E11	10	283.29	C14H13N5O2	52208
	104	BAS 00753711	2	A8	10	283.29	C14H13N5O2	30110
	47	BAS 02882126	1	D11	10	243.26	C14H13NO3	272966
	197	BAS 01983546	3	A5	10	259.26	C14H13NO4	359559
	346	BAS 02078374	4	E10	10	275.26	C14H13NO5	556692
	128	BAS 00732855	2	C8	10	295.72	C14H14ClNO4	94186
	194	BAS 00031023	3	A2	10	295.72	C14H14ClNO4	94882
	392	BAS 09842158	5	A8	10	291.28	C14H14FN3O3	595189
	40	BAS 00031021	1	D4	10	279.27	C14H14FNO4	178636
	155	BAS 02078002	2	E11	10	258.28	C14H14N2O3	237061
	473	BAS 09728533	5	H5	10	254.29	C14H14N4O	650519
	205	BAS 03313938	3	B1	10	270.29	C14H14N4O2	401770
	461	BAS 13477106	5	G5	10	270.29	C14H14N4O2	629769
	481	BAS 12680559	6	A1	10	257.29	C14H15N3O2	792393
	441	BAS 12957875	5	E9	10	289.36	C14H15N3O2S	621627
	78	BAS 00866933	1	G6	10	273.29	C14H15N3O3	186331
	217	BAS 01520628	3	C1	10	273.29	C14H15N3O3	225430
	337	BAS 09515802	4	E1	10	285.31	C14H15N5O2	541594
	79	BAS 01416480	1	G7	10	229.28	C14H15NO2	180882	HCl
	180	BAS 00732794	2	G12	10	261.28	C14H15NO4	94465
	182	BAS 03149985	2	H2	10	261.28	C14H15NO4	297527
	191	BAS 00649102	2	H11	10	261.28	C14H15NO4	401602
	277	BAS 07529514	3	H1	10	244.29	C14H16N2O2	521173
	176	BAS 00436646	2	G8	10	292.36	C14H16N2O3S	168695
	263	BAS 07346292	3	F11	10	292.29	C14H16N2O5	506973
	343	BAS 02175825	4	E7	10	291.37	C14H17N3O2S	538110
	386	BAS 10136416	5	A2	10	291.37	C14H17N3O2S	575990
	400	BAS 10136420	5	B4	10	291.37	C14H17N3O2S	736499
	316	BAS 08951486	4	C4	10	275.31	C14H17N3O3	536516
	183	BAS 03152206	2	H3	10	291.31	C14H17N3O4	294228
	310	BAS 07416760	4	B10	10	287.32	C14H17N5O2	532619
	423	BAS 11133176	5	D3	10	278.37	C14H18N2O2S	612869
	12	BAS 01127805	1	A12	10	294.37	C14H18N2O3S	178881	HCl
	45	BAS 01521892	1	D9	10	294.37	C14H18N2O3S	248330
	418	BAS 09877741	5	C10	10	278.31	C14H18N2O4	607168
	312	BAS 03650864	4	B12	10	294.31	C14H18N2O5	548138
	470	BAS 13780231	5	H2	10	277.32	C14H19N3O3	686417
	403	BAS 02806609	5	B7	10	265.31	C14H19NO4	736384
	477	BAS 17336488	5	H9	10	265.31	C14H19NO4	792711
	226	BAS 05514250	3	C10	10	296.39	C14H20N2O3S	438459
	490	BAS 03650862	6	A10	10	280.32	C14H20N2O4	492032
	283	BAS 06111367	3	H7	10	295.4	C14H21N3O2S	496943
	163	BAS 04238281	2	F7	10	259.35	C14H21N5	394552
	73	BAS 00511990	1	G1	10	267.32	C14H21NO4	117238
	431	BAS 09902351	5	D11	10	267.32	C14H21NO4	625145	HCl
	330	BAS 01907455	4	D6	10	268.23	C14H8N2O4	508439
	282	BAS 07418344	3	H6	10	284.25	C14H9FN4O2	501214
	258	BAS 08315329	3	F6	10	266.26	C15H10N2O3	510774
	53	BAS 00804017	1	E5	10	282.25	C15H10N2O4	114540
	17	BAS 00779730	1	B5	10	281.27	C15H11N3O3	61791
	231	BAS 03031768	3	D3	10	281.27	C15H11N3O3	405768
	243	BAS 06901002	3	E3	10	297.27	C15H11N3O4	487708
	244	BAS 06901003	3	E4	10	297.27	C15H11N3O4	487709
	162	BAS 00289345	2	F6	10	289.3	C15H11N7	23167
	175	BAS 00135811	2	G7	10	285.25	C15H11NO5	357700
	22	BAS 00548966	1	B10	10	236.27	C15H12N2O	40166
	106	BAS 01357758	2	A10	10	268.27	C15H12N2O3	178150
	301	BAS 05896243	4	B1	10	268.27	C15H12N2O3	500804
	44	BAS 02065136	1	D8	10	284.27	C15H12N2O4	308010
	240	BAS 00779478	3	D12	10	264.29	C15H12N4O	61789
	275	BAS 06901499	3	G11	10	280.29	C15H12N4O2	500931
	204	BAS 02236317	3	A12	10	296.28	C15H12N4O3	240439
	279	BAS 06901508	3	H3	10	296.28	C15H12N4O3	520526
	342	BAS 07312330	4	E6	10	296.28	C15H12N4O3	540460	HCl
	443	BAS 13776377	5	E11	10	276.3	C15H12N6	622264
	294	BAS 00633606	4	A6	10	272.73	C15H13ClN2O	526928
	268	BAS 07414645	3	G4	10	284.29	C15H13FN4O	516756
	65	BAS 02239008	1	F5	10	283.29	C15H13N3O3	253976
	391	BAS 16984261	5	A7	10	283.35	C15H13N3OS	755103
	98	BAS 00858148	2	A2	10	295.3	C15H13N5O2	70586
	454	BAS 11797837	5	F10	10	271.27	C15H13NO4	623400
	138	BAS 00728706	2	D6	10	287.27	C15H13NO5	235564
	230	BAS 03386980	3	D2	10	254.29	C15H14N2O2	324826
	414	BAS 10853742	5	C6	10	286.35	C15H14N2O2S	606354
	35	BAS 01060138	1	C11	10	270.29	C15H14N2O3	93811
	328	BAS 08770909	4	D4	10	286.29	C15H14N2O4	534238
	308	BAS 07416488	4	B8	10	282.3	C15H14N4O2	532562
	326	BAS 03314076	4	D2	10	282.3	C15H14N4O2	540785
	476	BAS 13778447	5	H8	10	282.3	C15H14N4O2	702058
	89	BAS 02072947	1	H5	10	298.3	C15H14N4O3	230093
	276	BAS 07417187	3	G12	10	298.3	C15H14N4O3	501052
	437	BAS 07414696	5	E5	10	298.3	C15H14N4O3	618309
	74	BAS 01858801	1	G2	10	294.32	C15H14N6O	231299
	24	BAS 00872477	1	B12	10	274.27	C15H14O5	245086
	396	BAS 16159982	5	A12	10	237.3	C15H15N3	730146	2 HCl
	285	BAS 06901395	3	H9	10	281.32	C15H15N5O	520512
	358	BAS 07093405	4	F10	10	281.32	C15H15N5O	547068
	148	BAS 02882177	2	E4	10	257.29	C15H15NO3	272967
	149	BAS 02891938	2	E5	10	257.29	C15H15NO3	272968
	192	BAS 02899630	2	H12	10	257.29	C15H15NO3	413233
	494	BAS 01933158	6	B2	10	257.29	C15H15NO3	244071
	302	BAS 03293479	4	B2	10	273.29	C15H15NO4	525079
	190	BAS 02323351	2	H10	10	289.29	C15H15NO5	387376
	393	BAS 14594365	5	A9	10	240.3	C15H16N2O	704877
	376	BAS 00266582	4	H4	10	272.3	C15H16N2O3	562725
	421	BAS 12814416	5	D1	10	268.32	C15H16N4O	612721
	206	BAS 03313989	3	B2	10	284.32	C15H16N4O2	401801
	472	BAS 09867329	5	H4	10	299.33	C15H17N5O2	691626
	62	BAS 00672331	1	F2	10	243.3	C15H17NO2	176144	HCl
	3	BAS 00554345	1	A3	10	275.3	C15H17NO4	315790
	153	BAS 03149702	2	E9	10	275.3	C15H17NO4	297538
	9	BAS 00313441	1	A9	10	258.32	C15H18N2O2	83493
	256	BAS 07338654	3	F4	10	274.32	C15H18N2O3	497032
	113	BAS 00229901	2	B5	10	286.33	C15H18N4O2	255733	2 Br-
	154	BAS 04913935	2	E10	10	286.33	C15H18N4O2	389423
	475	BAS 13280756	5	H7	10	286.33	C15H18N4O2	699367
	466	BAS 17325073	5	G10	10	286.4	C15H18N4S	751022
	28	BAS 02817829	1	C4	10	293.32	C15H19NO5	331639
	484	BAS 01025073	6	A4	10	293.32	C15H19NO5	571450
	399	BAS 03069477	5	B3	10	260.33	C15H20N2O2	734516	(COOH)2
	369	BAS 03673956	4	G9	10	292.33	C15H20N2O4	401111
	122	BAS 02072975	2	C2	10	288.42	C15H20N4S	230114
	236	BAS 00347621	3	D8	10	259.35	C15H21N3O	302649	2 HCl
	318	BAS 02151918	4	C6	10	295.73	C16H10ClN3O	537103
	340	BAS 02784779	4	E4	10	274.28	C16H10N4O	540552
	319	BAS 01962959	4	C7	10	261.28	C16H11N3O	537033
	112	BAS 03840600	2	B4	10	264.28	C16H12N2O2	359235
	1	BAS 00779637	1	A1	10	280.28	C16H12N2O3	171346
	291	BAS 01052327	4	A3	10	296.28	C16H12N2O4	529100
	439	BAS 07415111	5	E7	10	296.28	C16H12N2O4	618319
	442	BAS 07436277	5	E10	10	295.3	C16H13N3O3	622243
	311	BAS 00853860	4	B11	10	295.36	C16H13N3OS	532189
	335	BAS 02224811	4	D11	10	275.31	C16H13N5	544935
	212	BAS 00370854	3	B8	10	283.28	C16H13NO4	79136
	20	BAS 01121931	1	B8	10	299.28	C16H13NO5	224836
	216	BAS 04198369	3	B12	10	299.28	C16H13NO5	401829
	492	BAS 08909033	6	A12	10	266.3	C16H14N2O2	554802
	21	BAS 00869299	1	B9	10	298.36	C16H14N2O2S	42161
	280	BAS 07093468	3	H4	10	282.3	C16H14N2O3	522614
	284	BAS 05896227	3	H8	10	282.3	C16H14N2O3	500796
	313	BAS 00431904	4	C1	10	278.31	C16H14N4O	529807
	118	BAS 01121979	2	B10	10	270.28	C16H14O4	233332
	108	BAS 00004212	2	A12	10	265.31	C16H15N3O	177016
	126	BAS 03049811	2	C6	10	265.31	C16H15N3O	278637	(COOH)2
	446	BAS 12342220	5	F2	10	265.31	C16H15N3O	617169
	416	BAS 10214948	5	C8	10	281.31	C16H15N3O2	606371
	75	BAS 02026060	1	G3	10	269.3	C16H15NO3	365474
	420	BAS 12519866	5	C12	10	285.3	C16H15NO4	610392
	297	BAS 07033670	4	A9	10	252.32	C16H16N2O	504580
	247	BAS 03662639	3	E7	10	268.31	C16H16N2O2	490813
	117	BAS 00453077	2	B9	10	280.33	C16H16N4O	58001
	462	BAS 07414531	5	G6	10	280.33	C16H16N4O	640995
	125	BAS 02230836	2	C5	10	296.33	C16H16N4O2	252269
	165	BAS 02504629	2	F9	10	296.33	C16H16N4O2	252278
	274	BAS 06900015	3	G10	10	296.33	C16H16N4O2	500861
	289	BAS 06323421	4	A1	10	296.33	C16H16N4O2	523206
	309	BAS 07416740	4	B9	10	296.33	C16H16N4O2	532610
	438	BAS 07414714	5	E6	10	296.33	C16H16N4O2	618314
	430	BAS 12441323	5	D10	10	299.33	C16H17N3O3	611472
	32	BAS 01045023	1	C8	10	295.34	C16H17N5O	2359
	77	BAS 02072957	1	G5	10	295.34	C16H17N5O	230101
	278	BAS 06901396	3	H2	10	295.34	C16H17N5O	520513
	214	BAS 04212413	3	B10	10	271.31	C16H17NO3	394697
	448	BAS 12424045	5	F4	10	271.31	C16H17NO3	619166	HCl
	97	BAS 01031334	2	A1	10	287.31	C16H17NO4	247221
	152	BAS 02236279	2	E8	10	287.31	C16H17NO4	248566
	401	BAS 05236793	5	B5	10	287.31	C16H17NO4	736030	HCl
	255	BAS 07338650	3	F3	10	286.33	C16H18N2O3	497029
	295	BAS 05022434	4	A7	10	285.41	C16H19N3S	527080
	213	BAS 02927089	3	B9	10	289.33	C16H19NO4	268120
	349	BAS 09610858	4	F1	10	289.33	C16H19NO4	552345
	471	BAS 13165690	5	H3	10	272.35	C16H20N2O2	686180
	13	BAS 01369655	1	B1	10	284.36	C16H20N4O	187749
	64	BAS 00224608	1	F4	10	260.33	C16H20O3	69389
	10	BAS 01228893	1	A10	10	276.25	C16H8N2O3	229816
	356	BAS 04302383	4	F8	10	270.29	C17H10N4	546203
	199	BAS 00226981	3	A7	10	293.28	C17H11NO4	152367
	147	BAS 01900533	2	E3	10	292.29	C17H12N2O3	268737
	413	BAS 10853681	5	C5	10	292.29	C17H12N2O3	606384
	341	BAS 02784939	4	E5	10	275.31	C17H13N3O	540577
	332	BAS 06712700	4	D8	10	291.31	C17H13N3O2	538976
	202	BAS 00655167	3	A10	10	279.29	C17H13NO3	56109
	82	BAS 01257277	1	G10	10	278.31	C17H14N2O2	225640
	156	BAS 02927197	2	E12	10	278.31	C17H14N2O2	268136
	150	BAS 00622666	2	E6	10	294.31	C17H14N2O3	318218
	219	BAS 00086864	3	C3	10	294.31	C17H14N2O3	172782
	298	BAS 06989879	4	A10	10	294.31	C17H14N2O3	529207
	228	BAS 00888278	3	C12	10	298.29	C17H14O5	236887
	371	BAS 00331573	4	G11	10	298.32	C17H15FN2O2	61172
	239	BAS 04395183	3	D11	10	281.31	C17H15NO3	482752
	267	BAS 06318894	3	G3	10	297.31	C17H15NO4	509884
	331	BAS 09588619	4	D7	10	297.31	C17H15NO4	543196
	370	BAS 00355103	4	G10	10	297.31	C17H15NO4	33457
	264	BAS 05346789	3	F12	10	280.33	C17H16N2O2	516008
	161	BAS 01357467	2	F5	10	296.32	C17H16N2O3	226789
	305	BAS 01057772	4	B5	10	296.32	C17H16N2O3	534367
	429	BAS 11416481	5	D9	10	279.34	C17H17N3O	613093
	467	BAS 13778601	5	G11	10	295.34	C17H17N3O2	648786
	483	BAS 02791367	6	A3	10	295.34	C17H17N3O2	352022
	111	BAS 00680387	2	B3	10	299.32	C17H17NO4	4572
	387	BAS 02826121	5	A3	10	299.32	C17H17NO4	577202
	417	BAS 13341710	5	C9	10	299.35	C17H18FN3O	608695
	459	BAS 10319642	5	G3	10	266.34	C17H18N2O	638970
	232	BAS 01369683	3	D4	10	294.36	C17H18N4O	394072
	388	BAS 08966875	5	A4	10	294.36	C17H18N4O	743583
	203	BAS 02255502	3	A11	10	297.36	C17H19N3O2	318204
	321	BAS 07802123	4	C9	10	297.36	C17H19N3O2	543769
	350	BAS 08192316	4	F2	10	297.36	C17H19N3O2	544753
	56	BAS 00436328	1	E8	10	288.34	C17H20O4	169522
	482	BAS 13117755	6	A2	10	290.32	C18H14N2O2	640193
	31	BAS 03108620	1	C7	10	294.3	C18H14O4	287446
	300	BAS 00546927	4	A12	10	293.32	C18H15NO3	524221
	491	BAS 01933086	6	A11	10	292.34	C18H16N2O2	240401
	419	BAS 11729748	5	C11	10	296.34	C18H17FN2O	607521
	136	BAS 00484931	2	D4	10	291.35	C18H17N3O	122274
	323	BAS 09589899	4	C11	10	295.34	C18H17NO3	543657
	251	BAS 02618130	3	E11	10	294.35	C18H18N2O2	494234
	145	BAS 00631739	2	E1	10	293.37	C18H19N3O	278496
	493	BAS 02791362	6	B1	10	293.37	C18H19N3O	352016
	265	BAS 00888653	3	G1	10	297.35	C18H19NO3	513092
	324	BAS 09589908	4	C12	10	297.35	C18H19NO3	543667
	325	BAS 09589909	4	D1	10	297.35	C18H19NO3	543668
	15	BAS 01813454	1	B3	10	296.37	C18H20N2O2	283786
	124	BAS 00294932	2	C4	10	296.37	C18H20N2O2	159164
	178	BAS 00004691	2	G10	10	288.3	C19H12O3	12452
	94	BAS 00112454	1	H10	10	289.33	C19H15NO2	191388
	134	BAS 02325558	2	D2	10	293.36	C19H19NO2	247913
	61	BAS 01026752	1	F1	10	296.41	C19H24N2O	321375
	409	BAS 06100949	5	C1	10	226.22	C7H6N4O3S	593688
	188	BAS 00174419	2	H8	10	254.16	C7H6N6O5	55770
	119	BAS 00161966	2	B11	10	225.23	C7H7N5O2S	364821
	193	BAS 00162656	3	A1	10	212.23	C7H8N4O2S	132492
	121	BAS 00450522	2	C1	10	240.25	C7H8N6O2S	237205
	95	BAS 00231905	1	H11	10	224.25	C7H8N6OS	145270
	16	BAS 00162658	1	B4	10	226.26	C8H10N4O2S	32629
	84	BAS 03376594	1	G12	10	257.2	C8H11N5O5	324487
	407	BAS 00119872	5	B11	10	207.19	C8H9N5O2	741970
	179	BAS 00161952	2	G11	10	239.26	C8H9N5O2S	318678
	241	BAS 04379872	3	E1	10	239.26	C8H9N5O2S	488063
	96	BAS 00367076	1	H12	10	174.21	C9H10N4	311469
	208	BAS 00288267	3	B4	10	238.27	C9H10N4O2S	84239
	4	BAS 00162655	1	A4	10	270.27	C9H10N4O4S	55337
	143	BAS 02999245	2	D11	10	234.22	C9H10N6O2	279167
	479	BAS 05307942	5	H11	10	253.28	C9H11N5O2S	864863
	225	BAS 00491852	3	C9	10	269.28	C9H11N5O3S	80650
	132	BAS 10151194	2	C12	10	228.27	C9H12N2O3S	1150779
	130	BAS 00843995	2	C10	10	240.29	C9H12N4O2S	139391
	227	BAS 00964867	3	C11	10	256.28	C9H12N4O3S	124807
	245	BAS 00318871	3	E5	10	240.22	C9H12N4O4	37328
	320	BAS 01981941	4	C8	10	236.23	C9H12N6O2	537054
	375	BAS 05510745	4	H3	10	268.3	C9H12N6O2S	560070
	220	BAS 00286893	3	C4	10	252.23	C9H12N6O3	68700
	72	BAS 00009567	1	F12	10	247.34	C9H13NO3S2	119462
	334	BAS 00666419	4	D10	10	246.19	C9H6N6O3	544445
	105	BAS 00288687	2	A9	10	249.19	C9H7N5O4	146132
	54	BAS 01047518	1	E6	10	281.18	C9H7N5O6	223243
	139	BAS 00779306	2	D7	10	209.22	C9H7NO3S	173429
	90	BAS 00268876	1	H6	10	232.2	C9H8N6O2	147025
	452	BAS 11403062	5	F8	10	207.19	C9H9N3O3	633438
	444	BAS 12960917	5	E12	10	267.27	C9H9N5O3S	621639
	257	BAS 08315150	3	F5	10	227.24	C9H9NO4S	510788

## Sheet: Sheet1
1	1-a-1	1-a-2	1-a-3	1-a-4	1-a-5	1-a-6	1-a-7	1-a-8
2	1-a-9	1-a-10	1-a-11	1-a-12	1-b-1	1-b-2	1-b-3	1-b-4
3	1-b-5	1-b-6	1-b-7	1-b-8	1-b-9	1-b-10	1-b-11	1-b-12
4	1-c-1	1-c-2	1-c-3	1-c-4	1-c-5	1-c-6	1-c-7	1-c-8
5	1-c-9	1-c-10	1-c-11	1-c-12	1-d-1	1-d-2	1-d-3	1-d-4
6	1-d-5	1-d-6	1-d-7	1-d-8	1-d-9	1-d-10	1-d-11	1-d-12
7	1-e-1	1-e-2	1-e-3	1-e-4	1-e-5	1-e-6	1-e-7	1-e-8
8	1-e-9	1-e-10	1-e-11	1-e-12	1-f-1	1-f-2	1-f-3	1-f-4
9	1-f-5	1-f-6	1-f-7	1-f-8	1-f-9	1-f-10	1-f-11	1-f-12
10	1-g-1	1-g-2	1-g-3	1-g-4	1-g-5	1-g-6	1-g-7	1-g-8
11	1-g-9	1-g-10	1-g-11	1-g-12	1-h-1	1-h-2	1-h-3	1-h-4
12	1-h-5	1-h-6	1-h-7	1-h-8	1-h-9	1-h-10	1-h-11	1-h-12
