# Supplementary material for: Fragment-Based and Structural Investigation for Discovery of JNK3 Inhibitors
Source: Pharmaceutics. 2022 Sep 8;14(9):1900. doi: 10.3390/pharmaceutics14091900 (PMC9501523; doi:10.3390/pharmaceutics14091900)
Supplement: Supplementary file 1 [file pharmaceutics-14-01900-s001.zip › S2_SDF_fragments.sdf]

          08231011372D 1   1.00000     0.00000     0

 21 23  0     0  0            999 V2000
    0.1655   -0.0552    0.0000 C   0  0  3  0  0  0           0  0  0
   -0.5414   -0.4759    0.0000 C   0  0  0  0  0  0           0  0  0
    0.1724    0.7724    0.0000 C   0  0  0  0  0  0           0  0  0
    0.8793   -0.4759    0.0000 C   0  0  0  0  0  0           0  0  0
   -0.5414   -1.3000    0.0000 C   0  0  0  0  0  0           0  0  0
   -1.2586   -0.0655    0.0000 C   0  0  0  0  0  0           0  0  0
    0.8828    1.1828    0.0000 C   0  0  0  0  0  0           0  0  0
   -0.5414    1.1828    0.0000 C   0  0  0  0  0  0           0  0  0
    0.8793   -1.2897    0.0000 C   0  0  0  0  0  0           0  0  0
    1.5828   -0.0621    0.0000 C   0  0  0  0  0  0           0  0  0
    0.1655   -1.7034    0.0000 O   0  0  0  0  0  0           0  0  0
   -1.2552   -1.7103    0.0000 C   0  0  0  0  0  0           0  0  0
   -1.9690   -0.4793    0.0000 C   0  0  0  0  0  0           0  0  0
    0.8931    2.0000    0.0000 C   0  0  0  0  0  0           0  0  0
   -0.5414    2.0103    0.0000 C   0  0  0  0  0  0           0  0  0
    1.5931   -1.7034    0.0000 N   0  0  0  0  0  0           0  0  0
    2.2931    0.3448    0.0000 N   0  0  0  0  0  0           0  0  0
   -1.9655   -1.3034    0.0000 C   0  0  0  0  0  0           0  0  0
    0.1793    2.4207    0.0000 C   0  0  0  0  0  0           0  0  0
    1.6034    2.4207    0.0000 O   0  0  0  0  0  0           0  0  0
   -2.6793   -1.7172    0.0000 O   0  0  0  0  0  0           0  0  0
  1  2  1  0     0  0
  1  3  1  0     0  0
  1  4  1  0     0  0
  2  5  2  0     0  0
  2  6  1  0     0  0
  3  7  2  0     0  0
  3  8  1  0     0  0
  4  9  2  0     0  0
  4 10  1  0     0  0
  5 11  1  0     0  0
  5 12  1  0     0  0
  6 13  2  0     0  0
  7 14  1  0     0  0
  8 15  2  0     0  0
  9 16  1  0     0  0
 10 17  3  0     0  0
 12 18  2  0     0  0
 14 19  2  0     0  0
 14 20  1  0     0  0
 18 21  1  0     0  0
  9 11  1  0     0  0
 13 18  1  0     0  0
 15 19  1  0     0  0
M  END
>  <IDNUMBER>
BAS 00779637

>  <BOX>
1

>  <CELL>
A1

>  <WEIGHT>
10.0

>  <MOL_WEIGHT>
280.28

>  <STRUCT_FORMULA>
C16H12N2O3

>  <VENDOR_LOT>
171346

$$$$

          08231011372D 1   1.00000     0.00000     0

 19 21  0     0  0            999 V2000
    0.8310    0.5517    0.0000 N   0  0  3  0  0  0           0  0  0
    0.1552    0.7793    0.0000 C   0  0  0  0  0  0           0  0  0
    0.8310   -1.1966    0.0000 C   0  0  3  0  0  0           0  0  0
    1.2552    1.1310    0.0000 C   0  0  0  0  0  0           0  0  0
    0.1552    1.4897    0.0000 C   0  0  0  0  0  0           0  0  0
   -0.4690    0.4207    0.0000 N   0  0  0  0  0  0           0  0  0
    0.2552   -0.7862    0.0000 O   0  0  0  0  0  0           0  0  0
    0.6034   -1.8862    0.0000 C   0  0  3  0  0  0           0  0  0
    0.8310    1.7138    0.0000 N   0  0  0  0  0  0           0  0  0
   -0.4690    1.8448    0.0000 C   0  0  0  0  0  0           0  0  0
   -1.0828    0.7793    0.0000 C   0  0  0  0  0  0           0  0  0
   -0.3207   -1.1966    0.0000 C   0  0  3  0  0  0           0  0  0
   -0.1069   -1.8862    0.0000 C   0  0  3  0  0  0           0  0  0
    0.6034   -2.4172    0.0000 O   0  0  0  0  0  0           0  0  0
   -1.0828    1.4897    0.0000 N   0  0  0  0  0  0           0  0  0
   -0.4690    2.5586    0.0000 S   0  0  0  0  0  0           0  0  0
   -0.3207   -0.4586    0.0000 C   0  0  0  0  0  0           0  0  0
   -0.1069   -2.4724    0.0000 O   0  0  0  0  0  0           0  0  0
   -1.0828   -0.4586    0.0000 O   0  0  0  0  0  0           0  0  0
  1  2  1  0     0  0
  1  3  1  0     0  0
  1  4  1  0     0  0
  2  5  2  0     0  0
  2  6  1  0     0  0
  3  7  1  0     0  0
  3  8  1  0     0  0
  4  9  2  0     0  0
  5 10  1  0     0  0
  6 11  2  0     0  0
  7 12  1  0     0  0
  8 13  1  0     0  0
  8 14  1  0     0  0
 10 15  2  0     0  0
 10 16  1  0     0  0
 12 17  1  0     0  0
 13 18  1  0     0  0
 17 19  1  0     0  0
  5  9  1  0     0  0
 11 15  1  0     0  0
 12 13  1  0     0  0
M  END
>  <IDNUMBER>
BAS 00674021

>  <BOX>
1

>  <CELL>
A2

>  <WEIGHT>
10.0

>  <MOL_WEIGHT>
284.29

>  <STRUCT_FORMULA>
C10H12N4O4S

>  <VENDOR_LOT>
268985

$$$$

          08231011372D 1   1.00000     0.00000     0

 20 21  0     0  0            999 V2000
    0.7103   -0.7172    0.0000 C   0  0  0  0  0  0           0  0  0
   -0.0034   -1.1379    0.0000 N   0  0  0  0  0  0           0  0  0
    0.7000    0.1103    0.0000 C   0  0  0  0  0  0           0  0  0
    1.4276   -1.1276    0.0000 C   0  0  0  0  0  0           0  0  0
   -0.7241   -0.7241    0.0000 C   0  0  0  0  0  0           0  0  0
    1.4103    0.5207    0.0000 C   0  0  0  0  0  0           0  0  0
    2.1345   -0.7103    0.0000 C   0  0  0  0  0  0           0  0  0
   -1.4345   -1.1276    0.0000 C   0  0  0  0  0  0           0  0  0
   -0.7241    0.1000    0.0000 C   0  0  0  0  0  0           0  0  0
    2.1276    0.1138    0.0000 C   0  0  0  0  0  0           0  0  0
    1.4000    1.3448    0.0000 C   0  0  0  0  0  0           0  0  0
   -2.1414   -0.7241    0.0000 C   0  0  3  0  0  0           0  0  0
   -1.4345    0.5207    0.0000 C   0  0  0  0  0  0           0  0  0
    2.8379    0.5345    0.0000 O   0  0  0  0  0  0           0  0  0
    2.1103    1.7724    0.0000 O   0  0  0  0  0  0           0  0  0
    0.6759    1.7517    0.0000 O   0  0  0  0  0  0           0  0  0
   -2.1414    0.1000    0.0000 C   0  0  0  0  0  0           0  0  0
   -2.5621   -1.4379    0.0000 C   0  0  0  0  0  0           0  0  0
   -2.9414   -0.5034    0.0000 C   0  0  0  0  0  0           0  0  0
   -1.4345    1.3448    0.0000 O   0  0  0  0  0  0           0  0  0
  1  2  1  0     0  0
  1  3  1  0     0  0
  1  4  2  0     0  0
  2  5  1  0     0  0
  3  6  2  0     0  0
  4  7  1  0     0  0
  5  8  1  0     0  0
  5  9  2  0     0  0
  6 10  1  0     0  0
  6 11  1  0     0  0
  8 12  1  0     0  0
  9 13  1  0     0  0
 10 14  1  0     0  0
 11 15  1  0     0  0
 11 16  2  0     0  0
 12 17  1  0     0  0
 12 18  1  0     0  0
 12 19  1  0     0  0
 13 20  2  0     0  0
  7 10  2  0     0  0
 13 17  1  0     0  0
M  END
>  <IDNUMBER>
BAS 00554345

>  <BOX>
1

>  <CELL>
A3

>  <WEIGHT>
10.0

>  <MOL_WEIGHT>
275.30

>  <STRUCT_FORMULA>
C15H17NO4

>  <VENDOR_LOT>
315790

$$$$

          08231011372D 1   1.00000     0.00000     0

 18 19  0     0  0            999 V2000
   -1.0862   -0.4931    0.0000 C   0  0  0  0  0  0           0  0  0
   -1.0862    0.9069    0.0000 C   0  0  0  0  0  0           0  0  0
    0.2586   -0.9241    0.0000 N   0  0  0  0  0  0           0  0  0
   -2.2897   -1.2034    0.0000 N   0  0  3  0  0  0           0  0  0
    0.2586    1.3310    0.0000 N   0  0  3  0  0  0           0  0  0
   -2.2897    1.6103    0.0000 C   0  0  0  0  0  0           0  0  0
    1.0621    0.2103    0.0000 C   0  0  0  0  0  0           0  0  0
   -3.5034   -0.4931    0.0000 C   0  0  0  0  0  0           0  0  0
   -2.2897   -2.6034    0.0000 C   0  0  0  0  0  0           0  0  0
    0.7103    2.6759    0.0000 C   0  0  0  0  0  0           0  0  0
   -3.5034    0.9069    0.0000 N   0  0  0  0  0  0           0  0  0
   -2.2897    3.0103    0.0000 O   0  0  0  0  0  0           0  0  0
    2.4621    0.2241    0.0000 S   0  0  0  0  0  0           0  0  0
   -4.7379   -1.2034    0.0000 O   0  0  0  0  0  0           0  0  0
    3.1621   -0.9897    0.0000 C   0  0  0  0  0  0           0  0  0
    4.5897   -0.9897    0.0000 C   0  0  0  0  0  0           0  0  0
    5.2897   -2.2034    0.0000 O   0  0  0  0  0  0           0  0  0
    5.2897    0.2241    0.0000 O   0  0  0  0  0  0           0  0  0
  1  2  2  0     0  0
  1  3  1  0     0  0
  1  4  1  0     0  0
  2  5  1  0     0  0
  2  6  1  0     0  0
  3  7  2  0     0  0
  4  8  1  0     0  0
  4  9  1  0     0  0
  5 10  1  0     0  0
  6 11  1  0     0  0
  6 12  2  0     0  0
  7 13  1  0     0  0
  8 14  2  0     0  0
 13 15  1  0     0  0
 15 16  1  0     0  0
 16 17  1  0     0  0
 16 18  2  0     0  0
  5  7  1  0     0  0
  8 11  1  0     0  0
M  END
>  <IDNUMBER>
BAS 00162655

>  <BOX>
1

>  <CELL>
A4

>  <WEIGHT>
10.0

>  <MOL_WEIGHT>
270.27

>  <STRUCT_FORMULA>
C9H10N4O4S

>  <VENDOR_LOT>
55337

$$$$

          08231011372D 1   1.00000     0.00000     0

 21 23  0     0  0            999 V2000
    0.6690    0.7379    0.0000 C   0  0  0  0  0  0           0  0  0
    0.4655    0.0069    0.0000 C   0  0  0  0  0  0           0  0  0
    1.4207    0.9379    0.0000 C   0  0  0  0  0  0           0  0  0
    0.1448    1.3069    0.0000 C   0  0  0  0  0  0           0  0  0
   -0.2483   -0.1483    0.0000 C   0  0  0  0  0  0           0  0  0
    0.9931   -0.4966    0.0000 N   0  0  0  0  0  0           0  0  0
    1.9448    0.3759    0.0000 C   0  0  0  0  0  0           0  0  0
    1.6207    1.6552    0.0000 C   0  0  0  0  0  0           0  0  0
    0.3517    2.0517    0.0000 C   0  0  0  0  0  0           0  0  0
   -0.4690   -0.8724    0.0000 C   0  0  0  0  0  0           0  0  0
   -0.8069    0.3517    0.0000 C   0  0  0  0  0  0           0  0  0
    1.7448   -0.3621    0.0000 N   0  0  0  0  0  0           0  0  0
    2.7310    0.5759    0.0000 O   0  0  0  0  0  0           0  0  0
    1.0828    2.2276    0.0000 C   0  0  0  0  0  0           0  0  0
   -1.2310   -1.0724    0.0000 C   0  0  0  0  0  0           0  0  0
   -1.5310    0.1759    0.0000 C   0  0  0  0  0  0           0  0  0
   -1.7552   -0.5103    0.0000 C   0  0  0  0  0  0           0  0  0
   -1.4552   -1.8241    0.0000 N   0  3  0  0  0  0           0  0  0
   -2.5552   -0.6966    0.0000 N   0  0  0  0  0  0           0  0  0
   -0.9069   -2.4241    0.0000 O   0  0  0  0  0  0           0  0  0
   -2.2069   -1.9966    0.0000 O   0  5  0  0  0  0           0  0  0
  1  2  1  0     0  0
  1  3  2  0     0  0
  1  4  1  0     0  0
  2  5  1  0     0  0
  2  6  2  0     0  0
  3  7  1  0     0  0
  3  8  1  0     0  0
  4  9  2  0     0  0
  5 10  2  0     0  0
  5 11  1  0     0  0
  6 12  1  0     0  0
  7 13  2  0     0  0
  8 14  2  0     0  0
 10 15  1  0     0  0
 11 16  2  0     0  0
 15 17  2  0     0  0
 15 18  1  0     0  0
 17 19  1  0     0  0
 18 20  2  0     0  0
 18 21  1  0     0  0
  7 12  1  0     0  0
  9 14  1  0     0  0
 16 17  1  0     0  0
M  CHG  2  18   1  21  -1
M  END
>  <IDNUMBER>
BAS 00318999

>  <BOX>
1

>  <CELL>
A5

>  <WEIGHT>
10.0

>  <MOL_WEIGHT>
282.26

>  <STRUCT_FORMULA>
C14H10N4O3

>  <VENDOR_LOT>
68213

$$$$

          08231011372D 1   1.00000     0.00000     0

 21 23  0     0  0            999 V2000
    1.5276    0.8690    0.0000 C   0  0  0  0  0  0           0  0  0
    1.5276    0.1690    0.0000 C   0  0  0  0  0  0           0  0  0
    0.9207    1.2172    0.0000 C   0  0  0  0  0  0           0  0  0
    2.7379    0.8690    0.0000 C   0  0  0  0  0  0           0  0  0
    0.9207   -0.1724    0.0000 C   0  0  0  0  0  0           0  0  0
    2.1345   -0.1724    0.0000 N   0  0  0  0  0  0           0  0  0
    0.3276    0.8690    0.0000 C   0  0  0  0  0  0           0  0  0
    2.7379    0.1690    0.0000 N   0  0  0  0  0  0           0  0  0
    0.3276    0.1690    0.0000 C   0  0  0  0  0  0           0  0  0
   -0.3034    1.2586    0.0000 N   0  0  0  0  0  0           0  0  0
   -1.0276    1.0793    0.0000 C   0  0  0  0  0  0           0  0  0
   -1.2379    0.3552    0.0000 C   0  0  0  0  0  0           0  0  0
   -0.7138   -0.1828    0.0000 C   0  0  0  0  0  0           0  0  0
   -1.9621    0.1793    0.0000 C   0  0  0  0  0  0           0  0  0
   -0.9241   -0.9034    0.0000 C   0  0  0  0  0  0           0  0  0
   -2.1724   -0.5448    0.0000 C   0  0  0  0  0  0           0  0  0
   -2.4862    0.7172    0.0000 O   0  0  0  0  0  0           0  0  0
   -1.6483   -1.0828    0.0000 C   0  0  0  0  0  0           0  0  0
   -0.4000   -1.4448    0.0000 N   0  3  0  0  0  0           0  0  0
    0.3276   -1.2586    0.0000 O   0  0  0  0  0  0           0  0  0
   -0.6103   -2.1586    0.0000 O   0  5  0  0  0  0           0  0  0
  1  2  2  0     0  0
  1  3  1  0     0  0
  1  4  1  0     0  0
  2  5  1  0     0  0
  2  6  1  0     0  0
  3  7  2  0     0  0
  4  8  2  0     0  0
  5  9  2  0     0  0
  7 10  1  0     0  0
 10 11  2  0     0  0
 11 12  1  0     0  0
 12 13  2  0     0  0
 12 14  1  0     0  0
 13 15  1  0     0  0
 14 16  2  0     0  0
 14 17  1  0     0  0
 15 18  2  0     0  0
 15 19  1  0     0  0
 19 20  2  0     0  0
 19 21  1  0     0  0
  6  8  1  0     0  0
  7  9  1  0     0  0
 16 18  1  0     0  0
M  CHG  2  19   1  21  -1
M  END
>  <IDNUMBER>
BAS 00529062

>  <BOX>
1

>  <CELL>
A6

>  <WEIGHT>
10.0

>  <MOL_WEIGHT>
282.26

>  <STRUCT_FORMULA>
C14H10N4O3

>  <VENDOR_LOT>
34457

$$$$

          08231011372D 1   1.00000     0.00000     0

 17 18  0     0  0            999 V2000
    0.5586    0.3552    0.0000 C   0  0  0  0  0  0           0  0  0
   -0.0793    0.7172    0.0000 C   0  0  0  0  0  0           0  0  0
    0.5586   -0.3690    0.0000 C   0  0  0  0  0  0           0  0  0
    1.1724    0.7034    0.0000 C   0  0  0  0  0  0           0  0  0
   -0.6966    0.3655    0.0000 C   0  0  0  0  0  0           0  0  0
    1.1724   -0.7276    0.0000 N   0  0  0  0  0  0           0  0  0
   -0.0793   -0.7448    0.0000 O   0  0  0  0  0  0           0  0  0
    1.7966    0.3552    0.0000 N   0  0  0  0  0  0           0  0  0
    1.1724    1.4172    0.0000 O   0  0  0  0  0  0           0  0  0
   -1.3069    0.7414    0.0000 C   0  0  0  0  0  0           0  0  0
   -0.6966   -0.3552    0.0000 C   0  0  0  0  0  0           0  0  0
    1.7966   -0.3690    0.0000 C   0  0  0  0  0  0           0  0  0
   -1.9414    0.3793    0.0000 C   0  0  0  0  0  0           0  0  0
   -1.3276   -0.7069    0.0000 C   0  0  0  0  0  0           0  0  0
    2.4310   -0.7345    0.0000 O   0  0  0  0  0  0           0  0  0
   -1.9517   -0.3345    0.0000 C   0  0  0  0  0  0           0  0  0
   -2.5793   -0.6966    0.0000 O   0  0  0  0  0  0           0  0  0
  1  2  2  0     0  0
  1  3  1  0     0  0
  1  4  1  0     0  0
  2  5  1  0     0  0
  3  6  1  0     0  0
  3  7  2  0     0  0
  4  8  1  0     0  0
  4  9  2  0     0  0
  5 10  1  0     0  0
  5 11  2  0     0  0
  6 12  1  0     0  0
 10 13  2  0     0  0
 11 14  1  0     0  0
 12 15  2  0     0  0
 13 16  1  0     0  0
 16 17  1  0     0  0
  8 12  1  0     0  0
 14 16  2  0     0  0
M  END
>  <IDNUMBER>
BAS 00393632

>  <BOX>
1

>  <CELL>
A7

>  <WEIGHT>
10.0

>  <MOL_WEIGHT>
232.19

>  <STRUCT_FORMULA>
C11H8N2O4

>  <VENDOR_LOT>
171342

$$$$

          08231011372D 1   1.00000     0.00000     0

 19 20  0     0  0            999 V2000
   -2.5724    1.7310    0.0000 N   0  0  3  0  0  0           0  0  0
   -4.1621    2.6724    0.0000 C   0  0  0  0  0  0           0  0  0
   -2.5724   -0.1069    0.0000 C   0  0  0  0  0  0           0  0  0
   -0.9621    2.6724    0.0000 C   0  0  0  0  0  0           0  0  0
   -4.1621    4.5103    0.0000 N   0  0  0  0  0  0           0  0  0
   -5.7621    1.7586    0.0000 C   0  0  0  0  0  0           0  0  0
   -0.9621   -1.0448    0.0000 C   0  0  0  0  0  0           0  0  0
   -0.9621    4.5103    0.0000 C   0  0  0  0  0  0           0  0  0
   -5.7621   -0.0897    0.0000 O   0  0  0  0  0  0           0  0  0
    0.6241   -0.1069    0.0000 C   0  0  0  0  0  0           0  0  0
   -0.9621   -2.9207    0.0000 C   0  0  0  0  0  0           0  0  0
    2.3103   -1.0069    0.0000 C   0  0  0  0  0  0           0  0  0
    0.6517   -3.8931    0.0000 C   0  0  0  0  0  0           0  0  0
    2.3103   -2.8897    0.0000 C   0  0  0  0  0  0           0  0  0
    3.8897   -0.0414    0.0000 N   0  3  0  0  0  0           0  0  0
    3.9724   -3.8276    0.0000 O   0  0  0  0  0  0           0  0  0
    5.5759   -0.9448    0.0000 O   0  0  0  0  0  0           0  0  0
    3.8897    1.8310    0.0000 O   0  5  0  0  0  0           0  0  0
    5.6103   -2.8207    0.0000 C   0  0  0  0  0  0           0  0  0
  1  2  1  0     0  0
  1  3  1  0     0  0
  1  4  1  0     0  0
  2  5  2  0     0  0
  2  6  1  0     0  0
  3  7  1  0     0  0
  4  8  2  0     0  0
  6  9  1  0     0  0
  7 10  1  0     0  0
  7 11  2  0     0  0
 10 12  2  0     0  0
 11 13  1  0     0  0
 12 14  1  0     0  0
 12 15  1  0     0  0
 14 16  1  0     0  0
 15 17  2  0     0  0
 15 18  1  0     0  0
 16 19  1  0     0  0
  5  8  1  0     0  0
 13 14  2  0     0  0
M  CHG  2  15   1  18  -1
M  END
>  <IDNUMBER>
BAS 00208302

>  <SALTDATA>
HCl

>  <BOX>
1

>  <CELL>
A8

>  <WEIGHT>
10.0

>  <MOL_WEIGHT>
263.25

>  <STRUCT_FORMULA>
C12H13N3O4

>  <VENDOR_LOT>
121666

$$$$

          08231011372D 1   1.00000     0.00000     0

 19 20  0     0  0            999 V2000
   -1.1586    0.4103    0.0000 C   0  0  0  0  0  0           0  0  0
   -1.1586    1.6793    0.0000 C   0  0  0  0  0  0           0  0  0
   -2.2517   -0.2276    0.0000 C   0  0  0  0  0  0           0  0  0
   -0.0379   -0.2276    0.0000 N   0  0  0  0  0  0           0  0  0
   -2.2517    2.3310    0.0000 C   0  0  3  0  0  0           0  0  0
   -3.3586    0.4103    0.0000 C   0  0  0  0  0  0           0  0  0
   -0.0379   -1.5276    0.0000 N   0  0  0  0  0  0           0  0  0
   -3.3586    1.6793    0.0000 C   0  0  0  0  0  0           0  0  0
   -2.7000    3.5310    0.0000 C   0  0  0  0  0  0           0  0  0
   -1.0517    2.7724    0.0000 C   0  0  0  0  0  0           0  0  0
   -4.4828   -0.2586    0.0000 O   0  0  0  0  0  0           0  0  0
    1.0483   -2.1448    0.0000 C   0  0  0  0  0  0           0  0  0
    2.1793   -1.4793    0.0000 C   0  0  0  0  0  0           0  0  0
    1.0655   -3.4414    0.0000 O   0  0  0  0  0  0           0  0  0
    3.3000   -2.1069    0.0000 C   0  0  0  0  0  0           0  0  0
    2.1793   -0.1897    0.0000 C   0  0  0  0  0  0           0  0  0
    4.3897   -1.4793    0.0000 C   0  0  0  0  0  0           0  0  0
    3.3000    0.4586    0.0000 C   0  0  0  0  0  0           0  0  0
    4.3897   -0.1897    0.0000 C   0  0  0  0  0  0           0  0  0
  1  2  1  0     0  0
  1  3  1  0     0  0
  1  4  2  0     0  0
  2  5  1  0     0  0
  3  6  1  0     0  0
  4  7  1  0     0  0
  5  8  1  0     0  0
  5  9  1  0     0  0
  5 10  1  0     0  0
  6 11  2  0     0  0
  7 12  1  0     0  0
 12 13  1  0     0  0
 12 14  2  0     0  0
 13 15  2  0     0  0
 13 16  1  0     0  0
 15 17  1  0     0  0
 16 18  2  0     0  0
 17 19  2  0     0  0
  6  8  1  0     0  0
 18 19  1  0     0  0
M  END
>  <IDNUMBER>
BAS 00313441

>  <BOX>
1

>  <CELL>
A9

>  <WEIGHT>
10.0

>  <MOL_WEIGHT>
258.32

>  <STRUCT_FORMULA>
C15H18N2O2

>  <VENDOR_LOT>
83493

$$$$

          08231011372D 1   1.00000     0.00000     0

 21 24  0     0  0            999 V2000
   -0.5448    0.4034    0.0000 C   0  0  0  0  0  0           0  0  0
   -0.5552   -0.4345    0.0000 C   0  0  0  0  0  0           0  0  0
   -1.9931    0.4034    0.0000 C   0  0  0  0  0  0           0  0  0
    0.1690    0.8172    0.0000 N   0  0  0  0  0  0           0  0  0
   -1.2724   -0.8448    0.0000 C   0  0  0  0  0  0           0  0  0
    0.1690   -0.8552    0.0000 N   0  0  0  0  0  0           0  0  0
   -1.9931   -0.4345    0.0000 C   0  0  0  0  0  0           0  0  0
   -2.7034    0.8172    0.0000 C   0  0  0  0  0  0           0  0  0
    0.8966    0.3966    0.0000 C   0  0  0  0  0  0           0  0  0
   -1.2724   -1.6724    0.0000 O   0  0  0  0  0  0           0  0  0
    0.8897   -0.4345    0.0000 C   0  0  0  0  0  0           0  0  0
   -2.7034   -0.8414    0.0000 C   0  0  0  0  0  0           0  0  0
   -3.4172    0.3966    0.0000 C   0  0  0  0  0  0           0  0  0
    1.6172    0.8069    0.0000 C   0  0  0  0  0  0           0  0  0
    1.6069   -0.8586    0.0000 C   0  0  0  0  0  0           0  0  0
   -3.4172   -0.4310    0.0000 C   0  0  0  0  0  0           0  0  0
    2.3310    0.3897    0.0000 C   0  0  0  0  0  0           0  0  0
    2.3310   -0.4448    0.0000 C   0  0  0  0  0  0           0  0  0
    3.0448    0.8034    0.0000 C   0  0  0  0  0  0           0  0  0
    3.7586    0.3897    0.0000 O   0  0  0  0  0  0           0  0  0
    3.0552    1.6276    0.0000 O   0  0  0  0  0  0           0  0  0
  1  2  1  0     0  0
  1  3  1  0     0  0
  1  4  2  0     0  0
  2  5  1  0     0  0
  2  6  2  0     0  0
  3  7  1  0     0  0
  3  8  2  0     0  0
  4  9  1  0     0  0
  5 10  2  0     0  0
  6 11  1  0     0  0
  7 12  2  0     0  0
  8 13  1  0     0  0
  9 14  1  0     0  0
 11 15  1  0     0  0
 12 16  1  0     0  0
 14 17  2  0     0  0
 15 18  2  0     0  0
 17 19  1  0     0  0
 19 20  1  0     0  0
 19 21  2  0     0  0
  5  7  1  0     0  0
  9 11  2  0     0  0
 13 16  2  0     0  0
 17 18  1  0     0  0
M  END
>  <IDNUMBER>
BAS 01228893

>  <BOX>
1

>  <CELL>
A10

>  <WEIGHT>
10.0

>  <MOL_WEIGHT>
276.25

>  <STRUCT_FORMULA>
C16H8N2O3

>  <VENDOR_LOT>
229816

$$$$

          08231011372D 1   1.00000     0.00000     0

 17 20  0     0  0            999 V2000
   -1.1724    0.5069    0.0000 C   0  0  3  0  0  0           0  0  0
   -1.1724   -0.4552    0.0000 C   0  0  3  0  0  0           0  0  0
   -0.5207    1.2276    0.0000 C   0  0  0  0  0  0           0  0  0
   -2.1828    0.9276    0.0000 C   0  0  0  0  0  0           0  0  0
    0.2483   -0.6345    0.0000 C   0  0  0  0  0  0           0  0  0
   -0.4828   -1.1724    0.0000 C   0  0  0  0  0  0           0  0  0
    0.4379    1.2276    0.0000 C   0  0  0  0  0  0           0  0  0
   -1.0517    2.1966    0.0000 N   0  0  0  0  0  0           0  0  0
   -2.0517    1.9586    0.0000 N   0  0  0  0  0  0           0  0  0
   -3.1138    0.4276    0.0000 O   0  0  0  0  0  0           0  0  0
    1.1172    0.5069    0.0000 C   0  0  3  0  0  0           0  0  0
    0.5034   -1.1724    0.0000 C   0  0  0  0  0  0           0  0  0
    1.1172   -0.4552    0.0000 C   0  0  3  0  0  0           0  0  0
    1.0517   -2.1345    0.0000 N   0  0  0  0  0  0           0  0  0
    2.1517   -0.8207    0.0000 C   0  0  0  0  0  0           0  0  0
    2.0517   -1.8586    0.0000 N   0  0  0  0  0  0           0  0  0
    3.0655   -0.2931    0.0000 O   0  0  0  0  0  0           0  0  0
  1  2  1  0     0  0
  1  3  1  0     0  0
  1  4  1  0     0  0
  2  5  1  0     0  0
  2  6  1  0     0  0
  3  7  1  0     0  0
  3  8  2  0     0  0
  4  9  1  0     0  0
  4 10  2  0     0  0
  5 11  1  0     0  0
  6 12  1  0     0  0
 11 13  1  0     0  0
 12 14  2  0     0  0
 13 15  1  0     0  0
 14 16  1  0     0  0
 15 17  2  0     0  0
  7 11  1  0     0  0
  8  9  1  0     0  0
 12 13  1  0     0  0
 15 16  1  0     0  0
M  END
>  <IDNUMBER>
BAS 00185645

>  <BOX>
1

>  <CELL>
A11

>  <WEIGHT>
10.0

>  <MOL_WEIGHT>
232.24

>  <STRUCT_FORMULA>
C11H12N4O2

>  <VENDOR_LOT>
44656

$$$$

          08231011372D 1   1.00000     0.00000     0

 20 21  0     0  0            999 V2000
    0.1862    0.4379    0.0000 N   0  0  3  0  0  0           0  0  0
   -0.6759    0.1379    0.0000 C   0  0  0  0  0  0           0  0  0
    0.8862   -0.1621    0.0000 C   0  0  0  0  0  0           0  0  0
    0.5448    1.2793    0.0000 C   0  0  0  0  0  0           0  0  0
   -0.8345   -0.7621    0.0000 C   0  0  0  0  0  0           0  0  0
   -1.3759    0.7379    0.0000 C   0  0  0  0  0  0           0  0  0
    1.6655    0.3207    0.0000 C   0  0  3  0  0  0           0  0  0
    0.8241   -1.0793    0.0000 O   0  0  0  0  0  0           0  0  0
    1.4655    1.2000    0.0000 C   0  0  0  0  0  0           0  0  0
    0.0655    2.1000    0.0000 O   0  0  0  0  0  0           0  0  0
   -1.6966   -1.0793    0.0000 C   0  0  0  0  0  0           0  0  0
   -2.2345    0.4207    0.0000 C   0  0  0  0  0  0           0  0  0
    2.5241   -0.0414    0.0000 S   0  0  0  0  0  0           0  0  0
   -2.4138   -0.4793    0.0000 C   0  0  0  0  0  0           0  0  0
    3.2448    0.5379    0.0000 C   0  0  0  0  0  0           0  0  0
   -3.2966   -0.8000    0.0000 O   0  0  0  0  0  0           0  0  0
    4.1034    0.1793    0.0000 C   0  0  0  0  0  0           0  0  0
   -3.4759   -1.7000    0.0000 C   0  0  0  0  0  0           0  0  0
    4.8241    0.7586    0.0000 N   0  0  0  0  0  0           0  0  0
   -4.3345   -2.0000    0.0000 C   0  0  0  0  0  0           0  0  0
  1  2  1  0     0  0
  1  3  1  0     0  0
  1  4  1  0     0  0
  2  5  2  0     0  0
  2  6  1  0     0  0
  3  7  1  0     0  0
  3  8  2  0     0  0
  4  9  1  0     0  0
  4 10  2  0     0  0
  5 11  1  0     0  0
  6 12  2  0     0  0
  7 13  1  0     0  0
 11 14  2  0     0  0
 13 15  1  0     0  0
 14 16  1  0     0  0
 15 17  1  0     0  0
 16 18  1  0     0  0
 17 19  1  0     0  0
 18 20  1  0     0  0
  7  9  1  0     0  0
 12 14  1  0     0  0
M  END
>  <IDNUMBER>
BAS 01127805

>  <SALTDATA>
HCl

>  <BOX>
1

>  <CELL>
A12

>  <WEIGHT>
10.0

>  <MOL_WEIGHT>
294.37

>  <STRUCT_FORMULA>
C14H18N2O3S

>  <VENDOR_LOT>
178881

$$$$

          08231011372D 1   1.00000     0.00000     0

 21 23  0     0  0            999 V2000
    0.4345   -0.2690    0.0000 C   0  0  3  0  0  0           0  0  0
   -0.4828   -0.7897    0.0000 C   0  0  0  0  0  0           0  0  0
    0.4345    0.7897    0.0000 C   0  0  3  0  0  0           0  0  0
    1.3552   -0.7897    0.0000 C   0  0  0  0  0  0           0  0  0
   -0.4828   -1.8483    0.0000 C   0  0  0  0  0  0           0  0  0
   -1.4828   -0.4690    0.0000 C   0  0  0  0  0  0           0  0  0
    1.3552    1.3310    0.0000 C   0  0  0  0  0  0           0  0  0
   -0.4828    1.3310    0.0000 C   0  0  0  0  0  0           0  0  0
    1.3552   -1.8690    0.0000 C   0  0  0  0  0  0           0  0  0
    2.2759   -0.2310    0.0000 C   0  0  0  0  0  0           0  0  0
    0.4345   -2.3897    0.0000 O   0  0  0  0  0  0           0  0  0
   -1.4828   -2.1690    0.0000 N   0  0  0  0  0  0           0  0  0
   -2.1034   -1.3483    0.0000 N   0  0  0  0  0  0           0  0  0
   -1.8241    0.5517    0.0000 C   0  0  0  0  0  0           0  0  0
    1.3552    2.3897    0.0000 C   0  0  0  0  0  0           0  0  0
   -0.4828    2.3897    0.0000 C   0  0  0  0  0  0           0  0  0
    2.2759   -2.4310    0.0000 N   0  0  0  0  0  0           0  0  0
    3.1966    0.3310    0.0000 N   0  0  0  0  0  0           0  0  0
   -2.8828    0.7690    0.0000 C   0  0  0  0  0  0           0  0  0
    0.4345    2.9310    0.0000 C   0  0  0  0  0  0           0  0  0
   -3.2034    1.7897    0.0000 C   0  0  0  0  0  0           0  0  0
  1  2  1  0     0  0
  1  3  1  0     0  0
  1  4  1  0     0  0
  2  5  2  0     0  0
  2  6  1  0     0  0
  3  7  1  0     0  0
  3  8  1  0     0  0
  4  9  2  0     0  0
  4 10  1  0     0  0
  5 11  1  0     0  0
  5 12  1  0     0  0
  6 13  2  0     0  0
  6 14  1  0     0  0
  7 15  1  0     0  0
  8 16  1  0     0  0
  9 17  1  0     0  0
 10 18  3  0     0  0
 14 19  1  0     0  0
 15 20  1  0     0  0
 19 21  1  0     0  0
  9 11  1  0     0  0
 12 13  1  0     0  0
 16 20  2  0     0  0
M  END
>  <IDNUMBER>
BAS 01369655

>  <BOX>
1

>  <CELL>
B1

>  <WEIGHT>
10.0

>  <MOL_WEIGHT>
284.36

>  <STRUCT_FORMULA>
C16H20N4O

>  <VENDOR_LOT>
187749

$$$$

          08231011372D 1   1.00000     0.00000     0

 18 19  0     0  0            999 V2000
    0.5897   -0.0069    0.0000 C   0  0  0  0  0  0           0  0  0
    0.5897    0.7448    0.0000 C   0  0  0  0  0  0           0  0  0
   -0.0586   -0.3793    0.0000 C   0  0  0  0  0  0           0  0  0
    1.2414   -0.3793    0.0000 C   0  0  0  0  0  0           0  0  0
   -0.0586    1.1207    0.0000 C   0  0  0  0  0  0           0  0  0
   -0.0586   -1.1310    0.0000 C   0  0  0  0  0  0           0  0  0
    1.2414   -1.1310    0.0000 C   0  0  0  0  0  0           0  0  0
   -0.0586    1.9931    0.0000 C   0  0  0  0  0  0           0  0  0
   -0.8172    0.6828    0.0000 S   0  0  0  0  0  0           0  0  0
    0.5897   -1.5069    0.0000 C   0  0  0  0  0  0           0  0  0
   -0.7103   -1.5069    0.0000 O   0  0  0  0  0  0           0  0  0
    1.8897   -1.5069    0.0000 O   0  0  0  0  0  0           0  0  0
   -1.5724    1.9931    0.0000 N   0  0  0  0  0  0           0  0  0
    0.4690    2.5276    0.0000 O   0  0  0  0  0  0           0  0  0
   -1.5724    1.1207    0.0000 C   0  0  0  0  0  0           0  0  0
   -1.3586   -1.1310    0.0000 C   0  0  0  0  0  0           0  0  0
    1.8897   -2.2552    0.0000 C   0  0  0  0  0  0           0  0  0
   -2.2241    0.7448    0.0000 N   0  0  0  0  0  0           0  0  0
  1  2  1  0     0  0
  1  3  1  0     0  0
  1  4  2  0     0  0
  2  5  2  0     0  0
  3  6  2  0     0  0
  4  7  1  0     0  0
  5  8  1  0     0  0
  5  9  1  0     0  0
  6 10  1  0     0  0
  6 11  1  0     0  0
  7 12  1  0     0  0
  8 13  1  0     0  0
  8 14  2  0     0  0
  9 15  1  0     0  0
 11 16  1  0     0  0
 12 17  1  0     0  0
 15 18  2  0     0  0
  7 10  2  0     0  0
 13 15  1  0     0  0
M  END
>  <IDNUMBER>
BAS 03302082

>  <BOX>
1

>  <CELL>
B2

>  <WEIGHT>
10.0

>  <MOL_WEIGHT>
264.30

>  <STRUCT_FORMULA>
C12H12N2O3S

>  <VENDOR_LOT>
60180

$$$$

          08231011372D 1   1.00000     0.00000     0

 22 24  0     0  0            999 V2000
   -2.1379   -1.3517    0.0000 C   0  0  0  0  0  0           0  0  0
   -1.5621   -0.5724    0.0000 N   0  0  3  0  0  0           0  0  0
   -3.0897   -1.0862    0.0000 C   0  0  0  0  0  0           0  0  0
   -1.8897   -2.2897    0.0000 C   0  0  0  0  0  0           0  0  0
   -2.1759    0.2138    0.0000 C   0  0  0  0  0  0           0  0  0
   -0.5759   -0.5724    0.0000 C   0  0  0  0  0  0           0  0  0
   -3.0897   -0.1655    0.0000 N   0  0  0  0  0  0           0  0  0
   -3.7897   -1.7862    0.0000 C   0  0  0  0  0  0           0  0  0
   -2.5759   -3.0172    0.0000 C   0  0  0  0  0  0           0  0  0
   -1.9483    1.1621    0.0000 C   0  0  0  0  0  0           0  0  0
   -0.0897    0.2828    0.0000 C   0  0  3  0  0  0           0  0  0
   -3.5379   -2.7414    0.0000 C   0  0  0  0  0  0           0  0  0
    0.9034    0.2828    0.0000 C   0  0  0  0  0  0           0  0  0
   -0.5759    1.1276    0.0000 O   0  0  0  0  0  0           0  0  0
    1.4034    1.1276    0.0000 O   0  0  0  0  0  0           0  0  0
    2.4034    1.1276    0.0000 C   0  0  0  0  0  0           0  0  0
    2.9034    1.9586    0.0000 C   0  0  0  0  0  0           0  0  0
    2.9034    0.2483    0.0000 C   0  0  0  0  0  0           0  0  0
    3.8759    1.9345    0.0000 C   0  0  0  0  0  0           0  0  0
    3.9034    0.2483    0.0000 C   0  0  0  0  0  0           0  0  0
    4.3759    1.1138    0.0000 C   0  0  0  0  0  0           0  0  0
    4.3759    2.7621    0.0000 C   0  0  0  0  0  0           0  0  0
  1  2  1  0     0  0
  1  3  2  0     0  0
  1  4  1  0     0  0
  2  5  1  0     0  0
  2  6  1  0     0  0
  3  7  1  0     0  0
  3  8  1  0     0  0
  4  9  2  0     0  0
  5 10  1  0     0  0
  6 11  1  0     0  0
  8 12  2  0     0  0
 11 13  1  0     0  0
 11 14  1  0     0  0
 13 15  1  0     0  0
 15 16  1  0     0  0
 16 17  1  0     0  0
 16 18  2  0     0  0
 17 19  2  0     0  0
 18 20  1  0     0  0
 19 21  1  0     0  0
 19 22  1  0     0  0
  5  7  2  0     0  0
  9 12  1  0     0  0
 20 21  2  0     0  0
M  END
>  <IDNUMBER>
BAS 01813454

>  <BOX>
1

>  <CELL>
B3

>  <WEIGHT>
10.0

>  <MOL_WEIGHT>
296.37

>  <STRUCT_FORMULA>
C18H20N2O2

>  <VENDOR_LOT>
283786

$$$$

          08231011372D 1   1.00000     0.00000     0

 15 16  0     0  0            999 V2000
    0.0034    0.5103    0.0000 C   0  0  0  0  0  0           0  0  0
    0.0034   -1.1207    0.0000 C   0  0  0  0  0  0           0  0  0
    1.5517    1.0103    0.0000 N   0  0  3  0  0  0           0  0  0
   -1.4069    1.3207    0.0000 C   0  0  0  0  0  0           0  0  0
    1.5517   -1.6207    0.0000 N   0  0  0  0  0  0           0  0  0
   -1.4069   -1.9276    0.0000 N   0  0  3  0  0  0           0  0  0
    2.4931   -0.2897    0.0000 C   0  0  0  0  0  0           0  0  0
    2.0931    2.5690    0.0000 C   0  0  0  0  0  0           0  0  0
   -2.8172    0.5069    0.0000 N   0  0  0  0  0  0           0  0  0
   -1.4069    2.9690    0.0000 O   0  0  0  0  0  0           0  0  0
   -2.8172   -1.1069    0.0000 C   0  0  0  0  0  0           0  0  0
   -1.4069   -3.5586    0.0000 C   0  0  0  0  0  0           0  0  0
    4.1172   -0.2448    0.0000 S   0  0  0  0  0  0           0  0  0
    3.6931    2.8931    0.0000 C   0  0  0  0  0  0           0  0  0
   -4.2483   -1.9069    0.0000 O   0  0  0  0  0  0           0  0  0
  1  2  2  0     0  0
  1  3  1  0     0  0
  1  4  1  0     0  0
  2  5  1  0     0  0
  2  6  1  0     0  0
  3  7  1  0     0  0
  3  8  1  0     0  0
  4  9  1  0     0  0
  4 10  2  0     0  0
  6 11  1  0     0  0
  6 12  1  0     0  0
  7 13  1  0     0  0
  8 14  1  0     0  0
 11 15  2  0     0  0
  5  7  2  0     0  0
  9 11  1  0     0  0
M  END
>  <IDNUMBER>
BAS 00162658

>  <BOX>
1

>  <CELL>
B4

>  <WEIGHT>
10.0

>  <MOL_WEIGHT>
226.26

>  <STRUCT_FORMULA>
C8H10N4O2S

>  <VENDOR_LOT>
32629

$$$$

          08231011372D 1   1.00000     0.00000     0

 21 23  0     0  0            999 V2000
   -0.3034    0.0207    0.0000 C   0  0  3  0  0  0           0  0  0
    0.4000   -0.4000    0.0000 C   0  0  0  0  0  0           0  0  0
   -0.3000    0.8448    0.0000 C   0  0  0  0  0  0           0  0  0
   -1.0103   -0.3931    0.0000 C   0  0  0  0  0  0           0  0  0
    0.4103   -1.2172    0.0000 C   0  0  0  0  0  0           0  0  0
    1.1000    0.0207    0.0000 C   0  0  0  0  0  0           0  0  0
   -1.0103    1.2552    0.0000 C   0  0  0  0  0  0           0  0  0
    0.4138    1.2552    0.0000 C   0  0  0  0  0  0           0  0  0
   -1.0103   -1.2172    0.0000 C   0  0  0  0  0  0           0  0  0
   -1.7241    0.0103    0.0000 C   0  0  0  0  0  0           0  0  0
   -0.3034   -1.6310    0.0000 O   0  0  0  0  0  0           0  0  0
    1.1138   -1.6172    0.0000 C   0  0  0  0  0  0           0  0  0
    1.8138   -0.3897    0.0000 O   0  0  0  0  0  0           0  0  0
    1.1000    0.8448    0.0000 O   0  0  0  0  0  0           0  0  0
   -1.0103    2.0828    0.0000 C   0  0  0  0  0  0           0  0  0
    0.4207    2.0828    0.0000 C   0  0  0  0  0  0           0  0  0
   -1.7241   -1.6379    0.0000 N   0  0  0  0  0  0           0  0  0
   -2.4414    0.4241    0.0000 N   0  0  0  0  0  0           0  0  0
    1.8207   -1.2069    0.0000 C   0  0  0  0  0  0           0  0  0
   -0.2897    2.4931    0.0000 N   0  0  0  0  0  0           0  0  0
    2.5379   -1.6172    0.0000 C   0  0  0  0  0  0           0  0  0
  1  2  1  0     0  0
  1  3  1  0     0  0
  1  4  1  0     0  0
  2  5  2  0     0  0
  2  6  1  0     0  0
  3  7  1  0     0  0
  3  8  2  0     0  0
  4  9  2  0     0  0
  4 10  1  0     0  0
  5 11  1  0     0  0
  5 12  1  0     0  0
  6 13  1  0     0  0
  6 14  2  0     0  0
  7 15  2  0     0  0
  8 16  1  0     0  0
  9 17  1  0     0  0
 10 18  3  0     0  0
 12 19  2  0     0  0
 15 20  1  0     0  0
 19 21  1  0     0  0
  9 11  1  0     0  0
 13 19  1  0     0  0
 16 20  2  0     0  0
M  END
>  <IDNUMBER>
BAS 00779730

>  <BOX>
1

>  <CELL>
B5

>  <WEIGHT>
10.0

>  <MOL_WEIGHT>
281.27

>  <STRUCT_FORMULA>
C15H11N3O3

>  <VENDOR_LOT>
61791

$$$$

          08231011372D 1   1.00000     0.00000     0

 19 20  0     0  0            999 V2000
   -0.8172    1.6483    0.0000 C   0  0  0  0  0  0           0  0  0
   -0.5310    0.8241    0.0000 C   0  0  0  0  0  0           0  0  0
   -1.6931    1.6483    0.0000 C   0  0  0  0  0  0           0  0  0
   -0.3103    2.3517    0.0000 N   0  3  0  0  0  0           0  0  0
    0.3069    0.6034    0.0000 N   0  0  0  0  0  0           0  0  0
   -1.2621    0.2724    0.0000 N   0  0  0  0  0  0           0  0  0
   -1.9828    0.8034    0.0000 N   0  0  0  0  0  0           0  0  0
   -2.1966    2.3517    0.0000 C   0  0  0  0  0  0           0  0  0
   -0.6828    3.1345    0.0000 O   0  0  0  0  0  0           0  0  0
    0.5517    2.2483    0.0000 O   0  5  0  0  0  0           0  0  0
    0.5310   -0.2483    0.0000 C   0  0  0  0  0  0           0  0  0
    1.3897   -0.4862    0.0000 C   0  0  0  0  0  0           0  0  0
   -0.0621   -0.8966    0.0000 C   0  0  0  0  0  0           0  0  0
    1.6172   -1.3138    0.0000 C   0  0  0  0  0  0           0  0  0
    0.1897   -1.7345    0.0000 C   0  0  0  0  0  0           0  0  0
    1.0172   -1.9655    0.0000 C   0  0  0  0  0  0           0  0  0
    1.2379   -2.8138    0.0000 C   0  0  0  0  0  0           0  0  0
    0.5897   -3.3759    0.0000 O   0  0  0  0  0  0           0  0  0
    2.1034   -3.0483    0.0000 O   0  0  0  0  0  0           0  0  0
  1  2  2  0     0  0
  1  3  1  0     0  0
  1  4  1  0     0  0
  2  5  1  0     0  0
  2  6  1  0     0  0
  3  7  2  0     0  0
  3  8  1  0     0  0
  4  9  2  0     0  0
  4 10  1  0     0  0
  5 11  1  0     0  0
 11 12  1  0     0  0
 11 13  2  0     0  0
 12 14  2  0     0  0
 13 15  1  0     0  0
 14 16  1  0     0  0
 16 17  1  0     0  0
 17 18  1  0     0  0
 17 19  2  0     0  0
  6  7  1  0     0  0
 15 16  2  0     0  0
M  CHG  2   4   1  10  -1
M  END
>  <IDNUMBER>
BAS 00165100

>  <BOX>
1

>  <CELL>
B6

>  <WEIGHT>
10.0

>  <MOL_WEIGHT>
262.22

>  <STRUCT_FORMULA>
C11H10N4O4

>  <VENDOR_LOT>
175074

$$$$

          08231011372D 1   1.00000     0.00000     0

 19 20  0     0  0            999 V2000
   -1.2000    0.7517    0.0000 C   0  0  0  0  0  0           0  0  0
   -1.2000   -0.6552    0.0000 C   0  0  0  0  0  0           0  0  0
    0.1483    1.1931    0.0000 N   0  0  3  0  0  0           0  0  0
   -2.4345    1.4655    0.0000 C   0  0  0  0  0  0           0  0  0
    0.1483   -1.1000    0.0000 N   0  0  0  0  0  0           0  0  0
   -2.4345   -1.3690    0.0000 N   0  0  3  0  0  0           0  0  0
    0.9655    0.0517    0.0000 C   0  0  0  0  0  0           0  0  0
    0.6000    2.5517    0.0000 C   0  0  0  0  0  0           0  0  0
   -3.6586    0.7517    0.0000 N   0  0  0  0  0  0           0  0  0
   -2.4345    2.8793    0.0000 O   0  0  0  0  0  0           0  0  0
   -3.6586   -0.6552    0.0000 C   0  0  0  0  0  0           0  0  0
   -2.4345   -2.7862    0.0000 C   0  0  0  0  0  0           0  0  0
    2.3931    0.0655    0.0000 S   0  0  0  0  0  0           0  0  0
    1.9931    2.8448    0.0000 C   0  0  0  0  0  0           0  0  0
   -4.9069   -1.3690    0.0000 O   0  0  0  0  0  0           0  0  0
    3.1000   -1.1552    0.0000 C   0  0  0  0  0  0           0  0  0
    4.5276   -1.1483    0.0000 C   0  0  0  0  0  0           0  0  0
    5.2414   -2.3862    0.0000 O   0  0  0  0  0  0           0  0  0
    5.2414    0.0759    0.0000 O   0  0  0  0  0  0           0  0  0
  1  2  2  0     0  0
  1  3  1  0     0  0
  1  4  1  0     0  0
  2  5  1  0     0  0
  2  6  1  0     0  0
  3  7  1  0     0  0
  3  8  1  0     0  0
  4  9  1  0     0  0
  4 10  2  0     0  0
  6 11  1  0     0  0
  6 12  1  0     0  0
  7 13  1  0     0  0
  8 14  1  0     0  0
 11 15  2  0     0  0
 13 16  1  0     0  0
 16 17  1  0     0  0
 17 18  1  0     0  0
 17 19  2  0     0  0
  5  7  2  0     0  0
  9 11  1  0     0  0
M  END
>  <IDNUMBER>
BAS 00162657

>  <BOX>
1

>  <CELL>
B7

>  <WEIGHT>
10.0

>  <MOL_WEIGHT>
284.29

>  <STRUCT_FORMULA>
C10H12N4O4S

>  <VENDOR_LOT>
100794

$$$$

          08231011372D 1   1.00000     0.00000     0

 22 23  0     0  0            999 V2000
    0.3862    1.5828    0.0000 C   0  0  0  0  0  0           0  0  0
    1.0517    2.7310    0.0000 C   0  0  0  0  0  0           0  0  0
   -0.9034    1.2310    0.0000 C   0  0  0  0  0  0           0  0  0
    1.0483    0.4276    0.0000 C   0  0  0  0  0  0           0  0  0
    2.3793    2.7310    0.0000 C   0  0  0  0  0  0           0  0  0
    0.3724    3.8966    0.0000 N   0  3  0  0  0  0           0  0  0
   -1.5690    0.0690    0.0000 O   0  0  0  0  0  0           0  0  0
   -1.5828    2.4000    0.0000 O   0  0  0  0  0  0           0  0  0
    2.3793    0.4207    0.0000 C   0  0  0  0  0  0           0  0  0
    3.0483    1.5724    0.0000 C   0  0  0  0  0  0           0  0  0
   -0.5793    4.8517    0.0000 O   0  0  0  0  0  0           0  0  0
    1.6793    4.2448    0.0000 O   0  5  0  0  0  0           0  0  0
   -1.5586   -1.2724    0.0000 C   0  0  0  0  0  0           0  0  0
   -0.3966   -1.9414    0.0000 C   0  0  0  0  0  0           0  0  0
   -2.7069   -1.9414    0.0000 C   0  0  0  0  0  0           0  0  0
   -0.3966   -3.2759    0.0000 C   0  0  0  0  0  0           0  0  0
    0.6897   -1.7483    0.0000 C   0  0  0  0  0  0           0  0  0
   -2.7069   -3.2690    0.0000 C   0  0  0  0  0  0           0  0  0
   -1.5517   -3.9414    0.0000 C   0  0  0  0  0  0           0  0  0
    1.2448   -2.7000    0.0000 C   0  0  0  0  0  0           0  0  0
    1.2379   -0.7931    0.0000 O   0  0  0  0  0  0           0  0  0
   -1.5621   -5.2759    0.0000 C   0  0  0  0  0  0           0  0  0
  1  2  1  0     0  0
  1  3  1  0     0  0
  1  4  2  0     0  0
  2  5  2  0     0  0
  2  6  1  0     0  0
  3  7  1  0     0  0
  3  8  2  0     0  0
  4  9  1  0     0  0
  5 10  1  0     0  0
  6 11  2  0     0  0
  6 12  1  0     0  0
  7 13  1  0     0  0
 13 14  1  0     0  0
 13 15  2  0     0  0
 14 16  2  0     0  0
 14 17  1  0     0  0
 15 18  1  0     0  0
 16 19  1  0     0  0
 17 20  1  0     0  0
 17 21  2  0     0  0
 19 22  1  0     0  0
  9 10  2  0     0  0
 18 19  2  0     0  0
M  CHG  2   6   1  12  -1
M  END
>  <IDNUMBER>
BAS 01121931

>  <BOX>
1

>  <CELL>
B8

>  <WEIGHT>
10.0

>  <MOL_WEIGHT>
299.28

>  <STRUCT_FORMULA>
C16H13NO5

>  <VENDOR_LOT>
224836

$$$$

          08231011372D 1   1.00000     0.00000     0

 21 22  0     0  0            999 V2000
   -1.0793    0.5828    0.0000 C   0  0  0  0  0  0           0  0  0
   -1.0793   -0.2483    0.0000 C   0  0  0  0  0  0           0  0  0
   -1.7966    0.9931    0.0000 C   0  0  0  0  0  0           0  0  0
   -0.3690    0.9931    0.0000 C   0  0  0  0  0  0           0  0  0
   -1.7966   -0.6586    0.0000 N   0  0  0  0  0  0           0  0  0
   -0.3724   -0.6586    0.0000 S   0  0  0  0  0  0           0  0  0
   -2.5034    0.5828    0.0000 C   0  0  0  0  0  0           0  0  0
   -1.8034    1.8138    0.0000 C   0  0  0  0  0  0           0  0  0
    0.3448    1.4103    0.0000 N   0  0  0  0  0  0           0  0  0
   -2.5103   -0.2483    0.0000 C   0  0  0  0  0  0           0  0  0
    0.3414   -0.2379    0.0000 C   0  0  0  0  0  0           0  0  0
   -3.2207   -0.6586    0.0000 C   0  0  0  0  0  0           0  0  0
    1.0586   -0.6448    0.0000 C   0  0  0  0  0  0           0  0  0
    1.7621   -0.2276    0.0000 C   0  0  0  0  0  0           0  0  0
    1.0586   -1.4655    0.0000 C   0  0  0  0  0  0           0  0  0
    2.4759   -0.6276    0.0000 C   0  0  0  0  0  0           0  0  0
    1.7483    0.6034    0.0000 C   0  0  0  0  0  0           0  0  0
    1.7759   -1.8724    0.0000 C   0  0  0  0  0  0           0  0  0
    2.4862   -1.4552    0.0000 C   0  0  0  0  0  0           0  0  0
    2.4586    1.0241    0.0000 O   0  0  0  0  0  0           0  0  0
    1.0276    1.0034    0.0000 O   0  0  0  0  0  0           0  0  0
  1  2  1  0     0  0
  1  3  2  0     0  0
  1  4  1  0     0  0
  2  5  2  0     0  0
  2  6  1  0     0  0
  3  7  1  0     0  0
  3  8  1  0     0  0
  4  9  3  0     0  0
  5 10  1  0     0  0
  6 11  1  0     0  0
 10 12  1  0     0  0
 11 13  1  0     0  0
 13 14  1  0     0  0
 13 15  2  0     0  0
 14 16  2  0     0  0
 14 17  1  0     0  0
 15 18  1  0     0  0
 16 19  1  0     0  0
 17 20  1  0     0  0
 17 21  2  0     0  0
  7 10  2  0     0  0
 18 19  2  0     0  0
M  END
>  <IDNUMBER>
BAS 00869299

>  <BOX>
1

>  <CELL>
B9

>  <WEIGHT>
10.0

>  <MOL_WEIGHT>
298.36

>  <STRUCT_FORMULA>
C16H14N2O2S

>  <VENDOR_LOT>
42161

$$$$

          08231011372D 1   1.00000     0.00000     0

 18 20  0     0  0            999 V2000
   -1.1034    0.2069    0.0000 C   0  0  0  0  0  0           0  0  0
   -0.8414   -0.4172    0.0000 C   0  0  0  0  0  0           0  0  0
   -1.8034    0.1828    0.0000 C   0  0  0  0  0  0           0  0  0
   -0.7724    0.8379    0.0000 C   0  0  0  0  0  0           0  0  0
   -1.3897   -0.8414    0.0000 C   0  0  0  0  0  0           0  0  0
   -0.1517   -0.6000    0.0000 C   0  0  0  0  0  0           0  0  0
   -1.9862   -0.4655    0.0000 N   0  0  0  0  0  0           0  0  0
   -2.1862    0.7586    0.0000 C   0  0  0  0  0  0           0  0  0
   -1.1621    1.4379    0.0000 C   0  0  0  0  0  0           0  0  0
    0.3276   -0.1172    0.0000 N   0  0  0  0  0  0           0  0  0
   -1.8621    1.3966    0.0000 C   0  0  0  0  0  0           0  0  0
    1.0379   -0.2931    0.0000 C   0  0  0  0  0  0           0  0  0
    1.5276    0.1862    0.0000 C   0  0  0  0  0  0           0  0  0
    1.1966   -0.9793    0.0000 C   0  0  0  0  0  0           0  0  0
    2.2138    0.0207    0.0000 C   0  0  0  0  0  0           0  0  0
    1.8759   -1.1483    0.0000 C   0  0  0  0  0  0           0  0  0
    2.3897   -0.6793    0.0000 C   0  0  0  0  0  0           0  0  0
    2.6966    0.5069    0.0000 O   0  0  0  0  0  0           0  0  0
  1  2  1  0     0  0
  1  3  2  0     0  0
  1  4  1  0     0  0
  2  5  2  0     0  0
  2  6  1  0     0  0
  3  7  1  0     0  0
  3  8  1  0     0  0
  4  9  2  0     0  0
  6 10  2  0     0  0
  8 11  2  0     0  0
 10 12  1  0     0  0
 12 13  1  0     0  0
 12 14  2  0     0  0
 13 15  2  0     0  0
 14 16  1  0     0  0
 15 17  1  0     0  0
 15 18  1  0     0  0
  5  7  1  0     0  0
  9 11  1  0     0  0
 16 17  2  0     0  0
M  END
>  <IDNUMBER>
BAS 00548966

>  <BOX>
1

>  <CELL>
B10

>  <WEIGHT>
10.0

>  <MOL_WEIGHT>
236.27

>  <STRUCT_FORMULA>
C15H12N2O

>  <VENDOR_LOT>
40166

$$$$

          08231011372D 1   1.00000     0.00000     0

 16 16  0     0  0            999 V2000
   -0.4690   -0.1966    0.0000 C   0  0  0  0  0  0           0  0  0
   -1.7034    0.5552    0.0000 C   0  0  0  0  0  0           0  0  0
    0.8207    0.5552    0.0000 C   0  0  0  0  0  0           0  0  0
   -0.4690   -1.6483    0.0000 C   0  0  0  0  0  0           0  0  0
   -1.7034    2.0069    0.0000 C   0  0  0  0  0  0           0  0  0
   -2.9897   -0.1724    0.0000 O   0  0  0  0  0  0           0  0  0
    0.8207    2.0069    0.0000 C   0  0  0  0  0  0           0  0  0
    0.7345   -2.4103    0.0000 S   0  0  0  0  0  0           0  0  0
   -0.4690    2.7276    0.0000 C   0  0  0  0  0  0           0  0  0
   -4.2034    0.5897    0.0000 C   0  0  0  0  0  0           0  0  0
    2.0310    2.7690    0.0000 C   0  0  0  0  0  0           0  0  0
    0.7345   -3.8621    0.0000 C   0  0  0  0  0  0           0  0  0
    3.3483    2.0759    0.0000 C   0  0  0  0  0  0           0  0  0
    2.0310    4.2069    0.0000 O   0  0  0  0  0  0           0  0  0
   -0.5172   -4.5828    0.0000 N   0  0  0  0  0  0           0  0  0
    1.9966   -4.6241    0.0000 N   0  0  0  0  0  0           0  0  0
  1  2  1  0     0  0
  1  3  2  0     0  0
  1  4  1  0     0  0
  2  5  2  0     0  0
  2  6  1  0     0  0
  3  7  1  0     0  0
  4  8  1  0     0  0
  5  9  1  0     0  0
  6 10  1  0     0  0
  7 11  1  0     0  0
  8 12  1  0     0  0
 11 13  1  0     0  0
 11 14  2  0     0  0
 12 15  1  0     0  0
 12 16  2  0     0  0
  7  9  2  0     0  0
M  END
>  <IDNUMBER>
BAS 02788892

>  <SALTDATA>
HCl

>  <BOX>
1

>  <CELL>
B11

>  <WEIGHT>
10.0

>  <MOL_WEIGHT>
238.31

>  <STRUCT_FORMULA>
C11H14N2O2S

>  <VENDOR_LOT>
262589

$$$$

          08231011372D 1   1.00000     0.00000     0

 20 22  0     0  0            999 V2000
    2.5793   -0.7862    0.0000 C   0  0  0  0  0  0           0  0  0
    1.2103   -0.7862    0.0000 C   0  0  0  0  0  0           0  0  0
    3.2207    0.3759    0.0000 C   0  0  0  0  0  0           0  0  0
    3.4793   -1.7862    0.0000 C   0  0  0  0  0  0           0  0  0
    0.5724    0.3759    0.0000 C   0  0  0  0  0  0           0  0  0
    0.5724   -1.9517    0.0000 C   0  0  0  0  0  0           0  0  0
    2.5448    1.5345    0.0000 C   0  0  0  0  0  0           0  0  0
    4.5207    0.0862    0.0000 C   0  0  0  0  0  0           0  0  0
    4.6793   -1.2138    0.0000 C   0  0  0  0  0  0           0  0  0
   -0.7793    0.3759    0.0000 C   0  0  0  0  0  0           0  0  0
    1.2103    1.5345    0.0000 O   0  0  0  0  0  0           0  0  0
   -0.7517   -1.9862    0.0000 C   0  0  0  0  0  0           0  0  0
    3.1931    2.7483    0.0000 O   0  0  0  0  0  0           0  0  0
   -1.4690   -0.7862    0.0000 C   0  0  0  0  0  0           0  0  0
   -2.7897   -0.7862    0.0000 O   0  0  0  0  0  0           0  0  0
   -3.4793    0.3759    0.0000 C   0  0  3  0  0  0           0  0  0
   -4.7897    0.3759    0.0000 C   0  0  0  0  0  0           0  0  0
   -2.7897    1.5345    0.0000 C   0  0  0  0  0  0           0  0  0
   -5.4690    1.5345    0.0000 O   0  0  0  0  0  0           0  0  0
   -5.4690   -0.7862    0.0000 O   0  0  0  0  0  0           0  0  0
  1  2  1  0     0  0
  1  3  2  0     0  0
  1  4  1  0     0  0
  2  5  2  0     0  0
  2  6  1  0     0  0
  3  7  1  0     0  0
  3  8  1  0     0  0
  4  9  1  0     0  0
  5 10  1  0     0  0
  5 11  1  0     0  0
  6 12  2  0     0  0
  7 13  2  0     0  0
 10 14  2  0     0  0
 14 15  1  0     0  0
 15 16  1  0     0  0
 16 17  1  0     0  0
 16 18  1  0     0  0
 17 19  1  0     0  0
 17 20  2  0     0  0
  7 11  1  0     0  0
  8  9  1  0     0  0
 12 14  1  0     0  0
M  END
>  <IDNUMBER>
BAS 00872477

>  <BOX>
1

>  <CELL>
B12

>  <WEIGHT>
10.0

>  <MOL_WEIGHT>
274.27

>  <STRUCT_FORMULA>
C15H14O5

>  <VENDOR_LOT>
245086

$$$$

          08231011372D 1   1.00000     0.00000     0

 18 19  0     0  0            999 V2000
   -0.0966    0.2621    0.0000 C   0  0  0  0  0  0           0  0  0
   -0.9069   -0.2138    0.0000 C   0  0  0  0  0  0           0  0  0
    0.7241   -0.2138    0.0000 N   0  0  0  0  0  0           0  0  0
   -0.0966    1.1966    0.0000 C   0  0  0  0  0  0           0  0  0
   -0.9069   -1.1517    0.0000 C   0  0  0  0  0  0           0  0  0
   -1.7207    0.2621    0.0000 C   0  0  0  0  0  0           0  0  0
    1.5414    0.2621    0.0000 C   0  0  0  0  0  0           0  0  0
    0.7138    1.6759    0.0000 C   0  0  0  0  0  0           0  0  0
   -1.7207   -1.6241    0.0000 C   0  0  0  0  0  0           0  0  0
   -2.5241   -0.2138    0.0000 C   0  0  0  0  0  0           0  0  0
    1.5414    1.2103    0.0000 C   0  0  0  0  0  0           0  0  0
    2.3414   -0.2034    0.0000 O   0  0  0  0  0  0           0  0  0
   -2.5241   -1.1517    0.0000 C   0  0  0  0  0  0           0  0  0
   -1.7207   -2.5517    0.0000 O   0  0  0  0  0  0           0  0  0
    2.3552    1.6655    0.0000 C   0  0  0  0  0  0           0  0  0
   -2.5069   -3.0138    0.0000 C   0  0  0  0  0  0           0  0  0
    2.3414    2.5966    0.0000 O   0  0  0  0  0  0           0  0  0
    3.1759    1.2103    0.0000 O   0  0  0  0  0  0           0  0  0
  1  2  1  0     0  0
  1  3  1  0     0  0
  1  4  2  0     0  0
  2  5  2  0     0  0
  2  6  1  0     0  0
  3  7  1  0     0  0
  4  8  1  0     0  0
  5  9  1  0     0  0
  6 10  2  0     0  0
  7 11  1  0     0  0
  7 12  2  0     0  0
  9 13  2  0     0  0
  9 14  1  0     0  0
 11 15  1  0     0  0
 14 16  1  0     0  0
 15 17  1  0     0  0
 15 18  2  0     0  0
  8 11  2  0     0  0
 10 13  1  0     0  0
M  END
>  <IDNUMBER>
BAS 10145594

>  <BOX>
1

>  <CELL>
C1

>  <WEIGHT>
10.0

>  <MOL_WEIGHT>
245.23

>  <STRUCT_FORMULA>
C13H11NO4

>  <VENDOR_LOT>
1120987

$$$$

          08231011372D 1   1.00000     0.00000     0

 19 20  0     0  0            999 V2000
    0.9310    0.0138    0.0000 C   0  0  0  0  0  0           0  0  0
    1.7069    0.4759    0.0000 N   0  0  3  0  0  0           0  0  0
    0.1517    0.4586    0.0000 C   0  0  0  0  0  0           0  0  0
    0.9310   -0.9241    0.0000 C   0  0  0  0  0  0           0  0  0
    2.5517    0.1586    0.0000 C   0  0  0  0  0  0           0  0  0
    1.5517    1.3586    0.0000 C   0  0  0  0  0  0           0  0  0
   -0.6103   -0.0034    0.0000 C   0  0  0  0  0  0           0  0  0
    0.1517   -1.3655    0.0000 C   0  0  0  0  0  0           0  0  0
    3.2310    0.7345    0.0000 C   0  0  0  0  0  0           0  0  0
    2.2310    1.9138    0.0000 C   0  0  0  0  0  0           0  0  0
   -0.6103   -0.9034    0.0000 C   0  0  0  0  0  0           0  0  0
   -1.4103    0.4759    0.0000 N   0  0  0  0  0  0           0  0  0
    3.0690    1.6138    0.0000 O   0  0  0  0  0  0           0  0  0
   -1.4103   -1.3655    0.0000 N   0  3  0  0  0  0           0  0  0
   -2.1931    0.0345    0.0000 C   0  0  0  0  0  0           0  0  0
   -1.4103   -2.2862    0.0000 O   0  0  0  0  0  0           0  0  0
   -2.1690   -0.9241    0.0000 O   0  5  0  0  0  0           0  0  0
   -2.9690    0.4966    0.0000 C   0  0  0  0  0  0           0  0  0
   -3.7483    0.0586    0.0000 O   0  0  0  0  0  0           0  0  0
  1  2  1  0     0  0
  1  3  1  0     0  0
  1  4  2  0     0  0
  2  5  1  0     0  0
  2  6  1  0     0  0
  3  7  2  0     0  0
  4  8  1  0     0  0
  5  9  1  0     0  0
  6 10  1  0     0  0
  7 11  1  0     0  0
  7 12  1  0     0  0
  9 13  1  0     0  0
 11 14  1  0     0  0
 12 15  1  0     0  0
 14 16  2  0     0  0
 14 17  1  0     0  0
 15 18  1  0     0  0
 18 19  1  0     0  0
  8 11  2  0     0  0
 10 13  1  0     0  0
M  CHG  2  14   1  17  -1
M  END
>  <IDNUMBER>
BAS 00434923

>  <BOX>
1

>  <CELL>
C2

>  <WEIGHT>
10.0

>  <MOL_WEIGHT>
267.28

>  <STRUCT_FORMULA>
C12H17N3O4

>  <VENDOR_LOT>
184833

$$$$

          08231011372D 1   1.00000     0.00000     0

 21 22  0     0  0            999 V2000
    0.6655   -0.8103    0.0000 C   0  0  3  0  0  0           0  0  0
    1.3655   -0.5897    0.0000 C   0  0  0  0  0  0           0  0  0
    0.6655   -1.5517    0.0000 C   0  0  0  0  0  0           0  0  0
    0.0276   -0.4517    0.0000 N   0  0  0  0  0  0           0  0  0
    1.7655   -1.1897    0.0000 N   0  0  3  0  0  0           0  0  0
    1.6069    0.0897    0.0000 O   0  0  0  0  0  0           0  0  0
    1.3655   -1.7724    0.0000 N   0  0  0  0  0  0           0  0  0
    0.0655   -1.9897    0.0000 C   0  0  0  0  0  0           0  0  0
    0.0276    0.2724    0.0000 N   0  0  0  0  0  0           0  0  0
    2.4828   -1.2034    0.0000 C   0  0  0  0  0  0           0  0  0
   -0.6172    0.6483    0.0000 C   0  0  0  0  0  0           0  0  0
    2.8310   -1.8276    0.0000 N   0  0  0  0  0  0           0  0  0
    2.8448   -0.5759    0.0000 O   0  0  0  0  0  0           0  0  0
   -0.6172    1.3897    0.0000 C   0  0  0  0  0  0           0  0  0
   -1.2345    0.2897    0.0000 C   0  0  0  0  0  0           0  0  0
   -1.2345    1.7483    0.0000 C   0  0  0  0  0  0           0  0  0
   -1.8724    0.6483    0.0000 C   0  0  0  0  0  0           0  0  0
   -1.8724    1.3724    0.0000 C   0  0  0  0  0  0           0  0  0
   -2.5172    1.7103    0.0000 C   0  0  0  0  0  0           0  0  0
   -2.5241    2.4103    0.0000 N   0  0  0  0  0  0           0  0  0
   -3.2069    1.3897    0.0000 O   0  0  0  0  0  0           0  0  0
  1  2  1  0     0  0
  1  3  1  0     0  0
  1  4  1  0     0  0
  2  5  1  0     0  0
  2  6  2  0     0  0
  3  7  2  0     0  0
  3  8  1  0     0  0
  4  9  2  0     0  0
  5 10  1  0     0  0
  9 11  1  0     0  0
 10 12  1  0     0  0
 10 13  2  0     0  0
 11 14  1  0     0  0
 11 15  2  0     0  0
 14 16  2  0     0  0
 15 17  1  0     0  0
 16 18  1  0     0  0
 18 19  1  0     0  0
 19 20  1  0     0  0
 19 21  2  0     0  0
  5  7  1  0     0  0
 17 18  2  0     0  0
M  END
>  <IDNUMBER>
BAS 00417293

>  <BOX>
1

>  <CELL>
C3

>  <WEIGHT>
10.0

>  <MOL_WEIGHT>
288.27

>  <STRUCT_FORMULA>
C12H12N6O3

>  <VENDOR_LOT>
114810

$$$$

          08231011372D 1   1.00000     0.00000     0

 21 22  0     0  0            999 V2000
    2.6552   -2.0552    0.0000 C   0  0  0  0  0  0           0  0  0
    3.6241   -1.0517    0.0000 C   0  0  0  0  0  0           0  0  0
    1.2966   -1.7310    0.0000 C   0  0  0  0  0  0           0  0  0
    3.0379   -3.3897    0.0000 O   0  0  0  0  0  0           0  0  0
    3.2379    0.2897    0.0000 C   0  0  0  0  0  0           0  0  0
    4.9793   -1.3828    0.0000 O   0  0  0  0  0  0           0  0  0
    0.9000   -0.3897    0.0000 C   0  0  0  0  0  0           0  0  0
    4.3862   -3.7345    0.0000 C   0  0  0  0  0  0           0  0  0
    1.8759    0.6276    0.0000 C   0  0  0  0  0  0           0  0  0
    5.3586   -2.7310    0.0000 C   0  0  0  0  0  0           0  0  0
   -0.4483   -0.0759    0.0000 C   0  0  0  0  0  0           0  0  0
   -0.8552    1.2793    0.0000 N   0  0  0  0  0  0           0  0  0
   -1.4241   -1.0793    0.0000 O   0  0  0  0  0  0           0  0  0
   -2.2172    1.6034    0.0000 C   0  0  3  0  0  0           0  0  0
   -3.1793    0.5862    0.0000 C   0  0  0  0  0  0           0  0  0
   -2.6172    2.9448    0.0000 C   0  0  0  0  0  0           0  0  0
   -4.5414    0.9069    0.0000 C   0  0  3  0  0  0           0  0  0
   -3.9793    3.2690    0.0000 O   0  0  0  0  0  0           0  0  0
   -1.6552    3.9621    0.0000 O   0  0  0  0  0  0           0  0  0
   -5.5000   -0.1034    0.0000 C   0  0  0  0  0  0           0  0  0
   -4.9414    2.2483    0.0000 C   0  0  0  0  0  0           0  0  0
  1  2  2  0     0  0
  1  3  1  0     0  0
  1  4  1  0     0  0
  2  5  1  0     0  0
  2  6  1  0     0  0
  3  7  2  0     0  0
  4  8  1  0     0  0
  5  9  2  0     0  0
  6 10  1  0     0  0
  7 11  1  0     0  0
 11 12  1  0     0  0
 11 13  2  0     0  0
 12 14  1  0     0  0
 14 15  1  0     0  0
 14 16  1  0     0  0
 15 17  1  0     0  0
 16 18  1  0     0  0
 16 19  2  0     0  0
 17 20  1  0     0  0
 17 21  1  0     0  0
  7  9  1  0     0  0
  8 10  1  0     0  0
M  END
>  <IDNUMBER>
BAS 02817829

>  <BOX>
1

>  <CELL>
C4

>  <WEIGHT>
10.0

>  <MOL_WEIGHT>
293.32

>  <STRUCT_FORMULA>
C15H19NO5

>  <VENDOR_LOT>
331639

$$$$

          08231011372D 1   1.00000     0.00000     0

 17 19  0     0  0            999 V2000
    0.8897   -0.0207    0.0000 C   0  0  0  0  0  0           0  0  0
    1.1724    0.4552    0.0000 C   0  0  0  0  0  0           0  0  0
    0.3379   -0.0069    0.0000 C   0  0  0  0  0  0           0  0  0
    1.2621   -0.4345    0.0000 O   0  0  0  0  0  0           0  0  0
    0.8897    0.9345    0.0000 C   0  0  0  0  0  0           0  0  0
    1.7138    0.3345    0.0000 O   0  0  0  0  0  0           0  0  0
    0.0621    0.4586    0.0000 C   0  0  0  0  0  0           0  0  0
    1.7621   -0.2069    0.0000 C   0  0  0  0  0  0           0  0  0
    0.3379    0.9345    0.0000 C   0  0  0  0  0  0           0  0  0
   -0.4897    0.4586    0.0000 C   0  0  0  0  0  0           0  0  0
   -0.7655   -0.0069    0.0000 C   0  0  0  0  0  0           0  0  0
   -1.3241   -0.0069    0.0000 C   0  0  0  0  0  0           0  0  0
   -0.6000   -0.5414    0.0000 S   0  0  0  0  0  0           0  0  0
   -1.4897   -0.5345    0.0000 N   0  0  0  0  0  0           0  0  0
   -1.6483    0.4345    0.0000 O   0  0  0  0  0  0           0  0  0
   -1.0483   -0.8448    0.0000 C   0  0  0  0  0  0           0  0  0
   -1.0552   -1.4034    0.0000 S   0  0  0  0  0  0           0  0  0
  1  2  2  0     0  0
  1  3  1  0     0  0
  1  4  1  0     0  0
  2  5  1  0     0  0
  2  6  1  0     0  0
  3  7  2  0     0  0
  4  8  1  0     0  0
  5  9  2  0     0  0
  7 10  1  0     0  0
 10 11  2  0     0  0
 11 12  1  0     0  0
 11 13  1  0     0  0
 12 14  1  0     0  0
 12 15  2  0     0  0
 13 16  1  0     0  0
 16 17  2  0     0  0
  6  8  1  0     0  0
  7  9  1  0     0  0
 14 16  1  0     0  0
M  END
>  <IDNUMBER>
BAS 00436587

>  <BOX>
1

>  <CELL>
C5

>  <WEIGHT>
10.0

>  <MOL_WEIGHT>
265.31

>  <STRUCT_FORMULA>
C11H7NO3S2

>  <VENDOR_LOT>
167217

$$$$

          08231011372D 1   1.00000     0.00000     0

 20 21  0     0  0            999 V2000
   -1.1207    0.4276    0.0000 C   0  0  0  0  0  0           0  0  0
   -1.3103   -0.4345    0.0000 C   0  0  0  0  0  0           0  0  0
   -0.2862    0.6931    0.0000 C   0  0  0  0  0  0           0  0  0
   -1.8000    1.0069    0.0000 C   0  0  0  0  0  0           0  0  0
   -2.1517   -0.7103    0.0000 C   0  0  0  0  0  0           0  0  0
    0.3793    0.0931    0.0000 N   0  0  0  0  0  0           0  0  0
   -2.6345    0.7276    0.0000 C   0  0  0  0  0  0           0  0  0
   -1.6517    1.8655    0.0000 O   0  0  0  0  0  0           0  0  0
   -2.8345   -0.1448    0.0000 C   0  0  0  0  0  0           0  0  0
   -2.3103   -1.5724    0.0000 N   0  3  0  0  0  0           0  0  0
    1.2897    0.3276    0.0000 C   0  0  0  0  0  0           0  0  0
   -1.6345   -2.1103    0.0000 O   0  0  0  0  0  0           0  0  0
   -3.1586   -1.8621    0.0000 O   0  5  0  0  0  0           0  0  0
    1.8793   -0.3069    0.0000 C   0  0  0  0  0  0           0  0  0
    1.5103    1.1655    0.0000 C   0  0  0  0  0  0           0  0  0
    2.7793   -0.1069    0.0000 C   0  0  0  0  0  0           0  0  0
    2.4103    1.4069    0.0000 C   0  0  0  0  0  0           0  0  0
    3.0000    0.7655    0.0000 C   0  0  0  0  0  0           0  0  0
    3.4000   -0.7241    0.0000 C   0  0  0  0  0  0           0  0  0
    4.2483   -0.5069    0.0000 O   0  0  0  0  0  0           0  0  0
  1  2  1  0     0  0
  1  3  1  0     0  0
  1  4  2  0     0  0
  2  5  2  0     0  0
  3  6  2  0     0  0
  4  7  1  0     0  0
  4  8  1  0     0  0
  5  9  1  0     0  0
  5 10  1  0     0  0
  6 11  1  0     0  0
 10 12  2  0     0  0
 10 13  1  0     0  0
 11 14  2  0     0  0
 11 15  1  0     0  0
 14 16  1  0     0  0
 15 17  2  0     0  0
 16 18  2  0     0  0
 16 19  1  0     0  0
 19 20  1  0     0  0
  7  9  2  0     0  0
 17 18  1  0     0  0
M  CHG  2  10   1  13  -1
M  END
>  <IDNUMBER>
BAS 00548736

>  <BOX>
1

>  <CELL>
C6

>  <WEIGHT>
10.0

>  <MOL_WEIGHT>
272.26

>  <STRUCT_FORMULA>
C14H12N2O4

>  <VENDOR_LOT>
160047

$$$$

          08231011372D 1   1.00000     0.00000     0

 22 24  0     0  0            999 V2000
    1.7862    0.5483    0.0000 C   0  0  0  0  0  0           0  0  0
    1.7862   -0.2724    0.0000 C   0  0  0  0  0  0           0  0  0
    1.0862    0.9621    0.0000 C   0  0  0  0  0  0           0  0  0
    2.5000    0.9621    0.0000 C   0  0  0  0  0  0           0  0  0
    1.0862   -0.6897    0.0000 C   0  0  0  0  0  0           0  0  0
    2.5000   -0.6897    0.0000 O   0  0  0  0  0  0           0  0  0
    0.3517    0.5483    0.0000 C   0  0  0  0  0  0           0  0  0
    3.2138    0.5483    0.0000 C   0  0  0  0  0  0           0  0  0
    2.4862    1.7759    0.0000 C   0  0  0  0  0  0           0  0  0
    0.3517   -0.2724    0.0000 C   0  0  0  0  0  0           0  0  0
    3.2138   -0.2724    0.0000 C   0  0  0  0  0  0           0  0  0
   -0.3655   -0.7034    0.0000 O   0  0  0  0  0  0           0  0  0
    3.9345   -0.7034    0.0000 O   0  0  0  0  0  0           0  0  0
   -1.0862   -0.2897    0.0000 C   0  0  0  0  0  0           0  0  0
   -1.7966   -0.7034    0.0000 C   0  0  0  0  0  0           0  0  0
   -2.4966   -0.2897    0.0000 C   0  0  0  0  0  0           0  0  0
   -1.7966   -1.5241    0.0000 O   0  0  0  0  0  0           0  0  0
   -3.2138   -0.7034    0.0000 C   0  0  0  0  0  0           0  0  0
   -2.4966    0.5483    0.0000 C   0  0  0  0  0  0           0  0  0
   -3.9241   -0.2897    0.0000 C   0  0  0  0  0  0           0  0  0
   -3.1966    0.9621    0.0000 C   0  0  0  0  0  0           0  0  0
   -3.9241    0.5483    0.0000 C   0  0  0  0  0  0           0  0  0
  1  2  2  0     0  0
  1  3  1  0     0  0
  1  4  1  0     0  0
  2  5  1  0     0  0
  2  6  1  0     0  0
  3  7  2  0     0  0
  4  8  2  0     0  0
  4  9  1  0     0  0
  5 10  2  0     0  0
  6 11  1  0     0  0
 10 12  1  0     0  0
 11 13  2  0     0  0
 12 14  1  0     0  0
 14 15  1  0     0  0
 15 16  1  0     0  0
 15 17  2  0     0  0
 16 18  1  0     0  0
 16 19  2  0     0  0
 18 20  2  0     0  0
 19 21  1  0     0  0
 20 22  1  0     0  0
  7 10  1  0     0  0
  8 11  1  0     0  0
 21 22  2  0     0  0
M  END
>  <IDNUMBER>
BAS 03108620

>  <BOX>
1

>  <CELL>
C7

>  <WEIGHT>
10.0

>  <MOL_WEIGHT>
294.30

>  <STRUCT_FORMULA>
C18H14O4

>  <VENDOR_LOT>
287446

$$$$

          08231011372D 1   1.00000     0.00000     0

 22 24  0     0  0            999 V2000
   -0.6310    0.5828    0.0000 C   0  0  0  0  0  0           0  0  0
   -0.2103    0.8207    0.0000 C   0  0  0  0  0  0           0  0  0
   -0.6310    0.0828    0.0000 N   0  0  0  0  0  0           0  0  0
   -1.0517    0.8207    0.0000 C   0  0  0  0  0  0           0  0  0
    0.2069    0.5621    0.0000 C   0  0  0  0  0  0           0  0  0
   -0.2103    1.3000    0.0000 C   0  0  0  0  0  0           0  0  0
   -0.2103   -0.1586    0.0000 C   0  0  0  0  0  0           0  0  0
   -1.0517    1.3000    0.0000 C   0  0  0  0  0  0           0  0  0
   -1.4931    0.6000    0.0000 C   0  0  0  0  0  0           0  0  0
    0.2069    0.0828    0.0000 N   0  0  0  0  0  0           0  0  0
    0.6690    0.8000    0.0000 C   0  0  0  0  0  0           0  0  0
   -0.6310    1.5414    0.0000 C   0  0  0  0  0  0           0  0  0
   -0.2103   -0.6586    0.0000 N   0  0  0  0  0  0           0  0  0
   -0.6310    2.0414    0.0000 C   0  0  0  0  0  0           0  0  0
    0.2069   -0.9000    0.0000 C   0  0  0  0  0  0           0  0  0
    0.2000   -1.3793    0.0000 N   0  0  0  0  0  0           0  0  0
    0.6414   -0.6655    0.0000 N   0  0  0  0  0  0           0  0  0
    0.6069   -1.6379    0.0000 C   0  0  0  0  0  0           0  0  0
    1.0552   -0.9069    0.0000 C   0  0  0  0  0  0           0  0  0
    1.0414   -1.4000    0.0000 C   0  0  0  0  0  0           0  0  0
    0.6276   -2.1379    0.0000 C   0  0  0  0  0  0           0  0  0
    1.5000   -0.6862    0.0000 O   0  0  0  0  0  0           0  0  0
  1  2  2  0     0  0
  1  3  1  0     0  0
  1  4  1  0     0  0
  2  5  1  0     0  0
  2  6  1  0     0  0
  3  7  2  0     0  0
  4  8  2  0     0  0
  4  9  1  0     0  0
  5 10  2  0     0  0
  5 11  1  0     0  0
  6 12  2  0     0  0
  7 13  1  0     0  0
 12 14  1  0     0  0
 13 15  1  0     0  0
 15 16  2  0     0  0
 15 17  1  0     0  0
 16 18  1  0     0  0
 17 19  2  0     0  0
 18 20  2  0     0  0
 18 21  1  0     0  0
 19 22  1  0     0  0
  7 10  1  0     0  0
  8 12  1  0     0  0
 19 20  1  0     0  0
M  END
>  <IDNUMBER>
BAS 01045023

>  <BOX>
1

>  <CELL>
C8

>  <WEIGHT>
10.0

>  <MOL_WEIGHT>
295.34

>  <STRUCT_FORMULA>
C16H17N5O

>  <VENDOR_LOT>
2359

$$$$

          08231011372D 1   1.00000     0.00000     0

 20 21  0     0  0            999 V2000
   -0.7966    0.7724    0.0000 C   0  0  0  0  0  0           0  0  0
    0.6379    0.7690    0.0000 N   0  0  3  0  0  0           0  0  0
   -0.7966   -0.0517    0.0000 C   0  0  0  0  0  0           0  0  0
   -1.5069    1.1931    0.0000 C   0  0  0  0  0  0           0  0  0
    0.6414   -0.0448    0.0000 C   0  0  0  0  0  0           0  0  0
    1.2241    1.3483    0.0000 C   0  0  3  0  0  0           0  0  0
   -0.0828   -0.4586    0.0000 N   0  0  0  0  0  0           0  0  0
   -1.5069   -0.4586    0.0000 N   0  0  3  0  0  0           0  0  0
   -2.2138    0.7724    0.0000 N   0  0  0  0  0  0           0  0  0
   -1.5069    2.0172    0.0000 O   0  0  0  0  0  0           0  0  0
    1.3483   -0.4690    0.0000 S   0  0  0  0  0  0           0  0  0
    2.0172    1.1310    0.0000 C   0  0  0  0  0  0           0  0  0
    1.0138    2.1483    0.0000 C   0  0  0  0  0  0           0  0  0
   -2.2138   -0.0517    0.0000 C   0  0  0  0  0  0           0  0  0
   -1.5000   -1.2828    0.0000 C   0  0  0  0  0  0           0  0  0
    1.3379   -1.2931    0.0000 C   0  0  0  0  0  0           0  0  0
   -2.9345   -0.4655    0.0000 O   0  0  0  0  0  0           0  0  0
    2.0414   -1.7172    0.0000 C   0  0  0  0  0  0           0  0  0
    2.7552   -1.3069    0.0000 N   0  0  0  0  0  0           0  0  0
    2.0414   -2.5448    0.0000 O   0  0  0  0  0  0           0  0  0
  1  2  1  0     0  0
  1  3  2  0     0  0
  1  4  1  0     0  0
  2  5  1  0     0  0
  2  6  1  0     0  0
  3  7  1  0     0  0
  3  8  1  0     0  0
  4  9  1  0     0  0
  4 10  2  0     0  0
  5 11  1  0     0  0
  6 12  1  0     0  0
  6 13  1  0     0  0
  8 14  1  0     0  0
  8 15  1  0     0  0
 11 16  1  0     0  0
 14 17  2  0     0  0
 16 18  1  0     0  0
 18 19  1  0     0  0
 18 20  2  0     0  0
  5  7  2  0     0  0
  9 14  1  0     0  0
M  END
>  <IDNUMBER>
BAS 00552989

>  <BOX>
1

>  <CELL>
C9

>  <WEIGHT>
10.0

>  <MOL_WEIGHT>
297.34

>  <STRUCT_FORMULA>
C11H15N5O3S

>  <VENDOR_LOT>
116810

$$$$

          08231011372D 1   1.00000     0.00000     0

 19 20  0     0  0            999 V2000
    0.1759   -0.5862    0.0000 C   0  0  0  0  0  0           0  0  0
    0.1759   -1.5655    0.0000 C   0  0  0  0  0  0           0  0  0
    1.1069   -0.2862    0.0000 N   0  0  3  0  0  0           0  0  0
   -0.6759   -0.0862    0.0000 C   0  0  0  0  0  0           0  0  0
    1.1069   -1.8655    0.0000 N   0  0  0  0  0  0           0  0  0
   -0.6759   -2.0552    0.0000 N   0  0  3  0  0  0           0  0  0
    1.6759   -1.0862    0.0000 C   0  0  0  0  0  0           0  0  0
    1.4172    0.6621    0.0000 C   0  0  0  0  0  0           0  0  0
   -1.5241   -0.5862    0.0000 N   0  0  3  0  0  0           0  0  0
   -0.6759    0.8931    0.0000 O   0  0  0  0  0  0           0  0  0
   -1.5241   -1.5655    0.0000 C   0  0  0  0  0  0           0  0  0
   -0.6759   -3.0483    0.0000 C   0  0  0  0  0  0           0  0  0
    0.7552    1.4034    0.0000 C   0  0  0  0  0  0           0  0  0
   -2.3931   -0.0759    0.0000 C   0  0  0  0  0  0           0  0  0
   -2.3931   -2.0655    0.0000 O   0  0  0  0  0  0           0  0  0
    1.0552    2.3345    0.0000 C   0  0  0  0  0  0           0  0  0
    0.3862    3.0621    0.0000 N   0  0  0  0  0  0           0  0  0
    2.0069    2.5345    0.0000 O   0  0  0  0  0  0           0  0  0
    0.6759    3.9931    0.0000 N   0  0  0  0  0  0           0  0  0
  1  2  2  0     0  0
  1  3  1  0     0  0
  1  4  1  0     0  0
  2  5  1  0     0  0
  2  6  1  0     0  0
  3  7  1  0     0  0
  3  8  1  0     0  0
  4  9  1  0     0  0
  4 10  2  0     0  0
  6 11  1  0     0  0
  6 12  1  0     0  0
  8 13  1  0     0  0
  9 14  1  0     0  0
 11 15  2  0     0  0
 13 16  1  0     0  0
 16 17  1  0     0  0
 16 18  2  0     0  0
 17 19  1  0     0  0
  5  7  2  0     0  0
  9 11  1  0     0  0
M  END
>  <IDNUMBER>
BAS 01579163

>  <BOX>
1

>  <CELL>
C10

>  <WEIGHT>
10.0

>  <MOL_WEIGHT>
266.26

>  <STRUCT_FORMULA>
C10H14N6O3

>  <VENDOR_LOT>
221536

$$$$

          08231011372D 1   1.00000     0.00000     0

 20 21  0     0  0            999 V2000
    0.0862    0.3379    0.0000 C   0  0  3  0  0  0           0  0  0
    0.0966   -0.6103    0.0000 C   0  0  0  0  0  0           0  0  0
   -0.7276    0.7897    0.0000 C   0  0  0  0  0  0           0  0  0
    0.8862    0.8138    0.0000 C   0  0  0  0  0  0           0  0  0
   -0.7138   -1.0862    0.0000 C   0  0  0  0  0  0           0  0  0
    0.9069   -1.0862    0.0000 C   0  0  0  0  0  0           0  0  0
   -0.7310    1.7379    0.0000 C   0  0  0  0  0  0           0  0  0
   -1.5448    0.2759    0.0000 C   0  0  0  0  0  0           0  0  0
    0.8724    1.7552    0.0000 C   0  0  0  0  0  0           0  0  0
    1.7069    0.3517    0.0000 C   0  0  0  0  0  0           0  0  0
   -0.7138   -2.0069    0.0000 C   0  0  0  0  0  0           0  0  0
    0.9069   -2.0069    0.0000 C   0  0  0  0  0  0           0  0  0
    0.0552    2.2276    0.0000 O   0  0  0  0  0  0           0  0  0
   -1.5828    2.1759    0.0000 C   0  0  0  0  0  0           0  0  0
   -2.3759    0.7414    0.0000 C   0  0  0  0  0  0           0  0  0
   -1.5276   -0.6621    0.0000 O   0  0  0  0  0  0           0  0  0
    1.6966    2.2276    0.0000 N   0  0  0  0  0  0           0  0  0
    2.5069   -0.1069    0.0000 N   0  0  0  0  0  0           0  0  0
    0.0966   -2.4724    0.0000 C   0  0  0  0  0  0           0  0  0
    0.0966   -3.3931    0.0000 O   0  0  0  0  0  0           0  0  0
  1  2  1  0     0  0
  1  3  1  0     0  0
  1  4  1  0     0  0
  2  5  2  0     0  0
  2  6  1  0     0  0
  3  7  2  0     0  0
  3  8  1  0     0  0
  4  9  2  0     0  0
  4 10  1  0     0  0
  5 11  1  0     0  0
  6 12  2  0     0  0
  7 13  1  0     0  0
  7 14  1  0     0  0
  8 15  1  0     0  0
  8 16  2  0     0  0
  9 17  1  0     0  0
 10 18  3  0     0  0
 11 19  2  0     0  0
 19 20  1  0     0  0
  9 13  1  0     0  0
 12 19  1  0     0  0
M  END
>  <IDNUMBER>
BAS 01060138

>  <BOX>
1

>  <CELL>
C11

>  <WEIGHT>
10.0

>  <MOL_WEIGHT>
270.29

>  <STRUCT_FORMULA>
C15H14N2O3

>  <VENDOR_LOT>
93811

$$$$

          08231011372D 1   1.00000     0.00000     0

 14 15  0     0  0            999 V2000
   -0.6931   -0.7138    0.0000 C   0  0  0  0  0  0           0  0  0
   -0.7034    0.7207    0.0000 C   0  0  0  0  0  0           0  0  0
    0.5276   -1.4379    0.0000 C   0  0  0  0  0  0           0  0  0
   -1.9414   -1.4379    0.0000 C   0  0  0  0  0  0           0  0  0
    0.5414    1.4414    0.0000 C   0  0  0  0  0  0           0  0  0
   -1.9483    1.4414    0.0000 C   0  0  0  0  0  0           0  0  0
    1.7759   -0.7276    0.0000 C   0  0  0  0  0  0           0  0  0
    0.5310   -2.6345    0.0000 O   0  0  0  0  0  0           0  0  0
   -3.1931   -0.7172    0.0000 C   0  0  0  0  0  0           0  0  0
    1.7828    0.7103    0.0000 C   0  0  0  0  0  0           0  0  0
    0.5414    2.6379    0.0000 O   0  0  0  0  0  0           0  0  0
   -3.1931    0.7207    0.0000 C   0  0  0  0  0  0           0  0  0
    2.9828   -1.4241    0.0000 N   0  0  0  0  0  0           0  0  0
    2.9897    1.4207    0.0000 S   0  0  0  0  0  0           0  0  0
  1  2  2  0     0  0
  1  3  1  0     0  0
  1  4  1  0     0  0
  2  5  1  0     0  0
  2  6  1  0     0  0
  3  7  1  0     0  0
  3  8  2  0     0  0
  4  9  2  0     0  0
  5 10  1  0     0  0
  5 11  2  0     0  0
  6 12  2  0     0  0
  7 13  1  0     0  0
 10 14  1  0     0  0
  7 10  2  0     0  0
  9 12  1  0     0  0
M  END
>  <IDNUMBER>
BAS 01121591

>  <BOX>
1

>  <CELL>
C12

>  <WEIGHT>
10.0

>  <MOL_WEIGHT>
205.24

>  <STRUCT_FORMULA>
C10H7NO2S

>  <VENDOR_LOT>
153493

$$$$

          08231011372D 1   1.00000     0.00000     0

 20 21  0     0  0            999 V2000
   -1.1345    1.1138    0.0000 C   0  0  0  0  0  0           0  0  0
   -0.3034    1.1103    0.0000 C   0  0  0  0  0  0           0  0  0
   -1.6138    1.7897    0.0000 C   0  0  0  0  0  0           0  0  0
   -1.6241    0.4483    0.0000 O   0  0  0  0  0  0           0  0  0
    0.1000    0.3966    0.0000 N   0  0  0  0  0  0           0  0  0
    0.1000    1.8241    0.0000 O   0  0  0  0  0  0           0  0  0
   -2.4000    1.5345    0.0000 C   0  0  0  0  0  0           0  0  0
   -2.4034    0.7103    0.0000 C   0  0  0  0  0  0           0  0  0
    0.9241    0.4034    0.0000 C   0  0  0  0  0  0           0  0  0
    1.3379   -0.3034    0.0000 C   0  0  0  0  0  0           0  0  0
    1.3345    1.1207    0.0000 C   0  0  0  0  0  0           0  0  0
    0.9138   -0.9897    0.0000 C   0  0  0  0  0  0           0  0  0
    2.1586    1.1241    0.0000 N   0  0  0  0  0  0           0  0  0
    0.9172    1.8310    0.0000 O   0  0  0  0  0  0           0  0  0
    0.1138   -0.9655    0.0000 C   0  0  0  0  0  0           0  0  0
    1.3000   -1.6931    0.0000 C   0  0  0  0  0  0           0  0  0
   -0.3069   -1.6552    0.0000 C   0  0  0  0  0  0           0  0  0
    0.8828   -2.3759    0.0000 C   0  0  0  0  0  0           0  0  0
    0.0724   -2.3586    0.0000 C   0  0  0  0  0  0           0  0  0
   -0.3621   -3.0655    0.0000 O   0  0  0  0  0  0           0  0  0
  1  2  1  0     0  0
  1  3  2  0     0  0
  1  4  1  0     0  0
  2  5  1  0     0  0
  2  6  2  0     0  0
  3  7  1  0     0  0
  4  8  1  0     0  0
  5  9  1  0     0  0
  9 10  2  0     0  0
  9 11  1  0     0  0
 10 12  1  0     0  0
 11 13  1  0     0  0
 11 14  2  0     0  0
 12 15  2  0     0  0
 12 16  1  0     0  0
 15 17  1  0     0  0
 16 18  2  0     0  0
 17 19  2  0     0  0
 19 20  1  0     0  0
  7  8  2  0     0  0
 18 19  1  0     0  0
M  END
>  <IDNUMBER>
BAS 02082311

>  <BOX>
1

>  <CELL>
D1

>  <WEIGHT>
10.0

>  <MOL_WEIGHT>
272.26

>  <STRUCT_FORMULA>
C14H12N2O4

>  <VENDOR_LOT>
253099

$$$$

          08231011372D 1   1.00000     0.00000     0

 19 20  0     0  0            999 V2000
   -0.8103   -0.5345    0.0000 C   0  0  0  0  0  0           0  0  0
   -1.0241    0.1414    0.0000 C   0  0  0  0  0  0           0  0  0
   -0.1207   -0.6828    0.0000 N   0  0  0  0  0  0           0  0  0
   -1.3897   -0.9448    0.0000 S   0  0  0  0  0  0           0  0  0
   -0.5586    0.6690    0.0000 C   0  0  0  0  0  0           0  0  0
   -1.7241    0.1552    0.0000 C   0  0  0  0  0  0           0  0  0
    0.3552   -0.1586    0.0000 C   0  0  0  0  0  0           0  0  0
   -1.9448   -0.5310    0.0000 C   0  0  0  0  0  0           0  0  0
    0.1414    0.5345    0.0000 N   0  0  3  0  0  0           0  0  0
   -0.7759    1.3655    0.0000 O   0  0  0  0  0  0           0  0  0
   -2.1448    0.7414    0.0000 C   0  0  0  0  0  0           0  0  0
    1.0759   -0.3172    0.0000 C   0  0  0  0  0  0           0  0  0
   -2.6448   -0.7586    0.0000 C   0  0  0  0  0  0           0  0  0
    0.6241    1.0690    0.0000 N   0  0  0  0  0  0           0  0  0
    1.5414    0.2207    0.0000 C   0  0  0  0  0  0           0  0  0
    2.2276    0.0931    0.0000 C   0  0  0  0  0  0           0  0  0
    2.4759   -0.5793    0.0000 N   0  0  0  0  0  0           0  0  0
    2.6897    0.6345    0.0000 O   0  0  0  0  0  0           0  0  0
    2.0103   -1.1172    0.0000 N   0  0  0  0  0  0           0  0  0
  1  2  2  0     0  0
  1  3  1  0     0  0
  1  4  1  0     0  0
  2  5  1  0     0  0
  2  6  1  0     0  0
  3  7  2  0     0  0
  4  8  1  0     0  0
  5  9  1  0     0  0
  5 10  2  0     0  0
  6 11  1  0     0  0
  7 12  1  0     0  0
  8 13  1  0     0  0
  9 14  1  0     0  0
 12 15  1  0     0  0
 15 16  1  0     0  0
 16 17  1  0     0  0
 16 18  2  0     0  0
 17 19  1  0     0  0
  6  8  2  0     0  0
  7  9  1  0     0  0
M  END
>  <IDNUMBER>
BAS 01022365

>  <BOX>
1

>  <CELL>
D2

>  <WEIGHT>
10.0

>  <MOL_WEIGHT>
281.34

>  <STRUCT_FORMULA>
C11H15N5O2S

>  <VENDOR_LOT>
222310

$$$$

          08231011372D 1   1.00000     0.00000     0

 19 21  0     0  0            999 V2000
   -0.2724   -0.0483    0.0000 C   0  0  3  0  0  0           0  0  0
    0.8276   -0.6862    0.0000 C   0  0  0  0  0  0           0  0  0
   -0.2724    1.2517    0.0000 C   0  0  0  0  0  0           0  0  0
   -1.3931   -0.6862    0.0000 C   0  0  0  0  0  0           0  0  0
    0.8276   -1.9690    0.0000 C   0  0  0  0  0  0           0  0  0
    2.0276   -0.2862    0.0000 C   0  0  0  0  0  0           0  0  0
    0.8276    1.8931    0.0000 C   0  0  0  0  0  0           0  0  0
   -1.2345    2.0931    0.0000 C   0  0  0  0  0  0           0  0  0
   -1.3931   -1.9690    0.0000 C   0  0  0  0  0  0           0  0  0
   -2.5345   -0.0276    0.0000 C   0  0  0  0  0  0           0  0  0
   -0.2724   -2.6069    0.0000 O   0  0  0  0  0  0           0  0  0
    2.0276   -2.3483    0.0000 N   0  0  0  0  0  0           0  0  0
    2.7655   -1.3069    0.0000 N   0  0  0  0  0  0           0  0  0
    2.4448    0.9310    0.0000 C   0  0  0  0  0  0           0  0  0
    0.5448    3.1310    0.0000 S   0  0  0  0  0  0           0  0  0
    2.0069    1.3724    0.0000 C   0  0  0  0  0  0           0  0  0
   -0.7345    3.2517    0.0000 C   0  0  0  0  0  0           0  0  0
   -2.5345   -2.6069    0.0000 N   0  0  0  0  0  0           0  0  0
   -3.6552    0.6138    0.0000 N   0  0  0  0  0  0           0  0  0
  1  2  1  0     0  0
  1  3  1  0     0  0
  1  4  1  0     0  0
  2  5  2  0     0  0
  2  6  1  0     0  0
  3  7  2  0     0  0
  3  8  1  0     0  0
  4  9  2  0     0  0
  4 10  1  0     0  0
  5 11  1  0     0  0
  5 12  1  0     0  0
  6 13  2  0     0  0
  6 14  1  0     0  0
  7 15  1  0     0  0
  7 16  1  0     0  0
  8 17  2  0     0  0
  9 18  1  0     0  0
 10 19  3  0     0  0
  9 11  1  0     0  0
 12 13  1  0     0  0
 15 17  1  0     0  0
M  END
>  <IDNUMBER>
BAS 01127174

>  <BOX>
1

>  <CELL>
D3

>  <WEIGHT>
10.0

>  <MOL_WEIGHT>
272.33

>  <STRUCT_FORMULA>
C13H12N4OS

>  <VENDOR_LOT>
32869

$$$$

          08231011372D 1   1.00000     0.00000     0

 20 21  0     0  0            999 V2000
   -1.6724    1.0552    0.0000 C   0  0  0  0  0  0           0  0  0
   -1.6724    0.1310    0.0000 C   0  0  0  0  0  0           0  0  0
   -0.8000    1.3310    0.0000 C   0  0  0  0  0  0           0  0  0
   -2.4586    1.5207    0.0000 C   0  0  0  0  0  0           0  0  0
   -0.8000   -0.1448    0.0000 C   0  0  0  0  0  0           0  0  0
   -2.4586   -0.3276    0.0000 C   0  0  0  0  0  0           0  0  0
   -0.2724    0.5828    0.0000 N   0  0  3  0  0  0           0  0  0
   -0.5103    2.2103    0.0000 O   0  0  0  0  0  0           0  0  0
   -3.2586    1.0552    0.0000 C   0  0  0  0  0  0           0  0  0
   -0.5103   -1.0276    0.0000 O   0  0  0  0  0  0           0  0  0
   -3.2586    0.1310    0.0000 C   0  0  0  0  0  0           0  0  0
    0.6483    0.5724    0.0000 C   0  0  0  0  0  0           0  0  0
   -4.0724    1.5241    0.0000 F   0  0  0  0  0  0           0  0  0
    1.1103   -0.2172    0.0000 C   0  0  0  0  0  0           0  0  0
    2.0276   -0.2172    0.0000 C   0  0  0  0  0  0           0  0  0
    2.4897   -1.0069    0.0000 C   0  0  0  0  0  0           0  0  0
    3.4103   -1.0069    0.0000 C   0  0  0  0  0  0           0  0  0
    3.8655   -1.7931    0.0000 C   0  0  0  0  0  0           0  0  0
    3.4103   -2.5897    0.0000 O   0  0  0  0  0  0           0  0  0
    4.7897   -1.7931    0.0000 O   0  0  0  0  0  0           0  0  0
  1  2  2  0     0  0
  1  3  1  0     0  0
  1  4  1  0     0  0
  2  5  1  0     0  0
  2  6  1  0     0  0
  3  7  1  0     0  0
  3  8  2  0     0  0
  4  9  2  0     0  0
  5 10  2  0     0  0
  6 11  2  0     0  0
  7 12  1  0     0  0
  9 13  1  0     0  0
 12 14  1  0     0  0
 14 15  1  0     0  0
 15 16  1  0     0  0
 16 17  1  0     0  0
 17 18  1  0     0  0
 18 19  1  0     0  0
 18 20  2  0     0  0
  5  7  1  0     0  0
  9 11  1  0     0  0
M  END
>  <IDNUMBER>
BAS 00031021

>  <BOX>
1

>  <CELL>
D4

>  <WEIGHT>
10.0

>  <MOL_WEIGHT>
279.27

>  <STRUCT_FORMULA>
C14H14FNO4

>  <VENDOR_LOT>
178636

$$$$

          08231011372D 1   1.00000     0.00000     0

 18 19  0     0  0            999 V2000
    0.2586   -0.4621    0.0000 C   0  0  0  0  0  0           0  0  0
    0.8828   -0.0897    0.0000 C   0  0  0  0  0  0           0  0  0
   -0.3724   -0.0897    0.0000 C   0  0  0  0  0  0           0  0  0
    0.2586   -1.1793    0.0000 C   0  0  0  0  0  0           0  0  0
    0.8828    0.6379    0.0000 C   0  0  0  0  0  0           0  0  0
   -1.0034   -0.4621    0.0000 C   0  0  0  0  0  0           0  0  0
   -0.3724   -1.5552    0.0000 C   0  0  0  0  0  0           0  0  0
    0.3586    1.1207    0.0000 S   0  0  0  0  0  0           0  0  0
    1.5069    0.9966    0.0000 C   0  0  0  0  0  0           0  0  0
   -1.0034   -1.1793    0.0000 C   0  0  0  0  0  0           0  0  0
   -1.6414   -0.0793    0.0000 O   0  0  0  0  0  0           0  0  0
   -0.3724   -2.2759    0.0000 Cl  0  0  0  0  0  0           0  0  0
    0.6586    1.7724    0.0000 C   0  0  0  0  0  0           0  0  0
    1.3586    1.7103    0.0000 N   0  0  0  0  0  0           0  0  0
    2.1793    0.7103    0.0000 O   0  0  0  0  0  0           0  0  0
   -1.6414   -1.5552    0.0000 O   0  0  0  0  0  0           0  0  0
   -2.2724   -0.4414    0.0000 C   0  0  0  0  0  0           0  0  0
    0.3276    2.4207    0.0000 N   0  0  0  0  0  0           0  0  0
  1  2  1  0     0  0
  1  3  1  0     0  0
  1  4  2  0     0  0
  2  5  2  0     0  0
  3  6  2  0     0  0
  4  7  1  0     0  0
  5  8  1  0     0  0
  5  9  1  0     0  0
  6 10  1  0     0  0
  6 11  1  0     0  0
  7 12  1  0     0  0
  8 13  1  0     0  0
  9 14  1  0     0  0
  9 15  2  0     0  0
 10 16  1  0     0  0
 11 17  1  0     0  0
 13 18  2  0     0  0
  7 10  2  0     0  0
 13 14  1  0     0  0
M  END
>  <IDNUMBER>
BAS 00336309

>  <BOX>
1

>  <CELL>
D5

>  <WEIGHT>
10.0

>  <MOL_WEIGHT>
284.72

>  <STRUCT_FORMULA>
C11H9ClN2O3S

>  <VENDOR_LOT>
123188

$$$$

          08231011372D 1   1.00000     0.00000     0

 18 19  0     0  0            999 V2000
   -1.3000   -0.3621    0.0000 C   0  0  0  0  0  0           0  0  0
   -1.3000    0.5000    0.0000 C   0  0  0  0  0  0           0  0  0
   -0.5483   -0.8000    0.0000 N   0  0  0  0  0  0           0  0  0
   -2.0483   -0.8000    0.0000 C   0  0  0  0  0  0           0  0  0
   -0.5483    0.9310    0.0000 C   0  0  0  0  0  0           0  0  0
   -2.0483    0.9310    0.0000 C   0  0  0  0  0  0           0  0  0
    0.2138   -0.3621    0.0000 C   0  0  0  0  0  0           0  0  0
   -2.8000   -0.3621    0.0000 C   0  0  0  0  0  0           0  0  0
    0.2138    0.5000    0.0000 N   0  0  3  0  0  0           0  0  0
   -0.5483    1.7897    0.0000 O   0  0  0  0  0  0           0  0  0
   -2.8000    0.4897    0.0000 C   0  0  0  0  0  0           0  0  0
    0.9621   -0.7793    0.0000 S   0  0  0  0  0  0           0  0  0
    0.9724    0.9103    0.0000 C   0  0  0  0  0  0           0  0  0
    1.7000   -0.3414    0.0000 C   0  0  0  0  0  0           0  0  0
    1.7138    0.4586    0.0000 C   0  0  0  0  0  0           0  0  0
    2.4724   -0.7621    0.0000 C   0  0  0  0  0  0           0  0  0
    3.2138   -0.3103    0.0000 N   0  0  0  0  0  0           0  0  0
    2.4931   -1.6276    0.0000 O   0  0  0  0  0  0           0  0  0
  1  2  1  0     0  0
  1  3  1  0     0  0
  1  4  2  0     0  0
  2  5  1  0     0  0
  2  6  2  0     0  0
  3  7  2  0     0  0
  4  8  1  0     0  0
  5  9  1  0     0  0
  5 10  2  0     0  0
  6 11  1  0     0  0
  7 12  1  0     0  0
  9 13  1  0     0  0
 12 14  1  0     0  0
 13 15  1  0     0  0
 14 16  1  0     0  0
 16 17  1  0     0  0
 16 18  2  0     0  0
  7  9  1  0     0  0
  8 11  2  0     0  0
M  END
>  <IDNUMBER>
BAS 02914412

>  <BOX>
1

>  <CELL>
D6

>  <WEIGHT>
10.0

>  <MOL_WEIGHT>
263.32

>  <STRUCT_FORMULA>
C12H13N3O2S

>  <VENDOR_LOT>
267197

$$$$

          08231011372D 1   1.00000     0.00000     0

 20 21  0     0  0            999 V2000
   -0.7379    0.4897    0.0000 N   0  0  3  0  0  0           0  0  0
   -0.1966    0.9345    0.0000 C   0  0  0  0  0  0           0  0  0
   -0.6586   -0.1655    0.0000 C   0  0  0  0  0  0           0  0  0
   -1.3586    0.7517    0.0000 C   0  0  0  0  0  0           0  0  0
    0.4414    0.6724    0.0000 C   0  0  0  0  0  0           0  0  0
   -1.1966   -0.5655    0.0000 N   0  0  0  0  0  0           0  0  0
   -0.0207   -0.4276    0.0000 O   0  0  0  0  0  0           0  0  0
   -1.8966    0.3517    0.0000 C   0  0  0  0  0  0           0  0  0
    0.5414    0.0103    0.0000 C   0  0  0  0  0  0           0  0  0
    0.9621    1.0897    0.0000 C   0  0  0  0  0  0           0  0  0
   -1.8207   -0.3103    0.0000 C   0  0  0  0  0  0           0  0  0
   -2.5207    0.6103    0.0000 F   0  0  0  0  0  0           0  0  0
    1.1793   -0.2483    0.0000 C   0  0  0  0  0  0           0  0  0
    1.6034    0.8586    0.0000 C   0  0  0  0  0  0           0  0  0
   -2.3759   -0.7103    0.0000 O   0  0  0  0  0  0           0  0  0
    1.7241    0.1724    0.0000 C   0  0  0  0  0  0           0  0  0
    1.2793   -0.9276    0.0000 N   0  3  0  0  0  0           0  0  0
    2.3793   -0.0655    0.0000 O   0  0  0  0  0  0           0  0  0
    1.9241   -1.1897    0.0000 O   0  0  0  0  0  0           0  0  0
    0.7414   -1.3276    0.0000 O   0  5  0  0  0  0           0  0  0
  1  2  1  0     0  0
  1  3  1  0     0  0
  1  4  1  0     0  0
  2  5  1  0     0  0
  3  6  1  0     0  0
  3  7  2  0     0  0
  4  8  2  0     0  0
  5  9  2  0     0  0
  5 10  1  0     0  0
  6 11  1  0     0  0
  8 12  1  0     0  0
  9 13  1  0     0  0
 10 14  2  0     0  0
 11 15  2  0     0  0
 13 16  2  0     0  0
 13 17  1  0     0  0
 16 18  1  0     0  0
 17 19  2  0     0  0
 17 20  1  0     0  0
  8 11  1  0     0  0
 14 16  1  0     0  0
M  CHG  2  17   1  20  -1
M  END
>  <IDNUMBER>
BAS 00386329

>  <BOX>
1

>  <CELL>
D7

>  <WEIGHT>
10.0

>  <MOL_WEIGHT>
281.20

>  <STRUCT_FORMULA>
C11H8FN3O5

>  <VENDOR_LOT>
79826

$$$$

          08231011372D 1   1.00000     0.00000     0

 21 23  0     0  0            999 V2000
    3.4345   -0.7517    0.0000 C   0  0  0  0  0  0           0  0  0
    3.4345   -1.8103    0.0000 C   0  0  0  0  0  0           0  0  0
    2.5138   -0.2207    0.0000 C   0  0  0  0  0  0           0  0  0
    4.4517   -0.4207    0.0000 O   0  0  0  0  0  0           0  0  0
    2.5138   -2.3517    0.0000 C   0  0  0  0  0  0           0  0  0
    4.4517   -2.1517    0.0000 O   0  0  0  0  0  0           0  0  0
    1.5828   -0.7517    0.0000 C   0  0  0  0  0  0           0  0  0
    5.0724   -1.2931    0.0000 C   0  0  0  0  0  0           0  0  0
    1.5828   -1.8103    0.0000 C   0  0  0  0  0  0           0  0  0
    0.4345   -0.2621    0.0000 C   0  0  0  0  0  0           0  0  0
   -0.6483   -0.2621    0.0000 N   0  0  0  0  0  0           0  0  0
    0.6931    0.8276    0.0000 O   0  0  0  0  0  0           0  0  0
   -1.6069    0.2793    0.0000 C   0  0  0  0  0  0           0  0  0
   -1.6276    1.3897    0.0000 C   0  0  0  0  0  0           0  0  0
   -2.5483   -0.2621    0.0000 C   0  0  0  0  0  0           0  0  0
   -2.5483    1.8966    0.0000 C   0  0  0  0  0  0           0  0  0
   -3.4862    0.2793    0.0000 C   0  0  0  0  0  0           0  0  0
   -3.4862    1.3586    0.0000 C   0  0  0  0  0  0           0  0  0
   -4.4276    1.9276    0.0000 C   0  0  0  0  0  0           0  0  0
   -5.3862    1.3897    0.0000 N   0  0  0  0  0  0           0  0  0
   -4.4069    3.0069    0.0000 O   0  0  0  0  0  0           0  0  0
  1  2  2  0     0  0
  1  3  1  0     0  0
  1  4  1  0     0  0
  2  5  1  0     0  0
  2  6  1  0     0  0
  3  7  2  0     0  0
  4  8  1  0     0  0
  5  9  2  0     0  0
  7 10  1  0     0  0
 10 11  1  0     0  0
 10 12  2  0     0  0
 11 13  1  0     0  0
 13 14  2  0     0  0
 13 15  1  0     0  0
 14 16  1  0     0  0
 15 17  2  0     0  0
 16 18  2  0     0  0
 18 19  1  0     0  0
 19 20  1  0     0  0
 19 21  2  0     0  0
  6  8  1  0     0  0
  7  9  1  0     0  0
 17 18  1  0     0  0
M  END
>  <IDNUMBER>
BAS 02065136

>  <BOX>
1

>  <CELL>
D8

>  <WEIGHT>
10.0

>  <MOL_WEIGHT>
284.27

>  <STRUCT_FORMULA>
C15H12N2O4

>  <VENDOR_LOT>
308010

$$$$

          08231011372D 1   1.00000     0.00000     0

 20 21  0     0  0            999 V2000
    1.3207    0.0828    0.0000 C   0  0  0  0  0  0           0  0  0
    0.8586    0.8690    0.0000 N   0  0  0  0  0  0           0  0  0
    0.8586   -0.7172    0.0000 C   0  0  0  0  0  0           0  0  0
    2.2586    0.0828    0.0000 C   0  0  0  0  0  0           0  0  0
   -0.0621    0.8690    0.0000 C   0  0  0  0  0  0           0  0  0
    1.3207   -1.5172    0.0000 C   0  0  3  0  0  0           0  0  0
    2.7207   -0.7172    0.0000 C   0  0  0  0  0  0           0  0  0
   -0.5241    1.6690    0.0000 C   0  0  0  0  0  0           0  0  0
   -0.5241    0.0828    0.0000 C   0  0  0  0  0  0           0  0  0
    2.2586   -1.5172    0.0000 C   0  0  0  0  0  0           0  0  0
    0.9000   -2.3172    0.0000 C   0  0  0  0  0  0           0  0  0
    1.9759   -2.1690    0.0000 C   0  0  0  0  0  0           0  0  0
    3.6379   -0.7172    0.0000 O   0  0  0  0  0  0           0  0  0
   -1.4414    1.6828    0.0000 C   0  0  0  0  0  0           0  0  0
   -1.4414    0.0828    0.0000 C   0  0  0  0  0  0           0  0  0
   -1.9000    0.8690    0.0000 C   0  0  0  0  0  0           0  0  0
   -2.8241    0.8483    0.0000 S   0  0  3  0  0  0           0  0  0
   -2.8483    1.7690    0.0000 N   0  0  0  0  0  0           0  0  0
   -3.7414    0.8310    0.0000 O   0  0  0  0  0  0           0  0  0
   -2.8000   -0.0690    0.0000 O   0  0  0  0  0  0           0  0  0
  1  2  1  0     0  0
  1  3  1  0     0  0
  1  4  2  0     0  0
  2  5  1  0     0  0
  3  6  1  0     0  0
  4  7  1  0     0  0
  5  8  2  0     0  0
  5  9  1  0     0  0
  6 10  1  0     0  0
  6 11  1  0     0  0
  6 12  1  0     0  0
  7 13  2  0     0  0
  8 14  1  0     0  0
  9 15  2  0     0  0
 14 16  2  0     0  0
 16 17  1  0     0  0
 17 18  1  0     0  0
 17 19  2  0     0  0
 17 20  2  0     0  0
  7 10  1  0     0  0
 15 16  1  0     0  0
M  END
>  <IDNUMBER>
BAS 01521892

>  <BOX>
1

>  <CELL>
D9

>  <WEIGHT>
10.0

>  <MOL_WEIGHT>
294.37

>  <STRUCT_FORMULA>
C14H18N2O3S

>  <VENDOR_LOT>
248330

$$$$

          08231011372D 1   1.00000     0.00000     0

 21 24  0     0  0            999 V2000
   -0.7103    0.1379    0.0000 C   0  0  3  0  0  0           0  0  0
   -0.7103   -0.7828    0.0000 C   0  0  0  0  0  0           0  0  0
   -1.5103    0.6000    0.0000 C   0  0  0  0  0  0           0  0  0
    0.1517    0.4172    0.0000 C   0  0  3  0  0  0           0  0  0
   -0.7103    1.0552    0.0000 O   0  0  0  0  0  0           0  0  0
    0.1724   -1.0621    0.0000 N   0  3  0  0  0  0           0  0  0
   -1.5103   -1.2448    0.0000 C   0  0  0  0  0  0           0  0  0
   -2.3103    0.1379    0.0000 C   0  0  0  0  0  0           0  0  0
   -1.7103    1.5000    0.0000 N   0  0  0  0  0  0           0  0  0
    0.6897   -0.3241    0.0000 C   0  0  3  0  0  0           0  0  0
    0.4241    1.2862    0.0000 C   0  0  0  0  0  0           0  0  0
    0.4724   -1.9448    0.0000 O   0  5  0  0  0  0           0  0  0
   -2.3103   -0.7828    0.0000 C   0  0  0  0  0  0           0  0  0
   -2.9897    0.7621    0.0000 N   0  0  0  0  0  0           0  0  0
   -2.6103    1.6000    0.0000 O   0  0  0  0  0  0           0  0  0
    1.6103   -0.2828    0.0000 N   0  0  3  0  0  0           0  0  0
    2.1103   -1.0448    0.0000 C   0  0  0  0  0  0           0  0  0
    2.0276    0.5552    0.0000 C   0  0  0  0  0  0           0  0  0
    3.0276   -1.0000    0.0000 C   0  0  0  0  0  0           0  0  0
    2.9517    0.6000    0.0000 C   0  0  0  0  0  0           0  0  0
    3.4517   -0.1828    0.0000 O   0  0  0  0  0  0           0  0  0
  1  2  1  0     0  0
  1  3  1  0     0  0
  1  4  1  0     0  0
  1  5  1  0     0  0
  2  6  2  0     0  0
  2  7  1  0     0  0
  3  8  1  0     0  0
  3  9  2  0     0  0
  4 10  1  0     0  0
  4 11  1  0     0  0
  6 12  1  0     0  0
  7 13  1  0     0  0
  8 14  2  0     0  0
  9 15  1  0     0  0
 10 16  1  0     0  0
 16 17  1  0     0  0
 16 18  1  0     0  0
 17 19  1  0     0  0
 18 20  1  0     0  0
 19 21  1  0     0  0
  6 10  1  0     0  0
  8 13  1  0     0  0
 14 15  1  0     0  0
 20 21  1  0     0  0
M  CHG  2   6   1  12  -1
M  END
>  <IDNUMBER>
BAS 00318273

>  <BOX>
1

>  <CELL>
D10

>  <WEIGHT>
10.0

>  <MOL_WEIGHT>
294.31

>  <STRUCT_FORMULA>
C13H18N4O4

>  <VENDOR_LOT>
74593

$$$$

          08231011372D 1   1.00000     0.00000     0

 18 19  0     0  0            999 V2000
   -0.5862   -0.2000    0.0000 N   0  0  3  0  0  0           0  0  0
   -0.1034    0.4724    0.0000 C   0  0  0  0  0  0           0  0  0
   -0.3276   -0.9862    0.0000 C   0  0  0  0  0  0           0  0  0
   -1.4103   -0.2000    0.0000 C   0  0  0  0  0  0           0  0  0
    0.7138    0.3828    0.0000 C   0  0  0  0  0  0           0  0  0
   -0.4483    1.2207    0.0000 C   0  0  0  0  0  0           0  0  0
   -1.0000   -1.4621    0.0000 C   0  0  0  0  0  0           0  0  0
    0.4517   -1.2379    0.0000 C   0  0  0  0  0  0           0  0  0
   -1.6655   -0.9793    0.0000 C   0  0  0  0  0  0           0  0  0
   -1.9000    0.4724    0.0000 C   0  0  0  0  0  0           0  0  0
    1.2000    1.0448    0.0000 C   0  0  0  0  0  0           0  0  0
    0.0517    1.8655    0.0000 C   0  0  0  0  0  0           0  0  0
   -1.0000   -2.2862    0.0000 C   0  0  0  0  0  0           0  0  0
    0.8586    1.7931    0.0000 C   0  0  0  0  0  0           0  0  0
    2.0207    0.9586    0.0000 C   0  0  0  0  0  0           0  0  0
   -1.7103   -2.7000    0.0000 O   0  0  0  0  0  0           0  0  0
    2.3483    0.2207    0.0000 O   0  0  0  0  0  0           0  0  0
    2.5000    1.6241    0.0000 O   0  0  0  0  0  0           0  0  0
  1  2  1  0     0  0
  1  3  1  0     0  0
  1  4  1  0     0  0
  2  5  2  0     0  0
  2  6  1  0     0  0
  3  7  2  0     0  0
  3  8  1  0     0  0
  4  9  2  0     0  0
  4 10  1  0     0  0
  5 11  1  0     0  0
  6 12  2  0     0  0
  7 13  1  0     0  0
 11 14  2  0     0  0
 11 15  1  0     0  0
 13 16  2  0     0  0
 15 17  1  0     0  0
 15 18  2  0     0  0
  7  9  1  0     0  0
 12 14  1  0     0  0
M  END
>  <IDNUMBER>
BAS 02882126

>  <BOX>
1

>  <CELL>
D11

>  <WEIGHT>
10.0

>  <MOL_WEIGHT>
243.26

>  <STRUCT_FORMULA>
C14H13NO3

>  <VENDOR_LOT>
272966

$$$$

          08231011372D 1   1.00000     0.00000     0

 18 19  0     0  0            999 V2000
   -0.8483   -0.4207    0.0000 C   0  0  0  0  0  0           0  0  0
   -0.8483    0.2207    0.0000 C   0  0  0  0  0  0           0  0  0
   -1.4586   -0.6207    0.0000 N   0  0  3  0  0  0           0  0  0
   -0.2862   -0.7414    0.0000 C   0  0  0  0  0  0           0  0  0
   -0.2862    0.5414    0.0000 C   0  0  0  0  0  0           0  0  0
   -1.4586    0.4207    0.0000 N   0  0  3  0  0  0           0  0  0
   -1.8345   -0.0966    0.0000 C   0  0  0  0  0  0           0  0  0
   -1.6483   -1.2586    0.0000 C   0  0  0  0  0  0           0  0  0
    0.2655   -0.4207    0.0000 C   0  0  0  0  0  0           0  0  0
    0.2655    0.2207    0.0000 C   0  0  0  0  0  0           0  0  0
   -1.6690    1.0586    0.0000 C   0  0  0  0  0  0           0  0  0
   -2.4862   -0.0966    0.0000 O   0  0  0  0  0  0           0  0  0
    0.8655    0.5310    0.0000 C   0  0  0  0  0  0           0  0  0
    1.4138    0.1793    0.0000 N   0  0  0  0  0  0           0  0  0
    1.9931    0.4793    0.0000 N   0  0  0  0  0  0           0  0  0
    2.5310    0.1207    0.0000 C   0  0  0  0  0  0           0  0  0
    3.1138    0.4207    0.0000 N   0  0  0  0  0  0           0  0  0
    2.3793   -0.5448    0.0000 S   0  0  0  0  0  0           0  0  0
  1  2  2  0     0  0
  1  3  1  0     0  0
  1  4  1  0     0  0
  2  5  1  0     0  0
  2  6  1  0     0  0
  3  7  1  0     0  0
  3  8  1  0     0  0
  4  9  2  0     0  0
  5 10  2  0     0  0
  6 11  1  0     0  0
  7 12  2  0     0  0
 10 13  1  0     0  0
 13 14  2  0     0  0
 14 15  1  0     0  0
 15 16  1  0     0  0
 16 17  1  0     0  0
 16 18  2  0     0  0
  6  7  1  0     0  0
  9 10  1  0     0  0
M  END
>  <IDNUMBER>
BAS 00442510

>  <BOX>
1

>  <CELL>
D12

>  <WEIGHT>
10.0

>  <MOL_WEIGHT>
263.32

>  <STRUCT_FORMULA>
C11H13N5OS

>  <VENDOR_LOT>
172545

$$$$

          08231011372D 1   1.00000     0.00000     0

 20 22  0     0  0            999 V2000
    1.0241    0.2000    0.0000 C   0  0  0  0  0  0           0  0  0
    0.9483   -0.5586    0.0000 N   0  0  3  0  0  0           0  0  0
    1.8207    0.3621    0.0000 C   0  0  0  0  0  0           0  0  0
    0.3759    0.6621    0.0000 N   0  0  0  0  0  0           0  0  0
    0.2241   -0.9000    0.0000 C   0  0  0  0  0  0           0  0  0
    1.6586   -0.9069    0.0000 N   0  0  0  0  0  0           0  0  0
    2.2000   -0.3000    0.0000 C   0  0  0  0  0  0           0  0  0
    2.1586    1.0759    0.0000 C   0  0  0  0  0  0           0  0  0
   -0.3414    0.3517    0.0000 C   0  0  0  0  0  0           0  0  0
   -0.4241   -0.4069    0.0000 C   0  0  0  0  0  0           0  0  0
    1.7241    1.7310    0.0000 N   0  0  0  0  0  0           0  0  0
    2.9379    1.1379    0.0000 O   0  0  0  0  0  0           0  0  0
   -1.1414   -0.7483    0.0000 C   0  0  0  0  0  0           0  0  0
   -1.7931   -0.2759    0.0000 C   0  0  0  0  0  0           0  0  0
   -1.3793   -1.5000    0.0000 N   0  0  0  0  0  0           0  0  0
   -2.4241   -0.7379    0.0000 C   0  0  0  0  0  0           0  0  0
   -1.7931    0.5138    0.0000 N   0  3  0  0  0  0           0  0  0
   -2.1621   -1.5000    0.0000 N   0  0  0  0  0  0           0  0  0
   -2.4931    0.8793    0.0000 O   0  0  0  0  0  0           0  0  0
   -1.1138    0.9138    0.0000 O   0  5  0  0  0  0           0  0  0
  1  2  1  0     0  0
  1  3  2  0     0  0
  1  4  1  0     0  0
  2  5  1  0     0  0
  2  6  1  0     0  0
  3  7  1  0     0  0
  3  8  1  0     0  0
  4  9  2  0     0  0
  5 10  2  0     0  0
  8 11  1  0     0  0
  8 12  2  0     0  0
 10 13  1  0     0  0
 13 14  1  0     0  0
 13 15  2  0     0  0
 14 16  2  0     0  0
 14 17  1  0     0  0
 15 18  1  0     0  0
 17 19  2  0     0  0
 17 20  1  0     0  0
  6  7  2  0     0  0
  9 10  1  0     0  0
 16 18  1  0     0  0
M  CHG  2  17   1  20  -1
M  END
>  <IDNUMBER>
BAS 00666414

>  <BOX>
1

>  <CELL>
E1

>  <WEIGHT>
10.0

>  <MOL_WEIGHT>
273.21

>  <STRUCT_FORMULA>
C10H7N7O3

>  <VENDOR_LOT>
288644

$$$$

          08231011372D 1   1.00000     0.00000     0

 18 19  0     0  0            999 V2000
   -0.1552    0.1828    0.0000 C   0  0  0  0  0  0           0  0  0
    0.4138    0.3690    0.0000 C   0  0  3  0  0  0           0  0  0
   -0.2724   -0.4069    0.0000 C   0  0  0  0  0  0           0  0  0
   -0.6207    0.5828    0.0000 C   0  0  0  0  0  0           0  0  0
    0.9069    0.0207    0.0000 N   0  0  0  0  0  0           0  0  0
    0.6069    0.9586    0.0000 S   0  0  0  0  0  0           0  0  0
   -0.8345   -0.6069    0.0000 C   0  0  0  0  0  0           0  0  0
   -1.1931    0.3690    0.0000 C   0  0  0  0  0  0           0  0  0
    1.4069    0.3828    0.0000 C   0  0  3  0  0  0           0  0  0
    1.2069    0.9586    0.0000 C   0  0  0  0  0  0           0  0  0
   -1.3069   -0.2172    0.0000 C   0  0  0  0  0  0           0  0  0
   -0.9448   -1.1931    0.0000 O   0  0  0  0  0  0           0  0  0
    1.9897    0.2069    0.0000 C   0  0  0  0  0  0           0  0  0
   -1.8690   -0.4276    0.0000 O   0  0  0  0  0  0           0  0  0
   -1.5069   -1.3931    0.0000 C   0  0  0  0  0  0           0  0  0
    2.0690   -0.3690    0.0000 O   0  0  0  0  0  0           0  0  0
    2.4448    0.6241    0.0000 O   0  0  0  0  0  0           0  0  0
   -2.3310   -0.0414    0.0000 C   0  0  0  0  0  0           0  0  0
  1  2  1  0     0  0
  1  3  1  0     0  0
  1  4  2  0     0  0
  2  5  1  0     0  0
  2  6  1  0     0  0
  3  7  2  0     0  0
  4  8  1  0     0  0
  5  9  1  0     0  0
  6 10  1  0     0  0
  7 11  1  0     0  0
  7 12  1  0     0  0
  9 13  1  0     0  0
 11 14  1  0     0  0
 12 15  1  0     0  0
 13 16  1  0     0  0
 13 17  2  0     0  0
 14 18  1  0     0  0
  8 11  2  0     0  0
  9 10  1  0     0  0
M  END
>  <IDNUMBER>
BAS 00654188

>  <BOX>
1

>  <CELL>
E2

>  <WEIGHT>
10.0

>  <MOL_WEIGHT>
269.32

>  <STRUCT_FORMULA>
C12H15NO4S

>  <VENDOR_LOT>
315273

$$$$

          08231011372D 1   1.00000     0.00000     0

 18 19  0     0  0            999 V2000
   -0.9862   -0.9379    0.0000 C   0  0  0  0  0  0           0  0  0
   -0.1724   -1.2759    0.0000 C   0  0  0  0  0  0           0  0  0
   -1.7034   -1.4759    0.0000 S   0  0  0  0  0  0           0  0  0
   -1.2655   -0.1138    0.0000 C   0  0  0  0  0  0           0  0  0
    0.5483   -0.7276    0.0000 C   0  0  0  0  0  0           0  0  0
   -2.4138   -0.9483    0.0000 C   0  0  0  0  0  0           0  0  0
   -2.1724   -0.1138    0.0000 N   0  0  0  0  0  0           0  0  0
   -0.8483    0.6517    0.0000 O   0  0  0  0  0  0           0  0  0
    0.4276    0.1414    0.0000 C   0  0  0  0  0  0           0  0  0
    1.3483   -1.0379    0.0000 C   0  0  0  0  0  0           0  0  0
   -3.2345   -1.3103    0.0000 N   0  0  0  0  0  0           0  0  0
    1.1034    0.6897    0.0000 C   0  0  0  0  0  0           0  0  0
    2.0483   -0.5103    0.0000 C   0  0  0  0  0  0           0  0  0
    1.9138    0.3621    0.0000 C   0  0  0  0  0  0           0  0  0
    0.9862    1.5621    0.0000 N   0  3  0  0  0  0           0  0  0
    2.5966    0.9241    0.0000 O   0  0  0  0  0  0           0  0  0
    0.1966    1.9414    0.0000 O   0  0  0  0  0  0           0  0  0
    1.6276    2.1724    0.0000 O   0  5  0  0  0  0           0  0  0
  1  2  2  0     0  0
  1  3  1  0     0  0
  1  4  1  0     0  0
  2  5  1  0     0  0
  3  6  1  0     0  0
  4  7  1  0     0  0
  4  8  2  0     0  0
  5  9  2  0     0  0
  5 10  1  0     0  0
  6 11  2  0     0  0
  9 12  1  0     0  0
 10 13  2  0     0  0
 12 14  2  0     0  0
 12 15  1  0     0  0
 14 16  1  0     0  0
 15 17  2  0     0  0
 15 18  1  0     0  0
  6  7  1  0     0  0
 13 14  1  0     0  0
M  CHG  2  15   1  18  -1
M  END
>  <IDNUMBER>
BAS 03302167

>  <BOX>
1

>  <CELL>
E3

>  <WEIGHT>
10.0

>  <MOL_WEIGHT>
265.25

>  <STRUCT_FORMULA>
C10H7N3O4S

>  <VENDOR_LOT>
53934

$$$$

          08231011372D 1   1.00000     0.00000     0

 18 19  0     0  0            999 V2000
   -0.3931   -1.4138    0.0000 C   0  0  0  0  0  0           0  0  0
    0.5586   -1.0379    0.0000 C   0  0  0  0  0  0           0  0  0
   -1.2310   -0.8207    0.0000 C   0  0  0  0  0  0           0  0  0
   -0.7276   -2.4345    0.0000 S   0  0  0  0  0  0           0  0  0
    0.7345   -0.0345    0.0000 C   0  0  0  0  0  0           0  0  0
   -2.1276   -1.4138    0.0000 N   0  0  3  0  0  0           0  0  0
   -1.2310    0.2172    0.0000 O   0  0  0  0  0  0           0  0  0
   -1.7759   -2.4345    0.0000 C   0  0  0  0  0  0           0  0  0
    1.7207    0.3483    0.0000 C   0  0  0  0  0  0           0  0  0
   -0.0793    0.6172    0.0000 C   0  0  0  0  0  0           0  0  0
   -3.0759   -1.0379    0.0000 N   0  0  0  0  0  0           0  0  0
   -2.3793   -3.3138    0.0000 S   0  0  0  0  0  0           0  0  0
    1.8690    1.3862    0.0000 C   0  0  0  0  0  0           0  0  0
    0.1000    1.6621    0.0000 C   0  0  0  0  0  0           0  0  0
    1.0483    2.0276    0.0000 C   0  0  0  0  0  0           0  0  0
    2.8345    1.7862    0.0000 O   0  0  0  0  0  0           0  0  0
    1.1862    3.0621    0.0000 O   0  0  0  0  0  0           0  0  0
    2.9690    2.8276    0.0000 C   0  0  0  0  0  0           0  0  0
  1  2  2  0     0  0
  1  3  1  0     0  0
  1  4  1  0     0  0
  2  5  1  0     0  0
  3  6  1  0     0  0
  3  7  2  0     0  0
  4  8  1  0     0  0
  5  9  1  0     0  0
  5 10  2  0     0  0
  6 11  1  0     0  0
  8 12  2  0     0  0
  9 13  2  0     0  0
 10 14  1  0     0  0
 13 15  1  0     0  0
 13 16  1  0     0  0
 15 17  1  0     0  0
 16 18  1  0     0  0
  6  8  1  0     0  0
 14 15  2  0     0  0
M  END
>  <IDNUMBER>
BAS 00566627

>  <BOX>
1

>  <CELL>
E4

>  <WEIGHT>
10.0

>  <MOL_WEIGHT>
282.34

>  <STRUCT_FORMULA>
C11H10N2O3S2

>  <VENDOR_LOT>
112790

$$$$

          08231011372D 1   1.00000     0.00000     0

 21 22  0     0  0            999 V2000
   -0.7897   -0.0034    0.0000 C   0  0  0  0  0  0           0  0  0
   -0.0138   -0.2793    0.0000 C   0  0  0  0  0  0           0  0  0
   -0.9414    0.8069    0.0000 C   0  0  0  0  0  0           0  0  0
   -1.4241   -0.5414    0.0000 C   0  0  0  0  0  0           0  0  0
    0.6138    0.2586    0.0000 C   0  0  0  0  0  0           0  0  0
    0.1345   -1.0931    0.0000 C   0  0  0  0  0  0           0  0  0
   -1.7241    1.0828    0.0000 C   0  0  0  0  0  0           0  0  0
   -2.1966   -0.2655    0.0000 C   0  0  0  0  0  0           0  0  0
    1.3897   -0.0241    0.0000 C   0  0  0  0  0  0           0  0  0
    0.2897   -1.9034    0.0000 N   0  0  0  0  0  0           0  0  0
   -2.3483    0.5448    0.0000 C   0  0  0  0  0  0           0  0  0
    2.0138    0.5138    0.0000 C   0  0  0  0  0  0           0  0  0
    1.5379   -0.8379    0.0000 C   0  0  0  0  0  0           0  0  0
   -3.1276    0.8207    0.0000 N   0  3  0  0  0  0           0  0  0
    2.7897    0.2379    0.0000 C   0  0  0  0  0  0           0  0  0
    1.8586    1.3207    0.0000 O   0  0  0  0  0  0           0  0  0
    2.3138   -1.1138    0.0000 C   0  0  0  0  0  0           0  0  0
   -3.7621    0.2759    0.0000 O   0  0  0  0  0  0           0  0  0
   -3.2862    1.6241    0.0000 O   0  5  0  0  0  0           0  0  0
    2.9379   -0.5759    0.0000 C   0  0  0  0  0  0           0  0  0
    3.7241   -0.8483    0.0000 O   0  0  0  0  0  0           0  0  0
  1  2  1  0     0  0
  1  3  2  0     0  0
  1  4  1  0     0  0
  2  5  2  0     0  0
  2  6  1  0     0  0
  3  7  1  0     0  0
  4  8  2  0     0  0
  5  9  1  0     0  0
  6 10  3  0     0  0
  7 11  2  0     0  0
  9 12  1  0     0  0
  9 13  2  0     0  0
 11 14  1  0     0  0
 12 15  2  0     0  0
 12 16  1  0     0  0
 13 17  1  0     0  0
 14 18  2  0     0  0
 14 19  1  0     0  0
 15 20  1  0     0  0
 20 21  1  0     0  0
  8 11  1  0     0  0
 17 20  2  0     0  0
M  CHG  2  14   1  19  -1
M  END
>  <IDNUMBER>
BAS 00804017

>  <BOX>
1

>  <CELL>
E5

>  <WEIGHT>
10.0

>  <MOL_WEIGHT>
282.25

>  <STRUCT_FORMULA>
C15H10N2O4

>  <VENDOR_LOT>
114540

$$$$

          08231011372D 1   1.00000     0.00000     0

 20 21  0     0  0            999 V2000
    0.2690    0.4241    0.0000 C   0  0  0  0  0  0           0  0  0
    0.8931    0.0621    0.0000 C   0  0  0  0  0  0           0  0  0
   -0.3483    0.0621    0.0000 C   0  0  0  0  0  0           0  0  0
    0.2690    1.1241    0.0000 N   0  3  0  0  0  0           0  0  0
    0.8931   -0.6586    0.0000 C   0  0  0  0  0  0           0  0  0
    1.5517    0.2862    0.0000 N   0  0  0  0  0  0           0  0  0
   -0.3483   -0.6586    0.0000 C   0  0  0  0  0  0           0  0  0
   -0.9690    0.4241    0.0000 N   0  0  0  0  0  0           0  0  0
   -0.3310    1.4862    0.0000 O   0  0  0  0  0  0           0  0  0
    0.8931    1.4862    0.0000 O   0  5  0  0  0  0           0  0  0
    0.2690   -0.9966    0.0000 C   0  0  0  0  0  0           0  0  0
    1.5517   -0.8586    0.0000 N   0  0  0  0  0  0           0  0  0
    1.9690   -0.2966    0.0000 C   0  0  0  0  0  0           0  0  0
   -0.9690   -1.0138    0.0000 N   0  3  0  0  0  0           0  0  0
   -1.6966    0.5862    0.0000 C   0  0  0  0  0  0           0  0  0
    2.6690   -0.3379    0.0000 O   0  0  0  0  0  0           0  0  0
   -0.9690   -1.7138    0.0000 O   0  0  0  0  0  0           0  0  0
   -1.5690   -0.6586    0.0000 O   0  5  0  0  0  0           0  0  0
   -1.8483    1.1759    0.0000 C   0  0  0  0  0  0           0  0  0
   -2.1966    0.0552    0.0000 O   0  0  0  0  0  0           0  0  0
  1  2  1  0     0  0
  1  3  2  0     0  0
  1  4  1  0     0  0
  2  5  2  0     0  0
  2  6  1  0     0  0
  3  7  1  0     0  0
  3  8  1  0     0  0
  4  9  2  0     0  0
  4 10  1  0     0  0
  5 11  1  0     0  0
  5 12  1  0     0  0
  6 13  1  0     0  0
  7 14  1  0     0  0
  8 15  1  0     0  0
 13 16  2  0     0  0
 14 17  2  0     0  0
 14 18  1  0     0  0
 15 19  1  0     0  0
 15 20  2  0     0  0
  7 11  2  0     0  0
 12 13  1  0     0  0
M  CHG  4   4   1  10  -1  14   1  18  -1
M  END
>  <IDNUMBER>
BAS 01047518

>  <BOX>
1

>  <CELL>
E6

>  <WEIGHT>
10.0

>  <MOL_WEIGHT>
281.18

>  <STRUCT_FORMULA>
C9H7N5O6

>  <VENDOR_LOT>
223243

$$$$

          08231011372D 1   1.00000     0.00000     0

 18 19  0     0  0            999 V2000
   -0.9586    0.6310    0.0000 C   0  0  0  0  0  0           0  0  0
   -2.3793    0.6310    0.0000 C   0  0  3  0  0  0           0  0  0
   -0.9586   -0.1966    0.0000 N   0  0  0  0  0  0           0  0  0
   -0.2483    1.0448    0.0000 C   0  0  0  0  0  0           0  0  0
   -2.3793   -0.1966    0.0000 C   0  0  0  0  0  0           0  0  0
   -2.9690    1.2172    0.0000 C   0  0  0  0  0  0           0  0  0
   -1.6724   -0.6034    0.0000 N   0  0  0  0  0  0           0  0  0
    0.4690    0.6345    0.0000 N   0  0  0  0  0  0           0  0  0
   -0.2483    1.8655    0.0000 O   0  0  0  0  0  0           0  0  0
   -3.0966   -0.6034    0.0000 O   0  0  0  0  0  0           0  0  0
    1.1828    1.0448    0.0000 N   0  0  0  0  0  0           0  0  0
    1.8966    0.6310    0.0000 C   0  0  0  0  0  0           0  0  0
    1.8966   -0.1931    0.0000 C   0  0  0  0  0  0           0  0  0
    1.1828   -0.6034    0.0000 C   0  0  0  0  0  0           0  0  0
    2.6069   -0.6034    0.0000 C   0  0  0  0  0  0           0  0  0
    1.1793   -1.4276    0.0000 C   0  0  0  0  0  0           0  0  0
    2.6069   -1.4276    0.0000 N   0  0  0  0  0  0           0  0  0
    1.8897   -1.8414    0.0000 C   0  0  0  0  0  0           0  0  0
  1  2  1  0     0  0
  1  3  2  0     0  0
  1  4  1  0     0  0
  2  5  1  0     0  0
  2  6  1  0     0  0
  3  7  1  0     0  0
  4  8  1  0     0  0
  4  9  2  0     0  0
  5 10  2  0     0  0
  8 11  1  0     0  0
 11 12  2  0     0  0
 12 13  1  0     0  0
 13 14  2  0     0  0
 13 15  1  0     0  0
 14 16  1  0     0  0
 15 17  2  0     0  0
 16 18  2  0     0  0
  5  7  1  0     0  0
 17 18  1  0     0  0
M  END
>  <IDNUMBER>
BAS 00715781

>  <BOX>
1

>  <CELL>
E7

>  <WEIGHT>
10.0

>  <MOL_WEIGHT>
245.24

>  <STRUCT_FORMULA>
C11H11N5O2

>  <VENDOR_LOT>
10116

$$$$

          08231011372D 1   1.00000     0.00000     0

 21 22  0     0  0            999 V2000
   -0.0310    0.0034    0.0000 C   0  0  3  0  0  0           0  0  0
   -0.8103   -0.4345    0.0000 C   0  0  3  0  0  0           0  0  0
   -0.0241    0.9034    0.0000 C   0  0  3  0  0  0           0  0  0
    0.8172   -0.2690    0.0000 C   0  0  0  0  0  0           0  0  0
   -1.5828    0.0138    0.0000 C   0  0  3  0  0  0           0  0  0
   -0.8103   -1.3345    0.0000 C   0  0  0  0  0  0           0  0  0
   -0.8103    1.3655    0.0000 C   0  0  0  0  0  0           0  0  0
    0.7759    1.3379    0.0000 C   0  0  0  0  0  0           0  0  0
    1.5897    0.1828    0.0000 C   0  0  0  0  0  0           0  0  0
    0.8276   -1.1621    0.0000 C   0  0  0  0  0  0           0  0  0
   -1.5828    0.9138    0.0000 C   0  0  0  0  0  0           0  0  0
   -2.1586   -0.6690    0.0000 C   0  0  0  0  0  0           0  0  0
   -2.4069    0.3517    0.0000 O   0  0  0  0  0  0           0  0  0
   -1.5931   -1.7828    0.0000 C   0  0  0  0  0  0           0  0  0
   -0.0448   -1.7862    0.0000 O   0  0  0  0  0  0           0  0  0
   -0.8241    2.2655    0.0000 O   0  0  0  0  0  0           0  0  0
    1.5414    0.8897    0.0000 C   0  0  0  0  0  0           0  0  0
    0.7931    2.2517    0.0000 O   0  0  0  0  0  0           0  0  0
    2.3690   -0.2621    0.0000 C   0  0  0  0  0  0           0  0  0
    1.5931   -1.6103    0.0000 C   0  0  0  0  0  0           0  0  0
    2.3759   -1.1690    0.0000 C   0  0  0  0  0  0           0  0  0
  1  2  1  0     0  0
  1  3  1  0     0  0
  1  4  1  0     0  0
  2  5  1  0     0  0
  2  6  1  0     0  0
  3  7  1  0     0  0
  3  8  1  0     0  0
  4  9  2  0     0  0
  4 10  1  0     0  0
  5 11  1  0     0  0
  5 12  1  0     0  0
  5 13  1  0     0  0
  6 14  1  0     0  0
  6 15  2  0     0  0
  7 16  2  0     0  0
  8 17  1  0     0  0
  8 18  2  0     0  0
  9 19  1  0     0  0
 10 20  2  0     0  0
 19 21  2  0     0  0
  7 11  1  0     0  0
 20 21  1  0     0  0
M  END
>  <IDNUMBER>
BAS 00436328

>  <BOX>
1

>  <CELL>
E8

>  <WEIGHT>
10.0

>  <MOL_WEIGHT>
288.34

>  <STRUCT_FORMULA>
C17H20O4

>  <VENDOR_LOT>
169522

$$$$

          08231011372D 1   1.00000     0.00000     0

 20 21  0     0  0            999 V2000
   -0.1000    0.2931    0.0000 N   0  0  3  0  0  0           0  0  0
   -0.8414    0.2931    0.0000 C   0  0  0  0  0  0           0  0  0
    0.3000   -0.3310    0.0000 C   0  0  0  0  0  0           0  0  0
    0.3586    0.8690    0.0000 C   0  0  0  0  0  0           0  0  0
   -1.2000    0.9310    0.0000 C   0  0  0  0  0  0           0  0  0
   -1.2000   -0.3517    0.0000 C   0  0  0  0  0  0           0  0  0
    1.0000   -0.1069    0.0000 C   0  0  3  0  0  0           0  0  0
    0.0586   -1.0310    0.0000 O   0  0  0  0  0  0           0  0  0
    1.0379    0.5931    0.0000 C   0  0  0  0  0  0           0  0  0
    0.1759    1.5931    0.0000 O   0  0  0  0  0  0           0  0  0
   -1.9414    0.9310    0.0000 C   0  0  0  0  0  0           0  0  0
   -1.9414   -0.3517    0.0000 C   0  0  0  0  0  0           0  0  0
    1.6000   -0.5897    0.0000 S   0  0  0  0  0  0           0  0  0
   -2.3000    0.2931    0.0000 C   0  0  0  0  0  0           0  0  0
    2.2759   -0.3069    0.0000 C   0  0  0  0  0  0           0  0  0
   -3.0414    0.2931    0.0000 O   0  0  0  0  0  0           0  0  0
    2.8586   -0.7517    0.0000 C   0  0  0  0  0  0           0  0  0
   -3.4241   -0.3517    0.0000 C   0  0  0  0  0  0           0  0  0
    2.7586   -1.4690    0.0000 O   0  0  0  0  0  0           0  0  0
    3.5379   -0.4690    0.0000 O   0  0  0  0  0  0           0  0  0
  1  2  1  0     0  0
  1  3  1  0     0  0
  1  4  1  0     0  0
  2  5  2  0     0  0
  2  6  1  0     0  0
  3  7  1  0     0  0
  3  8  2  0     0  0
  4  9  1  0     0  0
  4 10  2  0     0  0
  5 11  1  0     0  0
  6 12  2  0     0  0
  7 13  1  0     0  0
 11 14  2  0     0  0
 13 15  1  0     0  0
 14 16  1  0     0  0
 15 17  1  0     0  0
 16 18  1  0     0  0
 17 19  1  0     0  0
 17 20  2  0     0  0
  7  9  1  0     0  0
 12 14  1  0     0  0
M  END
>  <IDNUMBER>
BAS 00126095

>  <BOX>
1

>  <CELL>
E9

>  <WEIGHT>
10.0

>  <MOL_WEIGHT>
295.31

>  <STRUCT_FORMULA>
C13H13NO5S

>  <VENDOR_LOT>
4783

$$$$

          08231011372D 1   1.00000     0.00000     0

 20 21  0     0  0            999 V2000
   -0.7207   -0.4172    0.0000 C   0  0  0  0  0  0           0  0  0
    0.0793   -0.8966    0.0000 C   0  0  0  0  0  0           0  0  0
   -1.5448   -0.8793    0.0000 C   0  0  0  0  0  0           0  0  0
   -0.7207    0.5034    0.0000 C   0  0  0  0  0  0           0  0  0
    0.9000   -0.4345    0.0000 C   0  0  0  0  0  0           0  0  0
   -2.3207   -0.4172    0.0000 C   0  0  0  0  0  0           0  0  0
   -1.5828   -1.7966    0.0000 O   0  0  0  0  0  0           0  0  0
   -1.5207    0.9655    0.0000 C   0  0  0  0  0  0           0  0  0
    0.9000    0.5034    0.0000 C   0  0  0  0  0  0           0  0  0
    1.7000   -0.8966    0.0000 C   0  0  0  0  0  0           0  0  0
   -2.3207    0.5207    0.0000 C   0  0  0  0  0  0           0  0  0
   -2.3828   -2.2172    0.0000 C   0  0  0  0  0  0           0  0  0
   -1.5207    1.8897    0.0000 O   0  0  0  0  0  0           0  0  0
    1.7000    0.9655    0.0000 N   0  0  0  0  0  0           0  0  0
    0.1000    0.9828    0.0000 O   0  0  0  0  0  0           0  0  0
    2.5000   -0.4172    0.0000 N   0  0  0  0  0  0           0  0  0
    1.7000   -1.8345    0.0000 O   0  0  0  0  0  0           0  0  0
   -0.7448    2.3310    0.0000 C   0  0  0  0  0  0           0  0  0
    2.5000    0.5207    0.0000 C   0  0  0  0  0  0           0  0  0
    3.3000    1.0207    0.0000 O   0  0  0  0  0  0           0  0  0
  1  2  1  0     0  0
  1  3  1  0     0  0
  1  4  2  0     0  0
  2  5  2  0     0  0
  3  6  2  0     0  0
  3  7  1  0     0  0
  4  8  1  0     0  0
  5  9  1  0     0  0
  5 10  1  0     0  0
  6 11  1  0     0  0
  7 12  1  0     0  0
  8 13  1  0     0  0
  9 14  1  0     0  0
  9 15  2  0     0  0
 10 16  1  0     0  0
 10 17  2  0     0  0
 13 18  1  0     0  0
 14 19  1  0     0  0
 19 20  2  0     0  0
  8 11  2  0     0  0
 16 19  1  0     0  0
M  END
>  <IDNUMBER>
BAS 00154355

>  <BOX>
1

>  <CELL>
E10

>  <WEIGHT>
10.0

>  <MOL_WEIGHT>
276.25

>  <STRUCT_FORMULA>
C13H12N2O5

>  <VENDOR_LOT>
172511

$$$$

          08231011372D 1   1.00000     0.00000     0

 21 22  0     0  0            999 V2000
   -2.2276   -0.4655    0.0000 C   0  0  0  0  0  0           0  0  0
   -1.5759   -0.0897    0.0000 C   0  0  0  0  0  0           0  0  0
   -2.8759   -0.0897    0.0000 C   0  0  0  0  0  0           0  0  0
   -2.2276   -1.2138    0.0000 C   0  0  0  0  0  0           0  0  0
   -0.9276   -0.4655    0.0000 N   0  0  0  0  0  0           0  0  0
   -3.5276   -0.4655    0.0000 C   0  0  0  0  0  0           0  0  0
   -2.8759   -1.5897    0.0000 C   0  0  0  0  0  0           0  0  0
   -0.2759   -0.0897    0.0000 C   0  0  0  0  0  0           0  0  0
   -3.5276   -1.2138    0.0000 N   0  0  0  0  0  0           0  0  0
   -0.2759    0.6621    0.0000 C   0  0  0  0  0  0           0  0  0
    0.3690   -0.4655    0.0000 O   0  0  0  0  0  0           0  0  0
    0.3690    1.0345    0.0000 N   0  0  0  0  0  0           0  0  0
   -0.9276    1.0345    0.0000 O   0  0  0  0  0  0           0  0  0
    1.0207    0.6621    0.0000 N   0  0  0  0  0  0           0  0  0
    1.6690    1.0345    0.0000 C   0  0  0  0  0  0           0  0  0
    2.3207    0.6621    0.0000 C   0  0  0  0  0  0           0  0  0
    2.3207   -0.0897    0.0000 C   0  0  0  0  0  0           0  0  0
    2.9690    1.0345    0.0000 C   0  0  0  0  0  0           0  0  0
    2.9690   -0.4655    0.0000 C   0  0  0  0  0  0           0  0  0
    3.6207    0.6621    0.0000 C   0  0  0  0  0  0           0  0  0
    3.6207   -0.0897    0.0000 N   0  0  0  0  0  0           0  0  0
  1  2  1  0     0  0
  1  3  1  0     0  0
  1  4  2  0     0  0
  2  5  1  0     0  0
  3  6  2  0     0  0
  4  7  1  0     0  0
  5  8  1  0     0  0
  6  9  1  0     0  0
  8 10  1  0     0  0
  8 11  2  0     0  0
 10 12  1  0     0  0
 10 13  2  0     0  0
 12 14  1  0     0  0
 14 15  2  0     0  0
 15 16  1  0     0  0
 16 17  1  0     0  0
 16 18  2  0     0  0
 17 19  2  0     0  0
 18 20  1  0     0  0
 19 21  1  0     0  0
  7  9  2  0     0  0
 20 21  2  0     0  0
M  END
>  <IDNUMBER>
BAS 00881305

>  <BOX>
1

>  <CELL>
E11

>  <WEIGHT>
10.0

>  <MOL_WEIGHT>
283.29

>  <STRUCT_FORMULA>
C14H13N5O2

>  <VENDOR_LOT>
52208

$$$$

          08231011372D 1   1.00000     0.00000     0

 21 24  0     0  0            999 V2000
   -0.5069    0.1724    0.0000 C   0  0  3  0  0  0           0  0  0
   -1.3069    0.6345    0.0000 C   0  0  0  0  0  0           0  0  0
   -0.5069   -0.7483    0.0000 C   0  0  0  0  0  0           0  0  0
    0.3552    0.4517    0.0000 C   0  0  0  0  0  0           0  0  0
   -0.5069    1.0897    0.0000 O   0  0  0  0  0  0           0  0  0
   -2.1069    0.1724    0.0000 C   0  0  0  0  0  0           0  0  0
   -1.5069    1.5345    0.0000 N   0  0  0  0  0  0           0  0  0
    0.3759   -1.0276    0.0000 N   0  3  0  0  0  0           0  0  0
   -1.3069   -1.2103    0.0000 C   0  0  0  0  0  0           0  0  0
    0.8931   -0.2897    0.0000 C   0  0  3  0  0  0           0  0  0
   -2.1069   -0.7483    0.0000 C   0  0  0  0  0  0           0  0  0
   -2.7862    0.7966    0.0000 N   0  3  0  0  0  0           0  0  0
   -2.4069    1.6345    0.0000 O   0  0  0  0  0  0           0  0  0
    0.6759   -1.9103    0.0000 O   0  5  0  0  0  0           0  0  0
    1.8138   -0.2483    0.0000 N   0  0  3  0  0  0           0  0  0
   -3.6724    0.6103    0.0000 O   0  5  0  0  0  0           0  0  0
    2.2310    0.5897    0.0000 C   0  0  0  0  0  0           0  0  0
    2.3138   -1.0103    0.0000 C   0  0  0  0  0  0           0  0  0
    3.1552    0.6345    0.0000 C   0  0  0  0  0  0           0  0  0
    3.2310   -0.9655    0.0000 C   0  0  0  0  0  0           0  0  0
    3.6552   -0.1483    0.0000 O   0  0  0  0  0  0           0  0  0
  1  2  1  0     0  0
  1  3  1  0     0  0
  1  4  1  0     0  0
  1  5  1  0     0  0
  2  6  1  0     0  0
  2  7  2  0     0  0
  3  8  2  0     0  0
  3  9  1  0     0  0
  4 10  1  0     0  0
  6 11  1  0     0  0
  6 12  2  0     0  0
  7 13  1  0     0  0
  8 14  1  0     0  0
 10 15  1  0     0  0
 12 16  1  0     0  0
 15 17  1  0     0  0
 15 18  1  0     0  0
 17 19  1  0     0  0
 18 20  1  0     0  0
 19 21  1  0     0  0
  8 10  1  0     0  0
  9 11  1  0     0  0
 12 13  1  0     0  0
 20 21  1  0     0  0
M  CHG  4   8   1  12   1  14  -1  16  -1
M  END
>  <IDNUMBER>
BAS 00318274

>  <BOX>
1

>  <CELL>
E12

>  <WEIGHT>
10.0

>  <MOL_WEIGHT>
296.28

>  <STRUCT_FORMULA>
C12H16N4O5

>  <VENDOR_LOT>
99362

$$$$

          08231011372D 1   1.00000     0.00000     0

 22 25  0     0  0            999 V2000
    0.7310    0.0310    0.0000 C   0  0  0  0  0  0           0  0  0
   -0.0931    0.0276    0.0000 C   0  0  0  0  0  0           0  0  0
    0.9793   -0.7552    0.0000 C   0  0  0  0  0  0           0  0  0
    1.4276    0.5000    0.0000 C   0  0  0  0  0  0           0  0  0
   -0.3448   -0.7690    0.0000 C   0  0  0  0  0  0           0  0  0
   -0.6690    0.6310    0.0000 C   0  0  0  0  0  0           0  0  0
    1.8138   -0.7690    0.0000 C   0  0  0  0  0  0           0  0  0
    0.3448   -1.2345    0.0000 N   0  0  0  0  0  0           0  0  0
    2.0793   -0.0207    0.0000 C   0  0  0  0  0  0           0  0  0
   -1.1552   -0.9552    0.0000 C   0  0  0  0  0  0           0  0  0
   -1.4690    0.4448    0.0000 C   0  0  0  0  0  0           0  0  0
    2.3276   -1.4552    0.0000 N   0  0  0  0  0  0           0  0  0
   -1.7241   -0.3345    0.0000 C   0  0  0  0  0  0           0  0  0
   -2.0241    1.0517    0.0000 C   0  0  3  0  0  0           0  0  0
    3.1552   -1.3690    0.0000 C   0  0  0  0  0  0           0  0  0
   -1.7690    1.8448    0.0000 C   0  0  0  0  0  0           0  0  0
   -2.8448    0.8759    0.0000 C   0  0  0  0  0  0           0  0  0
    3.6448   -2.0483    0.0000 C   0  0  0  0  0  0           0  0  0
   -2.3207    2.4759    0.0000 C   0  0  0  0  0  0           0  0  0
   -3.4069    1.5000    0.0000 C   0  0  0  0  0  0           0  0  0
    4.4655   -1.9690    0.0000 O   0  0  0  0  0  0           0  0  0
   -3.1448    2.3000    0.0000 C   0  0  0  0  0  0           0  0  0
  1  2  1  0     0  0
  1  3  2  0     0  0
  1  4  1  0     0  0
  2  5  2  0     0  0
  2  6  1  0     0  0
  3  7  1  0     0  0
  3  8  1  0     0  0
  4  9  1  0     0  0
  5 10  1  0     0  0
  6 11  2  0     0  0
  7 12  2  0     0  0
 10 13  2  0     0  0
 11 14  1  0     0  0
 12 15  1  0     0  0
 14 16  1  0     0  0
 14 17  1  0     0  0
 15 18  1  0     0  0
 16 19  1  0     0  0
 17 20  1  0     0  0
 18 21  1  0     0  0
 19 22  1  0     0  0
  5  8  1  0     0  0
  7  9  1  0     0  0
 11 13  1  0     0  0
 20 22  1  0     0  0
M  END
>  <IDNUMBER>
BAS 01026752

>  <BOX>
1

>  <CELL>
F1

>  <WEIGHT>
10.0

>  <MOL_WEIGHT>
296.41

>  <STRUCT_FORMULA>
C19H24N2O

>  <VENDOR_LOT>
321375

$$$$

          08231011372D 1   1.00000     0.00000     0

 18 19  0     0  0            999 V2000
   -1.3172   -0.4000    0.0000 C   0  0  0  0  0  0           0  0  0
   -0.4310   -0.4000    0.0000 C   0  0  0  0  0  0           0  0  0
   -1.7414    0.3379    0.0000 C   0  0  0  0  0  0           0  0  0
   -1.7586   -1.1483    0.0000 N   0  0  0  0  0  0           0  0  0
    0.0034    0.3379    0.0000 C   0  0  0  0  0  0           0  0  0
   -2.6310    0.3552    0.0000 C   0  0  0  0  0  0           0  0  0
   -1.2931    1.0897    0.0000 O   0  0  0  0  0  0           0  0  0
   -2.6310   -1.1448    0.0000 C   0  0  0  0  0  0           0  0  0
    0.8690    0.3241    0.0000 C   0  0  0  0  0  0           0  0  0
   -3.0690   -0.3828    0.0000 C   0  0  0  0  0  0           0  0  0
   -3.0586   -1.8966    0.0000 C   0  0  0  0  0  0           0  0  0
    1.3207    1.0759    0.0000 C   0  0  0  0  0  0           0  0  0
    1.3034   -0.4241    0.0000 C   0  0  0  0  0  0           0  0  0
    2.1828    1.0655    0.0000 C   0  0  0  0  0  0           0  0  0
    2.1828   -0.4448    0.0000 C   0  0  0  0  0  0           0  0  0
    2.6207    0.3034    0.0000 C   0  0  0  0  0  0           0  0  0
    3.5034    0.3000    0.0000 O   0  0  0  0  0  0           0  0  0
    3.9517    1.0517    0.0000 C   0  0  0  0  0  0           0  0  0
  1  2  1  0     0  0
  1  3  2  0     0  0
  1  4  1  0     0  0
  2  5  1  0     0  0
  3  6  1  0     0  0
  3  7  1  0     0  0
  4  8  2  0     0  0
  5  9  1  0     0  0
  6 10  2  0     0  0
  8 11  1  0     0  0
  9 12  1  0     0  0
  9 13  2  0     0  0
 12 14  2  0     0  0
 13 15  1  0     0  0
 14 16  1  0     0  0
 16 17  1  0     0  0
 17 18  1  0     0  0
  8 10  1  0     0  0
 15 16  2  0     0  0
M  END
>  <IDNUMBER>
BAS 00672331

>  <SALTDATA>
HCl

>  <BOX>
1

>  <CELL>
F2

>  <WEIGHT>
10.0

>  <MOL_WEIGHT>
243.30

>  <STRUCT_FORMULA>
C15H17NO2

>  <VENDOR_LOT>
176144

$$$$

          08231011372D 1   1.00000     0.00000     0

 19 20  0     0  0            999 V2000
    0.1862    0.2379    0.0000 N   0  0  3  0  0  0           0  0  0
   -1.0931   -0.0414    0.0000 C   0  0  0  0  0  0           0  0  0
    1.0448   -0.7207    0.0000 C   0  0  0  0  0  0           0  0  0
    0.8276    1.3655    0.0000 C   0  0  0  0  0  0           0  0  0
   -1.9724    0.9172    0.0000 C   0  0  0  0  0  0           0  0  0
   -1.4931   -1.2828    0.0000 C   0  0  0  0  0  0           0  0  0
    2.2379   -0.1828    0.0000 C   0  0  3  0  0  0           0  0  0
    0.7966   -2.0138    0.0000 O   0  0  0  0  0  0           0  0  0
    2.1172    1.1000    0.0000 C   0  0  0  0  0  0           0  0  0
    0.2862    2.5690    0.0000 O   0  0  0  0  0  0           0  0  0
   -3.2414    0.6483    0.0000 C   0  0  0  0  0  0           0  0  0
   -2.7724   -1.5621    0.0000 C   0  0  0  0  0  0           0  0  0
    3.3966   -0.8207    0.0000 N   0  0  0  0  0  0           0  0  0
   -3.6414   -0.6000    0.0000 C   0  0  0  0  0  0           0  0  0
    4.5276   -0.1414    0.0000 C   0  0  0  0  0  0           0  0  0
   -4.9207   -0.9138    0.0000 O   0  0  0  0  0  0           0  0  0
    4.5069    1.1586    0.0000 C   0  0  0  0  0  0           0  0  0
   -5.2931   -2.1621    0.0000 C   0  0  0  0  0  0           0  0  0
    4.4966    2.4483    0.0000 N   0  0  0  0  0  0           0  0  0
  1  2  1  0     0  0
  1  3  1  0     0  0
  1  4  1  0     0  0
  2  5  1  0     0  0
  2  6  2  0     0  0
  3  7  1  0     0  0
  3  8  2  0     0  0
  4  9  1  0     0  0
  4 10  2  0     0  0
  5 11  2  0     0  0
  6 12  1  0     0  0
  7 13  1  0     0  0
 11 14  1  0     0  0
 13 15  1  0     0  0
 14 16  1  0     0  0
 15 17  1  0     0  0
 16 18  1  0     0  0
 17 19  3  0     0  0
  7  9  1  0     0  0
 12 14  2  0     0  0
M  END
>  <IDNUMBER>
BAS 00866927

>  <BOX>
1

>  <CELL>
F3

>  <WEIGHT>
10.0

>  <MOL_WEIGHT>
259.26

>  <STRUCT_FORMULA>
C13H13N3O3

>  <VENDOR_LOT>
69209

$$$$

          08231011372D 1   1.00000     0.00000     0

 19 21  0     0  0            999 V2000
   -0.1379    0.0586    0.0000 C   0  0  3  0  0  0           0  0  0
   -0.8690   -0.6655    0.0000 C   0  0  3  0  0  0           0  0  0
   -0.5586    1.0724    0.0000 C   0  0  0  0  0  0           0  0  0
    0.9034    0.0586    0.0000 O   0  0  0  0  0  0           0  0  0
    0.6138   -0.6655    0.0000 C   0  0  0  0  0  0           0  0  0
   -0.8690   -1.7414    0.0000 C   0  0  0  0  0  0           0  0  0
    0.1241    2.0000    0.0000 C   0  0  0  0  0  0           0  0  0
   -1.6586    1.2000    0.0000 C   0  0  0  0  0  0           0  0  0
    1.6414   -0.6655    0.0000 C   0  0  0  0  0  0           0  0  0
    1.6414   -1.7414    0.0000 C   0  0  3  0  0  0           0  0  0
   -0.1379   -2.4621    0.0000 C   0  0  0  0  0  0           0  0  0
   -1.8586   -2.1138    0.0000 C   0  0  0  0  0  0           0  0  0
   -0.3586    3.0379    0.0000 C   0  0  0  0  0  0           0  0  0
   -2.1207    2.2207    0.0000 C   0  0  0  0  0  0           0  0  0
    0.9034   -2.4621    0.0000 C   0  0  0  0  0  0           0  0  0
    2.7552   -1.7414    0.0000 C   0  0  0  0  0  0           0  0  0
   -1.4586    3.1379    0.0000 C   0  0  0  0  0  0           0  0  0
    3.3241   -2.6931    0.0000 O   0  0  0  0  0  0           0  0  0
   -1.8966    4.1724    0.0000 O   0  0  0  0  0  0           0  0  0
  1  2  1  0     0  0
  1  3  1  0     0  0
  1  4  1  0     0  0
  2  5  1  0     0  0
  2  6  1  0     0  0
  3  7  2  0     0  0
  3  8  1  0     0  0
  4  9  1  0     0  0
  5 10  1  0     0  0
  6 11  2  0     0  0
  6 12  1  0     0  0
  7 13  1  0     0  0
  8 14  2  0     0  0
 10 15  1  0     0  0
 10 16  1  0     0  0
 13 17  2  0     0  0
 16 18  1  0     0  0
 17 19  1  0     0  0
  9 10  1  0     0  0
 11 15  1  0     0  0
 14 17  1  0     0  0
M  END
>  <IDNUMBER>
BAS 00224608

>  <BOX>
1

>  <CELL>
F4

>  <WEIGHT>
10.0

>  <MOL_WEIGHT>
260.33

>  <STRUCT_FORMULA>
C16H20O3

>  <VENDOR_LOT>
69389

$$$$

          08231011372D 1   1.00000     0.00000     0

 21 23  0     0  0            999 V2000
   -1.8897    0.0207    0.0000 C   0  0  0  0  0  0           0  0  0
   -1.8897    0.8552    0.0000 C   0  0  0  0  0  0           0  0  0
   -1.1724   -0.3931    0.0000 N   0  0  0  0  0  0           0  0  0
   -2.6034   -0.3897    0.0000 C   0  0  0  0  0  0           0  0  0
   -1.1724    1.2724    0.0000 N   0  0  0  0  0  0           0  0  0
   -2.6034    1.2621    0.0000 C   0  0  0  0  0  0           0  0  0
   -0.4517    0.0172    0.0000 C   0  0  0  0  0  0           0  0  0
   -3.3172    0.0241    0.0000 C   0  0  0  0  0  0           0  0  0
   -0.4483    0.8517    0.0000 C   0  0  0  0  0  0           0  0  0
   -3.3172    0.8517    0.0000 C   0  0  0  0  0  0           0  0  0
    0.2621   -0.3966    0.0000 C   0  0  0  0  0  0           0  0  0
    0.2655    1.2621    0.0000 O   0  0  0  0  0  0           0  0  0
    0.9724    0.0207    0.0000 C   0  0  0  0  0  0           0  0  0
    1.6862   -0.3966    0.0000 C   0  0  0  0  0  0           0  0  0
    0.9690    0.8448    0.0000 O   0  0  0  0  0  0           0  0  0
    1.7621   -1.2172    0.0000 C   0  0  0  0  0  0           0  0  0
    2.4345   -0.0621    0.0000 O   0  0  0  0  0  0           0  0  0
    2.5690   -1.3931    0.0000 N   0  0  0  0  0  0           0  0  0
    1.1448   -1.7621    0.0000 C   0  0  0  0  0  0           0  0  0
    2.9862   -0.6759    0.0000 C   0  0  0  0  0  0           0  0  0
    3.8069   -0.5931    0.0000 C   0  0  0  0  0  0           0  0  0
  1  2  1  0     0  0
  1  3  1  0     0  0
  1  4  2  0     0  0
  2  5  1  0     0  0
  2  6  2  0     0  0
  3  7  1  0     0  0
  4  8  1  0     0  0
  5  9  1  0     0  0
  6 10  1  0     0  0
  7 11  2  0     0  0
  9 12  2  0     0  0
 11 13  1  0     0  0
 13 14  1  0     0  0
 13 15  2  0     0  0
 14 16  2  0     0  0
 14 17  1  0     0  0
 16 18  1  0     0  0
 16 19  1  0     0  0
 17 20  1  0     0  0
 20 21  1  0     0  0
  7  9  1  0     0  0
  8 10  2  0     0  0
 18 20  2  0     0  0
M  END
>  <IDNUMBER>
BAS 02239008

>  <BOX>
1

>  <CELL>
F5

>  <WEIGHT>
10.0

>  <MOL_WEIGHT>
283.29

>  <STRUCT_FORMULA>
C15H13N3O3

>  <VENDOR_LOT>
253976

$$$$

          08231011372D 1   1.00000     0.00000     0

 19 20  0     0  0            999 V2000
    1.0655   -0.0379    0.0000 C   0  0  0  0  0  0           0  0  0
    1.8172   -0.1862    0.0000 C   0  0  0  0  0  0           0  0  0
    0.8172    0.7000    0.0000 C   0  0  0  0  0  0           0  0  0
    0.5655   -0.6172    0.0000 C   0  0  0  0  0  0           0  0  0
    2.3448    0.3931    0.0000 C   0  0  0  0  0  0           0  0  0
    1.3241    1.2828    0.0000 C   0  0  0  0  0  0           0  0  0
   -0.1759   -0.4586    0.0000 C   0  0  0  0  0  0           0  0  0
    0.8034   -1.3586    0.0000 O   0  0  0  0  0  0           0  0  0
    2.0966    1.1345    0.0000 C   0  0  0  0  0  0           0  0  0
   -0.6966   -1.0172    0.0000 S   0  0  0  0  0  0           0  0  0
    2.5966    1.7000    0.0000 O   0  0  0  0  0  0           0  0  0
   -1.4759   -0.8379    0.0000 C   0  0  0  0  0  0           0  0  0
    3.3448    1.5621    0.0000 C   0  0  0  0  0  0           0  0  0
   -1.6759   -0.1000    0.0000 N   0  0  0  0  0  0           0  0  0
   -2.0138   -1.4000    0.0000 N   0  0  0  0  0  0           0  0  0
   -2.4138    0.0828    0.0000 C   0  0  0  0  0  0           0  0  0
   -2.7345   -1.2000    0.0000 C   0  0  0  0  0  0           0  0  0
   -2.9552   -0.4793    0.0000 C   0  0  0  0  0  0           0  0  0
   -2.6345    0.8207    0.0000 O   0  0  0  0  0  0           0  0  0
  1  2  1  0     0  0
  1  3  2  0     0  0
  1  4  1  0     0  0
  2  5  2  0     0  0
  3  6  1  0     0  0
  4  7  1  0     0  0
  4  8  2  0     0  0
  5  9  1  0     0  0
  7 10  1  0     0  0
  9 11  1  0     0  0
 10 12  1  0     0  0
 11 13  1  0     0  0
 12 14  2  0     0  0
 12 15  1  0     0  0
 14 16  1  0     0  0
 15 17  2  0     0  0
 16 18  2  0     0  0
 16 19  1  0     0  0
  6  9  2  0     0  0
 17 18  1  0     0  0
M  END
>  <IDNUMBER>
BAS 04360814

>  <BOX>
1

>  <CELL>
F6

>  <WEIGHT>
10.0

>  <MOL_WEIGHT>
276.31

>  <STRUCT_FORMULA>
C13H12N2O3S

>  <VENDOR_LOT>
343122

$$$$

          08231011372D 1   1.00000     0.00000     0

 18 19  0     0  0            999 V2000
   -1.7621   -0.4448    0.0000 N   0  0  3  0  0  0           0  0  0
   -0.5931   -0.4345    0.0000 C   0  0  0  0  0  0           0  0  0
   -2.3414   -1.3966    0.0000 C   0  0  0  0  0  0           0  0  0
   -2.4759    0.4552    0.0000 C   0  0  0  0  0  0           0  0  0
    0.0000   -1.4000    0.0000 C   0  0  0  0  0  0           0  0  0
   -0.0241    0.5862    0.0000 C   0  0  0  0  0  0           0  0  0
   -3.4621   -1.1241    0.0000 C   0  0  0  0  0  0           0  0  0
   -1.8931   -2.4759    0.0000 O   0  0  0  0  0  0           0  0  0
   -3.5414    0.0241    0.0000 C   0  0  0  0  0  0           0  0  0
   -2.1621    1.5862    0.0000 O   0  0  0  0  0  0           0  0  0
    1.1483   -1.4000    0.0000 C   0  0  0  0  0  0           0  0  0
    1.1379    0.5862    0.0000 C   0  0  0  0  0  0           0  0  0
    1.7207   -0.4138    0.0000 C   0  0  0  0  0  0           0  0  0
    2.8586   -0.4138    0.0000 O   0  0  0  0  0  0           0  0  0
    3.4241    0.5759    0.0000 C   0  0  0  0  0  0           0  0  0
    2.8586    1.5552    0.0000 C   0  0  0  0  0  0           0  0  0
    3.3862    2.5759    0.0000 O   0  0  0  0  0  0           0  0  0
    1.7207    1.5552    0.0000 O   0  0  0  0  0  0           0  0  0
  1  2  1  0     0  0
  1  3  1  0     0  0
  1  4  1  0     0  0
  2  5  2  0     0  0
  2  6  1  0     0  0
  3  7  1  0     0  0
  3  8  2  0     0  0
  4  9  1  0     0  0
  4 10  2  0     0  0
  5 11  1  0     0  0
  6 12  2  0     0  0
 11 13  2  0     0  0
 13 14  1  0     0  0
 14 15  1  0     0  0
 15 16  1  0     0  0
 16 17  1  0     0  0
 16 18  2  0     0  0
  7  9  1  0     0  0
 12 13  1  0     0  0
M  END
>  <IDNUMBER>
BAS 00537653

>  <BOX>
1

>  <CELL>
F7

>  <WEIGHT>
10.0

>  <MOL_WEIGHT>
249.22

>  <STRUCT_FORMULA>
C12H11NO5

>  <VENDOR_LOT>
376840

$$$$

          08231011372D 1   1.00000     0.00000     0

 19 20  0     0  0            999 V2000
    1.1966   -0.0172    0.0000 C   0  0  0  0  0  0           0  0  0
    0.4000   -0.2414    0.0000 C   0  0  0  0  0  0           0  0  0
    1.4034    0.7759    0.0000 C   0  0  0  0  0  0           0  0  0
    1.7828   -0.6034    0.0000 C   0  0  0  0  0  0           0  0  0
    0.1931   -1.0345    0.0000 C   0  0  0  0  0  0           0  0  0
   -0.1862    0.3448    0.0000 O   0  0  0  0  0  0           0  0  0
    2.2034    0.9931    0.0000 C   0  0  0  0  0  0           0  0  0
    2.5793   -0.3862    0.0000 C   0  0  0  0  0  0           0  0  0
   -0.6034   -1.2552    0.0000 S   0  0  0  0  0  0           0  0  0
    2.7931    0.4103    0.0000 C   0  0  0  0  0  0           0  0  0
   -1.1897   -0.6759    0.0000 C   0  0  0  0  0  0           0  0  0
    3.5897    0.6276    0.0000 Cl  0  0  0  0  0  0           0  0  0
   -1.9793   -0.8931    0.0000 N   0  0  0  0  0  0           0  0  0
   -0.9793    0.1241    0.0000 N   0  0  0  0  0  0           0  0  0
   -2.5621   -0.3138    0.0000 C   0  0  0  0  0  0           0  0  0
   -1.5655    0.7069    0.0000 C   0  0  0  0  0  0           0  0  0
   -2.3621    0.4759    0.0000 C   0  0  0  0  0  0           0  0  0
   -3.3586   -0.5414    0.0000 C   0  0  0  0  0  0           0  0  0
   -1.3621    1.5069    0.0000 O   0  0  0  0  0  0           0  0  0
  1  2  1  0     0  0
  1  3  1  0     0  0
  1  4  2  0     0  0
  2  5  1  0     0  0
  2  6  2  0     0  0
  3  7  2  0     0  0
  4  8  1  0     0  0
  5  9  1  0     0  0
  7 10  1  0     0  0
  9 11  1  0     0  0
 10 12  1  0     0  0
 11 13  1  0     0  0
 11 14  2  0     0  0
 13 15  2  0     0  0
 14 16  1  0     0  0
 15 17  1  0     0  0
 15 18  1  0     0  0
 16 19  1  0     0  0
  8 10  2  0     0  0
 16 17  2  0     0  0
M  END
>  <IDNUMBER>
BAS 00853818

>  <BOX>
1

>  <CELL>
F8

>  <WEIGHT>
10.0

>  <MOL_WEIGHT>
294.76

>  <STRUCT_FORMULA>
C13H11ClN2O2S

>  <VENDOR_LOT>
98545

$$$$

          08231011372D 1   1.00000     0.00000     0

 19 21  0     0  0            999 V2000
   -0.4276    0.3379    0.0000 C   0  0  0  0  0  0           0  0  0
   -0.4276   -0.4793    0.0000 C   0  0  0  0  0  0           0  0  0
    0.3724    0.5862    0.0000 N   0  0  3  0  0  0           0  0  0
   -1.1276    0.7586    0.0000 C   0  0  0  0  0  0           0  0  0
    0.3586   -0.7414    0.0000 N   0  0  0  0  0  0           0  0  0
   -1.1276   -0.8931    0.0000 N   0  0  3  0  0  0           0  0  0
    0.8448   -0.0793    0.0000 C   0  0  0  0  0  0           0  0  0
    0.7724    1.3069    0.0000 C   0  0  0  0  0  0           0  0  0
   -1.8552    0.3379    0.0000 N   0  0  3  0  0  0           0  0  0
   -1.1414    1.5828    0.0000 O   0  0  0  0  0  0           0  0  0
   -1.8552   -0.4793    0.0000 C   0  0  0  0  0  0           0  0  0
   -1.1276   -1.7138    0.0000 C   0  0  0  0  0  0           0  0  0
    1.6724   -0.0793    0.0000 N   0  0  3  0  0  0           0  0  0
   -2.5586    0.7586    0.0000 C   0  0  0  0  0  0           0  0  0
   -2.5586   -0.8931    0.0000 O   0  0  0  0  0  0           0  0  0
    2.1586   -0.7414    0.0000 C   0  0  0  0  0  0           0  0  0
    2.1448    0.5862    0.0000 C   0  0  0  0  0  0           0  0  0
    2.9414   -0.4793    0.0000 C   0  0  0  0  0  0           0  0  0
    2.9414    0.3379    0.0000 N   0  0  0  0  0  0           0  0  0
  1  2  2  0     0  0
  1  3  1  0     0  0
  1  4  1  0     0  0
  2  5  1  0     0  0
  2  6  1  0     0  0
  3  7  1  0     0  0
  3  8  1  0     0  0
  4  9  1  0     0  0
  4 10  2  0     0  0
  6 11  1  0     0  0
  6 12  1  0     0  0
  7 13  1  0     0  0
  9 14  1  0     0  0
 11 15  2  0     0  0
 13 16  1  0     0  0
 13 17  1  0     0  0
 16 18  2  0     0  0
 17 19  2  0     0  0
  5  7  2  0     0  0
  9 11  1  0     0  0
 18 19  1  0     0  0
M  END
>  <IDNUMBER>
BAS 03818834

>  <BOX>
1

>  <CELL>
F9

>  <WEIGHT>
10.0

>  <MOL_WEIGHT>
260.26

>  <STRUCT_FORMULA>
C11H12N6O2

>  <VENDOR_LOT>
324800

$$$$

          08231011372D 1   1.00000     0.00000     0

 20 21  0     0  0            999 V2000
   -0.8345    0.8897    0.0000 C   0  0  0  0  0  0           0  0  0
   -0.8345    0.0793    0.0000 C   0  0  0  0  0  0           0  0  0
    0.5586    0.8897    0.0000 N   0  0  3  0  0  0           0  0  0
   -1.5241    1.3000    0.0000 C   0  0  0  0  0  0           0  0  0
   -0.1448   -0.3241    0.0000 N   0  0  0  0  0  0           0  0  0
   -1.5241   -0.3207    0.0000 N   0  0  3  0  0  0           0  0  0
    0.5552    0.0759    0.0000 C   0  0  0  0  0  0           0  0  0
    1.2552    1.2931    0.0000 C   0  0  0  0  0  0           0  0  0
   -2.2138    0.8897    0.0000 N   0  0  0  0  0  0           0  0  0
   -1.5345    2.1000    0.0000 O   0  0  0  0  0  0           0  0  0
   -2.2138    0.0793    0.0000 C   0  0  0  0  0  0           0  0  0
   -1.5207   -1.1241    0.0000 C   0  0  0  0  0  0           0  0  0
    1.2483   -0.3310    0.0000 S   0  0  0  0  0  0           0  0  0
    1.9552    0.9000    0.0000 C   0  0  0  0  0  0           0  0  0
   -2.9138   -0.3241    0.0000 O   0  0  0  0  0  0           0  0  0
    1.2414   -1.1379    0.0000 C   0  0  0  0  0  0           0  0  0
    1.9552    0.0931    0.0000 C   0  0  0  0  0  0           0  0  0
    1.9276   -1.5448    0.0000 C   0  0  0  0  0  0           0  0  0
    1.9172   -2.3448    0.0000 C   0  0  0  0  0  0           0  0  0
    2.6552   -1.1379    0.0000 O   0  0  0  0  0  0           0  0  0
  1  2  2  0     0  0
  1  3  1  0     0  0
  1  4  1  0     0  0
  2  5  1  0     0  0
  2  6  1  0     0  0
  3  7  1  0     0  0
  3  8  1  0     0  0
  4  9  1  0     0  0
  4 10  2  0     0  0
  6 11  1  0     0  0
  6 12  1  0     0  0
  7 13  1  0     0  0
  8 14  1  0     0  0
 11 15  2  0     0  0
 13 16  1  0     0  0
 14 17  2  0     0  0
 16 18  1  0     0  0
 18 19  1  0     0  0
 18 20  2  0     0  0
  5  7  2  0     0  0
  9 11  1  0     0  0
M  END
>  <IDNUMBER>
BAS 00620133

>  <BOX>
1

>  <CELL>
F10

>  <WEIGHT>
10.0

>  <MOL_WEIGHT>
294.33

>  <STRUCT_FORMULA>
C12H14N4O3S

>  <VENDOR_LOT>
172292

$$$$

          08231011372D 1   1.00000     0.00000     0

 15 16  0     0  0            999 V2000
   -0.5414   -0.5483    0.0000 C   0  0  0  0  0  0           0  0  0
   -0.5414    0.3724    0.0000 C   0  0  0  0  0  0           0  0  0
    0.2586   -1.0276    0.0000 O   0  0  0  0  0  0           0  0  0
   -1.3207   -1.0276    0.0000 C   0  0  0  0  0  0           0  0  0
    0.2586    0.8345    0.0000 C   0  0  0  0  0  0           0  0  0
   -1.3207    0.8345    0.0000 C   0  0  0  0  0  0           0  0  0
    1.0586   -0.5483    0.0000 C   0  0  0  0  0  0           0  0  0
   -2.1207   -0.5483    0.0000 C   0  0  0  0  0  0           0  0  0
    1.0586    0.3724    0.0000 C   0  0  0  0  0  0           0  0  0
   -2.1207    0.3724    0.0000 C   0  0  0  0  0  0           0  0  0
    1.8793   -1.0276    0.0000 O   0  0  0  0  0  0           0  0  0
   -2.9414   -1.0276    0.0000 O   0  0  0  0  0  0           0  0  0
    1.8793    0.8345    0.0000 C   0  0  0  0  0  0           0  0  0
    2.6586    0.3724    0.0000 C   0  0  0  0  0  0           0  0  0
    1.8793    1.7724    0.0000 O   0  0  0  0  0  0           0  0  0
  1  2  2  0     0  0
  1  3  1  0     0  0
  1  4  1  0     0  0
  2  5  1  0     0  0
  2  6  1  0     0  0
  3  7  1  0     0  0
  4  8  2  0     0  0
  5  9  2  0     0  0
  6 10  2  0     0  0
  7 11  2  0     0  0
  8 12  1  0     0  0
  9 13  1  0     0  0
 13 14  1  0     0  0
 13 15  2  0     0  0
  7  9  1  0     0  0
  8 10  1  0     0  0
M  END
>  <IDNUMBER>
BAS 00140039

>  <BOX>
1

>  <CELL>
F11

>  <WEIGHT>
10.0

>  <MOL_WEIGHT>
204.18

>  <STRUCT_FORMULA>
C11H8O4

>  <VENDOR_LOT>
39448

$$$$

          08231011372D 1   1.00000     0.00000     0

 15 15  0     0  0            999 V2000
   -2.4034   -0.1379    0.0000 N   0  0  3  0  0  0           0  0  0
   -3.7414   -0.7034    0.0000 C   0  0  0  0  0  0           0  0  0
   -2.5655    1.2966    0.0000 C   0  0  0  0  0  0           0  0  0
   -1.1655   -0.8414    0.0000 C   0  0  0  0  0  0           0  0  0
   -4.7034    0.3586    0.0000 C   0  0  0  0  0  0           0  0  0
   -4.0414   -2.1241    0.0000 O   0  0  0  0  0  0           0  0  0
   -3.9793    1.6069    0.0000 S   0  0  0  0  0  0           0  0  0
   -1.4931    2.2586    0.0000 S   0  0  0  0  0  0           0  0  0
    0.0724   -0.1379    0.0000 C   0  0  0  0  0  0           0  0  0
    1.3172   -0.8414    0.0000 C   0  0  0  0  0  0           0  0  0
    2.5690   -0.1379    0.0000 C   0  0  0  0  0  0           0  0  0
    3.7966   -0.8414    0.0000 C   0  0  0  0  0  0           0  0  0
    5.0345   -0.1414    0.0000 C   0  0  0  0  0  0           0  0  0
    6.2690   -0.8655    0.0000 O   0  0  0  0  0  0           0  0  0
    5.0345    1.2586    0.0000 O   0  0  0  0  0  0           0  0  0
  1  2  1  0     0  0
  1  3  1  0     0  0
  1  4  1  0     0  0
  2  5  1  0     0  0
  2  6  2  0     0  0
  3  7  1  0     0  0
  3  8  2  0     0  0
  4  9  1  0     0  0
  9 10  1  0     0  0
 10 11  1  0     0  0
 11 12  1  0     0  0
 12 13  1  0     0  0
 13 14  1  0     0  0
 13 15  2  0     0  0
  5  7  1  0     0  0
M  END
>  <IDNUMBER>
BAS 00009567

>  <BOX>
1

>  <CELL>
F12

>  <WEIGHT>
10.0

>  <MOL_WEIGHT>
247.34

>  <STRUCT_FORMULA>
C9H13NO3S2

>  <VENDOR_LOT>
119462

$$$$

          08231011372D 1   1.00000     0.00000     0

 19 20  0     0  0            999 V2000
   -1.5276    0.1655    0.0000 C   0  0  3  0  0  0           0  0  0
   -1.5138    0.9207    0.0000 C   0  0  3  0  0  0           0  0  0
   -0.8138   -0.0793    0.0000 C   0  0  0  0  0  0           0  0  0
   -2.1897   -0.1966    0.0000 C   0  0  0  0  0  0           0  0  0
   -0.8552    1.1414    0.0000 C   0  0  0  0  0  0           0  0  0
   -2.1621    1.3069    0.0000 C   0  0  0  0  0  0           0  0  0
   -0.3621    0.5310    0.0000 N   0  0  3  0  0  0           0  0  0
   -0.8414   -0.9586    0.0000 O   0  0  0  0  0  0           0  0  0
   -2.8310    0.1828    0.0000 C   0  0  0  0  0  0           0  0  0
   -0.8621    1.9034    0.0000 O   0  0  0  0  0  0           0  0  0
   -2.8172    0.9414    0.0000 C   0  0  0  0  0  0           0  0  0
    0.3862    0.5414    0.0000 C   0  0  0  0  0  0           0  0  0
    0.7724   -0.1069    0.0000 C   0  0  0  0  0  0           0  0  0
    1.5241   -0.0966    0.0000 C   0  0  0  0  0  0           0  0  0
    1.9103   -0.7345    0.0000 C   0  0  0  0  0  0           0  0  0
    2.6621   -0.7207    0.0000 C   0  0  0  0  0  0           0  0  0
    3.0448   -1.3690    0.0000 C   0  0  0  0  0  0           0  0  0
    2.6828   -2.0207    0.0000 O   0  0  0  0  0  0           0  0  0
    3.7931   -1.3586    0.0000 O   0  0  0  0  0  0           0  0  0
  1  2  1  0     0  0
  1  3  1  0     0  0
  1  4  1  0     0  0
  2  5  1  0     0  0
  2  6  1  0     0  0
  3  7  1  0     0  0
  3  8  2  0     0  0
  4  9  1  0     0  0
  5 10  2  0     0  0
  6 11  1  0     0  0
  7 12  1  0     0  0
 12 13  1  0     0  0
 13 14  1  0     0  0
 14 15  1  0     0  0
 15 16  1  0     0  0
 16 17  1  0     0  0
 17 18  1  0     0  0
 17 19  2  0     0  0
  5  7  1  0     0  0
  9 11  1  0     0  0
M  END
>  <IDNUMBER>
BAS 00511990

>  <BOX>
1

>  <CELL>
G1

>  <WEIGHT>
10.0

>  <MOL_WEIGHT>
267.32

>  <STRUCT_FORMULA>
C14H21NO4

>  <VENDOR_LOT>
117238

$$$$

          08231011372D 1   1.00000     0.00000     0

 22 24  0     0  0            999 V2000
   -1.7552    1.9483    0.0000 C   0  0  0  0  0  0           0  0  0
   -1.4276    1.3241    0.0000 C   0  0  0  0  0  0           0  0  0
   -2.3724    1.9724    0.0000 N   0  0  3  0  0  0           0  0  0
   -1.4276    2.4690    0.0000 C   0  0  0  0  0  0           0  0  0
   -0.3655    0.7034    0.0000 C   0  0  0  0  0  0           0  0  0
   -1.7793    0.7103    0.0000 N   0  0  0  0  0  0           0  0  0
   -2.6586    2.5172    0.0000 C   0  0  0  0  0  0           0  0  0
   -2.7483    1.3724    0.0000 C   0  0  0  0  0  0           0  0  0
   -2.3276    3.0414    0.0000 C   0  0  0  0  0  0           0  0  0
   -0.7241    0.0966    0.0000 C   0  0  0  0  0  0           0  0  0
   -1.4276    0.1000    0.0000 N   0  0  0  0  0  0           0  0  0
   -0.3724   -0.5172    0.0000 C   0  0  0  0  0  0           0  0  0
    0.3310   -0.5172    0.0000 N   0  0  0  0  0  0           0  0  0
   -0.7310   -1.1276    0.0000 O   0  0  0  0  0  0           0  0  0
    1.1069   -0.9724    0.0000 N   0  0  0  0  0  0           0  0  0
    1.8724   -0.8621    0.0000 C   0  0  0  0  0  0           0  0  0
    2.3345   -1.4517    0.0000 C   0  0  0  0  0  0           0  0  0
    2.0586   -2.1483    0.0000 C   0  0  0  0  0  0           0  0  0
    3.0793   -1.3483    0.0000 C   0  0  0  0  0  0           0  0  0
    2.5241   -2.7379    0.0000 C   0  0  0  0  0  0           0  0  0
    3.5448   -1.9379    0.0000 C   0  0  0  0  0  0           0  0  0
    3.2621   -2.6345    0.0000 N   0  0  0  0  0  0           0  0  0
  1  2  1  0     0  0
  1  3  1  0     0  0
  1  4  2  0     0  0
  2  5  1  0     0  0
  2  6  2  0     0  0
  3  7  1  0     0  0
  3  8  1  0     0  0
  4  9  1  0     0  0
  5 10  2  0     0  0
  6 11  1  0     0  0
 10 12  1  0     0  0
 12 13  1  0     0  0
 12 14  2  0     0  0
 13 15  1  0     0  0
 15 16  2  0     0  0
 16 17  1  0     0  0
 17 18  2  0     0  0
 17 19  1  0     0  0
 18 20  1  0     0  0
 19 21  2  0     0  0
 20 22  2  0     0  0
  7  9  2  0     0  0
 10 11  1  0     0  0
 21 22  1  0     0  0
M  END
>  <IDNUMBER>
BAS 01858801

>  <BOX>
1

>  <CELL>
G2

>  <WEIGHT>
10.0

>  <MOL_WEIGHT>
294.32

>  <STRUCT_FORMULA>
C15H14N6O

>  <VENDOR_LOT>
231299

$$$$

          08231011372D 1   1.00000     0.00000     0

 20 22  0     0  0            999 V2000
   -1.3586   -0.1828    0.0000 C   0  0  3  0  0  0           0  0  0
   -2.0759   -0.5966    0.0000 C   0  0  0  0  0  0           0  0  0
   -0.6448   -0.5966    0.0000 C   0  0  0  0  0  0           0  0  0
   -1.3586    0.6414    0.0000 C   0  0  0  0  0  0           0  0  0
   -2.8448   -0.2966    0.0000 C   0  0  0  0  0  0           0  0  0
   -2.1241   -1.4207    0.0000 O   0  0  0  0  0  0           0  0  0
    0.0690   -0.1828    0.0000 C   0  0  0  0  0  0           0  0  0
   -0.6448    1.0552    0.0000 C   0  0  0  0  0  0           0  0  0
   -3.3690   -0.9310    0.0000 C   0  0  0  0  0  0           0  0  0
   -2.9207   -1.6276    0.0000 C   0  0  0  0  0  0           0  0  0
    0.7931   -0.6069    0.0000 N   0  0  0  0  0  0           0  0  0
    0.0690    0.6414    0.0000 C   0  0  0  0  0  0           0  0  0
   -0.6448    1.8793    0.0000 O   0  0  0  0  0  0           0  0  0
    1.5138   -0.2034    0.0000 C   0  0  0  0  0  0           0  0  0
    2.2241   -0.6207    0.0000 C   0  0  0  0  0  0           0  0  0
    1.5172    0.6172    0.0000 C   0  0  0  0  0  0           0  0  0
    2.9414   -0.2207    0.0000 C   0  0  0  0  0  0           0  0  0
    2.2414    1.0310    0.0000 C   0  0  0  0  0  0           0  0  0
    2.9517    0.6034    0.0000 C   0  0  0  0  0  0           0  0  0
    3.6690    1.0103    0.0000 O   0  0  0  0  0  0           0  0  0
  1  2  1  0     0  0
  1  3  1  0     0  0
  1  4  1  0     0  0
  2  5  2  0     0  0
  2  6  1  0     0  0
  3  7  1  0     0  0
  4  8  1  0     0  0
  5  9  1  0     0  0
  6 10  1  0     0  0
  7 11  1  0     0  0
  7 12  2  0     0  0
  8 13  2  0     0  0
 11 14  1  0     0  0
 14 15  2  0     0  0
 14 16  1  0     0  0
 15 17  1  0     0  0
 16 18  2  0     0  0
 17 19  2  0     0  0
 19 20  1  0     0  0
  8 12  1  0     0  0
  9 10  2  0     0  0
 18 19  1  0     0  0
M  END
>  <IDNUMBER>
BAS 02026060

>  <BOX>
1

>  <CELL>
G3

>  <WEIGHT>
10.0

>  <MOL_WEIGHT>
269.30

>  <STRUCT_FORMULA>
C16H15NO3

>  <VENDOR_LOT>
365474

$$$$

          08231011372D 1   1.00000     0.00000     0

 19 20  0     0  0            999 V2000
    0.6828   -0.1759    0.0000 C   0  0  0  0  0  0           0  0  0
    1.0690   -0.1759    0.0000 N   0  0  0  0  0  0           0  0  0
    0.4724   -0.5034    0.0000 N   0  0  0  0  0  0           0  0  0
    0.4724    0.1621    0.0000 S   0  0  0  0  0  0           0  0  0
    1.2621   -0.5034    0.0000 C   0  0  0  0  0  0           0  0  0
    0.6828   -0.8517    0.0000 C   0  0  0  0  0  0           0  0  0
    0.0862    0.1621    0.0000 C   0  0  0  0  0  0           0  0  0
    1.0690   -0.8517    0.0000 C   0  0  0  0  0  0           0  0  0
    1.6483   -0.5034    0.0000 C   0  0  0  0  0  0           0  0  0
    0.4724   -1.1862    0.0000 O   0  0  0  0  0  0           0  0  0
   -0.1034    0.4862    0.0000 S   0  0  0  0  0  0           0  0  0
   -0.4897    0.4862    0.0000 C   0  0  0  0  0  0           0  0  0
   -0.6897    0.8241    0.0000 N   0  0  0  0  0  0           0  0  0
   -0.6897    0.1621    0.0000 N   0  0  0  0  0  0           0  0  0
   -1.0759    0.8345    0.0000 C   0  0  0  0  0  0           0  0  0
   -1.0759    0.1621    0.0000 C   0  0  0  0  0  0           0  0  0
   -1.2655    0.4862    0.0000 C   0  0  0  0  0  0           0  0  0
   -1.2655    1.1828    0.0000 C   0  0  0  0  0  0           0  0  0
   -1.2655   -0.1897    0.0000 O   0  0  0  0  0  0           0  0  0
  1  2  1  0     0  0
  1  3  2  0     0  0
  1  4  1  0     0  0
  2  5  2  0     0  0
  3  6  1  0     0  0
  4  7  1  0     0  0
  5  8  1  0     0  0
  5  9  1  0     0  0
  6 10  1  0     0  0
  7 11  1  0     0  0
 11 12  1  0     0  0
 12 13  2  0     0  0
 12 14  1  0     0  0
 13 15  1  0     0  0
 14 16  2  0     0  0
 15 17  2  0     0  0
 15 18  1  0     0  0
 16 19  1  0     0  0
  6  8  2  0     0  0
 16 17  1  0     0  0
M  END
>  <IDNUMBER>
BAS 00279727

>  <BOX>
1

>  <CELL>
G4

>  <WEIGHT>
10.0

>  <MOL_WEIGHT>
296.37

>  <STRUCT_FORMULA>
C11H12N4O2S2

>  <VENDOR_LOT>
47744

$$$$

          08231011372D 1   1.00000     0.00000     0

 22 24  0     0  0            999 V2000
    0.0793   -0.7379    0.0000 C   0  0  3  0  0  0           0  0  0
   -0.8000   -1.2586    0.0000 C   0  0  0  0  0  0           0  0  0
    0.0793    0.3310    0.0000 C   0  0  0  0  0  0           0  0  0
    1.0241   -1.2586    0.0000 C   0  0  0  0  0  0           0  0  0
   -0.8000   -2.3103    0.0000 C   0  0  0  0  0  0           0  0  0
   -1.8000   -0.9379    0.0000 C   0  0  0  0  0  0           0  0  0
    1.0000    0.8483    0.0000 C   0  0  0  0  0  0           0  0  0
   -0.8276    0.8483    0.0000 C   0  0  0  0  0  0           0  0  0
    1.0241   -2.3103    0.0000 C   0  0  0  0  0  0           0  0  0
    1.9310   -0.7103    0.0000 C   0  0  0  0  0  0           0  0  0
    0.0793   -2.8310    0.0000 O   0  0  0  0  0  0           0  0  0
   -1.8000   -2.6172    0.0000 N   0  0  0  0  0  0           0  0  0
   -2.4000   -1.7586    0.0000 N   0  0  0  0  0  0           0  0  0
   -2.1207    0.0828    0.0000 C   0  0  0  0  0  0           0  0  0
    1.0000    1.9000    0.0000 C   0  0  0  0  0  0           0  0  0
   -0.8483    1.9000    0.0000 C   0  0  0  0  0  0           0  0  0
    1.9310   -2.8310    0.0000 N   0  0  0  0  0  0           0  0  0
    2.8655   -0.1690    0.0000 N   0  0  0  0  0  0           0  0  0
    0.0793    2.4207    0.0000 C   0  0  0  0  0  0           0  0  0
    0.0931    3.4621    0.0000 N   0  0  3  0  0  0           0  0  0
    0.9931    3.9621    0.0000 C   0  0  0  0  0  0           0  0  0
   -0.8000    3.9690    0.0000 C   0  0  0  0  0  0           0  0  0
  1  2  1  0     0  0
  1  3  1  0     0  0
  1  4  1  0     0  0
  2  5  2  0     0  0
  2  6  1  0     0  0
  3  7  2  0     0  0
  3  8  1  0     0  0
  4  9  2  0     0  0
  4 10  1  0     0  0
  5 11  1  0     0  0
  5 12  1  0     0  0
  6 13  2  0     0  0
  6 14  1  0     0  0
  7 15  1  0     0  0
  8 16  2  0     0  0
  9 17  1  0     0  0
 10 18  3  0     0  0
 15 19  2  0     0  0
 19 20  1  0     0  0
 20 21  1  0     0  0
 20 22  1  0     0  0
  9 11  1  0     0  0
 12 13  1  0     0  0
 16 19  1  0     0  0
M  END
>  <IDNUMBER>
BAS 02072957

>  <BOX>
1

>  <CELL>
G5

>  <WEIGHT>
10.0

>  <MOL_WEIGHT>
295.34

>  <STRUCT_FORMULA>
C16H17N5O

>  <VENDOR_LOT>
230101

$$$$

          08231011372D 1   1.00000     0.00000     0

 20 21  0     0  0            999 V2000
    0.4517    0.3034    0.0000 N   0  0  3  0  0  0           0  0  0
   -0.6586    0.0621    0.0000 C   0  0  0  0  0  0           0  0  0
    1.2000   -0.5241    0.0000 C   0  0  0  0  0  0           0  0  0
    1.0103    1.2897    0.0000 C   0  0  0  0  0  0           0  0  0
   -1.0069   -1.0172    0.0000 C   0  0  0  0  0  0           0  0  0
   -1.4276    0.9034    0.0000 C   0  0  0  0  0  0           0  0  0
    2.2310   -0.0586    0.0000 C   0  0  3  0  0  0           0  0  0
    0.9793   -1.6448    0.0000 O   0  0  0  0  0  0           0  0  0
    2.1310    1.0552    0.0000 C   0  0  0  0  0  0           0  0  0
    0.5414    2.3345    0.0000 O   0  0  0  0  0  0           0  0  0
   -2.1207   -1.2586    0.0000 C   0  0  0  0  0  0           0  0  0
   -2.5276    0.6621    0.0000 C   0  0  0  0  0  0           0  0  0
    3.2414   -0.6172    0.0000 N   0  0  0  0  0  0           0  0  0
   -2.8793   -0.4310    0.0000 C   0  0  0  0  0  0           0  0  0
    4.2207   -0.0310    0.0000 C   0  0  0  0  0  0           0  0  0
   -3.9897   -0.6586    0.0000 O   0  0  0  0  0  0           0  0  0
    4.2000    1.1034    0.0000 C   0  0  0  0  0  0           0  0  0
   -4.3414   -1.7379    0.0000 C   0  0  0  0  0  0           0  0  0
    4.1931    2.2345    0.0000 N   0  0  0  0  0  0           0  0  0
   -5.4414   -1.9655    0.0000 C   0  0  0  0  0  0           0  0  0
  1  2  1  0     0  0
  1  3  1  0     0  0
  1  4  1  0     0  0
  2  5  2  0     0  0
  2  6  1  0     0  0
  3  7  1  0     0  0
  3  8  2  0     0  0
  4  9  1  0     0  0
  4 10  2  0     0  0
  5 11  1  0     0  0
  6 12  2  0     0  0
  7 13  1  0     0  0
 11 14  2  0     0  0
 13 15  1  0     0  0
 14 16  1  0     0  0
 15 17  1  0     0  0
 16 18  1  0     0  0
 17 19  3  0     0  0
 18 20  1  0     0  0
  7  9  1  0     0  0
 12 14  1  0     0  0
M  END
>  <IDNUMBER>
BAS 00866933

>  <BOX>
1

>  <CELL>
G6

>  <WEIGHT>
10.0

>  <MOL_WEIGHT>
273.29

>  <STRUCT_FORMULA>
C14H15N3O3

>  <VENDOR_LOT>
186331

$$$$

          08231011372D 1   1.00000     0.00000     0

 17 18  0     0  0            999 V2000
   -1.0621    0.1931    0.0000 C   0  0  0  0  0  0           0  0  0
   -0.3379   -0.2103    0.0000 C   0  0  0  0  0  0           0  0  0
   -1.0759    1.0138    0.0000 C   0  0  0  0  0  0           0  0  0
   -1.7621   -0.2103    0.0000 N   0  0  0  0  0  0           0  0  0
    0.3759    0.2138    0.0000 C   0  0  0  0  0  0           0  0  0
   -1.7621    1.4138    0.0000 C   0  0  0  0  0  0           0  0  0
   -0.3621    1.4586    0.0000 O   0  0  0  0  0  0           0  0  0
   -2.4759    0.1931    0.0000 C   0  0  0  0  0  0           0  0  0
    1.0966   -0.1862    0.0000 C   0  0  0  0  0  0           0  0  0
   -2.4759    1.0069    0.0000 C   0  0  0  0  0  0           0  0  0
   -3.2034   -0.2103    0.0000 C   0  0  0  0  0  0           0  0  0
    1.7966    0.2414    0.0000 C   0  0  0  0  0  0           0  0  0
    1.1138   -1.0069    0.0000 C   0  0  0  0  0  0           0  0  0
    2.5138   -0.1586    0.0000 C   0  0  0  0  0  0           0  0  0
    1.8379   -1.4069    0.0000 C   0  0  0  0  0  0           0  0  0
    2.5379   -0.9862    0.0000 C   0  0  0  0  0  0           0  0  0
    3.2448   -1.3724    0.0000 O   0  0  0  0  0  0           0  0  0
  1  2  1  0     0  0
  1  3  2  0     0  0
  1  4  1  0     0  0
  2  5  1  0     0  0
  3  6  1  0     0  0
  3  7  1  0     0  0
  4  8  2  0     0  0
  5  9  1  0     0  0
  6 10  2  0     0  0
  8 11  1  0     0  0
  9 12  1  0     0  0
  9 13  2  0     0  0
 12 14  2  0     0  0
 13 15  1  0     0  0
 14 16  1  0     0  0
 16 17  1  0     0  0
  8 10  1  0     0  0
 15 16  2  0     0  0
M  END
>  <IDNUMBER>
BAS 01416480

>  <SALTDATA>
HCl

>  <BOX>
1

>  <CELL>
G7

>  <WEIGHT>
10.0

>  <MOL_WEIGHT>
229.28

>  <STRUCT_FORMULA>
C14H15NO2

>  <VENDOR_LOT>
180882

$$$$

          08231011372D 1   1.00000     0.00000     0

 19 20  0     0  0            999 V2000
    0.2207   -0.8793    0.0000 C   0  0  0  0  0  0           0  0  0
   -0.8483   -1.5414    0.0000 C   0  0  0  0  0  0           0  0  0
    0.2103    0.3586    0.0000 C   0  0  0  0  0  0           0  0  0
    1.2586   -1.4621    0.0000 C   0  0  0  0  0  0           0  0  0
   -1.9241   -0.9483    0.0000 C   0  0  0  0  0  0           0  0  0
    1.2586    0.9724    0.0000 C   0  0  0  0  0  0           0  0  0
    2.3276   -0.8621    0.0000 C   0  0  0  0  0  0           0  0  0
   -2.9621   -1.6103    0.0000 C   0  0  0  0  0  0           0  0  0
   -2.2103    0.2207    0.0000 S   0  0  0  0  0  0           0  0  0
    2.3276    0.3724    0.0000 C   0  0  0  0  0  0           0  0  0
    1.2276    2.2000    0.0000 O   0  0  0  0  0  0           0  0  0
   -3.8897   -0.8000    0.0000 N   0  0  0  0  0  0           0  0  0
   -3.0793   -2.8172    0.0000 O   0  0  0  0  0  0           0  0  0
   -3.4241    0.3207    0.0000 C   0  0  0  0  0  0           0  0  0
    3.4103    0.9828    0.0000 O   0  0  0  0  0  0           0  0  0
    0.1724    2.8000    0.0000 C   0  0  0  0  0  0           0  0  0
   -4.0897    1.3586    0.0000 S   0  0  0  0  0  0           0  0  0
    4.4759    0.3586    0.0000 C   0  0  0  0  0  0           0  0  0
    5.5379    0.9724    0.0000 C   0  0  0  0  0  0           0  0  0
  1  2  1  0     0  0
  1  3  1  0     0  0
  1  4  2  0     0  0
  2  5  2  0     0  0
  3  6  2  0     0  0
  4  7  1  0     0  0
  5  8  1  0     0  0
  5  9  1  0     0  0
  6 10  1  0     0  0
  6 11  1  0     0  0
  8 12  1  0     0  0
  8 13  2  0     0  0
  9 14  1  0     0  0
 10 15  1  0     0  0
 11 16  1  0     0  0
 14 17  2  0     0  0
 15 18  1  0     0  0
 18 19  1  0     0  0
  7 10  2  0     0  0
 12 14  1  0     0  0
M  END
>  <IDNUMBER>
BAS 00436688

>  <BOX>
1

>  <CELL>
G8

>  <WEIGHT>
10.0

>  <MOL_WEIGHT>
295.38

>  <STRUCT_FORMULA>
C13H13NO3S2

>  <VENDOR_LOT>
167033

$$$$

          08231011372D 1   1.00000     0.00000     0

 15 16  0     0  0            999 V2000
   -1.2103   -0.2276    0.0000 C   0  0  0  0  0  0           0  0  0
   -0.5138   -0.9897    0.0000 C   0  0  0  0  0  0           0  0  0
   -2.2345   -0.2448    0.0000 S   0  0  0  0  0  0           0  0  0
   -0.8862    0.7414    0.0000 C   0  0  0  0  0  0           0  0  0
    0.4862   -0.7793    0.0000 C   0  0  0  0  0  0           0  0  0
   -2.5483    0.7310    0.0000 C   0  0  0  0  0  0           0  0  0
   -1.7103    1.3310    0.0000 N   0  0  0  0  0  0           0  0  0
    0.1345    1.0931    0.0000 O   0  0  0  0  0  0           0  0  0
    0.8034    0.1931    0.0000 C   0  0  0  0  0  0           0  0  0
    1.1897   -1.5276    0.0000 C   0  0  0  0  0  0           0  0  0
   -3.5345    1.0586    0.0000 O   0  0  0  0  0  0           0  0  0
    1.8034    0.4103    0.0000 C   0  0  0  0  0  0           0  0  0
    2.1862   -1.3069    0.0000 C   0  0  0  0  0  0           0  0  0
    2.5138   -0.3414    0.0000 C   0  0  0  0  0  0           0  0  0
    3.5138   -0.1276    0.0000 O   0  0  0  0  0  0           0  0  0
  1  2  2  0     0  0
  1  3  1  0     0  0
  1  4  1  0     0  0
  2  5  1  0     0  0
  3  6  1  0     0  0
  4  7  1  0     0  0
  4  8  2  0     0  0
  5  9  1  0     0  0
  5 10  2  0     0  0
  6 11  2  0     0  0
  9 12  2  0     0  0
 10 13  1  0     0  0
 12 14  1  0     0  0
 14 15  1  0     0  0
  6  7  1  0     0  0
 13 14  2  0     0  0
M  END
>  <IDNUMBER>
BAS 00534107

>  <BOX>
1

>  <CELL>
G9

>  <WEIGHT>
10.0

>  <MOL_WEIGHT>
221.24

>  <STRUCT_FORMULA>
C10H7NO3S

>  <VENDOR_LOT>
39424

$$$$

          08231011372D 1   1.00000     0.00000     0

 21 23  0     0  0            999 V2000
   -2.6690    0.0966    0.0000 C   0  0  0  0  0  0           0  0  0
   -2.1310   -0.8655    0.0000 C   0  0  0  0  0  0           0  0  0
   -1.9310    0.8966    0.0000 C   0  0  0  0  0  0           0  0  0
   -3.7517    0.0966    0.0000 C   0  0  0  0  0  0           0  0  0
   -1.0690   -0.6241    0.0000 C   0  0  0  0  0  0           0  0  0
   -2.6690   -1.8034    0.0000 C   0  0  0  0  0  0           0  0  0
   -0.9517    0.4552    0.0000 C   0  0  0  0  0  0           0  0  0
   -2.1103    1.9966    0.0000 O   0  0  0  0  0  0           0  0  0
   -4.2897   -0.8655    0.0000 C   0  0  0  0  0  0           0  0  0
   -0.2310   -1.3448    0.0000 O   0  0  0  0  0  0           0  0  0
   -3.7690   -1.7862    0.0000 C   0  0  0  0  0  0           0  0  0
    0.0103    0.9966    0.0000 C   0  0  0  0  0  0           0  0  0
    0.9690    0.4345    0.0000 N   0  0  0  0  0  0           0  0  0
    0.0103    2.0759    0.0000 C   0  0  0  0  0  0           0  0  0
    1.9103    0.9759    0.0000 C   0  0  0  0  0  0           0  0  0
    2.8483    0.4345    0.0000 C   0  0  0  0  0  0           0  0  0
    2.8310   -0.6655    0.0000 C   0  0  0  0  0  0           0  0  0
    3.7897    0.9759    0.0000 C   0  0  0  0  0  0           0  0  0
    3.7690   -1.2034    0.0000 C   0  0  0  0  0  0           0  0  0
    4.7310    0.4138    0.0000 C   0  0  0  0  0  0           0  0  0
    4.7103   -0.6862    0.0000 N   0  0  0  0  0  0           0  0  0
  1  2  2  0     0  0
  1  3  1  0     0  0
  1  4  1  0     0  0
  2  5  1  0     0  0
  2  6  1  0     0  0
  3  7  1  0     0  0
  3  8  2  0     0  0
  4  9  2  0     0  0
  5 10  2  0     0  0
  6 11  2  0     0  0
  7 12  2  0     0  0
 12 13  1  0     0  0
 12 14  1  0     0  0
 13 15  1  0     0  0
 15 16  1  0     0  0
 16 17  2  0     0  0
 16 18  1  0     0  0
 17 19  1  0     0  0
 18 20  2  0     0  0
 19 21  2  0     0  0
  5  7  1  0     0  0
  9 11  1  0     0  0
 20 21  1  0     0  0
M  END
>  <IDNUMBER>
BAS 01257277

>  <BOX>
1

>  <CELL>
G10

>  <WEIGHT>
10.0

>  <MOL_WEIGHT>
278.31

>  <STRUCT_FORMULA>
C17H14N2O2

>  <VENDOR_LOT>
225640

$$$$

          08231011372D 1   1.00000     0.00000     0

 18 19  0     0  0            999 V2000
    0.0862   -0.0897    0.0000 C   0  0  3  0  0  0           0  0  0
    0.3414    0.7000    0.0000 C   0  0  0  0  0  0           0  0  0
    0.7552   -0.5724    0.0000 N   0  0  3  0  0  0           0  0  0
   -0.7000   -0.3414    0.0000 C   0  0  0  0  0  0           0  0  0
    1.1690    0.7000    0.0000 C   0  0  0  0  0  0           0  0  0
   -0.1414    1.3655    0.0000 C   0  0  0  0  0  0           0  0  0
    1.4241   -0.0897    0.0000 C   0  0  0  0  0  0           0  0  0
    0.7552   -1.3966    0.0000 C   0  0  0  0  0  0           0  0  0
   -1.2862    0.2448    0.0000 C   0  0  0  0  0  0           0  0  0
   -0.9103   -1.1379    0.0000 C   0  0  0  0  0  0           0  0  0
    1.6517    1.3655    0.0000 O   0  0  0  0  0  0           0  0  0
   -0.9448    1.1586    0.0000 C   0  0  0  0  0  0           0  0  0
    0.1345    2.1414    0.0000 O   0  0  0  0  0  0           0  0  0
    2.2069   -0.3448    0.0000 O   0  0  0  0  0  0           0  0  0
    1.5517   -1.6069    0.0000 O   0  0  0  0  0  0           0  0  0
   -2.0828    0.0310    0.0000 C   0  0  0  0  0  0           0  0  0
   -1.7103   -1.3552    0.0000 N   0  0  0  0  0  0           0  0  0
   -2.3000   -0.7690    0.0000 C   0  0  0  0  0  0           0  0  0
  1  2  1  0     0  0
  1  3  1  0     0  0
  1  4  1  0     0  0
  2  5  2  0     0  0
  2  6  1  0     0  0
  3  7  1  0     0  0
  3  8  1  0     0  0
  4  9  2  0     0  0
  4 10  1  0     0  0
  5 11  1  0     0  0
  6 12  1  0     0  0
  6 13  2  0     0  0
  7 14  2  0     0  0
  8 15  1  0     0  0
  9 16  1  0     0  0
 10 17  2  0     0  0
 16 18  2  0     0  0
  5  7  1  0     0  0
 17 18  1  0     0  0
M  END
>  <IDNUMBER>
BAS 02378565

>  <BOX>
1

>  <CELL>
G11

>  <WEIGHT>
10.0

>  <MOL_WEIGHT>
248.24

>  <STRUCT_FORMULA>
C12H12N2O4

>  <VENDOR_LOT>
266495

$$$$

          08231011372D 1   1.00000     0.00000     0

 18 19  0     0  0            999 V2000
   -2.2655    1.4276    0.0000 C   0  0  3  0  0  0           0  0  0
   -2.2655    3.0897    0.0000 C   0  0  3  0  0  0           0  0  0
   -0.6655    0.8862    0.0000 N   0  0  3  0  0  0           0  0  0
   -3.8379    0.8862    0.0000 N   0  0  0  0  0  0           0  0  0
   -0.6655    3.5931    0.0000 N   0  0  0  0  0  0           0  0  0
   -3.8379    3.5931    0.0000 N   0  0  0  0  0  0           0  0  0
    0.3069    2.2379    0.0000 C   0  0  0  0  0  0           0  0  0
   -0.1552   -0.7000    0.0000 C   0  0  0  0  0  0           0  0  0
   -4.8207    2.2379    0.0000 C   0  0  0  0  0  0           0  0  0
    1.9828    2.2379    0.0000 O   0  0  0  0  0  0           0  0  0
    1.4966   -1.0483    0.0000 C   0  0  0  0  0  0           0  0  0
   -6.4966    2.2379    0.0000 O   0  0  0  0  0  0           0  0  0
    2.0103   -2.6276    0.0000 N   0  0  0  0  0  0           0  0  0
    2.6069    0.1897    0.0000 O   0  0  0  0  0  0           0  0  0
    3.6621   -2.9793    0.0000 C   0  0  0  0  0  0           0  0  0
    4.1517   -4.5621    0.0000 C   0  0  0  0  0  0           0  0  0
    5.7793   -4.9241    0.0000 O   0  0  0  0  0  0           0  0  0
    3.0172   -5.7759    0.0000 O   0  0  0  0  0  0           0  0  0
  1  2  1  0     0  0
  1  3  1  0     0  0
  1  4  1  0     0  0
  2  5  1  0     0  0
  2  6  1  0     0  0
  3  7  1  0     0  0
  3  8  1  0     0  0
  4  9  1  0     0  0
  7 10  2  0     0  0
  8 11  1  0     0  0
  9 12  2  0     0  0
 11 13  1  0     0  0
 11 14  2  0     0  0
 13 15  1  0     0  0
 15 16  1  0     0  0
 16 17  1  0     0  0
 16 18  2  0     0  0
  5  7  1  0     0  0
  6  9  1  0     0  0
M  END
>  <IDNUMBER>
BAS 03376594

>  <BOX>
1

>  <CELL>
G12

>  <WEIGHT>
10.0

>  <MOL_WEIGHT>
257.20

>  <STRUCT_FORMULA>
C8H11N5O5

>  <VENDOR_LOT>
324487

$$$$

          08231011372D 1   1.00000     0.00000     0

 20 21  0     0  0            999 V2000
   -0.3379    0.1690    0.0000 C   0  0  0  0  0  0           0  0  0
    0.2034    0.1690    0.0000 C   0  0  0  0  0  0           0  0  0
   -0.7379   -0.2310    0.0000 C   0  0  0  0  0  0           0  0  0
   -0.5966    0.6448    0.0000 N   0  0  0  0  0  0           0  0  0
    0.5034   -0.3138    0.0000 C   0  0  0  0  0  0           0  0  0
    0.4793    0.6448    0.0000 C   0  0  0  0  0  0           0  0  0
   -1.2207    0.0241    0.0000 N   0  0  3  0  0  0           0  0  0
   -1.1379    0.5690    0.0000 C   0  0  0  0  0  0           0  0  0
    1.0414   -0.3138    0.0000 C   0  0  0  0  0  0           0  0  0
    1.0414    0.6448    0.0000 C   0  0  0  0  0  0           0  0  0
   -1.7207   -0.2310    0.0000 C   0  0  0  0  0  0           0  0  0
    1.3241    0.1690    0.0000 C   0  0  0  0  0  0           0  0  0
   -1.7586   -0.7931    0.0000 C   0  0  0  0  0  0           0  0  0
    1.8793    0.1690    0.0000 N   0  0  0  0  0  0           0  0  0
   -2.2379   -1.0552    0.0000 N   0  0  0  0  0  0           0  0  0
   -1.2759   -1.0931    0.0000 O   0  0  0  0  0  0           0  0  0
    2.1621    0.6448    0.0000 C   0  0  0  0  0  0           0  0  0
   -2.2586   -1.6138    0.0000 N   0  0  0  0  0  0           0  0  0
    2.7241    0.6448    0.0000 C   0  0  0  0  0  0           0  0  0
    1.9034    1.1345    0.0000 O   0  0  0  0  0  0           0  0  0
  1  2  1  0     0  0
  1  3  2  0     0  0
  1  4  1  0     0  0
  2  5  2  0     0  0
  2  6  1  0     0  0
  3  7  1  0     0  0
  4  8  2  0     0  0
  5  9  1  0     0  0
  6 10  2  0     0  0
  7 11  1  0     0  0
  9 12  2  0     0  0
 11 13  1  0     0  0
 12 14  1  0     0  0
 13 15  1  0     0  0
 13 16  2  0     0  0
 14 17  1  0     0  0
 15 18  1  0     0  0
 17 19  1  0     0  0
 17 20  2  0     0  0
  7  8  1  0     0  0
 10 12  1  0     0  0
M  END
>  <IDNUMBER>
BAS 00391305

>  <BOX>
1

>  <CELL>
H1

>  <WEIGHT>
10.0

>  <MOL_WEIGHT>
273.29

>  <STRUCT_FORMULA>
C13H15N5O2

>  <VENDOR_LOT>
190206

$$$$

          08231011372D 1   1.00000     0.00000     0

 21 22  0     0  0            999 V2000
   -0.7414    0.1862    0.0000 C   0  0  0  0  0  0           0  0  0
   -0.0241    0.4276    0.0000 N   0  0  3  0  0  0           0  0  0
   -0.7414   -0.5655    0.0000 C   0  0  0  0  0  0           0  0  0
   -1.3862    0.5483    0.0000 C   0  0  0  0  0  0           0  0  0
    0.3966   -0.1724    0.0000 C   0  0  0  0  0  0           0  0  0
    0.2103    1.1103    0.0000 C   0  0  0  0  0  0           0  0  0
   -0.0241   -0.8000    0.0000 N   0  0  0  0  0  0           0  0  0
   -1.3862   -0.9207    0.0000 N   0  0  3  0  0  0           0  0  0
   -2.0241    0.1862    0.0000 N   0  0  0  0  0  0           0  0  0
   -1.3862    1.3000    0.0000 O   0  0  0  0  0  0           0  0  0
    1.1276   -0.3345    0.0000 N   0  0  0  0  0  0           0  0  0
    0.9483    0.9276    0.0000 C   0  0  0  0  0  0           0  0  0
   -2.0241   -0.5655    0.0000 C   0  0  0  0  0  0           0  0  0
   -1.3862   -1.6724    0.0000 C   0  0  0  0  0  0           0  0  0
    1.3483   -1.0862    0.0000 C   0  0  0  0  0  0           0  0  0
    1.4966    1.4138    0.0000 C   0  0  3  0  0  0           0  0  0
   -2.6862   -0.9517    0.0000 O   0  0  0  0  0  0           0  0  0
    2.0379   -1.3897    0.0000 C   0  0  0  0  0  0           0  0  0
    2.2379    1.2103    0.0000 C   0  0  0  0  0  0           0  0  0
    1.3103    2.1276    0.0000 C   0  0  0  0  0  0           0  0  0
    2.6966   -0.9862    0.0000 N   0  0  0  0  0  0           0  0  0
  1  2  1  0     0  0
  1  3  2  0     0  0
  1  4  1  0     0  0
  2  5  1  0     0  0
  2  6  1  0     0  0
  3  7  1  0     0  0
  3  8  1  0     0  0
  4  9  1  0     0  0
  4 10  2  0     0  0
  5 11  1  0     0  0
  6 12  1  0     0  0
  8 13  1  0     0  0
  8 14  1  0     0  0
 11 15  1  0     0  0
 12 16  1  0     0  0
 13 17  2  0     0  0
 15 18  1  0     0  0
 16 19  1  0     0  0
 16 20  1  0     0  0
 18 21  1  0     0  0
  5  7  2  0     0  0
  9 13  1  0     0  0
M  END
>  <IDNUMBER>
BAS 00316181

>  <BOX>
1

>  <CELL>
H2

>  <WEIGHT>
10.0

>  <MOL_WEIGHT>
294.36

>  <STRUCT_FORMULA>
C13H22N6O2

>  <VENDOR_LOT>
28006

$$$$

          08231011372D 1   1.00000     0.00000     0

 20 21  0     0  0            999 V2000
   -1.2655    0.5207    0.0000 C   0  0  0  0  0  0           0  0  0
   -1.2655   -0.8310    0.0000 C   0  0  0  0  0  0           0  0  0
    0.0241    0.9448    0.0000 N   0  0  3  0  0  0           0  0  0
   -2.4345    1.2000    0.0000 C   0  0  0  0  0  0           0  0  0
    0.0241   -1.2517    0.0000 N   0  0  0  0  0  0           0  0  0
   -2.4345   -1.5069    0.0000 N   0  0  3  0  0  0           0  0  0
    0.8138   -0.1517    0.0000 C   0  0  0  0  0  0           0  0  0
    0.4517    2.2448    0.0000 C   0  0  0  0  0  0           0  0  0
   -3.6138    0.5207    0.0000 N   0  0  0  0  0  0           0  0  0
   -2.4345    2.5621    0.0000 O   0  0  0  0  0  0           0  0  0
   -3.6138   -0.8310    0.0000 C   0  0  0  0  0  0           0  0  0
   -2.4345   -2.8690    0.0000 C   0  0  0  0  0  0           0  0  0
    2.1724   -0.1379    0.0000 S   0  0  0  0  0  0           0  0  0
    1.7862    2.5103    0.0000 C   0  0  0  0  0  0           0  0  0
   -4.8241   -1.5069    0.0000 O   0  0  0  0  0  0           0  0  0
    2.8517   -1.3069    0.0000 C   0  0  0  0  0  0           0  0  0
    2.2138    3.7931    0.0000 C   0  0  0  0  0  0           0  0  0
    4.2138   -1.3000    0.0000 C   0  0  0  0  0  0           0  0  0
    4.8897   -2.4793    0.0000 O   0  0  0  0  0  0           0  0  0
    4.8897   -0.1310    0.0000 O   0  0  0  0  0  0           0  0  0
  1  2  2  0     0  0
  1  3  1  0     0  0
  1  4  1  0     0  0
  2  5  1  0     0  0
  2  6  1  0     0  0
  3  7  1  0     0  0
  3  8  1  0     0  0
  4  9  1  0     0  0
  4 10  2  0     0  0
  6 11  1  0     0  0
  6 12  1  0     0  0
  7 13  1  0     0  0
  8 14  1  0     0  0
 11 15  2  0     0  0
 13 16  1  0     0  0
 14 17  1  0     0  0
 16 18  1  0     0  0
 18 19  1  0     0  0
 18 20  2  0     0  0
  5  7  2  0     0  0
  9 11  1  0     0  0
M  END
>  <IDNUMBER>
BAS 00162659

>  <BOX>
1

>  <CELL>
H3

>  <WEIGHT>
10.0

>  <MOL_WEIGHT>
298.32

>  <STRUCT_FORMULA>
C11H14N4O4S

>  <VENDOR_LOT>
151931

$$$$

          08231011372D 1   1.00000     0.00000     0

 19 21  0     0  0            999 V2000
    0.4655   -1.2448    0.0000 C   0  0  0  0  0  0           0  0  0
   -0.3586   -1.2345    0.0000 C   0  0  0  0  0  0           0  0  0
    0.9621   -0.5931    0.0000 C   0  0  0  0  0  0           0  0  0
    0.7103   -2.0345    0.0000 N   0  0  0  0  0  0           0  0  0
   -0.5207   -0.4069    0.0000 C   0  0  0  0  0  0           0  0  0
   -0.6207   -2.0069    0.0000 C   0  0  0  0  0  0           0  0  0
    1.7793   -0.6931    0.0000 C   0  0  0  0  0  0           0  0  0
    0.6379    0.1655    0.0000 C   0  0  0  0  0  0           0  0  0
    0.0379   -2.5034    0.0000 N   0  0  0  0  0  0           0  0  0
   -1.3828    0.0448    0.0000 N   0  0  0  0  0  0           0  0  0
    2.2793   -0.0345    0.0000 C   0  0  0  0  0  0           0  0  0
    1.1276    0.8276    0.0000 C   0  0  0  0  0  0           0  0  0
   -1.1345    0.8345    0.0000 N   0  0  3  0  0  0           0  0  0
    1.9552    0.7276    0.0000 C   0  0  0  0  0  0           0  0  0
   -1.6241    1.4931    0.0000 C   0  0  0  0  0  0           0  0  0
   -0.3517    1.0931    0.0000 N   0  0  0  0  0  0           0  0  0
   -1.1448    2.1655    0.0000 N   0  0  0  0  0  0           0  0  0
   -2.4517    1.4828    0.0000 N   0  0  0  0  0  0           0  0  0
   -0.3586    1.9172    0.0000 N   0  0  0  0  0  0           0  0  0
  1  2  1  0     0  0
  1  3  1  0     0  0
  1  4  2  0     0  0
  2  5  1  0     0  0
  2  6  2  0     0  0
  3  7  2  0     0  0
  3  8  1  0     0  0
  4  9  1  0     0  0
  5 10  2  0     0  0
  7 11  1  0     0  0
  8 12  2  0     0  0
 10 13  1  0     0  0
 11 14  2  0     0  0
 13 15  1  0     0  0
 13 16  1  0     0  0
 15 17  2  0     0  0
 15 18  1  0     0  0
 16 19  2  0     0  0
  6  9  1  0     0  0
 12 14  1  0     0  0
 17 19  1  0     0  0
M  END
>  <IDNUMBER>
BAS 00554245

>  <BOX>
1

>  <CELL>
H4

>  <WEIGHT>
10.0

>  <MOL_WEIGHT>
254.26

>  <STRUCT_FORMULA>
C11H10N8

>  <VENDOR_LOT>
91943

$$$$

          08231011372D 1   1.00000     0.00000     0

 22 24  0     0  0            999 V2000
   -0.2241   -0.4966    0.0000 C   0  0  3  0  0  0           0  0  0
   -1.0931   -0.4966    0.0000 C   0  0  0  0  0  0           0  0  0
    0.2069    0.2621    0.0000 C   0  0  0  0  0  0           0  0  0
    0.2069   -1.2483    0.0000 C   0  0  0  0  0  0           0  0  0
   -1.5310   -1.2483    0.0000 C   0  0  0  0  0  0           0  0  0
   -1.6828    0.1414    0.0000 C   0  0  0  0  0  0           0  0  0
    1.0759    0.2621    0.0000 C   0  0  0  0  0  0           0  0  0
   -0.2241    1.0138    0.0000 C   0  0  0  0  0  0           0  0  0
   -0.2241   -1.9966    0.0000 C   0  0  0  0  0  0           0  0  0
    1.0759   -1.2379    0.0000 C   0  0  0  0  0  0           0  0  0
   -1.0931   -1.9966    0.0000 O   0  0  0  0  0  0           0  0  0
   -2.3828   -1.0690    0.0000 N   0  0  0  0  0  0           0  0  0
   -2.4828   -0.2069    0.0000 N   0  0  0  0  0  0           0  0  0
   -1.5138    0.9931    0.0000 C   0  0  0  0  0  0           0  0  0
    1.5069    1.0138    0.0000 C   0  0  0  0  0  0           0  0  0
    0.2172    1.7621    0.0000 C   0  0  0  0  0  0           0  0  0
    0.2069   -2.7690    0.0000 N   0  0  0  0  0  0           0  0  0
    1.9379   -1.2276    0.0000 N   0  0  0  0  0  0           0  0  0
    1.0759    1.7621    0.0000 C   0  0  0  0  0  0           0  0  0
    2.3759    1.0138    0.0000 O   0  0  0  0  0  0           0  0  0
    1.4966    2.5138    0.0000 O   0  0  0  0  0  0           0  0  0
    1.0586    3.2621    0.0000 C   0  0  0  0  0  0           0  0  0
  1  2  1  0     0  0
  1  3  1  0     0  0
  1  4  1  0     0  0
  2  5  2  0     0  0
  2  6  1  0     0  0
  3  7  1  0     0  0
  3  8  2  0     0  0
  4  9  2  0     0  0
  4 10  1  0     0  0
  5 11  1  0     0  0
  5 12  1  0     0  0
  6 13  2  0     0  0
  6 14  1  0     0  0
  7 15  2  0     0  0
  8 16  1  0     0  0
  9 17  1  0     0  0
 10 18  3  0     0  0
 15 19  1  0     0  0
 15 20  1  0     0  0
 19 21  1  0     0  0
 21 22  1  0     0  0
  9 11  1  0     0  0
 12 13  1  0     0  0
 16 19  2  0     0  0
M  END
>  <IDNUMBER>
BAS 02072947

>  <BOX>
1

>  <CELL>
H5

>  <WEIGHT>
10.0

>  <MOL_WEIGHT>
298.30

>  <STRUCT_FORMULA>
C15H14N4O3

>  <VENDOR_LOT>
230093

$$$$

          08231011372D 1   1.00000     0.00000     0

 17 18  0     0  0            999 V2000
   -0.0966   -0.0862    0.0000 C   0  0  0  0  0  0           0  0  0
    0.8207    0.5897    0.0000 C   0  0  0  0  0  0           0  0  0
    0.0207   -1.2483    0.0000 C   0  0  0  0  0  0           0  0  0
   -1.1414    0.3897    0.0000 C   0  0  0  0  0  0           0  0  0
    1.8828    0.1138    0.0000 N   0  0  0  0  0  0           0  0  0
    0.7034    1.7138    0.0000 N   0  0  0  0  0  0           0  0  0
   -0.9414   -1.9103    0.0000 C   0  0  0  0  0  0           0  0  0
   -2.0793   -0.2690    0.0000 C   0  0  0  0  0  0           0  0  0
    2.8034    0.7897    0.0000 C   0  0  0  0  0  0           0  0  0
    1.6586    2.4138    0.0000 C   0  0  0  0  0  0           0  0  0
   -1.9793   -1.4103    0.0000 C   0  0  0  0  0  0           0  0  0
    2.7034    1.9310    0.0000 N   0  0  0  0  0  0           0  0  0
    3.8586    0.2897    0.0000 N   0  0  0  0  0  0           0  0  0
    1.5586    3.5690    0.0000 N   0  0  0  0  0  0           0  0  0
   -2.9414   -2.0690    0.0000 N   0  3  0  0  0  0           0  0  0
   -2.8586   -3.2310    0.0000 O   0  0  0  0  0  0           0  0  0
   -3.9793   -1.5690    0.0000 O   0  5  0  0  0  0           0  0  0
  1  2  1  0     0  0
  1  3  1  0     0  0
  1  4  2  0     0  0
  2  5  2  0     0  0
  2  6  1  0     0  0
  3  7  2  0     0  0
  4  8  1  0     0  0
  5  9  1  0     0  0
  6 10  2  0     0  0
  7 11  1  0     0  0
  9 12  2  0     0  0
  9 13  1  0     0  0
 10 14  1  0     0  0
 11 15  1  0     0  0
 15 16  2  0     0  0
 15 17  1  0     0  0
  8 11  2  0     0  0
 10 12  1  0     0  0
M  CHG  2  15   1  17  -1
M  END
>  <IDNUMBER>
BAS 00268876

>  <BOX>
1

>  <CELL>
H6

>  <WEIGHT>
10.0

>  <MOL_WEIGHT>
232.20

>  <STRUCT_FORMULA>
C9H8N6O2

>  <VENDOR_LOT>
147025

$$$$

          08231011372D 1   1.00000     0.00000     0

 20 21  0     0  0            999 V2000
    0.6207    0.2379    0.0000 C   0  0  3  0  0  0           0  0  0
    0.8414    1.0310    0.0000 C   0  0  0  0  0  0           0  0  0
   -0.0897   -0.1621    0.0000 C   0  0  0  0  0  0           0  0  0
    1.3172   -0.2138    0.0000 N   0  0  3  0  0  0           0  0  0
    1.6690    1.0759    0.0000 C   0  0  0  0  0  0           0  0  0
    0.1207    1.4517    0.0000 C   0  0  0  0  0  0           0  0  0
   -0.0931   -0.9862    0.0000 C   0  0  0  0  0  0           0  0  0
   -0.8034    0.2517    0.0000 C   0  0  0  0  0  0           0  0  0
    1.9586    0.3000    0.0000 C   0  0  0  0  0  0           0  0  0
    1.3552   -1.0379    0.0000 C   0  0  0  0  0  0           0  0  0
    2.1172    1.7621    0.0000 O   0  0  0  0  0  0           0  0  0
    0.1207    2.2655    0.0000 C   0  0  0  0  0  0           0  0  0
   -0.5897    1.0310    0.0000 O   0  0  0  0  0  0           0  0  0
   -0.8069   -1.4000    0.0000 C   0  0  0  0  0  0           0  0  0
   -1.5172   -0.1483    0.0000 C   0  0  0  0  0  0           0  0  0
    2.7552    0.0862    0.0000 O   0  0  0  0  0  0           0  0  0
   -1.5276   -0.9759    0.0000 C   0  0  0  0  0  0           0  0  0
   -2.2448   -1.3862    0.0000 N   0  3  0  0  0  0           0  0  0
   -2.2517   -2.2138    0.0000 O   0  0  0  0  0  0           0  0  0
   -2.9517   -0.9690    0.0000 O   0  5  0  0  0  0           0  0  0
  1  2  1  0     0  0
  1  3  1  0     0  0
  1  4  1  0     0  0
  2  5  2  0     0  0
  2  6  1  0     0  0
  3  7  1  0     0  0
  3  8  2  0     0  0
  4  9  1  0     0  0
  4 10  1  0     0  0
  5 11  1  0     0  0
  6 12  1  0     0  0
  6 13  2  0     0  0
  7 14  2  0     0  0
  8 15  1  0     0  0
  9 16  2  0     0  0
 14 17  1  0     0  0
 17 18  1  0     0  0
 18 19  2  0     0  0
 18 20  1  0     0  0
  5  9  1  0     0  0
 15 17  2  0     0  0
M  CHG  2  18   1  20  -1
M  END
>  <IDNUMBER>
BAS 00732798

>  <BOX>
1

>  <CELL>
H7

>  <WEIGHT>
10.0

>  <MOL_WEIGHT>
276.25

>  <STRUCT_FORMULA>
C13H12N2O5

>  <VENDOR_LOT>
146033

$$$$

          08231011372D 1   1.00000     0.00000     0

 17 18  0     0  0            999 V2000
   -1.2586   -0.2345    0.0000 C   0  0  0  0  0  0           0  0  0
   -1.9759   -0.6483    0.0000 C   0  0  0  0  0  0           0  0  0
   -1.2586    0.6000    0.0000 C   0  0  0  0  0  0           0  0  0
   -0.5483   -0.6517    0.0000 C   0  0  0  0  0  0           0  0  0
   -2.6966   -0.2276    0.0000 C   0  0  0  0  0  0           0  0  0
   -1.9759   -1.4724    0.0000 O   0  0  0  0  0  0           0  0  0
   -1.9724    1.0103    0.0000 C   0  0  0  0  0  0           0  0  0
   -0.5379    1.0207    0.0000 O   0  0  0  0  0  0           0  0  0
    0.1724   -0.2483    0.0000 N   0  0  0  0  0  0           0  0  0
   -2.6897    0.6000    0.0000 C   0  0  0  0  0  0           0  0  0
    0.8862   -0.6621    0.0000 C   0  0  0  0  0  0           0  0  0
    1.6034   -0.2517    0.0000 C   0  0  0  0  0  0           0  0  0
    2.3103   -0.6724    0.0000 C   0  0  0  0  0  0           0  0  0
    1.5966    0.5621    0.0000 C   0  0  0  0  0  0           0  0  0
    3.0241   -0.2621    0.0000 C   0  0  0  0  0  0           0  0  0
    2.3034    0.9724    0.0000 N   0  0  0  0  0  0           0  0  0
    3.0241    0.5621    0.0000 C   0  0  0  0  0  0           0  0  0
  1  2  1  0     0  0
  1  3  1  0     0  0
  1  4  2  0     0  0
  2  5  1  0     0  0
  2  6  2  0     0  0
  3  7  1  0     0  0
  3  8  2  0     0  0
  4  9  1  0     0  0
  5 10  1  0     0  0
  9 11  1  0     0  0
 11 12  1  0     0  0
 12 13  2  0     0  0
 12 14  1  0     0  0
 13 15  1  0     0  0
 14 16  2  0     0  0
 15 17  2  0     0  0
  7 10  1  0     0  0
 16 17  1  0     0  0
M  END
>  <IDNUMBER>
BAS 01215266

>  <BOX>
1

>  <CELL>
H8

>  <WEIGHT>
10.0

>  <MOL_WEIGHT>
230.27

>  <STRUCT_FORMULA>
C13H14N2O2

>  <VENDOR_LOT>
256576

$$$$

          08231011372D 1   1.00000     0.00000     0

 20 22  0     0  0            999 V2000
    0.1000   -0.1414    0.0000 C   0  0  3  0  0  0           0  0  0
   -0.6138   -0.5586    0.0000 C   0  0  0  0  0  0           0  0  0
    0.1069    0.6828    0.0000 C   0  0  0  0  0  0           0  0  0
    0.8207   -0.5586    0.0000 C   0  0  0  0  0  0           0  0  0
   -0.6034   -1.3828    0.0000 C   0  0  0  0  0  0           0  0  0
   -2.0241   -0.5690    0.0000 C   0  0  0  0  0  0           0  0  0
    0.8207    1.0931    0.0000 C   0  0  0  0  0  0           0  0  0
   -0.6034    1.1034    0.0000 C   0  0  0  0  0  0           0  0  0
    0.8207   -1.3828    0.0000 C   0  0  0  0  0  0           0  0  0
    1.5241   -0.1448    0.0000 C   0  0  0  0  0  0           0  0  0
    0.1000   -1.7897    0.0000 O   0  0  0  0  0  0           0  0  0
   -1.3138   -1.7966    0.0000 N   0  0  0  0  0  0           0  0  0
   -2.0241   -1.3828    0.0000 N   0  0  0  0  0  0           0  0  0
   -2.7414   -0.1586    0.0000 C   0  0  0  0  0  0           0  0  0
    0.8207    1.9207    0.0000 C   0  0  0  0  0  0           0  0  0
   -0.6000    1.9207    0.0000 C   0  0  0  0  0  0           0  0  0
    1.5241   -1.7966    0.0000 N   0  0  0  0  0  0           0  0  0
    2.2379    0.2655    0.0000 N   0  0  0  0  0  0           0  0  0
    0.1138    2.3310    0.0000 C   0  0  0  0  0  0           0  0  0
    1.5345    2.3414    0.0000 Cl  0  0  0  0  0  0           0  0  0
  1  2  1  0     0  0
  1  3  1  0     0  0
  1  4  1  0     0  0
  2  5  2  0     0  0
  2  6  1  0     0  0
  3  7  2  0     0  0
  3  8  1  0     0  0
  4  9  2  0     0  0
  4 10  1  0     0  0
  5 11  1  0     0  0
  5 12  1  0     0  0
  6 13  2  0     0  0
  6 14  1  0     0  0
  7 15  1  0     0  0
  8 16  2  0     0  0
  9 17  1  0     0  0
 10 18  3  0     0  0
 15 19  2  0     0  0
 15 20  1  0     0  0
  9 11  1  0     0  0
 12 13  1  0     0  0
 16 19  1  0     0  0
M  END
>  <IDNUMBER>
BAS 01101682

>  <BOX>
1

>  <CELL>
H9

>  <WEIGHT>
10.0

>  <MOL_WEIGHT>
286.72

>  <STRUCT_FORMULA>
C14H11ClN4O

>  <VENDOR_LOT>
230189

$$$$

          08231011372D 1   1.00000     0.00000     0

 22 24  0     0  0            999 V2000
   -1.5345    0.4448    0.0000 C   0  0  0  0  0  0           0  0  0
   -0.7724    0.8862    0.0000 C   0  0  0  0  0  0           0  0  0
   -2.2966    0.8862    0.0000 C   0  0  0  0  0  0           0  0  0
   -1.5345   -0.4310    0.0000 C   0  0  0  0  0  0           0  0  0
    0.0034    0.4241    0.0000 C   0  0  0  0  0  0           0  0  0
   -0.7724    1.7690    0.0000 C   0  0  0  0  0  0           0  0  0
   -2.2966    1.7690    0.0000 C   0  0  0  0  0  0           0  0  0
   -3.0517    0.4448    0.0000 C   0  0  0  0  0  0           0  0  0
   -2.2966   -0.8759    0.0000 C   0  0  0  0  0  0           0  0  0
    0.0034   -0.4552    0.0000 N   0  0  0  0  0  0           0  0  0
   -1.5345    2.2069    0.0000 C   0  0  0  0  0  0           0  0  0
    0.0034    2.2241    0.0000 O   0  0  0  0  0  0           0  0  0
   -3.0517   -0.4310    0.0000 C   0  0  0  0  0  0           0  0  0
    0.7655   -0.8931    0.0000 C   0  0  0  0  0  0           0  0  0
    1.5276   -0.4552    0.0000 C   0  0  0  0  0  0           0  0  0
    0.7655   -1.7759    0.0000 C   0  0  0  0  0  0           0  0  0
    2.2862   -0.8931    0.0000 C   0  0  0  0  0  0           0  0  0
    1.5276   -2.2138    0.0000 C   0  0  0  0  0  0           0  0  0
    2.2862   -1.7759    0.0000 C   0  0  0  0  0  0           0  0  0
    3.0655   -0.4310    0.0000 C   0  0  0  0  0  0           0  0  0
    3.8276   -0.8759    0.0000 C   0  0  0  0  0  0           0  0  0
    3.0655    0.4448    0.0000 O   0  0  0  0  0  0           0  0  0
  1  2  2  0     0  0
  1  3  1  0     0  0
  1  4  1  0     0  0
  2  5  1  0     0  0
  2  6  1  0     0  0
  3  7  2  0     0  0
  3  8  1  0     0  0
  4  9  2  0     0  0
  5 10  2  0     0  0
  6 11  2  0     0  0
  6 12  1  0     0  0
  8 13  2  0     0  0
 10 14  1  0     0  0
 14 15  1  0     0  0
 14 16  2  0     0  0
 15 17  2  0     0  0
 16 18  1  0     0  0
 17 19  1  0     0  0
 17 20  1  0     0  0
 20 21  1  0     0  0
 20 22  2  0     0  0
  7 11  1  0     0  0
  9 13  1  0     0  0
 18 19  2  0     0  0
M  END
>  <IDNUMBER>
BAS 00112454

>  <BOX>
1

>  <CELL>
H10

>  <WEIGHT>
10.0

>  <MOL_WEIGHT>
289.33

>  <STRUCT_FORMULA>
C19H15NO2

>  <VENDOR_LOT>
191388

$$$$

          08231011372D 1   1.00000     0.00000     0

 15 16  0     0  0            999 V2000
    0.5034   -0.6517    0.0000 C   0  0  0  0  0  0           0  0  0
    0.5034   -1.4517    0.0000 C   0  0  0  0  0  0           0  0  0
   -0.1759   -0.2310    0.0000 C   0  0  0  0  0  0           0  0  0
    1.2655   -0.3931    0.0000 N   0  0  0  0  0  0           0  0  0
    1.2655   -1.6931    0.0000 N   0  0  0  0  0  0           0  0  0
   -0.1759   -1.8517    0.0000 N   0  0  0  0  0  0           0  0  0
   -0.8759   -0.6517    0.0000 N   0  0  0  0  0  0           0  0  0
   -0.1759    0.5690    0.0000 S   0  0  0  0  0  0           0  0  0
    1.7241   -1.0517    0.0000 C   0  0  0  0  0  0           0  0  0
   -0.8759   -1.4517    0.0000 C   0  0  0  0  0  0           0  0  0
   -0.8759    0.9690    0.0000 C   0  0  0  0  0  0           0  0  0
   -0.8759    1.7690    0.0000 C   0  0  0  0  0  0           0  0  0
   -0.1759    2.1690    0.0000 N   0  0  0  0  0  0           0  0  0
   -1.5621    2.1690    0.0000 O   0  0  0  0  0  0           0  0  0
    0.5241    1.7690    0.0000 N   0  0  0  0  0  0           0  0  0
  1  2  2  0     0  0
  1  3  1  0     0  0
  1  4  1  0     0  0
  2  5  1  0     0  0
  2  6  1  0     0  0
  3  7  2  0     0  0
  3  8  1  0     0  0
  4  9  2  0     0  0
  6 10  2  0     0  0
  8 11  1  0     0  0
 11 12  1  0     0  0
 12 13  1  0     0  0
 12 14  2  0     0  0
 13 15  1  0     0  0
  5  9  1  0     0  0
  7 10  1  0     0  0
M  END
>  <IDNUMBER>
BAS 00231905

>  <BOX>
1

>  <CELL>
H11

>  <WEIGHT>
10.0

>  <MOL_WEIGHT>
224.25

>  <STRUCT_FORMULA>
C7H8N6OS

>  <VENDOR_LOT>
145270

$$$$

          08231011372D 1   1.00000     0.00000     0

 13 14  0     0  0            999 V2000
    0.0586   -0.4034    0.0000 C   0  0  0  0  0  0           0  0  0
   -0.5276    0.8793    0.0000 C   0  0  0  0  0  0           0  0  0
   -0.7621   -1.5828    0.0000 C   0  0  0  0  0  0           0  0  0
    1.4586   -0.5552    0.0000 C   0  0  0  0  0  0           0  0  0
    0.1586    2.1034    0.0000 C   0  0  0  0  0  0           0  0  0
   -1.9414    1.1552    0.0000 N   0  0  0  0  0  0           0  0  0
   -0.1621   -2.8655    0.0000 C   0  0  0  0  0  0           0  0  0
    2.0517   -1.8207    0.0000 C   0  0  0  0  0  0           0  0  0
   -0.8103    3.1655    0.0000 C   0  0  0  0  0  0           0  0  0
   -2.1103    2.5448    0.0000 N   0  0  0  0  0  0           0  0  0
    1.2517   -2.9552    0.0000 C   0  0  0  0  0  0           0  0  0
   -0.5276    4.5828    0.0000 N   0  0  0  0  0  0           0  0  0
    1.8517   -4.2448    0.0000 N   0  0  0  0  0  0           0  0  0
  1  2  1  0     0  0
  1  3  2  0     0  0
  1  4  1  0     0  0
  2  5  1  0     0  0
  2  6  2  0     0  0
  3  7  1  0     0  0
  4  8  2  0     0  0
  5  9  2  0     0  0
  6 10  1  0     0  0
  7 11  2  0     0  0
  9 12  1  0     0  0
 11 13  1  0     0  0
  8 11  1  0     0  0
  9 10  1  0     0  0
M  END
>  <IDNUMBER>
BAS 00367076

>  <BOX>
1

>  <CELL>
H12

>  <WEIGHT>
10.0

>  <MOL_WEIGHT>
174.21

>  <STRUCT_FORMULA>
C9H10N4

>  <VENDOR_LOT>
311469

$$$$

          08231011372D 1   1.00000     0.00000     0

 21 22  0     0  0            999 V2000
   -0.4897    0.6655    0.0000 C   0  0  0  0  0  0           0  0  0
    0.0793   -0.3345    0.0000 C   0  0  0  0  0  0           0  0  0
   -1.6793    0.6655    0.0000 C   0  0  0  0  0  0           0  0  0
    0.0793    1.6655    0.0000 C   0  0  0  0  0  0           0  0  0
    1.2621   -0.3345    0.0000 C   0  0  3  0  0  0           0  0  0
   -0.4793   -1.3448    0.0000 C   0  0  0  0  0  0           0  0  0
   -2.2483   -0.3241    0.0000 C   0  0  0  0  0  0           0  0  0
   -2.2586    1.6759    0.0000 C   0  0  0  0  0  0           0  0  0
   -0.5000    2.6655    0.0000 C   0  0  0  0  0  0           0  0  0
    1.8414   -1.3345    0.0000 C   0  0  0  0  0  0           0  0  0
    1.8310    0.6759    0.0000 N   0  0  0  0  0  0           0  0  0
   -1.6793   -1.3034    0.0000 C   0  0  0  0  0  0           0  0  0
   -3.4379   -0.3448    0.0000 O   0  0  0  0  0  0           0  0  0
   -1.6690    2.6862    0.0000 C   0  0  0  0  0  0           0  0  0
    1.2690   -2.3448    0.0000 C   0  0  0  0  0  0           0  0  0
    3.0000    0.6655    0.0000 C   0  0  0  0  0  0           0  0  0
   -4.0310    0.6448    0.0000 C   0  0  0  0  0  0           0  0  0
    1.8517   -3.3552    0.0000 O   0  0  0  0  0  0           0  0  0
    0.1103   -2.3345    0.0000 O   0  0  0  0  0  0           0  0  0
    3.5690    1.6759    0.0000 C   0  0  0  0  0  0           0  0  0
    3.5793   -0.3448    0.0000 O   0  0  0  0  0  0           0  0  0
  1  2  2  0     0  0
  1  3  1  0     0  0
  1  4  1  0     0  0
  2  5  1  0     0  0
  2  6  1  0     0  0
  3  7  2  0     0  0
  3  8  1  0     0  0
  4  9  2  0     0  0
  5 10  1  0     0  0
  5 11  1  0     0  0
  6 12  2  0     0  0
  7 13  1  0     0  0
  8 14  2  0     0  0
 10 15  1  0     0  0
 11 16  1  0     0  0
 13 17  1  0     0  0
 15 18  1  0     0  0
 15 19  2  0     0  0
 16 20  1  0     0  0
 16 21  2  0     0  0
  7 12  1  0     0  0
  9 14  1  0     0  0
M  END
>  <IDNUMBER>
BAS 01031334

>  <BOX>
2

>  <CELL>
A1

>  <WEIGHT>
10.0

>  <MOL_WEIGHT>
287.31

>  <STRUCT_FORMULA>
C16H17NO4

>  <VENDOR_LOT>
247221

$$$$

          08231011372D 1   1.00000     0.00000     0

 22 23  0     0  0            999 V2000
   -1.4000   -0.6379    0.0000 C   0  0  0  0  0  0           0  0  0
   -2.0552   -0.1759    0.0000 C   0  0  0  0  0  0           0  0  0
   -0.6379   -0.3862    0.0000 C   0  0  0  0  0  0           0  0  0
   -1.6483   -1.4138    0.0000 N   0  0  0  0  0  0           0  0  0
   -2.7034   -0.6379    0.0000 C   0  0  0  0  0  0           0  0  0
   -2.0552    0.6379    0.0000 C   0  0  0  0  0  0           0  0  0
   -0.0276   -0.9241    0.0000 C   0  0  0  0  0  0           0  0  0
   -0.4655    0.4000    0.0000 C   0  0  0  0  0  0           0  0  0
   -2.4552   -1.4138    0.0000 N   0  0  0  0  0  0           0  0  0
   -3.4759   -0.3862    0.0000 N   0  0  0  0  0  0           0  0  0
   -2.0552    1.4414    0.0000 N   0  0  0  0  0  0           0  0  0
    0.7379   -0.6759    0.0000 C   0  0  0  0  0  0           0  0  0
   -0.3000    1.1897    0.0000 N   0  0  0  0  0  0           0  0  0
    0.9000    0.1138    0.0000 C   0  0  0  0  0  0           0  0  0
    1.3379   -1.2138    0.0000 C   0  0  0  0  0  0           0  0  0
    1.6621    0.3655    0.0000 C   0  0  0  0  0  0           0  0  0
    2.1103   -0.9621    0.0000 C   0  0  0  0  0  0           0  0  0
    2.2759   -0.1724    0.0000 C   0  0  0  0  0  0           0  0  0
    1.8379    1.1621    0.0000 O   0  0  0  0  0  0           0  0  0
    3.0379    0.0793    0.0000 O   0  0  0  0  0  0           0  0  0
    2.6000    1.4138    0.0000 C   0  0  0  0  0  0           0  0  0
    2.7724    2.2000    0.0000 C   0  0  0  0  0  0           0  0  0
  1  2  1  0     0  0
  1  3  1  0     0  0
  1  4  2  0     0  0
  2  5  2  0     0  0
  2  6  1  0     0  0
  3  7  2  0     0  0
  3  8  1  0     0  0
  4  9  1  0     0  0
  5 10  1  0     0  0
  6 11  3  0     0  0
  7 12  1  0     0  0
  8 13  3  0     0  0
 12 14  2  0     0  0
 12 15  1  0     0  0
 14 16  1  0     0  0
 15 17  2  0     0  0
 16 18  2  0     0  0
 16 19  1  0     0  0
 18 20  1  0     0  0
 19 21  1  0     0  0
 21 22  1  0     0  0
  5  9  1  0     0  0
 17 18  1  0     0  0
M  END
>  <IDNUMBER>
BAS 00858148

>  <BOX>
2

>  <CELL>
A2

>  <WEIGHT>
10.0

>  <MOL_WEIGHT>
295.30

>  <STRUCT_FORMULA>
C15H13N5O2

>  <VENDOR_LOT>
70586

$$$$

          08231011372D 1   1.00000     0.00000     0

 20 22  0     0  0            999 V2000
   -0.1379   -0.0793    0.0000 N   0  0  3  0  0  0           0  0  0
    0.7172   -0.1276    0.0000 C   0  0  0  0  0  0           0  0  0
   -0.6345    0.6103    0.0000 N   0  0  0  0  0  0           0  0  0
   -0.6345   -0.7724    0.0000 N   0  0  0  0  0  0           0  0  0
    1.1931    0.5759    0.0000 C   0  0  0  0  0  0           0  0  0
    1.1138   -0.8897    0.0000 C   0  0  0  0  0  0           0  0  0
   -1.4379    0.3483    0.0000 C   0  0  0  0  0  0           0  0  0
   -1.4379   -0.5103    0.0000 C   0  0  0  0  0  0           0  0  0
    2.0517    0.5276    0.0000 C   0  0  0  0  0  0           0  0  0
    1.9621   -0.9414    0.0000 C   0  0  0  0  0  0           0  0  0
    0.6414   -1.6241    0.0000 O   0  0  0  0  0  0           0  0  0
   -2.1828    0.7759    0.0000 C   0  0  0  0  0  0           0  0  0
   -2.1828   -0.9414    0.0000 C   0  0  0  0  0  0           0  0  0
    2.4310   -0.2241    0.0000 C   0  0  0  0  0  0           0  0  0
    2.5414    1.2379    0.0000 N   0  3  0  0  0  0           0  0  0
   -2.9345    0.3586    0.0000 C   0  0  0  0  0  0           0  0  0
   -2.9345   -0.5241    0.0000 C   0  0  0  0  0  0           0  0  0
    2.1655    2.0103    0.0000 O   0  0  0  0  0  0           0  0  0
    3.3931    1.1724    0.0000 O   0  5  0  0  0  0           0  0  0
   -3.6966   -0.9793    0.0000 N   0  0  0  0  0  0           0  0  0
  1  2  1  0     0  0
  1  3  1  0     0  0
  1  4  1  0     0  0
  2  5  1  0     0  0
  2  6  2  0     0  0
  3  7  2  0     0  0
  4  8  2  0     0  0
  5  9  2  0     0  0
  6 10  1  0     0  0
  6 11  1  0     0  0
  7 12  1  0     0  0
  8 13  1  0     0  0
  9 14  1  0     0  0
  9 15  1  0     0  0
 12 16  2  0     0  0
 13 17  2  0     0  0
 15 18  2  0     0  0
 15 19  1  0     0  0
 17 20  1  0     0  0
  7  8  1  0     0  0
 10 14  2  0     0  0
 16 17  1  0     0  0
M  CHG  2  15   1  19  -1
M  END
>  <IDNUMBER>
BAS 00398507

>  <BOX>
2

>  <CELL>
A3

>  <WEIGHT>
10.0

>  <MOL_WEIGHT>
271.24

>  <STRUCT_FORMULA>
C12H9N5O3

>  <VENDOR_LOT>
26222

$$$$

          08231011372D 1   1.00000     0.00000     0

 20 21  0     0  0            999 V2000
   -0.6621    0.2759    0.0000 C   0  0  0  0  0  0           0  0  0
   -0.6621   -0.4241    0.0000 C   0  0  0  0  0  0           0  0  0
    0.0207    0.4759    0.0000 N   0  0  3  0  0  0           0  0  0
   -1.2621    0.6138    0.0000 C   0  0  0  0  0  0           0  0  0
    0.0207   -0.6448    0.0000 N   0  0  0  0  0  0           0  0  0
   -1.2621   -0.7862    0.0000 N   0  0  3  0  0  0           0  0  0
    0.4000   -0.0621    0.0000 C   0  0  0  0  0  0           0  0  0
    0.2621    1.1379    0.0000 C   0  0  0  0  0  0           0  0  0
   -1.8621    0.2759    0.0000 N   0  0  0  0  0  0           0  0  0
   -1.2621    1.3138    0.0000 O   0  0  0  0  0  0           0  0  0
   -1.8621   -0.4448    0.0000 C   0  0  0  0  0  0           0  0  0
   -1.2621   -1.4862    0.0000 C   0  0  0  0  0  0           0  0  0
    1.1000   -0.0621    0.0000 S   0  0  0  0  0  0           0  0  0
    0.9379    1.2759    0.0000 C   0  0  0  0  0  0           0  0  0
   -2.4621   -0.8069    0.0000 O   0  0  0  0  0  0           0  0  0
    1.4621   -0.6621    0.0000 C   0  0  0  0  0  0           0  0  0
    1.1828    1.9379    0.0000 C   0  0  0  0  0  0           0  0  0
    2.1621   -0.6448    0.0000 C   0  0  0  0  0  0           0  0  0
    2.5000   -1.2621    0.0000 N   0  0  0  0  0  0           0  0  0
    2.5000   -0.0448    0.0000 O   0  0  0  0  0  0           0  0  0
  1  2  2  0     0  0
  1  3  1  0     0  0
  1  4  1  0     0  0
  2  5  1  0     0  0
  2  6  1  0     0  0
  3  7  1  0     0  0
  3  8  1  0     0  0
  4  9  1  0     0  0
  4 10  2  0     0  0
  6 11  1  0     0  0
  6 12  1  0     0  0
  7 13  1  0     0  0
  8 14  1  0     0  0
 11 15  2  0     0  0
 13 16  1  0     0  0
 14 17  1  0     0  0
 16 18  1  0     0  0
 18 19  1  0     0  0
 18 20  2  0     0  0
  5  7  2  0     0  0
  9 11  1  0     0  0
M  END
>  <IDNUMBER>
BAS 00491926

>  <BOX>
2

>  <CELL>
A4

>  <WEIGHT>
10.0

>  <MOL_WEIGHT>
297.34

>  <STRUCT_FORMULA>
C11H15N5O3S

>  <VENDOR_LOT>
145208

$$$$

          08231011372D 1   1.00000     0.00000     0

 18 19  0     0  0            999 V2000
   -0.3414    0.8345    0.0000 C   0  0  0  0  0  0           0  0  0
    0.4828    0.8345    0.0000 C   0  0  0  0  0  0           0  0  0
   -0.7552    0.1138    0.0000 C   0  0  0  0  0  0           0  0  0
   -0.7552    1.5448    0.0000 C   0  0  0  0  0  0           0  0  0
    0.8966    0.1207    0.0000 C   0  0  0  0  0  0           0  0  0
    0.8966    1.5448    0.0000 O   0  0  0  0  0  0           0  0  0
   -1.5793    0.1138    0.0000 C   0  0  0  0  0  0           0  0  0
   -1.5793    1.5448    0.0000 C   0  0  0  0  0  0           0  0  0
    0.4828   -0.5862    0.0000 C   0  0  0  0  0  0           0  0  0
    1.7207    0.1138    0.0000 C   0  0  0  0  0  0           0  0  0
   -1.9828    0.8345    0.0000 C   0  0  0  0  0  0           0  0  0
   -1.9931   -0.6000    0.0000 O   0  0  0  0  0  0           0  0  0
    0.8931   -1.3034    0.0000 C   0  0  0  0  0  0           0  0  0
    2.1207   -0.6000    0.0000 C   0  0  0  0  0  0           0  0  0
   -2.8069    0.8345    0.0000 N   0  0  0  0  0  0           0  0  0
    1.7069   -1.3034    0.0000 C   0  0  0  0  0  0           0  0  0
    0.4724   -2.0172    0.0000 O   0  0  0  0  0  0           0  0  0
    2.1207   -2.0172    0.0000 N   0  0  0  0  0  0           0  0  0
  1  2  1  0     0  0
  1  3  2  0     0  0
  1  4  1  0     0  0
  2  5  1  0     0  0
  2  6  2  0     0  0
  3  7  1  0     0  0
  4  8  2  0     0  0
  5  9  1  0     0  0
  5 10  2  0     0  0
  7 11  2  0     0  0
  7 12  1  0     0  0
  9 13  2  0     0  0
 10 14  1  0     0  0
 11 15  1  0     0  0
 13 16  1  0     0  0
 13 17  1  0     0  0
 16 18  1  0     0  0
  8 11  1  0     0  0
 14 16  2  0     0  0
M  END
>  <IDNUMBER>
BAS 00536434

>  <BOX>
2

>  <CELL>
A5

>  <WEIGHT>
10.0

>  <MOL_WEIGHT>
244.25

>  <STRUCT_FORMULA>
C13H12N2O3

>  <VENDOR_LOT>
331778

$$$$

          08231011372D 1   1.00000     0.00000     0

 19 20  0     0  0            999 V2000
   -0.2552    0.4310    0.0000 C   0  0  3  0  0  0           0  0  0
   -0.5759    0.2310    0.0000 C   0  0  0  0  0  0           0  0  0
   -0.2345    0.8103    0.0000 C   0  0  0  0  0  0           0  0  0
    0.0655    0.2310    0.0000 S   0  0  0  0  0  0           0  0  0
   -0.5759   -0.1310    0.0000 N   0  0  0  0  0  0           0  0  0
   -0.8931    0.4310    0.0000 O   0  0  0  0  0  0           0  0  0
    0.0862    0.9897    0.0000 C   0  0  0  0  0  0           0  0  0
    0.4069    0.4103    0.0000 C   0  0  0  0  0  0           0  0  0
   -0.2552   -0.3310    0.0000 C   0  0  0  0  0  0           0  0  0
    0.4069    0.7897    0.0000 N   0  0  0  0  0  0           0  0  0
    0.0862    1.3897    0.0000 O   0  0  0  0  0  0           0  0  0
    0.7241    0.2310    0.0000 N   0  0  0  0  0  0           0  0  0
   -0.2759   -0.7103    0.0000 C   0  0  0  0  0  0           0  0  0
    0.0655   -0.1310    0.0000 C   0  0  0  0  0  0           0  0  0
    0.0448   -0.8897    0.0000 C   0  0  0  0  0  0           0  0  0
    0.3862   -0.3103    0.0000 C   0  0  0  0  0  0           0  0  0
    0.3862   -0.7103    0.0000 C   0  0  0  0  0  0           0  0  0
    0.0448   -1.2690    0.0000 O   0  0  0  0  0  0           0  0  0
    0.3655   -1.4690    0.0000 C   0  0  0  0  0  0           0  0  0
  1  2  1  0     0  0
  1  3  1  0     0  0
  1  4  1  0     0  0
  2  5  1  0     0  0
  2  6  2  0     0  0
  3  7  1  0     0  0
  4  8  1  0     0  0
  5  9  1  0     0  0
  7 10  1  0     0  0
  7 11  2  0     0  0
  8 12  1  0     0  0
  9 13  2  0     0  0
  9 14  1  0     0  0
 13 15  1  0     0  0
 14 16  2  0     0  0
 15 17  2  0     0  0
 15 18  1  0     0  0
 18 19  1  0     0  0
  8 10  2  0     0  0
 16 17  1  0     0  0
M  END
>  <IDNUMBER>
BAS 01849468

>  <BOX>
2

>  <CELL>
A6

>  <WEIGHT>
10.0

>  <MOL_WEIGHT>
279.32

>  <STRUCT_FORMULA>
C12H13N3O3S

>  <VENDOR_LOT>
225530

$$$$

          08231011372D 1   1.00000     0.00000     0

 20 21  0     0  0            999 V2000
   -0.1793   -1.7069    0.0000 C   0  0  0  0  0  0           0  0  0
   -1.4517   -0.9690    0.0000 C   0  0  0  0  0  0           0  0  0
   -0.1793   -3.1586    0.0000 C   0  0  0  0  0  0           0  0  0
    1.0724   -0.9897    0.0000 C   0  0  0  0  0  0           0  0  0
   -1.4517    0.4793    0.0000 C   0  0  0  0  0  0           0  0  0
    1.0724   -3.8828    0.0000 N   0  0  0  0  0  0           0  0  0
   -1.4310   -3.9069    0.0000 O   0  0  0  0  0  0           0  0  0
    2.3345   -1.7207    0.0000 N   0  0  0  0  0  0           0  0  0
    1.0724    0.4586    0.0000 O   0  0  0  0  0  0           0  0  0
   -0.1931    1.2103    0.0000 C   0  0  0  0  0  0           0  0  0
   -2.7034    1.1966    0.0000 C   0  0  0  0  0  0           0  0  0
    2.3345   -3.1690    0.0000 C   0  0  0  0  0  0           0  0  0
   -0.1931    2.6586    0.0000 C   0  0  0  0  0  0           0  0  0
   -2.7034    2.6483    0.0000 C   0  0  0  0  0  0           0  0  0
   -3.9828    0.4690    0.0000 O   0  0  0  0  0  0           0  0  0
    3.5966   -3.9069    0.0000 O   0  0  0  0  0  0           0  0  0
   -1.4517    3.3690    0.0000 C   0  0  0  0  0  0           0  0  0
    1.0690    3.3966    0.0000 N   0  3  0  0  0  0           0  0  0
    1.0552    4.8517    0.0000 O   0  0  0  0  0  0           0  0  0
    2.3172    2.6793    0.0000 O   0  5  0  0  0  0           0  0  0
  1  2  2  0     0  0
  1  3  1  0     0  0
  1  4  1  0     0  0
  2  5  1  0     0  0
  3  6  1  0     0  0
  3  7  2  0     0  0
  4  8  1  0     0  0
  4  9  2  0     0  0
  5 10  2  0     0  0
  5 11  1  0     0  0
  6 12  1  0     0  0
 10 13  1  0     0  0
 11 14  2  0     0  0
 11 15  1  0     0  0
 12 16  2  0     0  0
 13 17  2  0     0  0
 13 18  1  0     0  0
 18 19  2  0     0  0
 18 20  1  0     0  0
  8 12  1  0     0  0
 14 17  1  0     0  0
M  CHG  2  18   1  20  -1
M  END
>  <IDNUMBER>
BAS 00069753

>  <BOX>
2

>  <CELL>
A7

>  <WEIGHT>
10.0

>  <MOL_WEIGHT>
277.19

>  <STRUCT_FORMULA>
C11H7N3O6

>  <VENDOR_LOT>
177356

$$$$

          08231011372D 1   1.00000     0.00000     0

 21 22  0     0  0            999 V2000
   -2.8172    0.1379    0.0000 C   0  0  0  0  0  0           0  0  0
   -2.1069    0.5483    0.0000 C   0  0  0  0  0  0           0  0  0
   -2.8276   -0.6897    0.0000 C   0  0  0  0  0  0           0  0  0
   -3.5310    0.5483    0.0000 N   0  0  0  0  0  0           0  0  0
   -1.3897    0.1379    0.0000 N   0  0  0  0  0  0           0  0  0
   -3.5379   -1.1000    0.0000 C   0  0  0  0  0  0           0  0  0
   -4.2517    0.1414    0.0000 C   0  0  0  0  0  0           0  0  0
   -0.6759    0.5483    0.0000 C   0  0  0  0  0  0           0  0  0
   -4.2517   -0.6828    0.0000 C   0  0  0  0  0  0           0  0  0
    0.0345    0.1379    0.0000 C   0  0  0  0  0  0           0  0  0
   -0.6759    1.3759    0.0000 O   0  0  0  0  0  0           0  0  0
    0.7483    0.5483    0.0000 N   0  0  0  0  0  0           0  0  0
    0.0345   -0.6897    0.0000 O   0  0  0  0  0  0           0  0  0
    1.4621    0.1379    0.0000 N   0  0  0  0  0  0           0  0  0
    2.1828    0.5483    0.0000 C   0  0  0  0  0  0           0  0  0
    2.8931    0.1379    0.0000 C   0  0  0  0  0  0           0  0  0
    3.5966    0.5552    0.0000 C   0  0  0  0  0  0           0  0  0
    2.8862   -0.6897    0.0000 C   0  0  0  0  0  0           0  0  0
    4.3207    0.1379    0.0000 C   0  0  0  0  0  0           0  0  0
    3.5966   -1.1000    0.0000 C   0  0  0  0  0  0           0  0  0
    4.3103   -0.6897    0.0000 N   0  0  0  0  0  0           0  0  0
  1  2  1  0     0  0
  1  3  2  0     0  0
  1  4  1  0     0  0
  2  5  1  0     0  0
  3  6  1  0     0  0
  4  7  2  0     0  0
  5  8  1  0     0  0
  6  9  2  0     0  0
  8 10  1  0     0  0
  8 11  2  0     0  0
 10 12  1  0     0  0
 10 13  2  0     0  0
 12 14  1  0     0  0
 14 15  2  0     0  0
 15 16  1  0     0  0
 16 17  1  0     0  0
 16 18  2  0     0  0
 17 19  2  0     0  0
 18 20  1  0     0  0
 19 21  1  0     0  0
  7  9  1  0     0  0
 20 21  2  0     0  0
M  END
>  <IDNUMBER>
BAS 00753711

>  <BOX>
2

>  <CELL>
A8

>  <WEIGHT>
10.0

>  <MOL_WEIGHT>
283.29

>  <STRUCT_FORMULA>
C14H13N5O2

>  <VENDOR_LOT>
30110

$$$$

          08231011372D 1   1.00000     0.00000     0

 18 19  0     0  0            999 V2000
   -0.9379   -0.3310    0.0000 C   0  0  0  0  0  0           0  0  0
   -2.2448   -0.8138    0.0000 C   0  0  0  0  0  0           0  0  0
    0.1552   -1.2310    0.0000 C   0  0  0  0  0  0           0  0  0
   -0.6966    1.0586    0.0000 C   0  0  0  0  0  0           0  0  0
   -2.5586   -2.2034    0.0000 C   0  0  0  0  0  0           0  0  0
   -3.4897   -0.1034    0.0000 N   0  0  0  0  0  0           0  0  0
    1.4793   -0.7414    0.0000 C   0  0  0  0  0  0           0  0  0
    0.6241    1.5690    0.0000 C   0  0  0  0  0  0           0  0  0
   -3.9759   -2.3414    0.0000 N   0  0  0  0  0  0           0  0  0
   -4.5448   -1.0621    0.0000 C   0  0  0  0  0  0           0  0  0
    1.7276    0.6586    0.0000 C   0  0  0  0  0  0           0  0  0
    2.5552   -1.6552    0.0000 N   0  3  0  0  0  0           0  0  0
    0.8241    2.9690    0.0000 N   0  3  0  0  0  0           0  0  0
    3.0621    1.1241    0.0000 N   0  0  0  0  0  0           0  0  0
    3.8759   -1.1310    0.0000 O   0  0  0  0  0  0           0  0  0
    2.3103   -3.0552    0.0000 O   0  5  0  0  0  0           0  0  0
   -0.2897    3.8069    0.0000 O   0  0  0  0  0  0           0  0  0
    2.1276    3.4828    0.0000 O   0  5  0  0  0  0           0  0  0
  1  2  1  0     0  0
  1  3  2  0     0  0
  1  4  1  0     0  0
  2  5  2  0     0  0
  2  6  1  0     0  0
  3  7  1  0     0  0
  4  8  2  0     0  0
  5  9  1  0     0  0
  6 10  2  0     0  0
  7 11  2  0     0  0
  7 12  1  0     0  0
  8 13  1  0     0  0
 11 14  1  0     0  0
 12 15  2  0     0  0
 12 16  1  0     0  0
 13 17  2  0     0  0
 13 18  1  0     0  0
  8 11  1  0     0  0
  9 10  1  0     0  0
M  CHG  4  12   1  13   1  16  -1  18  -1
M  END
>  <IDNUMBER>
BAS 00288687

>  <BOX>
2

>  <CELL>
A9

>  <WEIGHT>
10.0

>  <MOL_WEIGHT>
249.19

>  <STRUCT_FORMULA>
C9H7N5O4

>  <VENDOR_LOT>
146132

$$$$

          08231011372D 1   1.00000     0.00000     0

 20 22  0     0  0            999 V2000
   -1.5207   -1.5552    0.0000 C   0  0  0  0  0  0           0  0  0
   -2.1414   -1.2034    0.0000 C   0  0  0  0  0  0           0  0  0
   -0.9000   -1.2034    0.0000 C   0  0  0  0  0  0           0  0  0
   -1.6690   -2.2552    0.0000 O   0  0  0  0  0  0           0  0  0
   -2.1414   -0.4828    0.0000 C   0  0  0  0  0  0           0  0  0
   -2.6655   -1.6793    0.0000 O   0  0  0  0  0  0           0  0  0
   -0.9000   -0.4828    0.0000 C   0  0  0  0  0  0           0  0  0
   -2.3793   -2.3310    0.0000 C   0  0  0  0  0  0           0  0  0
   -1.5207   -0.1172    0.0000 C   0  0  0  0  0  0           0  0  0
   -0.2103   -0.1241    0.0000 C   0  0  0  0  0  0           0  0  0
    0.3724   -0.4276    0.0000 C   0  0  0  0  0  0           0  0  0
   -0.2069    0.8862    0.0000 O   0  0  0  0  0  0           0  0  0
    1.0276    0.0138    0.0000 C   0  0  0  0  0  0           0  0  0
    1.0172    0.9103    0.0000 N   0  0  0  0  0  0           0  0  0
    1.6621    1.2931    0.0000 C   0  0  0  0  0  0           0  0  0
    1.6517    2.0448    0.0000 C   0  0  0  0  0  0           0  0  0
    2.3138    0.9241    0.0000 N   0  0  0  0  0  0           0  0  0
    2.3000    2.4241    0.0000 C   0  0  0  0  0  0           0  0  0
    2.9586    1.3069    0.0000 C   0  0  0  0  0  0           0  0  0
    2.9517    2.0552    0.0000 C   0  0  0  0  0  0           0  0  0
  1  2  2  0     0  0
  1  3  1  0     0  0
  1  4  1  0     0  0
  2  5  1  0     0  0
  2  6  1  0     0  0
  3  7  2  0     0  0
  4  8  1  0     0  0
  5  9  2  0     0  0
  7 10  1  0     0  0
 10 11  1  0     0  0
 10 12  2  0     0  0
 11 13  2  0     0  0
 13 14  1  0     0  0
 14 15  1  0     0  0
 15 16  2  0     0  0
 15 17  1  0     0  0
 16 18  1  0     0  0
 17 19  2  0     0  0
 18 20  2  0     0  0
  6  8  1  0     0  0
  7  9  1  0     0  0
 19 20  1  0     0  0
M  END
>  <IDNUMBER>
BAS 01357758

>  <BOX>
2

>  <CELL>
A10

>  <WEIGHT>
10.0

>  <MOL_WEIGHT>
268.27

>  <STRUCT_FORMULA>
C15H12N2O3

>  <VENDOR_LOT>
178150

$$$$

          08231011372D 1   1.00000     0.00000     0

 20 21  0     0  0            999 V2000
   -1.0207    0.4690    0.0000 C   0  0  0  0  0  0           0  0  0
    0.3276    0.4621    0.0000 N   0  0  3  0  0  0           0  0  0
   -1.0207   -0.3069    0.0000 C   0  0  0  0  0  0           0  0  0
   -1.7034    0.8621    0.0000 C   0  0  0  0  0  0           0  0  0
    0.3172   -0.3276    0.0000 C   0  0  0  0  0  0           0  0  0
    1.0414    0.8724    0.0000 C   0  0  0  0  0  0           0  0  0
   -0.3552   -0.7069    0.0000 N   0  0  0  0  0  0           0  0  0
   -1.7034   -0.7000    0.0000 N   0  0  3  0  0  0           0  0  0
   -2.3724    0.4690    0.0000 N   0  0  0  0  0  0           0  0  0
   -1.7034    1.6448    0.0000 O   0  0  0  0  0  0           0  0  0
    0.9828   -0.7069    0.0000 S   0  0  0  0  0  0           0  0  0
    1.7552    0.4690    0.0000 C   0  0  0  0  0  0           0  0  0
   -2.3724   -0.3172    0.0000 C   0  0  0  0  0  0           0  0  0
   -1.7034   -1.4793    0.0000 C   0  0  0  0  0  0           0  0  0
    1.6448   -0.3276    0.0000 C   0  0  0  0  0  0           0  0  0
    2.4655    0.8828    0.0000 C   0  0  0  0  0  0           0  0  0
   -3.0517   -0.7069    0.0000 O   0  0  0  0  0  0           0  0  0
    2.3172   -0.7069    0.0000 C   0  0  0  0  0  0           0  0  0
    3.1793    0.4690    0.0000 C   0  0  0  0  0  0           0  0  0
    2.9828   -0.3276    0.0000 O   0  0  0  0  0  0           0  0  0
  1  2  1  0     0  0
  1  3  2  0     0  0
  1  4  1  0     0  0
  2  5  1  0     0  0
  2  6  1  0     0  0
  3  7  1  0     0  0
  3  8  1  0     0  0
  4  9  1  0     0  0
  4 10  2  0     0  0
  5 11  1  0     0  0
  6 12  1  0     0  0
  8 13  1  0     0  0
  8 14  1  0     0  0
 11 15  1  0     0  0
 12 16  2  0     0  0
 13 17  2  0     0  0
 15 18  1  0     0  0
 16 19  1  0     0  0
 18 20  1  0     0  0
  5  7  2  0     0  0
  9 13  1  0     0  0
M  END
>  <IDNUMBER>
BAS 00964813

>  <BOX>
2

>  <CELL>
A11

>  <WEIGHT>
10.0

>  <MOL_WEIGHT>
296.35

>  <STRUCT_FORMULA>
C12H16N4O3S

>  <VENDOR_LOT>
124792

$$$$

          08231011372D 1   1.00000     0.00000     0

 20 22  0     0  0            999 V2000
    0.9310    0.0966    0.0000 N   0  0  3  0  0  0           0  0  0
   -0.2310    0.0966    0.0000 C   0  0  0  0  0  0           0  0  0
    1.4103    0.5448    0.0000 C   0  0  0  0  0  0           0  0  0
    0.9310   -0.5724    0.0000 C   0  0  0  0  0  0           0  0  0
   -0.2310   -0.5724    0.0000 C   0  0  0  0  0  0           0  0  0
   -0.8138    0.4276    0.0000 C   0  0  0  0  0  0           0  0  0
    1.2621    1.1966    0.0000 C   0  0  0  0  0  0           0  0  0
    2.0621    0.3655    0.0000 C   0  0  0  0  0  0           0  0  0
    0.3483   -0.9103    0.0000 N   0  0  0  0  0  0           0  0  0
    1.5207   -0.9207    0.0000 C   0  0  0  0  0  0           0  0  0
   -0.8138   -0.9103    0.0000 C   0  0  0  0  0  0           0  0  0
   -1.3897    0.0966    0.0000 C   0  0  0  0  0  0           0  0  0
    1.7345    1.6448    0.0000 C   0  0  0  0  0  0           0  0  0
    2.5310    0.8276    0.0000 C   0  0  0  0  0  0           0  0  0
   -1.3897   -0.5724    0.0000 C   0  0  0  0  0  0           0  0  0
    2.3621    1.4655    0.0000 C   0  0  0  0  0  0           0  0  0
   -1.9690   -0.9103    0.0000 N   0  0  0  0  0  0           0  0  0
   -2.5517   -0.5724    0.0000 C   0  0  0  0  0  0           0  0  0
   -2.5517    0.0966    0.0000 C   0  0  0  0  0  0           0  0  0
   -3.1517   -0.9207    0.0000 O   0  0  0  0  0  0           0  0  0
  1  2  1  0     0  0
  1  3  1  0     0  0
  1  4  1  0     0  0
  2  5  2  0     0  0
  2  6  1  0     0  0
  3  7  1  0     0  0
  3  8  2  0     0  0
  4  9  2  0     0  0
  4 10  1  0     0  0
  5 11  1  0     0  0
  6 12  2  0     0  0
  7 13  2  0     0  0
  8 14  1  0     0  0
 11 15  2  0     0  0
 13 16  1  0     0  0
 15 17  1  0     0  0
 17 18  1  0     0  0
 18 19  1  0     0  0
 18 20  2  0     0  0
  5  9  1  0     0  0
 12 15  1  0     0  0
 14 16  2  0     0  0
M  END
>  <IDNUMBER>
BAS 00004212

>  <BOX>
2

>  <CELL>
A12

>  <WEIGHT>
10.0

>  <MOL_WEIGHT>
265.31

>  <STRUCT_FORMULA>
C16H15N3O

>  <VENDOR_LOT>
177016

$$$$

          08231011372D 1   1.00000     0.00000     0

 19 20  0     0  0            999 V2000
   -0.3586   -0.0034    0.0000 N   0  0  3  0  0  0           0  0  0
   -1.0966   -0.3310    0.0000 C   0  0  0  0  0  0           0  0  0
    0.3552   -0.3310    0.0000 C   0  0  0  0  0  0           0  0  0
   -0.2690    0.7966    0.0000 C   0  0  0  0  0  0           0  0  0
   -1.7310    0.1414    0.0000 C   0  0  0  0  0  0           0  0  0
   -1.1793   -1.1069    0.0000 C   0  0  0  0  0  0           0  0  0
    0.8897    0.2690    0.0000 C   0  0  3  0  0  0           0  0  0
    0.5414   -1.1034    0.0000 O   0  0  0  0  0  0           0  0  0
    0.5034    0.9690    0.0000 C   0  0  0  0  0  0           0  0  0
   -0.8690    1.3310    0.0000 O   0  0  0  0  0  0           0  0  0
   -2.4586   -0.1828    0.0000 C   0  0  0  0  0  0           0  0  0
   -1.8966   -1.4414    0.0000 C   0  0  0  0  0  0           0  0  0
    1.6828    0.1931    0.0000 S   0  0  0  0  0  0           0  0  0
   -2.5552   -0.9690    0.0000 C   0  0  0  0  0  0           0  0  0
    2.1414    0.8483    0.0000 C   0  0  0  0  0  0           0  0  0
   -3.2931   -1.3034    0.0000 F   0  0  0  0  0  0           0  0  0
    2.9310    0.7690    0.0000 C   0  0  0  0  0  0           0  0  0
    3.4034    1.4172    0.0000 O   0  0  0  0  0  0           0  0  0
    3.2690    0.0414    0.0000 O   0  0  0  0  0  0           0  0  0
  1  2  1  0     0  0
  1  3  1  0     0  0
  1  4  1  0     0  0
  2  5  2  0     0  0
  2  6  1  0     0  0
  3  7  1  0     0  0
  3  8  2  0     0  0
  4  9  1  0     0  0
  4 10  2  0     0  0
  5 11  1  0     0  0
  6 12  2  0     0  0
  7 13  1  0     0  0
 11 14  2  0     0  0
 13 15  1  0     0  0
 14 16  1  0     0  0
 15 17  1  0     0  0
 17 18  1  0     0  0
 17 19  2  0     0  0
  7  9  1  0     0  0
 12 14  1  0     0  0
M  END
>  <IDNUMBER>
BAS 00702460

>  <BOX>
2

>  <CELL>
B1

>  <WEIGHT>
10.0

>  <MOL_WEIGHT>
283.28

>  <STRUCT_FORMULA>
C12H10FNO4S

>  <VENDOR_LOT>
35351

$$$$

          08231011372D 1   1.00000     0.00000     0

 20 21  0     0  0            999 V2000
   -0.8690    0.8414    0.0000 C   0  0  0  0  0  0           0  0  0
   -0.1069    1.0897    0.0000 C   0  0  0  0  0  0           0  0  0
   -1.4207    1.3621    0.0000 C   0  0  0  0  0  0           0  0  0
   -1.0552    0.0621    0.0000 C   0  0  0  0  0  0           0  0  0
    0.4931    0.5724    0.0000 C   0  0  0  0  0  0           0  0  0
   -2.1552    1.1517    0.0000 N   0  0  0  0  0  0           0  0  0
   -1.2517    2.1345    0.0000 O   0  0  0  0  0  0           0  0  0
   -1.8034   -0.1379    0.0000 N   0  0  0  0  0  0           0  0  0
   -0.5034   -0.5138    0.0000 O   0  0  0  0  0  0           0  0  0
    1.2448    0.8103    0.0000 C   0  0  0  0  0  0           0  0  0
    0.3448   -0.1897    0.0000 C   0  0  0  0  0  0           0  0  0
   -2.3690    0.3897    0.0000 C   0  0  0  0  0  0           0  0  0
    1.8241    0.3241    0.0000 C   0  0  0  0  0  0           0  0  0
    0.8966   -0.6897    0.0000 C   0  0  0  0  0  0           0  0  0
   -3.1207    0.1621    0.0000 S   0  0  0  0  0  0           0  0  0
    1.6483   -0.4483    0.0000 C   0  0  0  0  0  0           0  0  0
    2.2241   -0.9655    0.0000 N   0  0  0  0  0  0           0  0  0
    2.0483   -1.7276    0.0000 C   0  0  0  0  0  0           0  0  0
    1.3103   -1.9655    0.0000 C   0  0  0  0  0  0           0  0  0
    2.6241   -2.2586    0.0000 O   0  0  0  0  0  0           0  0  0
  1  2  2  0     0  0
  1  3  1  0     0  0
  1  4  1  0     0  0
  2  5  1  0     0  0
  3  6  1  0     0  0
  3  7  2  0     0  0
  4  8  1  0     0  0
  4  9  2  0     0  0
  5 10  2  0     0  0
  5 11  1  0     0  0
  6 12  1  0     0  0
 10 13  1  0     0  0
 11 14  2  0     0  0
 12 15  2  0     0  0
 13 16  2  0     0  0
 16 17  1  0     0  0
 17 18  1  0     0  0
 18 19  1  0     0  0
 18 20  2  0     0  0
  8 12  1  0     0  0
 14 16  1  0     0  0
M  END
>  <IDNUMBER>
BAS 00867832

>  <BOX>
2

>  <CELL>
B2

>  <WEIGHT>
10.0

>  <MOL_WEIGHT>
289.31

>  <STRUCT_FORMULA>
C13H11N3O3S

>  <VENDOR_LOT>
31701

$$$$

          08231011372D 1   1.00000     0.00000     0

 22 24  0     0  0            999 V2000
   -0.6241   -0.6414    0.0000 C   0  0  3  0  0  0           0  0  0
   -0.6207    0.1828    0.0000 C   0  0  3  0  0  0           0  0  0
   -1.3448   -1.0448    0.0000 C   0  0  3  0  0  0           0  0  0
    0.0793   -1.0586    0.0000 C   0  0  0  0  0  0           0  0  0
   -1.1207   -0.4966    0.0000 C   0  0  0  0  0  0           0  0  0
   -1.3310    0.6034    0.0000 C   0  0  0  0  0  0           0  0  0
   -2.0586   -0.6207    0.0000 C   0  0  3  0  0  0           0  0  0
   -1.3586   -1.8690    0.0000 C   0  0  0  0  0  0           0  0  0
    0.8069   -0.6586    0.0000 N   0  0  0  0  0  0           0  0  0
    0.0759   -1.8828    0.0000 O   0  0  0  0  0  0           0  0  0
   -2.0483    0.2034    0.0000 C   0  0  0  0  0  0           0  0  0
   -2.0828   -2.2793    0.0000 O   0  0  0  0  0  0           0  0  0
   -0.6483   -2.2966    0.0000 O   0  0  0  0  0  0           0  0  0
    0.8069    0.1655    0.0000 C   0  0  0  0  0  0           0  0  0
    1.5276    0.5793    0.0000 C   0  0  0  0  0  0           0  0  0
    0.0931    0.5793    0.0000 C   0  0  0  0  0  0           0  0  0
    1.5276    1.4103    0.0000 C   0  0  0  0  0  0           0  0  0
    0.0931    1.4103    0.0000 C   0  0  0  0  0  0           0  0  0
    0.8069    1.8207    0.0000 C   0  0  0  0  0  0           0  0  0
    2.2379    1.8207    0.0000 C   0  0  0  0  0  0           0  0  0
    2.2310    2.6448    0.0000 C   0  0  0  0  0  0           0  0  0
    2.9552    1.4172    0.0000 O   0  0  0  0  0  0           0  0  0
  1  2  1  0     0  0
  1  3  1  0     0  0
  1  4  1  0     0  0
  2  5  1  0     0  0
  2  6  1  0     0  0
  3  7  1  0     0  0
  3  8  1  0     0  0
  4  9  1  0     0  0
  4 10  2  0     0  0
  6 11  2  0     0  0
  8 12  1  0     0  0
  8 13  2  0     0  0
  9 14  1  0     0  0
 14 15  2  0     0  0
 14 16  1  0     0  0
 15 17  1  0     0  0
 16 18  2  0     0  0
 17 19  2  0     0  0
 17 20  1  0     0  0
 20 21  1  0     0  0
 20 22  2  0     0  0
  5  7  1  0     0  0
  7 11  1  0     0  0
 18 19  1  0     0  0
M  END
>  <IDNUMBER>
BAS 00680387

>  <BOX>
2

>  <CELL>
B3

>  <WEIGHT>
10.0

>  <MOL_WEIGHT>
299.32

>  <STRUCT_FORMULA>
C17H17NO4

>  <VENDOR_LOT>
4572

$$$$

          08231011372D 1   1.00000     0.00000     0

 20 22  0     0  0            999 V2000
   -2.0828   -0.1310    0.0000 C   0  0  0  0  0  0           0  0  0
   -1.4448    1.0069    0.0000 C   0  0  0  0  0  0           0  0  0
   -1.4276   -1.2448    0.0000 C   0  0  0  0  0  0           0  0  0
   -3.3828   -0.1310    0.0000 C   0  0  0  0  0  0           0  0  0
   -0.1448    1.0069    0.0000 C   0  0  0  0  0  0           0  0  0
   -2.1034    2.1483    0.0000 C   0  0  0  0  0  0           0  0  0
   -0.1276   -1.2448    0.0000 N   0  0  0  0  0  0           0  0  0
   -2.0655   -2.3828    0.0000 C   0  0  0  0  0  0           0  0  0
   -4.0276   -1.2448    0.0000 C   0  0  0  0  0  0           0  0  0
    0.5345   -0.1034    0.0000 C   0  0  0  0  0  0           0  0  0
   -1.4655    3.2517    0.0000 O   0  0  0  0  0  0           0  0  0
   -3.4034    2.1172    0.0000 O   0  0  0  0  0  0           0  0  0
   -3.3655   -2.3828    0.0000 C   0  0  0  0  0  0           0  0  0
    1.8345   -0.1034    0.0000 C   0  0  0  0  0  0           0  0  0
    2.4724    1.0345    0.0000 C   0  0  0  0  0  0           0  0  0
    2.4724   -1.2138    0.0000 C   0  0  0  0  0  0           0  0  0
    3.7724    1.0345    0.0000 C   0  0  0  0  0  0           0  0  0
    3.7724   -1.2138    0.0000 C   0  0  0  0  0  0           0  0  0
    4.4345   -0.1034    0.0000 C   0  0  0  0  0  0           0  0  0
    5.7345   -0.1034    0.0000 N   0  0  0  0  0  0           0  0  0
  1  2  2  0     0  0
  1  3  1  0     0  0
  1  4  1  0     0  0
  2  5  1  0     0  0
  2  6  1  0     0  0
  3  7  2  0     0  0
  3  8  1  0     0  0
  4  9  2  0     0  0
  5 10  2  0     0  0
  6 11  1  0     0  0
  6 12  2  0     0  0
  8 13  2  0     0  0
 10 14  1  0     0  0
 14 15  1  0     0  0
 14 16  2  0     0  0
 15 17  2  0     0  0
 16 18  1  0     0  0
 17 19  1  0     0  0
 19 20  1  0     0  0
  7 10  1  0     0  0
  9 13  1  0     0  0
 18 19  2  0     0  0
M  END
>  <IDNUMBER>
BAS 03840600

>  <BOX>
2

>  <CELL>
B4

>  <WEIGHT>
10.0

>  <MOL_WEIGHT>
264.28

>  <STRUCT_FORMULA>
C16H12N2O2

>  <VENDOR_LOT>
359235

$$$$

          08231011372D 1   1.00000     0.00000     0

 21 22  0     0  0            999 V2000
   -1.0759    0.6586    0.0000 N   0  3  0  0  0  0           0  0  0
   -1.4414    1.3069    0.0000 C   0  0  0  0  0  0           0  0  0
   -1.4414    0.0241    0.0000 C   0  0  0  0  0  0           0  0  0
   -0.3414    0.6586    0.0000 C   0  0  0  0  0  0           0  0  0
   -2.1759    1.3069    0.0000 C   0  0  0  0  0  0           0  0  0
   -2.1552    0.0241    0.0000 C   0  0  0  0  0  0           0  0  0
    0.0241    0.0241    0.0000 C   0  0  0  0  0  0           0  0  0
   -2.5207    0.6586    0.0000 C   0  0  0  0  0  0           0  0  0
   -2.5552    1.9448    0.0000 C   0  0  0  0  0  0           0  0  0
    0.7586    0.0241    0.0000 C   0  0  0  0  0  0           0  0  0
   -2.2034    2.5586    0.0000 N   0  0  0  0  0  0           0  0  0
   -3.3034    1.9448    0.0000 O   0  0  0  0  0  0           0  0  0
    1.1241   -0.5931    0.0000 N   0  3  0  0  0  0           0  0  0
    1.8448   -0.5931    0.0000 C   0  0  0  0  0  0           0  0  0
    0.7586   -1.2414    0.0000 C   0  0  0  0  0  0           0  0  0
    2.1966   -1.2414    0.0000 C   0  0  0  0  0  0           0  0  0
    1.1241   -1.8759    0.0000 C   0  0  0  0  0  0           0  0  0
    1.8448   -1.8759    0.0000 C   0  0  0  0  0  0           0  0  0
    2.9448   -1.2414    0.0000 C   0  0  0  0  0  0           0  0  0
    3.2966   -1.8759    0.0000 N   0  0  0  0  0  0           0  0  0
    3.2966   -0.5931    0.0000 O   0  0  0  0  0  0           0  0  0
  1  2  2  0     0  0
  1  3  1  0     0  0
  1  4  1  0     0  0
  2  5  1  0     0  0
  3  6  2  0     0  0
  4  7  1  0     0  0
  5  8  2  0     0  0
  5  9  1  0     0  0
  7 10  1  0     0  0
  9 11  1  0     0  0
  9 12  2  0     0  0
 10 13  1  0     0  0
 13 14  1  0     0  0
 13 15  2  0     0  0
 14 16  2  0     0  0
 15 17  1  0     0  0
 16 18  1  0     0  0
 16 19  1  0     0  0
 19 20  1  0     0  0
 19 21  2  0     0  0
  6  8  1  0     0  0
 17 18  2  0     0  0
M  CHG  2   1   1  13   1
M  END
>  <IDNUMBER>
BAS 00229901

>  <SALTDATA>
2 Br-

>  <BOX>
2

>  <CELL>
B5

>  <WEIGHT>
10.0

>  <MOL_WEIGHT>
286.33

>  <STRUCT_FORMULA>
C15H18N4O2

>  <VENDOR_LOT>
255733

$$$$

          08231011372D 1   1.00000     0.00000     0

 21 22  0     0  0            999 V2000
    0.0000   -0.7966    0.0000 C   0  0  3  0  0  0           0  0  0
    0.9172   -1.3276    0.0000 C   0  0  0  0  0  0           0  0  0
   -0.9207   -1.3483    0.0000 C   0  0  0  0  0  0           0  0  0
    0.0000    0.2655    0.0000 C   0  0  0  0  0  0           0  0  0
    0.9172   -2.3966    0.0000 C   0  0  0  0  0  0           0  0  0
    1.8517   -0.7966    0.0000 C   0  0  0  0  0  0           0  0  0
   -0.9207   -2.3966    0.0000 C   0  0  0  0  0  0           0  0  0
   -1.8483   -0.8276    0.0000 C   0  0  0  0  0  0           0  0  0
    0.9172    0.7862    0.0000 C   0  0  0  0  0  0           0  0  0
   -0.9207    0.7862    0.0000 C   0  0  0  0  0  0           0  0  0
    0.0000   -2.9276    0.0000 S   0  0  0  0  0  0           0  0  0
    1.8517   -2.9345    0.0000 N   0  0  0  0  0  0           0  0  0
    2.7621   -0.2517    0.0000 N   0  0  0  0  0  0           0  0  0
   -1.8483   -2.9345    0.0000 N   0  0  0  0  0  0           0  0  0
   -2.7586   -0.2966    0.0000 N   0  0  0  0  0  0           0  0  0
    0.9172    1.8483    0.0000 C   0  0  0  0  0  0           0  0  0
   -0.9207    1.8517    0.0000 C   0  0  0  0  0  0           0  0  0
    0.0000    2.3655    0.0000 C   0  0  0  0  0  0           0  0  0
    0.0000    3.4241    0.0000 N   0  3  0  0  0  0           0  0  0
   -0.9207    3.9483    0.0000 O   0  0  0  0  0  0           0  0  0
    0.9172    3.9483    0.0000 O   0  5  0  0  0  0           0  0  0
  1  2  1  0     0  0
  1  3  1  0     0  0
  1  4  1  0     0  0
  2  5  2  0     0  0
  2  6  1  0     0  0
  3  7  2  0     0  0
  3  8  1  0     0  0
  4  9  1  0     0  0
  4 10  2  0     0  0
  5 11  1  0     0  0
  5 12  1  0     0  0
  6 13  3  0     0  0
  7 14  1  0     0  0
  8 15  3  0     0  0
  9 16  2  0     0  0
 10 17  1  0     0  0
 16 18  1  0     0  0
 18 19  1  0     0  0
 19 20  2  0     0  0
 19 21  1  0     0  0
  7 11  1  0     0  0
 17 18  2  0     0  0
M  CHG  2  19   1  21  -1
M  END
>  <IDNUMBER>
BAS 00918380

>  <BOX>
2

>  <CELL>
B6

>  <WEIGHT>
10.0

>  <MOL_WEIGHT>
299.31

>  <STRUCT_FORMULA>
C13H9N5O2S

>  <VENDOR_LOT>
51462

$$$$

          08231011372D 1   1.00000     0.00000     0

 18 20  0     0  0            999 V2000
    0.1931    0.0207    0.0000 C   0  0  3  0  0  0           0  0  0
   -0.3862   -0.3069    0.0000 C   0  0  0  0  0  0           0  0  0
    0.1931    0.7345    0.0000 C   0  0  0  0  0  0           0  0  0
    0.7690   -0.3069    0.0000 C   0  0  0  0  0  0           0  0  0
   -0.3862   -0.9655    0.0000 C   0  0  0  0  0  0           0  0  0
   -1.5483   -0.3069    0.0000 C   0  0  0  0  0  0           0  0  0
   -0.4310    1.0931    0.0000 C   0  0  0  0  0  0           0  0  0
    0.7517    1.4345    0.0000 O   0  0  0  0  0  0           0  0  0
    0.7690   -0.9655    0.0000 C   0  0  0  0  0  0           0  0  0
    1.3931    0.0414    0.0000 C   0  0  0  0  0  0           0  0  0
    0.1931   -1.2966    0.0000 O   0  0  0  0  0  0           0  0  0
   -0.9690   -1.2966    0.0000 N   0  0  0  0  0  0           0  0  0
   -1.5483   -0.9655    0.0000 N   0  0  0  0  0  0           0  0  0
   -2.1552    0.0345    0.0000 C   0  0  0  0  0  0           0  0  0
   -0.4310    1.8034    0.0000 C   0  0  0  0  0  0           0  0  0
    0.1931    2.1690    0.0000 C   0  0  0  0  0  0           0  0  0
    1.3828   -1.3172    0.0000 N   0  0  0  0  0  0           0  0  0
    2.0034    0.3931    0.0000 N   0  0  0  0  0  0           0  0  0
  1  2  1  0     0  0
  1  3  1  0     0  0
  1  4  1  0     0  0
  2  5  2  0     0  0
  2  6  1  0     0  0
  3  7  2  0     0  0
  3  8  1  0     0  0
  4  9  2  0     0  0
  4 10  1  0     0  0
  5 11  1  0     0  0
  5 12  1  0     0  0
  6 13  2  0     0  0
  6 14  1  0     0  0
  7 15  1  0     0  0
  8 16  1  0     0  0
  9 17  1  0     0  0
 10 18  3  0     0  0
  9 11  1  0     0  0
 12 13  1  0     0  0
 15 16  2  0     0  0
M  END
>  <IDNUMBER>
BAS 01235110

>  <BOX>
2

>  <CELL>
B7

>  <WEIGHT>
10.0

>  <MOL_WEIGHT>
242.24

>  <STRUCT_FORMULA>
C12H10N4O2

>  <VENDOR_LOT>
331034

$$$$

          08231011372D 1   1.00000     0.00000     0

 18 19  0     0  0            999 V2000
    1.6931    0.4966    0.0000 C   0  0  0  0  0  0           0  0  0
    3.0724    0.4966    0.0000 N   0  0  3  0  0  0           0  0  0
    1.0138   -0.6828    0.0000 N   0  0  0  0  0  0           0  0  0
    1.2724    1.7759    0.0000 S   0  0  0  0  0  0           0  0  0
    3.4931    1.7759    0.0000 C   0  0  0  0  0  0           0  0  0
    3.8931   -0.6241    0.0000 C   0  0  0  0  0  0           0  0  0
   -0.3483   -0.6828    0.0000 C   0  0  0  0  0  0           0  0  0
    2.3931    2.5759    0.0000 C   0  0  0  0  0  0           0  0  0
    4.7931    2.2172    0.0000 O   0  0  0  0  0  0           0  0  0
    3.3517   -1.8828    0.0000 C   0  0  0  0  0  0           0  0  0
   -1.0276    0.4966    0.0000 C   0  0  0  0  0  0           0  0  0
   -1.0276   -1.8621    0.0000 C   0  0  0  0  0  0           0  0  0
   -2.4069    0.4966    0.0000 C   0  0  0  0  0  0           0  0  0
   -2.3862   -1.8621    0.0000 C   0  0  0  0  0  0           0  0  0
   -3.0862   -0.6828    0.0000 C   0  0  0  0  0  0           0  0  0
   -4.4483   -0.6828    0.0000 C   0  0  0  0  0  0           0  0  0
   -5.1276   -1.8621    0.0000 O   0  0  0  0  0  0           0  0  0
   -5.1276    0.4966    0.0000 O   0  0  0  0  0  0           0  0  0
  1  2  1  0     0  0
  1  3  2  0     0  0
  1  4  1  0     0  0
  2  5  1  0     0  0
  2  6  1  0     0  0
  3  7  1  0     0  0
  4  8  1  0     0  0
  5  9  2  0     0  0
  6 10  1  0     0  0
  7 11  2  0     0  0
  7 12  1  0     0  0
 11 13  1  0     0  0
 12 14  2  0     0  0
 13 15  2  0     0  0
 15 16  1  0     0  0
 16 17  1  0     0  0
 16 18  2  0     0  0
  5  8  1  0     0  0
 14 15  1  0     0  0
M  END
>  <IDNUMBER>
BAS 01550333

>  <BOX>
2

>  <CELL>
B8

>  <WEIGHT>
10.0

>  <MOL_WEIGHT>
264.30

>  <STRUCT_FORMULA>
C12H12N2O3S

>  <VENDOR_LOT>
225411

$$$$

          08231011372D 1   1.00000     0.00000     0

 21 23  0     0  0            999 V2000
    0.0310   -0.3517    0.0000 C   0  0  3  0  0  0           0  0  0
   -0.7828   -0.8207    0.0000 C   0  0  0  0  0  0           0  0  0
   -0.0310    0.7655    0.0000 C   0  0  0  0  0  0           0  0  0
    0.8414   -0.8207    0.0000 C   0  0  0  0  0  0           0  0  0
   -0.7828   -1.7621    0.0000 C   0  0  0  0  0  0           0  0  0
   -1.6207   -0.5828    0.0000 C   0  0  0  0  0  0           0  0  0
    0.8000    1.2621    0.0000 C   0  0  0  0  0  0           0  0  0
   -0.8345    1.2621    0.0000 C   0  0  0  0  0  0           0  0  0
    0.8414   -1.7621    0.0000 C   0  0  0  0  0  0           0  0  0
    1.6931   -0.4828    0.0000 C   0  0  0  0  0  0           0  0  0
    0.0310   -2.2345    0.0000 O   0  0  0  0  0  0           0  0  0
   -1.6000   -2.0000    0.0000 N   0  0  0  0  0  0           0  0  0
   -2.1345   -1.3207    0.0000 N   0  0  0  0  0  0           0  0  0
   -1.9690   -0.0138    0.0000 C   0  0  0  0  0  0           0  0  0
    0.8000    2.1862    0.0000 C   0  0  0  0  0  0           0  0  0
    1.4690    0.9379    0.0000 C   0  0  0  0  0  0           0  0  0
   -0.8345    2.1862    0.0000 C   0  0  0  0  0  0           0  0  0
    1.4414   -2.1828    0.0000 N   0  0  0  0  0  0           0  0  0
    2.7172   -0.1379    0.0000 N   0  0  0  0  0  0           0  0  0
   -0.0310    2.6483    0.0000 C   0  0  0  0  0  0           0  0  0
   -0.0483    3.2241    0.0000 C   0  0  0  0  0  0           0  0  0
  1  2  1  0     0  0
  1  3  1  0     0  0
  1  4  1  0     0  0
  2  5  2  0     0  0
  2  6  1  0     0  0
  3  7  1  0     0  0
  3  8  2  0     0  0
  4  9  2  0     0  0
  4 10  1  0     0  0
  5 11  1  0     0  0
  5 12  1  0     0  0
  6 13  2  0     0  0
  6 14  1  0     0  0
  7 15  2  0     0  0
  7 16  1  0     0  0
  8 17  1  0     0  0
  9 18  1  0     0  0
 10 19  3  0     0  0
 15 20  1  0     0  0
 20 21  1  0     0  0
  9 11  1  0     0  0
 12 13  1  0     0  0
 17 20  2  0     0  0
M  END
>  <IDNUMBER>
BAS 00453077

>  <BOX>
2

>  <CELL>
B9

>  <WEIGHT>
10.0

>  <MOL_WEIGHT>
280.33

>  <STRUCT_FORMULA>
C16H16N4O

>  <VENDOR_LOT>
58001

$$$$

          08231011372D 1   1.00000     0.00000     0

 20 21  0     0  0            999 V2000
   -2.9103    0.1966    0.0000 C   0  0  0  0  0  0           0  0  0
   -1.6966    0.9103    0.0000 C   0  0  0  0  0  0           0  0  0
   -4.1172    0.8931    0.0000 C   0  0  0  0  0  0           0  0  0
   -2.9138   -1.2103    0.0000 C   0  0  0  0  0  0           0  0  0
   -0.4793    0.2138    0.0000 C   0  0  0  0  0  0           0  0  0
   -1.7034    2.3103    0.0000 O   0  0  0  0  0  0           0  0  0
   -5.3241    0.2000    0.0000 C   0  0  0  0  0  0           0  0  0
   -4.1241    2.2966    0.0000 O   0  0  0  0  0  0           0  0  0
   -4.1276   -1.9034    0.0000 C   0  0  0  0  0  0           0  0  0
    0.7345    0.9241    0.0000 C   0  0  0  0  0  0           0  0  0
   -5.3345   -1.1966    0.0000 C   0  0  0  0  0  0           0  0  0
    1.9483    0.2241    0.0000 C   0  0  0  0  0  0           0  0  0
    0.7276    2.3276    0.0000 O   0  0  0  0  0  0           0  0  0
    1.9414   -1.1759    0.0000 C   0  0  0  0  0  0           0  0  0
    3.1586    0.9138    0.0000 C   0  0  0  0  0  0           0  0  0
    3.1448   -1.8828    0.0000 C   0  0  0  0  0  0           0  0  0
    4.3621    0.2172    0.0000 C   0  0  0  0  0  0           0  0  0
    4.3621   -1.1897    0.0000 C   0  0  0  0  0  0           0  0  0
    5.5724   -1.8897    0.0000 O   0  0  0  0  0  0           0  0  0
    6.7828   -1.1793    0.0000 C   0  0  0  0  0  0           0  0  0
  1  2  1  0     0  0
  1  3  2  0     0  0
  1  4  1  0     0  0
  2  5  1  0     0  0
  2  6  2  0     0  0
  3  7  1  0     0  0
  3  8  1  0     0  0
  4  9  2  0     0  0
  5 10  1  0     0  0
  7 11  2  0     0  0
 10 12  1  0     0  0
 10 13  2  0     0  0
 12 14  2  0     0  0
 12 15  1  0     0  0
 14 16  1  0     0  0
 15 17  2  0     0  0
 16 18  2  0     0  0
 18 19  1  0     0  0
 19 20  1  0     0  0
  9 11  1  0     0  0
 17 18  1  0     0  0
M  END
>  <IDNUMBER>
BAS 01121979

>  <BOX>
2

>  <CELL>
B10

>  <WEIGHT>
10.0

>  <MOL_WEIGHT>
270.28

>  <STRUCT_FORMULA>
C16H14O4

>  <VENDOR_LOT>
233332

$$$$

          08231011372D 1   1.00000     0.00000     0

 15 16  0     0  0            999 V2000
   -0.6759   -0.2483    0.0000 C   0  0  0  0  0  0           0  0  0
   -0.6759    0.3793    0.0000 C   0  0  0  0  0  0           0  0  0
   -0.0759   -0.4483    0.0000 N   0  0  0  0  0  0           0  0  0
   -1.2379   -0.5724    0.0000 N   0  0  0  0  0  0           0  0  0
   -0.0759    0.5759    0.0000 N   0  0  0  0  0  0           0  0  0
   -1.2379    0.7000    0.0000 C   0  0  0  0  0  0           0  0  0
    0.3000    0.0655    0.0000 C   0  0  0  0  0  0           0  0  0
   -1.7897   -0.2483    0.0000 C   0  0  0  0  0  0           0  0  0
   -1.7897    0.3793    0.0000 N   0  0  0  0  0  0           0  0  0
   -1.2379    1.3414    0.0000 N   0  0  0  0  0  0           0  0  0
    0.9241    0.0655    0.0000 S   0  0  0  0  0  0           0  0  0
    1.2483   -0.5000    0.0000 C   0  0  0  0  0  0           0  0  0
    1.8828   -0.5000    0.0000 C   0  0  0  0  0  0           0  0  0
    2.2241   -1.0345    0.0000 O   0  0  0  0  0  0           0  0  0
    2.2103    0.0414    0.0000 O   0  0  0  0  0  0           0  0  0
  1  2  2  0     0  0
  1  3  1  0     0  0
  1  4  1  0     0  0
  2  5  1  0     0  0
  2  6  1  0     0  0
  3  7  1  0     0  0
  4  8  2  0     0  0
  6  9  2  0     0  0
  6 10  1  0     0  0
  7 11  1  0     0  0
 11 12  1  0     0  0
 12 13  1  0     0  0
 13 14  1  0     0  0
 13 15  2  0     0  0
  5  7  2  0     0  0
  8  9  1  0     0  0
M  END
>  <IDNUMBER>
BAS 00161966

>  <BOX>
2

>  <CELL>
B11

>  <WEIGHT>
10.0

>  <MOL_WEIGHT>
225.23

>  <STRUCT_FORMULA>
C7H7N5O2S

>  <VENDOR_LOT>
364821

$$$$

          08231011372D 1   1.00000     0.00000     0

 20 22  0     0  0            999 V2000
    1.0931    0.9172    0.0000 N   0  0  3  0  0  0           0  0  0
    1.1034   -1.2379    0.0000 C   0  0  3  0  0  0           0  0  0
    0.3586    1.0690    0.0000 C   0  0  0  0  0  0           0  0  0
    1.4586    1.5690    0.0000 C   0  0  0  0  0  0           0  0  0
    0.3931   -0.8069    0.0000 O   0  0  0  0  0  0           0  0  0
    0.8276   -2.0552    0.0000 C   0  0  3  0  0  0           0  0  0
    0.2828    1.8069    0.0000 C   0  0  0  0  0  0           0  0  0
   -0.2414    0.6310    0.0000 N   0  0  0  0  0  0           0  0  0
    0.9586    2.1172    0.0000 N   0  0  0  0  0  0           0  0  0
   -0.3276   -1.2828    0.0000 C   0  0  3  0  0  0           0  0  0
   -0.0448   -2.0552    0.0000 C   0  0  3  0  0  0           0  0  0
    1.2655   -2.6690    0.0000 O   0  0  0  0  0  0           0  0  0
   -0.4034    2.1069    0.0000 C   0  0  0  0  0  0           0  0  0
   -0.9172    0.9241    0.0000 C   0  0  0  0  0  0           0  0  0
   -1.0414   -1.0448    0.0000 C   0  0  0  0  0  0           0  0  0
   -0.4793   -2.6690    0.0000 O   0  0  0  0  0  0           0  0  0
   -1.0034    1.6690    0.0000 N   0  0  0  0  0  0           0  0  0
   -0.4828    2.8552    0.0000 N   0  0  0  0  0  0           0  0  0
   -1.6034   -1.5379    0.0000 O   0  0  0  0  0  0           0  0  0
   -1.1931   -0.3069    0.0000 O   0  0  0  0  0  0           0  0  0
  1  2  1  0     0  0
  1  3  1  0     0  0
  1  4  1  0     0  0
  2  5  1  0     0  0
  2  6  1  0     0  0
  3  7  2  0     0  0
  3  8  1  0     0  0
  4  9  2  0     0  0
  5 10  1  0     0  0
  6 11  1  0     0  0
  6 12  1  0     0  0
  7 13  1  0     0  0
  8 14  2  0     0  0
 10 15  1  0     0  0
 11 16  1  0     0  0
 13 17  2  0     0  0
 13 18  1  0     0  0
 15 19  1  0     0  0
 15 20  2  0     0  0
  7  9  1  0     0  0
 10 11  1  0     0  0
 14 17  1  0     0  0
M  END
>  <IDNUMBER>
BAS 00485791

>  <BOX>
2

>  <CELL>
B12

>  <WEIGHT>
10.0

>  <MOL_WEIGHT>
281.23

>  <STRUCT_FORMULA>
C10H11N5O5

>  <VENDOR_LOT>
155028

$$$$

          08231011372D 1   1.00000     0.00000     0

 16 17  0     0  0            999 V2000
   -0.8310    0.6483    0.0000 C   0  0  0  0  0  0           0  0  0
   -0.8310   -0.3379    0.0000 C   0  0  0  0  0  0           0  0  0
    0.1138    0.9483    0.0000 N   0  0  0  0  0  0           0  0  0
   -1.6828    1.1448    0.0000 C   0  0  0  0  0  0           0  0  0
    0.1138   -0.6517    0.0000 N   0  0  0  0  0  0           0  0  0
   -1.6828   -0.8379    0.0000 N   0  0  0  0  0  0           0  0  0
    0.6793    0.1483    0.0000 C   0  0  0  0  0  0           0  0  0
   -2.5448    0.6483    0.0000 N   0  0  0  0  0  0           0  0  0
   -1.6828    2.1448    0.0000 N   0  0  0  0  0  0           0  0  0
   -2.5448   -0.3379    0.0000 C   0  0  0  0  0  0           0  0  0
    1.6690    0.1483    0.0000 S   0  0  0  0  0  0           0  0  0
   -3.4207   -0.8517    0.0000 N   0  0  0  0  0  0           0  0  0
    2.1690   -0.7034    0.0000 C   0  0  0  0  0  0           0  0  0
    3.1517   -0.7034    0.0000 C   0  0  0  0  0  0           0  0  0
    3.6690   -1.5379    0.0000 O   0  0  0  0  0  0           0  0  0
    3.6621    0.1207    0.0000 O   0  0  0  0  0  0           0  0  0
  1  2  1  0     0  0
  1  3  1  0     0  0
  1  4  2  0     0  0
  2  5  1  0     0  0
  2  6  2  0     0  0
  3  7  2  0     0  0
  4  8  1  0     0  0
  4  9  1  0     0  0
  6 10  1  0     0  0
  7 11  1  0     0  0
 10 12  1  0     0  0
 11 13  1  0     0  0
 13 14  1  0     0  0
 14 15  1  0     0  0
 14 16  2  0     0  0
  5  7  1  0     0  0
  8 10  2  0     0  0
M  END
>  <IDNUMBER>
BAS 00450522

>  <BOX>
2

>  <CELL>
C1

>  <WEIGHT>
10.0

>  <MOL_WEIGHT>
240.25

>  <STRUCT_FORMULA>
C7H8N6O2S

>  <VENDOR_LOT>
237205

$$$$

          08231011372D 1   1.00000     0.00000     0

 20 21  0     0  0            999 V2000
   -0.6862   -0.0690    0.0000 C   0  0  3  0  0  0           0  0  0
   -1.4379    0.3724    0.0000 C   0  0  0  0  0  0           0  0  0
   -0.6862   -0.9379    0.0000 C   0  0  0  0  0  0           0  0  0
    0.0724    0.3517    0.0000 C   0  0  0  0  0  0           0  0  0
   -2.1759   -0.0690    0.0000 C   0  0  0  0  0  0           0  0  0
   -1.4379    1.2207    0.0000 C   0  0  0  0  0  0           0  0  0
   -1.4483   -1.3690    0.0000 C   0  0  0  0  0  0           0  0  0
    0.0724   -1.3690    0.0000 C   0  0  0  0  0  0           0  0  0
    0.8241   -0.0897    0.0000 C   0  0  0  0  0  0           0  0  0
   -2.1862   -0.9379    0.0000 S   0  0  0  0  0  0           0  0  0
   -2.9483    0.3828    0.0000 N   0  0  0  0  0  0           0  0  0
   -1.4379    2.0931    0.0000 N   0  0  0  0  0  0           0  0  0
   -1.4483   -2.2379    0.0000 N   0  0  0  0  0  0           0  0  0
    0.8414   -1.8069    0.0000 N   0  0  0  0  0  0           0  0  0
    1.5828    0.3310    0.0000 C   0  0  3  0  0  0           0  0  0
    2.3310   -0.1172    0.0000 C   0  0  0  0  0  0           0  0  0
    1.6034    1.1931    0.0000 C   0  0  0  0  0  0           0  0  0
    3.0931    0.2931    0.0000 C   0  0  0  0  0  0           0  0  0
    2.3621    1.6103    0.0000 C   0  0  0  0  0  0           0  0  0
    3.1138    1.1621    0.0000 C   0  0  0  0  0  0           0  0  0
  1  2  1  0     0  0
  1  3  1  0     0  0
  1  4  1  0     0  0
  2  5  2  0     0  0
  2  6  1  0     0  0
  3  7  2  0     0  0
  3  8  1  0     0  0
  4  9  1  0     0  0
  5 10  1  0     0  0
  5 11  1  0     0  0
  6 12  3  0     0  0
  7 13  1  0     0  0
  8 14  3  0     0  0
  9 15  1  0     0  0
 15 16  1  0     0  0
 15 17  1  0     0  0
 16 18  1  0     0  0
 17 19  1  0     0  0
 18 20  1  0     0  0
  7 10  1  0     0  0
 19 20  1  0     0  0
M  END
>  <IDNUMBER>
BAS 02072975

>  <BOX>
2

>  <CELL>
C2

>  <WEIGHT>
10.0

>  <MOL_WEIGHT>
288.42

>  <STRUCT_FORMULA>
C15H20N4S

>  <VENDOR_LOT>
230114

$$$$

          08231011372D 1   1.00000     0.00000     0

 19 20  0     0  0            999 V2000
   -0.2414   -0.5241    0.0000 C   0  0  3  0  0  0           0  0  0
    0.6586   -1.0414    0.0000 C   0  0  0  0  0  0           0  0  0
   -0.2414    0.5138    0.0000 C   0  0  0  0  0  0           0  0  0
   -1.1483   -1.0517    0.0000 N   0  0  0  0  0  0           0  0  0
    0.6724   -2.0897    0.0000 C   0  0  0  0  0  0           0  0  0
    1.5759   -0.5034    0.0000 N   0  3  0  0  0  0           0  0  0
   -1.1483    1.0483    0.0000 C   0  0  0  0  0  0           0  0  0
    0.6586    1.0345    0.0000 C   0  0  0  0  0  0           0  0  0
   -1.1483   -2.0897    0.0000 C   0  0  0  0  0  0           0  0  0
   -0.2276   -2.6138    0.0000 N   0  0  0  0  0  0           0  0  0
    1.5897   -2.6414    0.0000 C   0  0  0  0  0  0           0  0  0
    1.5759    0.5586    0.0000 O   0  0  0  0  0  0           0  0  0
    2.4759   -1.0241    0.0000 O   0  5  0  0  0  0           0  0  0
   -1.1483    2.0862    0.0000 C   0  0  0  0  0  0           0  0  0
    0.6724    2.0862    0.0000 C   0  0  0  0  0  0           0  0  0
   -2.0724   -2.6138    0.0000 O   0  0  0  0  0  0           0  0  0
   -0.2276    2.6103    0.0000 C   0  0  0  0  0  0           0  0  0
   -2.0621    2.5966    0.0000 O   0  0  0  0  0  0           0  0  0
   -0.2103    3.6586    0.0000 O   0  0  0  0  0  0           0  0  0
  1  2  1  0     0  0
  1  3  1  0     0  0
  1  4  1  0     0  0
  2  5  2  0     0  0
  2  6  1  0     0  0
  3  7  2  0     0  0
  3  8  1  0     0  0
  4  9  1  0     0  0
  5 10  1  0     0  0
  5 11  1  0     0  0
  6 12  2  0     0  0
  6 13  1  0     0  0
  7 14  1  0     0  0
  8 15  2  0     0  0
  9 16  2  0     0  0
 14 17  2  0     0  0
 14 18  1  0     0  0
 17 19  1  0     0  0
  9 10  1  0     0  0
 15 17  1  0     0  0
M  CHG  2   6   1  13  -1
M  END
>  <IDNUMBER>
BAS 00086987

>  <BOX>
2

>  <CELL>
C3

>  <WEIGHT>
10.0

>  <MOL_WEIGHT>
265.22

>  <STRUCT_FORMULA>
C11H11N3O5

>  <VENDOR_LOT>
48067

$$$$

          08231011372D 1   1.00000     0.00000     0

 22 23  0     0  0            999 V2000
   -1.7517   -1.2241    0.0000 C   0  0  0  0  0  0           0  0  0
   -1.4448   -0.1241    0.0000 N   0  0  3  0  0  0           0  0  0
   -0.9621   -2.0310    0.0000 C   0  0  0  0  0  0           0  0  0
   -2.8517   -1.5103    0.0000 C   0  0  0  0  0  0           0  0  0
   -0.3448    0.1517    0.0000 C   0  0  0  0  0  0           0  0  0
   -2.2207    0.7034    0.0000 C   0  0  0  0  0  0           0  0  0
   -1.2517   -3.0966    0.0000 C   0  0  0  0  0  0           0  0  0
   -3.1621   -2.5931    0.0000 C   0  0  0  0  0  0           0  0  0
   -0.0138    1.2276    0.0000 C   0  0  0  0  0  0           0  0  0
   -3.3207    0.4276    0.0000 C   0  0  0  0  0  0           0  0  0
   -1.9000    1.7759    0.0000 O   0  0  0  0  0  0           0  0  0
   -2.3724   -3.4103    0.0000 C   0  0  0  0  0  0           0  0  0
    1.0862    1.5069    0.0000 N   0  0  3  0  0  0           0  0  0
    1.8793    0.7034    0.0000 C   0  0  0  0  0  0           0  0  0
    1.4000    2.6034    0.0000 C   0  0  0  0  0  0           0  0  0
    2.9793    0.9759    0.0000 C   0  0  0  0  0  0           0  0  0
    1.5655   -0.3931    0.0000 C   0  0  0  0  0  0           0  0  0
    2.5000    2.8759    0.0000 C   0  0  0  0  0  0           0  0  0
    0.6034    3.4172    0.0000 O   0  0  0  0  0  0           0  0  0
    3.7655    0.1690    0.0000 C   0  0  0  0  0  0           0  0  0
    2.3552   -1.2103    0.0000 C   0  0  0  0  0  0           0  0  0
    3.4552   -0.9448    0.0000 C   0  0  0  0  0  0           0  0  0
  1  2  1  0     0  0
  1  3  1  0     0  0
  1  4  2  0     0  0
  2  5  1  0     0  0
  2  6  1  0     0  0
  3  7  2  0     0  0
  4  8  1  0     0  0
  5  9  1  0     0  0
  6 10  1  0     0  0
  6 11  2  0     0  0
  7 12  1  0     0  0
  9 13  1  0     0  0
 13 14  1  0     0  0
 13 15  1  0     0  0
 14 16  2  0     0  0
 14 17  1  0     0  0
 15 18  1  0     0  0
 15 19  2  0     0  0
 16 20  1  0     0  0
 17 21  2  0     0  0
 20 22  2  0     0  0
  8 12  2  0     0  0
 21 22  1  0     0  0
M  END
>  <IDNUMBER>
BAS 00294932

>  <BOX>
2

>  <CELL>
C4

>  <WEIGHT>
10.0

>  <MOL_WEIGHT>
296.37

>  <STRUCT_FORMULA>
C18H20N2O2

>  <VENDOR_LOT>
159164

$$$$

          08231011372D 1   1.00000     0.00000     0

 22 24  0     0  0            999 V2000
   -0.9931    0.0517    0.0000 C   0  0  0  0  0  0           0  0  0
   -0.2414   -0.3793    0.0000 C   0  0  3  0  0  0           0  0  0
   -1.7414   -0.3793    0.0000 C   0  0  0  0  0  0           0  0  0
   -1.1724    0.9000    0.0000 C   0  0  0  0  0  0           0  0  0
    0.4966    0.0414    0.0000 C   0  0  0  0  0  0           0  0  0
   -0.2414   -1.2483    0.0000 C   0  0  0  0  0  0           0  0  0
   -1.7517   -1.2483    0.0000 O   0  0  0  0  0  0           0  0  0
   -2.3931    0.2000    0.0000 N   0  0  0  0  0  0           0  0  0
   -2.0310    1.0000    0.0000 N   0  0  0  0  0  0           0  0  0
   -0.5931    1.5517    0.0000 C   0  0  0  0  0  0           0  0  0
    0.5069    0.9103    0.0000 C   0  0  0  0  0  0           0  0  0
    1.2586   -0.3793    0.0000 C   0  0  0  0  0  0           0  0  0
   -0.9931   -1.6793    0.0000 C   0  0  0  0  0  0           0  0  0
    0.5172   -1.6897    0.0000 C   0  0  0  0  0  0           0  0  0
    0.2483    1.3724    0.0000 C   0  0  0  0  0  0           0  0  0
    1.2586    1.3414    0.0000 C   0  0  0  0  0  0           0  0  0
    2.0069    0.0414    0.0000 C   0  0  0  0  0  0           0  0  0
   -1.0034   -2.5483    0.0000 N   0  0  0  0  0  0           0  0  0
    1.2759   -2.1207    0.0000 N   0  0  0  0  0  0           0  0  0
    0.8172    2.0103    0.0000 C   0  0  0  0  0  0           0  0  0
    2.0069    0.9103    0.0000 C   0  0  0  0  0  0           0  0  0
    2.7690    1.3414    0.0000 O   0  0  0  0  0  0           0  0  0
  1  2  1  0     0  0
  1  3  2  0     0  0
  1  4  1  0     0  0
  2  5  1  0     0  0
  2  6  1  0     0  0
  3  7  1  0     0  0
  3  8  1  0     0  0
  4  9  2  0     0  0
  4 10  1  0     0  0
  5 11  1  0     0  0
  5 12  2  0     0  0
  6 13  2  0     0  0
  6 14  1  0     0  0
 10 15  1  0     0  0
 11 16  2  0     0  0
 12 17  1  0     0  0
 13 18  1  0     0  0
 14 19  3  0     0  0
 15 20  1  0     0  0
 16 21  1  0     0  0
 21 22  1  0     0  0
  7 13  1  0     0  0
  8  9  1  0     0  0
 17 21  2  0     0  0
M  END
>  <IDNUMBER>
BAS 02230836

>  <BOX>
2

>  <CELL>
C5

>  <WEIGHT>
10.0

>  <MOL_WEIGHT>
296.33

>  <STRUCT_FORMULA>
C16H16N4O2

>  <VENDOR_LOT>
252269

$$$$

          08231011372D 1   1.00000     0.00000     0

 20 22  0     0  0            999 V2000
   -1.2828   -1.1310    0.0000 C   0  0  0  0  0  0           0  0  0
   -1.1345   -0.3621    0.0000 C   0  0  0  0  0  0           0  0  0
   -2.0724   -1.2310    0.0000 C   0  0  0  0  0  0           0  0  0
   -0.8207   -1.7621    0.0000 C   0  0  0  0  0  0           0  0  0
   -1.8000    0.0276    0.0000 C   0  0  0  0  0  0           0  0  0
   -0.4379    0.0172    0.0000 C   0  0  0  0  0  0           0  0  0
   -2.3828   -0.5000    0.0000 N   0  0  0  0  0  0           0  0  0
   -2.3828   -1.9448    0.0000 C   0  0  0  0  0  0           0  0  0
   -1.1345   -2.4621    0.0000 C   0  0  0  0  0  0           0  0  0
   -0.4379    0.8069    0.0000 C   0  0  0  0  0  0           0  0  0
   -1.8897   -2.5621    0.0000 C   0  0  0  0  0  0           0  0  0
    0.2276    1.2000    0.0000 N   0  0  0  0  0  0           0  0  0
    0.9483    1.6069    0.0000 C   0  0  0  0  0  0           0  0  0
    1.5621    1.3172    0.0000 C   0  0  0  0  0  0           0  0  0
    0.9000    2.6172    0.0000 O   0  0  0  0  0  0           0  0  0
    2.2414    1.7517    0.0000 C   0  0  0  0  0  0           0  0  0
    1.6000    0.5069    0.0000 C   0  0  0  0  0  0           0  0  0
    2.9655    1.3897    0.0000 C   0  0  0  0  0  0           0  0  0
    2.3172    0.1517    0.0000 N   0  0  0  0  0  0           0  0  0
    3.0103    0.5690    0.0000 C   0  0  0  0  0  0           0  0  0
  1  2  1  0     0  0
  1  3  2  0     0  0
  1  4  1  0     0  0
  2  5  2  0     0  0
  2  6  1  0     0  0
  3  7  1  0     0  0
  3  8  1  0     0  0
  4  9  2  0     0  0
  6 10  1  0     0  0
  8 11  2  0     0  0
 10 12  1  0     0  0
 12 13  1  0     0  0
 13 14  1  0     0  0
 13 15  2  0     0  0
 14 16  2  0     0  0
 14 17  1  0     0  0
 16 18  1  0     0  0
 17 19  2  0     0  0
 18 20  2  0     0  0
  5  7  1  0     0  0
  9 11  1  0     0  0
 19 20  1  0     0  0
M  END
>  <IDNUMBER>
BAS 03049811

>  <SALTDATA>
(COOH)2

>  <BOX>
2

>  <CELL>
C6

>  <WEIGHT>
10.0

>  <MOL_WEIGHT>
265.31

>  <STRUCT_FORMULA>
C16H15N3O

>  <VENDOR_LOT>
278637

$$$$

          08231011372D 1   1.00000     0.00000     0

 19 20  0     0  0            999 V2000
    1.0483    1.2586    0.0000 C   0  0  0  0  0  0           0  0  0
    0.2931    1.6966    0.0000 C   0  0  0  0  0  0           0  0  0
    1.0483    0.3759    0.0000 C   0  0  0  0  0  0           0  0  0
    1.8310    1.7207    0.0000 C   0  0  0  0  0  0           0  0  0
   -0.4897    1.2586    0.0000 N   0  0  0  0  0  0           0  0  0
    0.2931    2.5966    0.0000 O   0  0  0  0  0  0           0  0  0
    1.8310   -0.0690    0.0000 C   0  0  0  0  0  0           0  0  0
    0.2828   -0.0552    0.0000 Cl  0  0  0  0  0  0           0  0  0
    2.5931    1.2828    0.0000 C   0  0  0  0  0  0           0  0  0
   -0.4897    0.3759    0.0000 N   0  0  0  0  0  0           0  0  0
    2.5931    0.3759    0.0000 C   0  0  0  0  0  0           0  0  0
   -1.2690   -0.0690    0.0000 C   0  0  0  0  0  0           0  0  0
   -1.2690   -0.9690    0.0000 C   0  0  0  0  0  0           0  0  0
   -2.0276    0.3759    0.0000 O   0  0  0  0  0  0           0  0  0
   -0.4897   -1.4034    0.0000 C   0  0  0  0  0  0           0  0  0
   -2.0276   -1.4034    0.0000 C   0  0  0  0  0  0           0  0  0
   -0.4897   -2.2897    0.0000 C   0  0  0  0  0  0           0  0  0
   -2.0276   -2.3034    0.0000 C   0  0  0  0  0  0           0  0  0
   -1.2517   -2.7414    0.0000 N   0  0  0  0  0  0           0  0  0
  1  2  1  0     0  0
  1  3  2  0     0  0
  1  4  1  0     0  0
  2  5  1  0     0  0
  2  6  2  0     0  0
  3  7  1  0     0  0
  3  8  1  0     0  0
  4  9  2  0     0  0
  5 10  1  0     0  0
  7 11  2  0     0  0
 10 12  1  0     0  0
 12 13  1  0     0  0
 12 14  2  0     0  0
 13 15  1  0     0  0
 13 16  2  0     0  0
 15 17  2  0     0  0
 16 18  1  0     0  0
 17 19  1  0     0  0
  9 11  1  0     0  0
 18 19  2  0     0  0
M  END
>  <IDNUMBER>
BAS 00873769

>  <BOX>
2

>  <CELL>
C7

>  <WEIGHT>
10.0

>  <MOL_WEIGHT>
275.69

>  <STRUCT_FORMULA>
C13H10ClN3O2

>  <VENDOR_LOT>
65099

$$$$

          08231011372D 1   1.00000     0.00000     0

 20 21  0     0  0            999 V2000
    0.2966    0.2690    0.0000 C   0  0  3  0  0  0           0  0  0
    0.9862   -0.1828    0.0000 N   0  0  3  0  0  0           0  0  0
    0.5103    1.0655    0.0000 C   0  0  0  0  0  0           0  0  0
   -0.4138   -0.1345    0.0000 C   0  0  0  0  0  0           0  0  0
    1.6310    0.3310    0.0000 C   0  0  0  0  0  0           0  0  0
    1.0241   -1.0103    0.0000 C   0  0  0  0  0  0           0  0  0
    1.3345    1.1034    0.0000 C   0  0  0  0  0  0           0  0  0
   -0.2034    1.4793    0.0000 C   0  0  0  0  0  0           0  0  0
   -0.4276   -0.9586    0.0000 C   0  0  0  0  0  0           0  0  0
   -1.1276    0.2828    0.0000 C   0  0  0  0  0  0           0  0  0
    2.4241    0.1172    0.0000 O   0  0  0  0  0  0           0  0  0
    0.3345   -1.4552    0.0000 C   0  0  0  0  0  0           0  0  0
    1.7862    1.7966    0.0000 O   0  0  0  0  0  0           0  0  0
   -0.2069    2.3034    0.0000 C   0  0  0  0  0  0           0  0  0
   -0.9172    1.0655    0.0000 O   0  0  0  0  0  0           0  0  0
   -1.1379   -1.3690    0.0000 C   0  0  0  0  0  0           0  0  0
   -1.8448   -0.1207    0.0000 C   0  0  0  0  0  0           0  0  0
    0.3724   -2.2793    0.0000 O   0  0  0  0  0  0           0  0  0
   -1.8517   -0.9483    0.0000 C   0  0  0  0  0  0           0  0  0
   -2.5690   -1.3552    0.0000 Cl  0  0  0  0  0  0           0  0  0
  1  2  1  0     0  0
  1  3  1  0     0  0
  1  4  1  0     0  0
  2  5  1  0     0  0
  2  6  1  0     0  0
  3  7  2  0     0  0
  3  8  1  0     0  0
  4  9  1  0     0  0
  4 10  2  0     0  0
  5 11  2  0     0  0
  6 12  1  0     0  0
  7 13  1  0     0  0
  8 14  1  0     0  0
  8 15  2  0     0  0
  9 16  2  0     0  0
 10 17  1  0     0  0
 12 18  1  0     0  0
 16 19  1  0     0  0
 19 20  1  0     0  0
  5  7  1  0     0  0
 17 19  2  0     0  0
M  END
>  <IDNUMBER>
BAS 00732855

>  <BOX>
2

>  <CELL>
C8

>  <WEIGHT>
10.0

>  <MOL_WEIGHT>
295.72

>  <STRUCT_FORMULA>
C14H14ClNO4

>  <VENDOR_LOT>
94186

$$$$

          08231011372D 1   1.00000     0.00000     0

 18 19  0     0  0            999 V2000
   -0.0069   -0.1241    0.0000 C   0  0  3  0  0  0           0  0  0
    0.6552   -0.5069    0.0000 C   0  0  0  0  0  0           0  0  0
   -0.6621   -0.5069    0.0000 C   0  0  0  0  0  0           0  0  0
    0.0172    0.6414    0.0000 C   0  0  3  0  0  0           0  0  0
    0.6552   -1.2862    0.0000 C   0  0  0  0  0  0           0  0  0
    1.3172   -0.1069    0.0000 C   0  0  0  0  0  0           0  0  0
   -0.6621   -1.2862    0.0000 C   0  0  0  0  0  0           0  0  0
   -1.3241   -0.1241    0.0000 C   0  0  0  0  0  0           0  0  0
   -0.6448    1.0138    0.0000 C   0  0  0  0  0  0           0  0  0
    0.6759    1.0138    0.0000 C   0  0  0  0  0  0           0  0  0
   -0.0069   -1.6586    0.0000 S   0  0  0  0  0  0           0  0  0
    1.3172   -1.6862    0.0000 N   0  0  0  0  0  0           0  0  0
    1.9759    0.2759    0.0000 N   0  0  0  0  0  0           0  0  0
   -1.3448   -1.6586    0.0000 N   0  0  0  0  0  0           0  0  0
   -2.0069    0.2759    0.0000 N   0  0  0  0  0  0           0  0  0
   -0.6448    1.7759    0.0000 C   0  0  0  0  0  0           0  0  0
    0.6759    1.7759    0.0000 C   0  0  0  0  0  0           0  0  0
    0.0172    2.1552    0.0000 C   0  0  0  0  0  0           0  0  0
  1  2  1  0     0  0
  1  3  1  0     0  0
  1  4  1  0     0  0
  2  5  2  0     0  0
  2  6  1  0     0  0
  3  7  2  0     0  0
  3  8  1  0     0  0
  4  9  1  0     0  0
  4 10  1  0     0  0
  5 11  1  0     0  0
  5 12  1  0     0  0
  6 13  3  0     0  0
  7 14  1  0     0  0
  8 15  3  0     0  0
  9 16  1  0     0  0
 10 17  1  0     0  0
 16 18  1  0     0  0
  7 11  1  0     0  0
 17 18  1  0     0  0
M  END
>  <IDNUMBER>
BAS 00862414

>  <BOX>
2

>  <CELL>
C9

>  <WEIGHT>
10.0

>  <MOL_WEIGHT>
260.36

>  <STRUCT_FORMULA>
C13H16N4S

>  <VENDOR_LOT>
178244

$$$$

          08231011372D 1   1.00000     0.00000     0

 16 17  0     0  0            999 V2000
   -0.0690    0.2276    0.0000 C   0  0  0  0  0  0           0  0  0
   -0.0690   -0.4517    0.0000 C   0  0  0  0  0  0           0  0  0
    0.5897    0.4483    0.0000 N   0  0  3  0  0  0           0  0  0
   -0.6379    0.5793    0.0000 C   0  0  0  0  0  0           0  0  0
    0.5897   -0.6414    0.0000 N   0  0  0  0  0  0           0  0  0
   -0.6379   -0.7931    0.0000 N   0  0  3  0  0  0           0  0  0
    0.9897   -0.1000    0.0000 C   0  0  0  0  0  0           0  0  0
    0.8310    1.1000    0.0000 C   0  0  0  0  0  0           0  0  0
   -1.2517    0.2276    0.0000 N   0  0  0  0  0  0           0  0  0
   -0.6379    1.2655    0.0000 O   0  0  0  0  0  0           0  0  0
   -1.2517   -0.4517    0.0000 C   0  0  0  0  0  0           0  0  0
   -0.6379   -1.4724    0.0000 C   0  0  0  0  0  0           0  0  0
    1.6690   -0.0931    0.0000 S   0  0  0  0  0  0           0  0  0
    0.3690    1.6172    0.0000 C   0  0  0  0  0  0           0  0  0
   -1.8483   -0.7931    0.0000 O   0  0  0  0  0  0           0  0  0
    2.0034   -0.6828    0.0000 C   0  0  0  0  0  0           0  0  0
  1  2  2  0     0  0
  1  3  1  0     0  0
  1  4  1  0     0  0
  2  5  1  0     0  0
  2  6  1  0     0  0
  3  7  1  0     0  0
  3  8  1  0     0  0
  4  9  1  0     0  0
  4 10  2  0     0  0
  6 11  1  0     0  0
  6 12  1  0     0  0
  7 13  1  0     0  0
  8 14  1  0     0  0
 11 15  2  0     0  0
 13 16  1  0     0  0
  5  7  2  0     0  0
  9 11  1  0     0  0
M  END
>  <IDNUMBER>
BAS 00843995

>  <BOX>
2

>  <CELL>
C10

>  <WEIGHT>
10.0

>  <MOL_WEIGHT>
240.29

>  <STRUCT_FORMULA>
C9H12N4O2S

>  <VENDOR_LOT>
139391

$$$$

          08231011372D 1   1.00000     0.00000     0

 21 23  0     0  0            999 V2000
   -0.1793   -0.3345    0.0000 C   0  0  3  0  0  0           0  0  0
   -1.0414   -0.3448    0.0000 C   0  0  0  0  0  0           0  0  0
    0.2586    0.4138    0.0000 C   0  0  0  0  0  0           0  0  0
    0.2483   -1.0862    0.0000 C   0  0  0  0  0  0           0  0  0
   -1.4690   -1.0966    0.0000 C   0  0  0  0  0  0           0  0  0
   -1.6310    0.3034    0.0000 C   0  0  0  0  0  0           0  0  0
    1.1207    0.4138    0.0000 C   0  0  0  0  0  0           0  0  0
   -0.1690    1.1655    0.0000 C   0  0  0  0  0  0           0  0  0
   -0.1793   -1.8448    0.0000 C   0  0  0  0  0  0           0  0  0
    1.1207   -1.0862    0.0000 C   0  0  0  0  0  0           0  0  0
   -1.0414   -1.8448    0.0000 O   0  0  0  0  0  0           0  0  0
   -2.3310   -0.9138    0.0000 N   0  0  0  0  0  0           0  0  0
   -2.4207   -0.0552    0.0000 N   0  0  0  0  0  0           0  0  0
   -1.4517    1.1552    0.0000 C   0  0  0  0  0  0           0  0  0
    1.5586    1.1655    0.0000 C   0  0  0  0  0  0           0  0  0
    0.2586    1.9138    0.0000 C   0  0  0  0  0  0           0  0  0
    0.2586   -2.6069    0.0000 N   0  0  0  0  0  0           0  0  0
    1.9897   -1.0759    0.0000 N   0  0  0  0  0  0           0  0  0
    1.1207    1.9138    0.0000 C   0  0  0  0  0  0           0  0  0
    2.4310    1.1655    0.0000 O   0  0  0  0  0  0           0  0  0
    1.5414    2.6759    0.0000 O   0  0  0  0  0  0           0  0  0
  1  2  1  0     0  0
  1  3  1  0     0  0
  1  4  1  0     0  0
  2  5  2  0     0  0
  2  6  1  0     0  0
  3  7  1  0     0  0
  3  8  2  0     0  0
  4  9  2  0     0  0
  4 10  1  0     0  0
  5 11  1  0     0  0
  5 12  1  0     0  0
  6 13  2  0     0  0
  6 14  1  0     0  0
  7 15  2  0     0  0
  8 16  1  0     0  0
  9 17  1  0     0  0
 10 18  3  0     0  0
 15 19  1  0     0  0
 15 20  1  0     0  0
 19 21  1  0     0  0
  9 11  1  0     0  0
 12 13  1  0     0  0
 16 19  2  0     0  0
M  END
>  <IDNUMBER>
BAS 02072985

>  <BOX>
2

>  <CELL>
C11

>  <WEIGHT>
10.0

>  <MOL_WEIGHT>
284.27

>  <STRUCT_FORMULA>
C14H12N4O3

>  <VENDOR_LOT>
230120

$$$$

          08231011372D 1   1.00000     0.00000     0

 15 16  0     0  0            999 V2000
   -0.2069    0.0862    0.0000 C   0  0  0  0  0  0           0  0  0
   -0.9207   -0.3345    0.0000 N   0  0  3  0  0  0           0  0  0
    0.5414   -0.2759    0.0000 S   0  0  0  0  0  0           0  0  0
   -0.0931    0.9034    0.0000 N   0  0  0  0  0  0           0  0  0
   -1.6310    0.0724    0.0000 C   0  0  0  0  0  0           0  0  0
   -0.9103   -1.1586    0.0000 C   0  0  0  0  0  0           0  0  0
    1.1069    0.3276    0.0000 C   0  0  0  0  0  0           0  0  0
    0.7172    1.0483    0.0000 C   0  0  0  0  0  0           0  0  0
   -2.3448   -0.3379    0.0000 C   0  0  0  0  0  0           0  0  0
   -1.6207   -1.5759    0.0000 C   0  0  0  0  0  0           0  0  0
    1.9310    0.2345    0.0000 C   0  0  0  0  0  0           0  0  0
    1.0931    1.7897    0.0000 C   0  0  0  0  0  0           0  0  0
   -2.3448   -1.1655    0.0000 O   0  0  0  0  0  0           0  0  0
    2.2690   -0.5138    0.0000 O   0  0  0  0  0  0           0  0  0
    2.4172    0.9034    0.0000 O   0  0  0  0  0  0           0  0  0
  1  2  1  0     0  0
  1  3  1  0     0  0
  1  4  2  0     0  0
  2  5  1  0     0  0
  2  6  1  0     0  0
  3  7  1  0     0  0
  4  8  1  0     0  0
  5  9  1  0     0  0
  6 10  1  0     0  0
  7 11  1  0     0  0
  8 12  1  0     0  0
  9 13  1  0     0  0
 11 14  1  0     0  0
 11 15  2  0     0  0
  7  8  2  0     0  0
 10 13  1  0     0  0
M  END
>  <IDNUMBER>
BAS 10151194

>  <BOX>
2

>  <CELL>
C12

>  <WEIGHT>
10.0

>  <MOL_WEIGHT>
228.27

>  <STRUCT_FORMULA>
C9H12N2O3S

>  <VENDOR_LOT>
1150779

$$$$

          08231011372D 1   1.00000     0.00000     0

 21 22  0     0  0            999 V2000
   -0.7966   -0.5345    0.0000 C   0  0  0  0  0  0           0  0  0
   -0.1069   -0.9345    0.0000 C   0  0  0  0  0  0           0  0  0
   -1.4862   -0.9345    0.0000 C   0  0  0  0  0  0           0  0  0
   -0.7966    0.2655    0.0000 C   0  0  0  0  0  0           0  0  0
   -0.1069   -1.7483    0.0000 C   0  0  0  0  0  0           0  0  0
   -1.4862   -1.7483    0.0000 C   0  0  0  0  0  0           0  0  0
   -0.1207    0.6655    0.0000 N   0  0  0  0  0  0           0  0  0
   -0.7966   -2.1483    0.0000 C   0  0  0  0  0  0           0  0  0
    0.5931   -2.1483    0.0000 O   0  0  0  0  0  0           0  0  0
   -2.1862   -2.1483    0.0000 O   0  0  0  0  0  0           0  0  0
   -0.1207    1.4655    0.0000 N   0  0  0  0  0  0           0  0  0
   -0.7966   -2.9483    0.0000 O   0  0  0  0  0  0           0  0  0
    1.2793   -1.7586    0.0000 C   0  0  0  0  0  0           0  0  0
   -2.1862   -2.9483    0.0000 C   0  0  0  0  0  0           0  0  0
    0.6034    1.8828    0.0000 C   0  0  0  0  0  0           0  0  0
    0.6034    2.6897    0.0000 N   0  0  0  0  0  0           0  0  0
    1.3034    1.4828    0.0000 N   0  0  0  0  0  0           0  0  0
    1.3034    3.0897    0.0000 C   0  0  0  0  0  0           0  0  0
    2.0034    1.8828    0.0000 N   0  0  0  0  0  0           0  0  0
    2.0034    2.6897    0.0000 C   0  0  0  0  0  0           0  0  0
    1.3034    3.8897    0.0000 O   0  0  0  0  0  0           0  0  0
  1  2  1  0     0  0
  1  3  2  0     0  0
  1  4  1  0     0  0
  2  5  2  0     0  0
  3  6  1  0     0  0
  4  7  2  0     0  0
  5  8  1  0     0  0
  5  9  1  0     0  0
  6 10  1  0     0  0
  7 11  1  0     0  0
  8 12  1  0     0  0
  9 13  1  0     0  0
 10 14  1  0     0  0
 11 15  1  0     0  0
 15 16  1  0     0  0
 15 17  2  0     0  0
 16 18  1  0     0  0
 17 19  1  0     0  0
 18 20  1  0     0  0
 18 21  2  0     0  0
  6  8  2  0     0  0
 19 20  2  0     0  0
M  END
>  <IDNUMBER>
BAS 00582817

>  <BOX>
2

>  <CELL>
D1

>  <WEIGHT>
10.0

>  <MOL_WEIGHT>
291.27

>  <STRUCT_FORMULA>
C12H13N5O4

>  <VENDOR_LOT>
180040

$$$$

          08231011372D 1   1.00000     0.00000     0

 22 24  0     0  0            999 V2000
   -0.5448    0.0621    0.0000 C   0  0  3  0  0  0           0  0  0
   -0.9069   -0.5759    0.0000 C   0  0  0  0  0  0           0  0  0
   -0.9586    0.6966    0.0000 N   0  0  3  0  0  0           0  0  0
    0.2138    0.0621    0.0000 C   0  0  0  0  0  0           0  0  0
   -0.5241   -1.2379    0.0000 C   0  0  0  0  0  0           0  0  0
   -1.6690   -0.5759    0.0000 C   0  0  0  0  0  0           0  0  0
   -0.6207    1.3966    0.0000 C   0  0  0  0  0  0           0  0  0
   -1.7207    0.6966    0.0000 C   0  0  0  0  0  0           0  0  0
    0.9759    0.0621    0.0000 C   0  0  0  0  0  0           0  0  0
   -0.9069   -1.8862    0.0000 C   0  0  0  0  0  0           0  0  0
    0.2276   -1.2379    0.0000 O   0  0  0  0  0  0           0  0  0
   -2.0690   -1.2379    0.0000 C   0  0  0  0  0  0           0  0  0
   -0.9931    1.9828    0.0000 C   0  0  0  0  0  0           0  0  0
   -2.0931    1.3069    0.0000 C   0  0  0  0  0  0           0  0  0
    1.7310    0.0621    0.0000 C   0  0  0  0  0  0           0  0  0
   -1.6690   -1.8862    0.0000 C   0  0  0  0  0  0           0  0  0
   -1.7586    1.9828    0.0000 O   0  0  0  0  0  0           0  0  0
    2.1276    0.7241    0.0000 C   0  0  0  0  0  0           0  0  0
    2.1276   -0.5931    0.0000 C   0  0  0  0  0  0           0  0  0
    2.8793    0.7241    0.0000 C   0  0  0  0  0  0           0  0  0
    2.8793   -0.5931    0.0000 C   0  0  0  0  0  0           0  0  0
    3.2759    0.0621    0.0000 C   0  0  0  0  0  0           0  0  0
  1  2  1  0     0  0
  1  3  1  0     0  0
  1  4  1  0     0  0
  2  5  2  0     0  0
  2  6  1  0     0  0
  3  7  1  0     0  0
  3  8  1  0     0  0
  4  9  3  0     0  0
  5 10  1  0     0  0
  5 11  1  0     0  0
  6 12  2  0     0  0
  7 13  1  0     0  0
  8 14  1  0     0  0
  9 15  1  0     0  0
 10 16  2  0     0  0
 13 17  1  0     0  0
 15 18  1  0     0  0
 15 19  2  0     0  0
 18 20  2  0     0  0
 19 21  1  0     0  0
 20 22  1  0     0  0
 12 16  1  0     0  0
 14 17  1  0     0  0
 21 22  2  0     0  0
M  END
>  <IDNUMBER>
BAS 02325558

>  <BOX>
2

>  <CELL>
D2

>  <WEIGHT>
10.0

>  <MOL_WEIGHT>
293.36

>  <STRUCT_FORMULA>
C19H19NO2

>  <VENDOR_LOT>
247913

$$$$

          08231011372D 1   1.00000     0.00000     0

 17 18  0     0  0            999 V2000
   -1.3448   -0.3448    0.0000 C   0  0  0  0  0  0           0  0  0
   -1.3414    0.4897    0.0000 C   0  0  0  0  0  0           0  0  0
   -0.6345   -0.7586    0.0000 N   0  0  0  0  0  0           0  0  0
   -2.0621   -0.7552    0.0000 C   0  0  0  0  0  0           0  0  0
   -0.6241    0.9034    0.0000 C   0  0  0  0  0  0           0  0  0
   -2.0621    0.9000    0.0000 C   0  0  0  0  0  0           0  0  0
    0.0897   -0.3483    0.0000 C   0  0  0  0  0  0           0  0  0
   -2.7759   -0.3448    0.0000 C   0  0  0  0  0  0           0  0  0
    0.0897    0.4828    0.0000 N   0  0  0  0  0  0           0  0  0
   -0.6241    1.7276    0.0000 O   0  0  0  0  0  0           0  0  0
   -2.7759    0.4828    0.0000 C   0  0  0  0  0  0           0  0  0
    0.8034   -0.7655    0.0000 S   0  0  0  0  0  0           0  0  0
    1.5103   -0.3483    0.0000 C   0  0  0  0  0  0           0  0  0
    2.2345   -0.7517    0.0000 C   0  0  0  0  0  0           0  0  0
    2.9379   -0.3310    0.0000 C   0  0  0  0  0  0           0  0  0
    3.6586   -0.7310    0.0000 O   0  0  0  0  0  0           0  0  0
    2.9241    0.4931    0.0000 O   0  0  0  0  0  0           0  0  0
  1  2  1  0     0  0
  1  3  1  0     0  0
  1  4  2  0     0  0
  2  5  1  0     0  0
  2  6  2  0     0  0
  3  7  1  0     0  0
  4  8  1  0     0  0
  5  9  1  0     0  0
  5 10  2  0     0  0
  6 11  1  0     0  0
  7 12  1  0     0  0
 12 13  1  0     0  0
 13 14  1  0     0  0
 14 15  1  0     0  0
 15 16  1  0     0  0
 15 17  2  0     0  0
  7  9  2  0     0  0
  8 11  2  0     0  0
M  END
>  <IDNUMBER>
BAS 02714405

>  <BOX>
2

>  <CELL>
D3

>  <WEIGHT>
10.0

>  <MOL_WEIGHT>
250.28

>  <STRUCT_FORMULA>
C11H10N2O3S

>  <VENDOR_LOT>
331724

$$$$

          08231011372D 1   1.00000     0.00000     0

 22 24  0     0  0            999 V2000
   -0.6345   -2.1862    0.0000 C   0  0  0  0  0  0           0  0  0
    0.2138   -1.9345    0.0000 C   0  0  0  0  0  0           0  0  0
   -0.6345   -3.0862    0.0000 C   0  0  0  0  0  0           0  0  0
   -1.3862   -1.7517    0.0000 C   0  0  0  0  0  0           0  0  0
    0.7310   -2.6517    0.0000 C   0  0  0  0  0  0           0  0  0
    0.5138   -1.0724    0.0000 C   0  0  0  0  0  0           0  0  0
    0.2138   -3.3517    0.0000 N   0  0  0  0  0  0           0  0  0
   -1.3862   -3.5345    0.0000 C   0  0  0  0  0  0           0  0  0
   -2.1690   -2.2138    0.0000 C   0  0  0  0  0  0           0  0  0
   -0.0862   -0.4138    0.0000 N   0  0  0  0  0  0           0  0  0
   -2.1690   -3.0724    0.0000 C   0  0  0  0  0  0           0  0  0
    0.2138    0.4483    0.0000 C   0  0  0  0  0  0           0  0  0
   -0.3690    1.1138    0.0000 C   0  0  0  0  0  0           0  0  0
    1.0655    0.6138    0.0000 C   0  0  0  0  0  0           0  0  0
   -0.0690    1.9483    0.0000 C   0  0  0  0  0  0           0  0  0
    1.3655    1.4483    0.0000 C   0  0  0  0  0  0           0  0  0
    0.7655    2.1138    0.0000 C   0  0  0  0  0  0           0  0  0
    1.0655    2.9483    0.0000 N   0  0  3  0  0  0           0  0  0
    0.4655    3.6138    0.0000 C   0  0  0  0  0  0           0  0  0
    1.9310    3.1276    0.0000 C   0  0  0  0  0  0           0  0  0
   -0.3862    3.4379    0.0000 C   0  0  0  0  0  0           0  0  0
    0.7517    4.4448    0.0000 O   0  0  0  0  0  0           0  0  0
  1  2  1  0     0  0
  1  3  2  0     0  0
  1  4  1  0     0  0
  2  5  2  0     0  0
  2  6  1  0     0  0
  3  7  1  0     0  0
  3  8  1  0     0  0
  4  9  2  0     0  0
  6 10  2  0     0  0
  8 11  2  0     0  0
 10 12  1  0     0  0
 12 13  2  0     0  0
 12 14  1  0     0  0
 13 15  1  0     0  0
 14 16  2  0     0  0
 15 17  2  0     0  0
 17 18  1  0     0  0
 18 19  1  0     0  0
 18 20  1  0     0  0
 19 21  1  0     0  0
 19 22  2  0     0  0
  5  7  1  0     0  0
  9 11  1  0     0  0
 16 17  1  0     0  0
M  END
>  <IDNUMBER>
BAS 00484931

>  <BOX>
2

>  <CELL>
D4

>  <WEIGHT>
10.0

>  <MOL_WEIGHT>
291.35

>  <STRUCT_FORMULA>
C18H17N3O

>  <VENDOR_LOT>
122274

$$$$

          08231011372D 1   1.00000     0.00000     0

 18 19  0     0  0            999 V2000
   -0.3207    0.1690    0.0000 C   0  0  0  0  0  0           0  0  0
   -0.3207   -0.6069    0.0000 C   0  0  0  0  0  0           0  0  0
    1.0310    0.1621    0.0000 N   0  0  3  0  0  0           0  0  0
   -1.0034    0.5621    0.0000 C   0  0  0  0  0  0           0  0  0
    0.3448   -0.9966    0.0000 N   0  0  0  0  0  0           0  0  0
   -1.0034   -0.9966    0.0000 N   0  0  3  0  0  0           0  0  0
    1.0172   -0.6241    0.0000 C   0  0  0  0  0  0           0  0  0
    1.4345    0.8724    0.0000 C   0  0  0  0  0  0           0  0  0
   -1.6690    0.1690    0.0000 N   0  0  0  0  0  0           0  0  0
   -1.0034    1.3483    0.0000 O   0  0  0  0  0  0           0  0  0
   -1.6690   -0.6138    0.0000 C   0  0  0  0  0  0           0  0  0
   -1.0034   -1.7828    0.0000 C   0  0  0  0  0  0           0  0  0
    1.5586   -1.1655    0.0000 N   0  0  0  0  0  0           0  0  0
    1.0207    1.5862    0.0000 C   0  0  0  0  0  0           0  0  0
   -2.3448   -0.9966    0.0000 O   0  0  0  0  0  0           0  0  0
    2.3034   -0.9690    0.0000 N   0  0  0  0  0  0           0  0  0
    1.4345    2.2966    0.0000 C   0  0  0  0  0  0           0  0  0
    0.1966    1.5862    0.0000 C   0  0  0  0  0  0           0  0  0
  1  2  2  0     0  0
  1  3  1  0     0  0
  1  4  1  0     0  0
  2  5  1  0     0  0
  2  6  1  0     0  0
  3  7  1  0     0  0
  3  8  1  0     0  0
  4  9  1  0     0  0
  4 10  2  0     0  0
  6 11  1  0     0  0
  6 12  1  0     0  0
  7 13  1  0     0  0
  8 14  1  0     0  0
 11 15  2  0     0  0
 13 16  1  0     0  0
 14 17  1  0     0  0
 14 18  2  0     0  0
  5  7  2  0     0  0
  9 11  1  0     0  0
M  END
>  <IDNUMBER>
BAS 01108711

>  <BOX>
2

>  <CELL>
D5

>  <WEIGHT>
10.0

>  <MOL_WEIGHT>
250.26

>  <STRUCT_FORMULA>
C10H14N6O2

>  <VENDOR_LOT>
270953

$$$$

          08231011372D 1   1.00000     0.00000     0

 21 22  0     0  0            999 V2000
    1.5483   -0.7310    0.0000 C   0  0  0  0  0  0           0  0  0
    1.8552   -1.6793    0.0000 C   0  0  0  0  0  0           0  0  0
    0.5690   -0.5172    0.0000 N   0  0  0  0  0  0           0  0  0
    2.2483    0.0207    0.0000 C   0  0  0  0  0  0           0  0  0
    2.8207   -1.9172    0.0000 C   0  0  0  0  0  0           0  0  0
    1.1724   -2.4103    0.0000 C   0  0  0  0  0  0           0  0  0
    0.2552    0.4310    0.0000 C   0  0  0  0  0  0           0  0  0
    3.2172   -0.2310    0.0000 C   0  0  0  0  0  0           0  0  0
    3.5034   -1.1793    0.0000 C   0  0  0  0  0  0           0  0  0
    0.1724   -2.2310    0.0000 O   0  0  0  0  0  0           0  0  0
    1.4552   -3.3690    0.0000 O   0  0  0  0  0  0           0  0  0
   -0.7276    0.6414    0.0000 C   0  0  0  0  0  0           0  0  0
    0.9034    1.1690    0.0000 O   0  0  0  0  0  0           0  0  0
   -1.0517    1.5655    0.0000 C   0  0  0  0  0  0           0  0  0
   -1.5310    0.0517    0.0000 O   0  0  0  0  0  0           0  0  0
   -2.0517    1.5655    0.0000 C   0  0  0  0  0  0           0  0  0
   -2.3448    0.6207    0.0000 C   0  0  0  0  0  0           0  0  0
   -2.6828    2.3517    0.0000 C   0  0  0  0  0  0           0  0  0
   -3.3483    0.3310    0.0000 C   0  0  0  0  0  0           0  0  0
   -3.6966    2.2345    0.0000 C   0  0  0  0  0  0           0  0  0
   -2.2828    3.2897    0.0000 O   0  0  0  0  0  0           0  0  0
  1  2  2  0     0  0
  1  3  1  0     0  0
  1  4  1  0     0  0
  2  5  1  0     0  0
  2  6  1  0     0  0
  3  7  1  0     0  0
  4  8  2  0     0  0
  5  9  2  0     0  0
  6 10  1  0     0  0
  6 11  2  0     0  0
  7 12  1  0     0  0
  7 13  2  0     0  0
 12 14  2  0     0  0
 12 15  1  0     0  0
 14 16  1  0     0  0
 15 17  1  0     0  0
 16 18  1  0     0  0
 17 19  1  0     0  0
 18 20  1  0     0  0
 18 21  2  0     0  0
  8  9  1  0     0  0
 16 17  2  0     0  0
M  END
>  <IDNUMBER>
BAS 00728706

>  <BOX>
2

>  <CELL>
D6

>  <WEIGHT>
10.0

>  <MOL_WEIGHT>
287.27

>  <STRUCT_FORMULA>
C15H13NO5

>  <VENDOR_LOT>
235564

$$$$

          08231011372D 1   1.00000     0.00000     0

 14 15  0     0  0            999 V2000
   -0.4897   -0.2483    0.0000 N   0  0  3  0  0  0           0  0  0
    0.2207    0.1655    0.0000 C   0  0  0  0  0  0           0  0  0
   -1.7897   -0.2483    0.0000 C   0  0  0  0  0  0           0  0  0
   -0.4897   -1.0000    0.0000 C   0  0  0  0  0  0           0  0  0
    0.9345   -0.2448    0.0000 C   0  0  0  0  0  0           0  0  0
    0.2103    0.9897    0.0000 C   0  0  0  0  0  0           0  0  0
   -1.7897   -1.0000    0.0000 C   0  0  0  0  0  0           0  0  0
   -2.3690    0.3310    0.0000 O   0  0  0  0  0  0           0  0  0
   -1.1414   -1.3724    0.0000 S   0  0  0  0  0  0           0  0  0
    0.1586   -1.3724    0.0000 O   0  0  0  0  0  0           0  0  0
    1.6483    0.1759    0.0000 C   0  0  0  0  0  0           0  0  0
    0.9172    1.4069    0.0000 C   0  0  0  0  0  0           0  0  0
    1.6345    1.0000    0.0000 C   0  0  0  0  0  0           0  0  0
    2.3483    1.4172    0.0000 O   0  0  0  0  0  0           0  0  0
  1  2  1  0     0  0
  1  3  1  0     0  0
  1  4  1  0     0  0
  2  5  2  0     0  0
  2  6  1  0     0  0
  3  7  1  0     0  0
  3  8  2  0     0  0
  4  9  1  0     0  0
  4 10  2  0     0  0
  5 11  1  0     0  0
  6 12  2  0     0  0
 11 13  2  0     0  0
 13 14  1  0     0  0
  7  9  1  0     0  0
 12 13  1  0     0  0
M  END
>  <IDNUMBER>
BAS 00779306

>  <BOX>
2

>  <CELL>
D7

>  <WEIGHT>
10.0

>  <MOL_WEIGHT>
209.22

>  <STRUCT_FORMULA>
C9H7NO3S

>  <VENDOR_LOT>
173429

$$$$

          08231011372D 1   1.00000     0.00000     0

 17 18  0     0  0            999 V2000
   -0.6103    0.3897    0.0000 C   0  0  0  0  0  0           0  0  0
   -0.6138   -0.3862    0.0000 C   0  0  0  0  0  0           0  0  0
    0.7379    0.3828    0.0000 N   0  0  3  0  0  0           0  0  0
   -1.2931    0.7828    0.0000 C   0  0  0  0  0  0           0  0  0
    0.0552   -0.7862    0.0000 N   0  0  0  0  0  0           0  0  0
   -1.2931   -0.7793    0.0000 N   0  0  3  0  0  0           0  0  0
    0.7276   -0.4069    0.0000 C   0  0  0  0  0  0           0  0  0
    1.4483    0.7931    0.0000 C   0  0  0  0  0  0           0  0  0
   -1.9655    0.3897    0.0000 N   0  0  0  0  0  0           0  0  0
   -1.2931    1.5655    0.0000 O   0  0  0  0  0  0           0  0  0
   -1.9655   -0.3966    0.0000 C   0  0  0  0  0  0           0  0  0
   -1.2931   -1.5586    0.0000 C   0  0  0  0  0  0           0  0  0
    1.3862   -0.7931    0.0000 S   0  0  0  0  0  0           0  0  0
    2.1586    0.3897    0.0000 C   0  0  0  0  0  0           0  0  0
   -2.6414   -0.7862    0.0000 O   0  0  0  0  0  0           0  0  0
    2.8724    0.8034    0.0000 C   0  0  0  0  0  0           0  0  0
    3.5862    0.3897    0.0000 C   0  0  0  0  0  0           0  0  0
  1  2  2  0     0  0
  1  3  1  0     0  0
  1  4  1  0     0  0
  2  5  1  0     0  0
  2  6  1  0     0  0
  3  7  1  0     0  0
  3  8  1  0     0  0
  4  9  1  0     0  0
  4 10  2  0     0  0
  6 11  1  0     0  0
  6 12  1  0     0  0
  7 13  1  0     0  0
  8 14  1  0     0  0
 11 15  2  0     0  0
 14 16  2  0     0  0
 16 17  1  0     0  0
  5  7  2  0     0  0
  9 11  1  0     0  0
M  END
>  <IDNUMBER>
BAS 00964784

>  <BOX>
2

>  <CELL>
D8

>  <WEIGHT>
10.0

>  <MOL_WEIGHT>
252.30

>  <STRUCT_FORMULA>
C10H12N4O2S

>  <VENDOR_LOT>
124783

$$$$

          08231011372D 1   1.00000     0.00000     0

 20 21  0     0  0            999 V2000
   -0.9931    0.5621    0.0000 C   0  0  0  0  0  0           0  0  0
    0.3552    0.5586    0.0000 N   0  0  3  0  0  0           0  0  0
   -0.9966   -0.2138    0.0000 C   0  0  0  0  0  0           0  0  0
   -1.6759    0.9621    0.0000 C   0  0  0  0  0  0           0  0  0
    0.3448   -0.2310    0.0000 C   0  0  0  0  0  0           0  0  0
    1.0655    0.9724    0.0000 C   0  0  0  0  0  0           0  0  0
   -0.3276   -0.6103    0.0000 N   0  0  0  0  0  0           0  0  0
   -1.6759   -0.6000    0.0000 N   0  0  3  0  0  0           0  0  0
   -2.3483    0.5621    0.0000 N   0  0  0  0  0  0           0  0  0
   -1.6759    1.7414    0.0000 O   0  0  0  0  0  0           0  0  0
    1.1103   -0.2276    0.0000 N   0  0  0  0  0  0           0  0  0
    1.7793    0.5621    0.0000 C   0  0  0  0  0  0           0  0  0
   -2.3483   -0.2207    0.0000 C   0  0  0  0  0  0           0  0  0
   -1.6759   -1.3897    0.0000 C   0  0  0  0  0  0           0  0  0
    1.4897   -0.8966    0.0000 C   0  0  0  0  0  0           0  0  0
    2.4897    0.9724    0.0000 O   0  0  0  0  0  0           0  0  0
   -3.0207   -0.6103    0.0000 O   0  0  0  0  0  0           0  0  0
    2.2621   -0.8966    0.0000 C   0  0  0  0  0  0           0  0  0
    3.2034    0.5655    0.0000 C   0  0  0  0  0  0           0  0  0
    2.6414   -1.5621    0.0000 O   0  0  0  0  0  0           0  0  0
  1  2  1  0     0  0
  1  3  2  0     0  0
  1  4  1  0     0  0
  2  5  1  0     0  0
  2  6  1  0     0  0
  3  7  1  0     0  0
  3  8  1  0     0  0
  4  9  1  0     0  0
  4 10  2  0     0  0
  5 11  1  0     0  0
  6 12  1  0     0  0
  8 13  1  0     0  0
  8 14  1  0     0  0
 11 15  1  0     0  0
 12 16  1  0     0  0
 13 17  2  0     0  0
 15 18  1  0     0  0
 16 19  1  0     0  0
 18 20  1  0     0  0
  5  7  2  0     0  0
  9 13  1  0     0  0
M  END
>  <IDNUMBER>
BAS 00964929

>  <BOX>
2

>  <CELL>
D9

>  <WEIGHT>
10.0

>  <MOL_WEIGHT>
283.29

>  <STRUCT_FORMULA>
C11H17N5O4

>  <VENDOR_LOT>
199626

$$$$

          08231011372D 1   1.00000     0.00000     0

 18 19  0     0  0            999 V2000
   -1.5034    0.6448    0.0000 C   0  0  0  0  0  0           0  0  0
   -0.7483    0.6448    0.0000 C   0  0  0  0  0  0           0  0  0
   -1.8655    1.2897    0.0000 C   0  0  0  0  0  0           0  0  0
   -1.8655    0.0069    0.0000 C   0  0  0  0  0  0           0  0  0
   -0.3862    0.0069    0.0000 C   0  0  0  0  0  0           0  0  0
   -0.3862    1.2897    0.0000 O   0  0  0  0  0  0           0  0  0
   -2.6241    1.2897    0.0000 C   0  0  0  0  0  0           0  0  0
   -2.6241    0.0069    0.0000 C   0  0  0  0  0  0           0  0  0
    0.3759    0.0069    0.0000 S   0  0  0  0  0  0           0  0  0
   -2.9862    0.6448    0.0000 C   0  0  0  0  0  0           0  0  0
    0.7517   -0.6552    0.0000 C   0  0  0  0  0  0           0  0  0
    1.4966   -0.6552    0.0000 N   0  0  3  0  0  0           0  0  0
    0.3759   -1.2931    0.0000 S   0  0  0  0  0  0           0  0  0
    1.8759   -1.2931    0.0000 C   0  0  0  0  0  0           0  0  0
    1.8759    0.0069    0.0000 C   0  0  0  0  0  0           0  0  0
    2.6138   -1.2931    0.0000 C   0  0  0  0  0  0           0  0  0
    2.6138    0.0069    0.0000 C   0  0  0  0  0  0           0  0  0
    2.9966   -0.6552    0.0000 O   0  0  0  0  0  0           0  0  0
  1  2  1  0     0  0
  1  3  1  0     0  0
  1  4  2  0     0  0
  2  5  1  0     0  0
  2  6  2  0     0  0
  3  7  2  0     0  0
  4  8  1  0     0  0
  5  9  1  0     0  0
  7 10  1  0     0  0
  9 11  1  0     0  0
 11 12  1  0     0  0
 11 13  2  0     0  0
 12 14  1  0     0  0
 12 15  1  0     0  0
 14 16  1  0     0  0
 15 17  1  0     0  0
 16 18  1  0     0  0
  8 10  2  0     0  0
 17 18  1  0     0  0
M  END
>  <IDNUMBER>
BAS 01183873

>  <BOX>
2

>  <CELL>
D10

>  <WEIGHT>
10.0

>  <MOL_WEIGHT>
281.40

>  <STRUCT_FORMULA>
C13H15NO2S2

>  <VENDOR_LOT>
54103

$$$$

          08231011372D 1   1.00000     0.00000     0

 17 19  0     0  0            999 V2000
   -0.1621    0.3690    0.0000 C   0  0  0  0  0  0           0  0  0
    0.9828    0.3690    0.0000 N   0  0  3  0  0  0           0  0  0
   -0.1621   -0.2724    0.0000 C   0  0  0  0  0  0           0  0  0
   -0.7517    0.6931    0.0000 C   0  0  0  0  0  0           0  0  0
    0.9690   -0.3000    0.0000 C   0  0  0  0  0  0           0  0  0
    1.5621    0.6931    0.0000 C   0  0  0  0  0  0           0  0  0
    0.4000   -0.6103    0.0000 N   0  0  0  0  0  0           0  0  0
   -0.7517   -0.6000    0.0000 N   0  0  3  0  0  0           0  0  0
   -1.3138    0.3690    0.0000 N   0  0  3  0  0  0           0  0  0
   -0.7517    1.3621    0.0000 O   0  0  0  0  0  0           0  0  0
    1.5379   -0.6379    0.0000 N   0  0  0  0  0  0           0  0  0
    2.1345    0.3517    0.0000 C   0  0  0  0  0  0           0  0  0
   -1.3138   -0.2862    0.0000 C   0  0  0  0  0  0           0  0  0
   -0.7517   -1.2586    0.0000 C   0  0  0  0  0  0           0  0  0
   -1.8655    0.6897    0.0000 C   0  0  0  0  0  0           0  0  0
    2.1207   -0.3207    0.0000 N   0  0  0  0  0  0           0  0  0
   -1.8862   -0.6103    0.0000 O   0  0  0  0  0  0           0  0  0
  1  2  1  0     0  0
  1  3  2  0     0  0
  1  4  1  0     0  0
  2  5  1  0     0  0
  2  6  1  0     0  0
  3  7  1  0     0  0
  3  8  1  0     0  0
  4  9  1  0     0  0
  4 10  2  0     0  0
  5 11  1  0     0  0
  6 12  1  0     0  0
  8 13  1  0     0  0
  8 14  1  0     0  0
  9 15  1  0     0  0
 11 16  1  0     0  0
 13 17  2  0     0  0
  5  7  2  0     0  0
  9 13  1  0     0  0
 12 16  2  0     0  0
M  END
>  <IDNUMBER>
BAS 02999245

>  <BOX>
2

>  <CELL>
D11

>  <WEIGHT>
10.0

>  <MOL_WEIGHT>
234.22

>  <STRUCT_FORMULA>
C9H10N6O2

>  <VENDOR_LOT>
279167

$$$$

          08231011372D 1   1.00000     0.00000     0

 19 20  0     0  0            999 V2000
   -1.2069   -0.2586    0.0000 C   0  0  0  0  0  0           0  0  0
   -0.5621   -0.9207    0.0000 C   0  0  0  0  0  0           0  0  0
   -2.0621   -0.4759    0.0000 C   0  0  0  0  0  0           0  0  0
   -0.9448    0.6241    0.0000 C   0  0  0  0  0  0           0  0  0
    0.3172   -0.7103    0.0000 C   0  0  0  0  0  0           0  0  0
   -2.7069    0.1621    0.0000 N   0  0  0  0  0  0           0  0  0
   -2.3069   -1.3586    0.0000 O   0  0  0  0  0  0           0  0  0
   -1.5828    1.2621    0.0000 N   0  0  0  0  0  0           0  0  0
   -0.0621    0.8621    0.0000 O   0  0  0  0  0  0           0  0  0
    0.9690   -1.3517    0.0000 C   0  0  0  0  0  0           0  0  0
    0.5552    0.1621    0.0000 C   0  0  0  0  0  0           0  0  0
   -2.4448    1.0483    0.0000 C   0  0  0  0  0  0           0  0  0
    1.8448   -1.1207    0.0000 C   0  0  0  0  0  0           0  0  0
    1.4379    0.3897    0.0000 C   0  0  0  0  0  0           0  0  0
   -3.0448    1.7000    0.0000 S   0  0  0  0  0  0           0  0  0
    2.0897   -0.2379    0.0000 C   0  0  0  0  0  0           0  0  0
    2.9552    0.0000    0.0000 N   0  3  0  0  0  0           0  0  0
    3.1552    0.8724    0.0000 O   0  0  0  0  0  0           0  0  0
    3.5931   -0.6379    0.0000 O   0  5  0  0  0  0           0  0  0
  1  2  2  0     0  0
  1  3  1  0     0  0
  1  4  1  0     0  0
  2  5  1  0     0  0
  3  6  1  0     0  0
  3  7  2  0     0  0
  4  8  1  0     0  0
  4  9  2  0     0  0
  5 10  2  0     0  0
  5 11  1  0     0  0
  6 12  1  0     0  0
 10 13  1  0     0  0
 11 14  2  0     0  0
 12 15  2  0     0  0
 13 16  2  0     0  0
 16 17  1  0     0  0
 17 18  2  0     0  0
 17 19  1  0     0  0
  8 12  1  0     0  0
 14 16  1  0     0  0
M  CHG  2  17   1  19  -1
M  END
>  <IDNUMBER>
BAS 00277595

>  <BOX>
2

>  <CELL>
D12

>  <WEIGHT>
10.0

>  <MOL_WEIGHT>
277.26

>  <STRUCT_FORMULA>
C11H7N3O4S

>  <VENDOR_LOT>
52538

$$$$

          08231011372D 1   1.00000     0.00000     0

 22 24  0     0  0            999 V2000
    1.3931   -0.6069    0.0000 C   0  0  0  0  0  0           0  0  0
    1.3931    0.2276    0.0000 C   0  0  0  0  0  0           0  0  0
    2.1793   -0.8621    0.0000 N   0  0  3  0  0  0           0  0  0
    0.6690   -1.0172    0.0000 C   0  0  0  0  0  0           0  0  0
    0.6690    0.6379    0.0000 C   0  0  0  0  0  0           0  0  0
    2.1793    0.4828    0.0000 N   0  0  0  0  0  0           0  0  0
    2.6690   -0.1862    0.0000 C   0  0  0  0  0  0           0  0  0
    2.4345   -1.6448    0.0000 C   0  0  3  0  0  0           0  0  0
   -0.0414   -0.6069    0.0000 C   0  0  0  0  0  0           0  0  0
   -0.0414    0.2172    0.0000 C   0  0  0  0  0  0           0  0  0
    3.2207   -1.4103    0.0000 C   0  0  0  0  0  0           0  0  0
    1.6448   -1.8828    0.0000 C   0  0  0  0  0  0           0  0  0
    2.6448   -2.4345    0.0000 C   0  0  0  0  0  0           0  0  0
   -0.7552    0.6310    0.0000 N   0  0  0  0  0  0           0  0  0
   -1.4655    0.2276    0.0000 C   0  0  0  0  0  0           0  0  0
   -2.1793    0.6448    0.0000 C   0  0  0  0  0  0           0  0  0
   -2.1724    1.4655    0.0000 C   0  0  0  0  0  0           0  0  0
   -2.8931    0.2310    0.0000 C   0  0  0  0  0  0           0  0  0
   -2.8828    1.8828    0.0000 C   0  0  0  0  0  0           0  0  0
   -1.4586    1.8828    0.0000 O   0  0  0  0  0  0           0  0  0
   -3.6034    0.6448    0.0000 C   0  0  0  0  0  0           0  0  0
   -3.6034    1.4759    0.0000 C   0  0  0  0  0  0           0  0  0
  1  2  1  0     0  0
  1  3  1  0     0  0
  1  4  2  0     0  0
  2  5  2  0     0  0
  2  6  1  0     0  0
  3  7  1  0     0  0
  3  8  1  0     0  0
  4  9  1  0     0  0
  5 10  1  0     0  0
  8 11  1  0     0  0
  8 12  1  0     0  0
  8 13  1  0     0  0
 10 14  1  0     0  0
 14 15  2  0     0  0
 15 16  1  0     0  0
 16 17  2  0     0  0
 16 18  1  0     0  0
 17 19  1  0     0  0
 17 20  1  0     0  0
 18 21  2  0     0  0
 19 22  2  0     0  0
  6  7  2  0     0  0
  9 10  2  0     0  0
 21 22  1  0     0  0
M  END
>  <IDNUMBER>
BAS 00631739

>  <BOX>
2

>  <CELL>
E1

>  <WEIGHT>
10.0

>  <MOL_WEIGHT>
293.37

>  <STRUCT_FORMULA>
C18H19N3O

>  <VENDOR_LOT>
278496

$$$$

          08231011372D 1   1.00000     0.00000     0

 21 22  0     0  0            999 V2000
    0.1862   -0.3138    0.0000 C   0  0  0  0  0  0           0  0  0
    0.8379    0.0621    0.0000 C   0  0  0  0  0  0           0  0  0
    0.1862   -1.0759    0.0000 C   0  0  0  0  0  0           0  0  0
   -0.4759    0.0759    0.0000 C   0  0  0  0  0  0           0  0  0
    0.8379    0.8103    0.0000 C   0  0  0  0  0  0           0  0  0
   -0.4759   -1.4621    0.0000 C   0  0  0  0  0  0           0  0  0
   -1.1379   -0.3138    0.0000 C   0  0  0  0  0  0           0  0  0
    0.1862    1.1862    0.0000 C   0  0  0  0  0  0           0  0  0
    1.4862    1.1793    0.0000 C   0  0  0  0  0  0           0  0  0
   -1.1379   -1.0759    0.0000 C   0  0  0  0  0  0           0  0  0
   -0.4759   -2.2138    0.0000 C   0  0  0  0  0  0           0  0  0
    0.1966    1.9379    0.0000 N   0  0  0  0  0  0           0  0  0
   -0.4621    0.8103    0.0000 O   0  0  0  0  0  0           0  0  0
    1.4966    1.9276    0.0000 N   0  0  0  0  0  0           0  0  0
    2.1379    0.8000    0.0000 O   0  0  0  0  0  0           0  0  0
   -1.7621   -1.4379    0.0000 O   0  0  0  0  0  0           0  0  0
   -1.1172   -2.5897    0.0000 O   0  0  0  0  0  0           0  0  0
    0.1759   -2.5897    0.0000 O   0  0  0  0  0  0           0  0  0
    0.8448    2.3034    0.0000 C   0  0  0  0  0  0           0  0  0
   -2.3862   -1.0759    0.0000 C   0  0  0  0  0  0           0  0  0
    0.8517    3.0517    0.0000 O   0  0  0  0  0  0           0  0  0
  1  2  1  0     0  0
  1  3  1  0     0  0
  1  4  2  0     0  0
  2  5  2  0     0  0
  3  6  2  0     0  0
  4  7  1  0     0  0
  5  8  1  0     0  0
  5  9  1  0     0  0
  6 10  1  0     0  0
  6 11  1  0     0  0
  8 12  1  0     0  0
  8 13  2  0     0  0
  9 14  1  0     0  0
  9 15  2  0     0  0
 10 16  1  0     0  0
 11 17  1  0     0  0
 11 18  2  0     0  0
 12 19  1  0     0  0
 16 20  1  0     0  0
 19 21  2  0     0  0
  7 10  2  0     0  0
 14 19  1  0     0  0
M  END
>  <IDNUMBER>
BAS 01974958

>  <BOX>
2

>  <CELL>
E2

>  <WEIGHT>
10.0

>  <MOL_WEIGHT>
290.23

>  <STRUCT_FORMULA>
C13H10N2O6

>  <VENDOR_LOT>
259699

$$$$

          08231011372D 1   1.00000     0.00000     0

 22 24  0     0  0            999 V2000
   -1.1828   -1.6966    0.0000 C   0  0  0  0  0  0           0  0  0
   -0.3414   -1.2172    0.0000 C   0  0  0  0  0  0           0  0  0
   -1.1828   -2.6552    0.0000 C   0  0  0  0  0  0           0  0  0
   -2.0207   -1.2172    0.0000 C   0  0  0  0  0  0           0  0  0
   -0.3414   -0.2345    0.0000 N   0  0  0  0  0  0           0  0  0
    0.4966   -1.6966    0.0000 C   0  0  0  0  0  0           0  0  0
   -0.3414   -3.1345    0.0000 C   0  0  0  0  0  0           0  0  0
   -2.0207   -3.1345    0.0000 C   0  0  0  0  0  0           0  0  0
   -2.8621   -1.6966    0.0000 C   0  0  0  0  0  0           0  0  0
    0.4966    0.2448    0.0000 N   0  0  0  0  0  0           0  0  0
    0.4966   -2.6552    0.0000 C   0  0  0  0  0  0           0  0  0
    1.3586   -1.2345    0.0000 O   0  0  0  0  0  0           0  0  0
   -2.8621   -2.6552    0.0000 C   0  0  0  0  0  0           0  0  0
    0.4966    1.2241    0.0000 C   0  0  0  0  0  0           0  0  0
    1.3379    1.7034    0.0000 C   0  0  0  0  0  0           0  0  0
   -0.3414    1.7034    0.0000 C   0  0  0  0  0  0           0  0  0
    1.3379    2.6655    0.0000 C   0  0  0  0  0  0           0  0  0
   -0.3414    2.6655    0.0000 C   0  0  0  0  0  0           0  0  0
    0.4966    3.1448    0.0000 C   0  0  0  0  0  0           0  0  0
    2.1793    3.1448    0.0000 C   0  0  0  0  0  0           0  0  0
    2.9586    2.6138    0.0000 O   0  0  0  0  0  0           0  0  0
    2.1793    4.1241    0.0000 O   0  0  0  0  0  0           0  0  0
  1  2  1  0     0  0
  1  3  1  0     0  0
  1  4  2  0     0  0
  2  5  1  0     0  0
  2  6  2  0     0  0
  3  7  1  0     0  0
  3  8  2  0     0  0
  4  9  1  0     0  0
  5 10  2  0     0  0
  6 11  1  0     0  0
  6 12  1  0     0  0
  8 13  1  0     0  0
 10 14  1  0     0  0
 14 15  1  0     0  0
 14 16  2  0     0  0
 15 17  2  0     0  0
 16 18  1  0     0  0
 17 19  1  0     0  0
 17 20  1  0     0  0
 20 21  1  0     0  0
 20 22  2  0     0  0
  7 11  2  0     0  0
  9 13  2  0     0  0
 18 19  2  0     0  0
M  END
>  <IDNUMBER>
BAS 01900533

>  <BOX>
2

>  <CELL>
E3

>  <WEIGHT>
10.0

>  <MOL_WEIGHT>
292.29

>  <STRUCT_FORMULA>
C17H12N2O3

>  <VENDOR_LOT>
268737

$$$$

          08231011372D 1   1.00000     0.00000     0

 19 20  0     0  0            999 V2000
   -0.5241   -0.4448    0.0000 N   0  0  3  0  0  0           0  0  0
   -0.0379    0.2172    0.0000 C   0  0  0  0  0  0           0  0  0
   -0.2655   -1.2310    0.0000 C   0  0  0  0  0  0           0  0  0
   -1.3483   -0.4517    0.0000 C   0  0  0  0  0  0           0  0  0
    0.7897    0.1207    0.0000 C   0  0  0  0  0  0           0  0  0
   -0.3724    0.9586    0.0000 C   0  0  0  0  0  0           0  0  0
   -0.9379   -1.7276    0.0000 C   0  0  0  0  0  0           0  0  0
    0.5138   -1.4897    0.0000 C   0  0  0  0  0  0           0  0  0
   -1.6034   -1.2448    0.0000 C   0  0  0  0  0  0           0  0  0
   -1.8379    0.2172    0.0000 C   0  0  0  0  0  0           0  0  0
    1.2724    0.7931    0.0000 C   0  0  0  0  0  0           0  0  0
    1.1207   -0.6276    0.0000 C   0  0  0  0  0  0           0  0  0
    0.1138    1.6207    0.0000 C   0  0  0  0  0  0           0  0  0
   -0.9379   -2.5517    0.0000 C   0  0  0  0  0  0           0  0  0
    0.9379    1.5379    0.0000 C   0  0  0  0  0  0           0  0  0
   -1.6483   -2.9655    0.0000 O   0  0  0  0  0  0           0  0  0
    1.4276    2.2000    0.0000 C   0  0  0  0  0  0           0  0  0
    2.2483    2.1138    0.0000 O   0  0  0  0  0  0           0  0  0
    1.0897    2.9517    0.0000 O   0  0  0  0  0  0           0  0  0
  1  2  1  0     0  0
  1  3  1  0     0  0
  1  4  1  0     0  0
  2  5  2  0     0  0
  2  6  1  0     0  0
  3  7  2  0     0  0
  3  8  1  0     0  0
  4  9  2  0     0  0
  4 10  1  0     0  0
  5 11  1  0     0  0
  5 12  1  0     0  0
  6 13  2  0     0  0
  7 14  1  0     0  0
 11 15  2  0     0  0
 14 16  2  0     0  0
 15 17  1  0     0  0
 17 18  1  0     0  0
 17 19  2  0     0  0
  7  9  1  0     0  0
 13 15  1  0     0  0
M  END
>  <IDNUMBER>
BAS 02882177

>  <BOX>
2

>  <CELL>
E4

>  <WEIGHT>
10.0

>  <MOL_WEIGHT>
257.29

>  <STRUCT_FORMULA>
C15H15NO3

>  <VENDOR_LOT>
272967

$$$$

          08231011372D 1   1.00000     0.00000     0

 19 20  0     0  0            999 V2000
   -0.6448   -0.1690    0.0000 N   0  0  3  0  0  0           0  0  0
   -0.1586    0.4931    0.0000 C   0  0  0  0  0  0           0  0  0
   -0.3897   -0.9552    0.0000 C   0  0  0  0  0  0           0  0  0
   -1.4724   -0.1759    0.0000 C   0  0  0  0  0  0           0  0  0
    0.6655    0.4000    0.0000 C   0  0  0  0  0  0           0  0  0
   -0.4966    1.2345    0.0000 C   0  0  0  0  0  0           0  0  0
   -1.0586   -1.4517    0.0000 C   0  0  0  0  0  0           0  0  0
    0.3897   -1.2138    0.0000 C   0  0  0  0  0  0           0  0  0
   -1.7241   -0.9690    0.0000 C   0  0  0  0  0  0           0  0  0
   -1.9586    0.4931    0.0000 C   0  0  0  0  0  0           0  0  0
    1.1483    1.0690    0.0000 C   0  0  0  0  0  0           0  0  0
    1.0000   -0.3517    0.0000 C   0  0  0  0  0  0           0  0  0
   -0.0103    1.9000    0.0000 C   0  0  0  0  0  0           0  0  0
   -1.0586   -2.2759    0.0000 C   0  0  0  0  0  0           0  0  0
    0.8172    1.8138    0.0000 C   0  0  0  0  0  0           0  0  0
    1.9655    0.9828    0.0000 C   0  0  0  0  0  0           0  0  0
   -1.7724   -2.6897    0.0000 O   0  0  0  0  0  0           0  0  0
    2.3034    0.2207    0.0000 O   0  0  0  0  0  0           0  0  0
    2.4552    1.6448    0.0000 O   0  0  0  0  0  0           0  0  0
  1  2  1  0     0  0
  1  3  1  0     0  0
  1  4  1  0     0  0
  2  5  2  0     0  0
  2  6  1  0     0  0
  3  7  2  0     0  0
  3  8  1  0     0  0
  4  9  2  0     0  0
  4 10  1  0     0  0
  5 11  1  0     0  0
  5 12  1  0     0  0
  6 13  2  0     0  0
  7 14  1  0     0  0
 11 15  2  0     0  0
 11 16  1  0     0  0
 14 17  2  0     0  0
 16 18  1  0     0  0
 16 19  2  0     0  0
  7  9  1  0     0  0
 13 15  1  0     0  0
M  END
>  <IDNUMBER>
BAS 02891938

>  <BOX>
2

>  <CELL>
E5

>  <WEIGHT>
10.0

>  <MOL_WEIGHT>
257.29

>  <STRUCT_FORMULA>
C15H15NO3

>  <VENDOR_LOT>
272968

$$$$

          08231011372D 1   1.00000     0.00000     0

 22 24  0     0  0            999 V2000
    0.2448   -0.3276    0.0000 C   0  0  3  0  0  0           0  0  0
   -0.6552   -0.8483    0.0000 C   0  0  0  0  0  0           0  0  0
    0.2448    0.7069    0.0000 C   0  0  0  0  0  0           0  0  0
    1.1448   -0.8483    0.0000 C   0  0  0  0  0  0           0  0  0
   -0.6552   -1.8931    0.0000 C   0  0  0  0  0  0           0  0  0
   -1.5552   -0.3276    0.0000 C   0  0  0  0  0  0           0  0  0
    1.1448    1.2345    0.0000 C   0  0  0  0  0  0           0  0  0
   -0.6552    1.2345    0.0000 C   0  0  0  0  0  0           0  0  0
    1.1448   -1.8931    0.0000 C   0  0  0  0  0  0           0  0  0
    2.0621   -0.3276    0.0000 C   0  0  0  0  0  0           0  0  0
    0.2448   -2.4138    0.0000 O   0  0  0  0  0  0           0  0  0
   -1.5552   -2.4138    0.0000 C   0  0  0  0  0  0           0  0  0
   -2.4552   -0.8483    0.0000 C   0  0  0  0  0  0           0  0  0
    1.1448    2.2724    0.0000 C   0  0  0  0  0  0           0  0  0
   -0.6552    2.2724    0.0000 C   0  0  0  0  0  0           0  0  0
    2.0621   -2.4276    0.0000 N   0  0  0  0  0  0           0  0  0
    2.9621    0.2069    0.0000 N   0  0  0  0  0  0           0  0  0
   -2.4552   -1.8931    0.0000 C   0  0  0  0  0  0           0  0  0
    0.2448    2.7862    0.0000 C   0  0  0  0  0  0           0  0  0
   -3.3759   -2.4276    0.0000 O   0  0  0  0  0  0           0  0  0
    0.2448    3.8345    0.0000 O   0  0  0  0  0  0           0  0  0
    1.1448    4.3517    0.0000 C   0  0  0  0  0  0           0  0  0
  1  2  1  0     0  0
  1  3  1  0     0  0
  1  4  1  0     0  0
  2  5  2  0     0  0
  2  6  1  0     0  0
  3  7  2  0     0  0
  3  8  1  0     0  0
  4  9  2  0     0  0
  4 10  1  0     0  0
  5 11  1  0     0  0
  5 12  1  0     0  0
  6 13  2  0     0  0
  7 14  1  0     0  0
  8 15  2  0     0  0
  9 16  1  0     0  0
 10 17  3  0     0  0
 12 18  2  0     0  0
 14 19  2  0     0  0
 18 20  1  0     0  0
 19 21  1  0     0  0
 21 22  1  0     0  0
  9 11  1  0     0  0
 13 18  1  0     0  0
 15 19  1  0     0  0
M  END
>  <IDNUMBER>
BAS 00622666

>  <BOX>
2

>  <CELL>
E6

>  <WEIGHT>
10.0

>  <MOL_WEIGHT>
294.31

>  <STRUCT_FORMULA>
C17H14N2O3

>  <VENDOR_LOT>
318218

$$$$

          08231011372D 1   1.00000     0.00000     0

 19 20  0     0  0            999 V2000
    1.0828   -0.4103    0.0000 C   0  0  0  0  0  0           0  0  0
    1.0862   -1.1966    0.0000 C   0  0  0  0  0  0           0  0  0
    0.3966    0.0000    0.0000 C   0  0  0  0  0  0           0  0  0
    1.8241   -0.1517    0.0000 N   0  0  3  0  0  0           0  0  0
    0.3966   -1.5897    0.0000 N   0  0  3  0  0  0           0  0  0
    1.8379   -1.4379    0.0000 N   0  0  0  0  0  0           0  0  0
   -0.2897   -0.4103    0.0000 N   0  0  3  0  0  0           0  0  0
    0.3966    0.7862    0.0000 O   0  0  0  0  0  0           0  0  0
    2.3759   -0.8000    0.0000 C   0  0  0  0  0  0           0  0  0
    2.0759    0.6000    0.0000 C   0  0  0  0  0  0           0  0  0
   -0.2897   -1.1966    0.0000 C   0  0  0  0  0  0           0  0  0
    0.3966   -2.3621    0.0000 C   0  0  0  0  0  0           0  0  0
   -0.9793   -0.0138    0.0000 C   0  0  0  0  0  0           0  0  0
   -0.9793   -1.5897    0.0000 O   0  0  0  0  0  0           0  0  0
   -0.9931    0.8103    0.0000 C   0  0  0  0  0  0           0  0  0
   -1.7138    1.2103    0.0000 N   0  0  0  0  0  0           0  0  0
   -1.7241    2.0379    0.0000 C   0  0  0  0  0  0           0  0  0
   -2.4414    2.4414    0.0000 C   0  0  0  0  0  0           0  0  0
   -2.4517    3.2724    0.0000 O   0  0  0  0  0  0           0  0  0
  1  2  2  0     0  0
  1  3  1  0     0  0
  1  4  1  0     0  0
  2  5  1  0     0  0
  2  6  1  0     0  0
  3  7  1  0     0  0
  3  8  2  0     0  0
  4  9  1  0     0  0
  4 10  1  0     0  0
  5 11  1  0     0  0
  5 12  1  0     0  0
  7 13  1  0     0  0
 11 14  2  0     0  0
 13 15  1  0     0  0
 15 16  1  0     0  0
 16 17  1  0     0  0
 17 18  1  0     0  0
 18 19  1  0     0  0
  6  9  2  0     0  0
  7 11  1  0     0  0
M  END
>  <IDNUMBER>
BAS 05022029

>  <SALTDATA>
HBr

>  <BOX>
2

>  <CELL>
E7

>  <WEIGHT>
10.0

>  <MOL_WEIGHT>
267.29

>  <STRUCT_FORMULA>
C11H17N5O3

>  <VENDOR_LOT>
392490

$$$$

          08231011372D 1   1.00000     0.00000     0

 21 23  0     0  0            999 V2000
    1.6172   -0.8724    0.0000 C   0  0  0  0  0  0           0  0  0
    0.9069   -0.4621    0.0000 C   0  0  0  0  0  0           0  0  0
    2.3345   -0.4621    0.0000 C   0  0  0  0  0  0           0  0  0
    1.7931   -1.6793    0.0000 C   0  0  0  0  0  0           0  0  0
    0.9069    0.3621    0.0000 C   0  0  0  0  0  0           0  0  0
    0.1931   -0.8724    0.0000 C   0  0  0  0  0  0           0  0  0
    2.3345    0.3621    0.0000 C   0  0  0  0  0  0           0  0  0
    2.9483   -1.0138    0.0000 C   0  0  0  0  0  0           0  0  0
    2.6103   -1.7655    0.0000 C   0  0  0  0  0  0           0  0  0
    0.1931    0.7759    0.0000 C   0  0  0  0  0  0           0  0  0
    1.6172    0.7759    0.0000 O   0  0  0  0  0  0           0  0  0
   -0.5276   -0.4621    0.0000 C   0  0  0  0  0  0           0  0  0
    3.0552    0.7759    0.0000 O   0  0  0  0  0  0           0  0  0
   -0.5276    0.3621    0.0000 C   0  0  0  0  0  0           0  0  0
   -1.2448    0.7759    0.0000 O   0  0  0  0  0  0           0  0  0
   -1.9552    0.3586    0.0000 C   0  0  0  0  0  0           0  0  0
   -2.6759    0.7724    0.0000 C   0  0  0  0  0  0           0  0  0
   -3.3897    0.3586    0.0000 N   0  0  3  0  0  0           0  0  0
   -2.6897    1.5966    0.0000 O   0  0  0  0  0  0           0  0  0
   -4.1069    0.7724    0.0000 C   0  0  0  0  0  0           0  0  0
   -3.3897   -0.4655    0.0000 C   0  0  0  0  0  0           0  0  0
  1  2  1  0     0  0
  1  3  2  0     0  0
  1  4  1  0     0  0
  2  5  1  0     0  0
  2  6  2  0     0  0
  3  7  1  0     0  0
  3  8  1  0     0  0
  4  9  1  0     0  0
  5 10  2  0     0  0
  5 11  1  0     0  0
  6 12  1  0     0  0
  7 13  2  0     0  0
 10 14  1  0     0  0
 14 15  1  0     0  0
 15 16  1  0     0  0
 16 17  1  0     0  0
 17 18  1  0     0  0
 17 19  2  0     0  0
 18 20  1  0     0  0
 18 21  1  0     0  0
  7 11  1  0     0  0
  8  9  1  0     0  0
 12 14  2  0     0  0
M  END
>  <IDNUMBER>
BAS 02236279

>  <BOX>
2

>  <CELL>
E8

>  <WEIGHT>
10.0

>  <MOL_WEIGHT>
287.31

>  <STRUCT_FORMULA>
C16H17NO4

>  <VENDOR_LOT>
248566

$$$$

          08231011372D 1   1.00000     0.00000     0

 20 21  0     0  0            999 V2000
    0.5759    0.4138    0.0000 C   0  0  0  0  0  0           0  0  0
    0.5759   -0.4103    0.0000 C   0  0  0  0  0  0           0  0  0
   -0.1379    0.8241    0.0000 C   0  0  0  0  0  0           0  0  0
    1.2862    0.8241    0.0000 O   0  0  0  0  0  0           0  0  0
    1.2862   -0.8241    0.0000 C   0  0  0  0  0  0           0  0  0
   -0.1379   -0.8241    0.0000 C   0  0  0  0  0  0           0  0  0
   -0.8586    0.4138    0.0000 C   0  0  0  0  0  0           0  0  0
   -0.1379    1.6517    0.0000 C   0  0  0  0  0  0           0  0  0
    2.0034    0.4138    0.0000 C   0  0  0  0  0  0           0  0  0
    2.0034   -0.4103    0.0000 C   0  0  0  0  0  0           0  0  0
    1.2862   -1.6483    0.0000 C   0  0  0  0  0  0           0  0  0
   -0.8586   -0.4103    0.0000 C   0  0  0  0  0  0           0  0  0
   -1.5759    0.8241    0.0000 O   0  0  0  0  0  0           0  0  0
    2.7241    0.8241    0.0000 O   0  0  0  0  0  0           0  0  0
    2.0000   -2.0621    0.0000 C   0  0  0  0  0  0           0  0  0
   -2.2862    0.4138    0.0000 C   0  0  0  0  0  0           0  0  0
    2.0000   -2.8862    0.0000 C   0  0  0  0  0  0           0  0  0
   -3.0069    0.8172    0.0000 C   0  0  0  0  0  0           0  0  0
   -3.7207    0.4034    0.0000 N   0  0  0  0  0  0           0  0  0
   -3.0207    1.6517    0.0000 O   0  0  0  0  0  0           0  0  0
  1  2  1  0     0  0
  1  3  2  0     0  0
  1  4  1  0     0  0
  2  5  1  0     0  0
  2  6  2  0     0  0
  3  7  1  0     0  0
  3  8  1  0     0  0
  4  9  1  0     0  0
  5 10  2  0     0  0
  5 11  1  0     0  0
  6 12  1  0     0  0
  7 13  1  0     0  0
  9 14  2  0     0  0
 11 15  1  0     0  0
 13 16  1  0     0  0
 15 17  1  0     0  0
 16 18  1  0     0  0
 18 19  1  0     0  0
 18 20  2  0     0  0
  7 12  2  0     0  0
  9 10  1  0     0  0
M  END
>  <IDNUMBER>
BAS 03149702

>  <BOX>
2

>  <CELL>
E9

>  <WEIGHT>
10.0

>  <MOL_WEIGHT>
275.30

>  <STRUCT_FORMULA>
C15H17NO4

>  <VENDOR_LOT>
297538

$$$$

          08231011372D 1   1.00000     0.00000     0

 21 23  0     0  0            999 V2000
   -2.4069   -0.7103    0.0000 C   0  0  0  0  0  0           0  0  0
   -2.4069    0.2897    0.0000 C   0  0  0  0  0  0           0  0  0
   -1.5207   -1.2379    0.0000 N   0  0  0  0  0  0           0  0  0
   -3.3069   -1.2379    0.0000 C   0  0  0  0  0  0           0  0  0
   -1.5069    0.8103    0.0000 C   0  0  0  0  0  0           0  0  0
   -3.3069    0.8241    0.0000 C   0  0  0  0  0  0           0  0  0
   -0.6000   -0.7276    0.0000 C   0  0  0  0  0  0           0  0  0
   -4.2207   -0.7276    0.0000 C   0  0  0  0  0  0           0  0  0
   -0.6000    0.3103    0.0000 N   0  0  0  0  0  0           0  0  0
   -1.5207    1.8724    0.0000 O   0  0  0  0  0  0           0  0  0
   -4.2207    0.3103    0.0000 C   0  0  0  0  0  0           0  0  0
    0.2931   -1.2586    0.0000 C   0  0  0  0  0  0           0  0  0
    1.2000   -0.7483    0.0000 N   0  0  3  0  0  0           0  0  0
    1.2310    0.3034    0.0000 C   0  0  0  0  0  0           0  0  0
    2.0931   -1.2759    0.0000 C   0  0  0  0  0  0           0  0  0
    2.1414    0.8034    0.0000 C   0  0  0  0  0  0           0  0  0
    2.9931   -0.7586    0.0000 C   0  0  0  0  0  0           0  0  0
    3.0207    0.2828    0.0000 C   0  0  3  0  0  0           0  0  0
    3.9207    0.7897    0.0000 C   0  0  0  0  0  0           0  0  0
    4.8310    0.2724    0.0000 N   0  0  0  0  0  0           0  0  0
    3.9000    1.8103    0.0000 O   0  0  0  0  0  0           0  0  0
  1  2  2  0     0  0
  1  3  1  0     0  0
  1  4  1  0     0  0
  2  5  1  0     0  0
  2  6  1  0     0  0
  3  7  2  0     0  0
  4  8  2  0     0  0
  5  9  2  0     0  0
  5 10  1  0     0  0
  6 11  2  0     0  0
  7 12  1  0     0  0
 12 13  1  0     0  0
 13 14  1  0     0  0
 13 15  1  0     0  0
 14 16  1  0     0  0
 15 17  1  0     0  0
 16 18  1  0     0  0
 18 19  1  0     0  0
 19 20  1  0     0  0
 19 21  2  0     0  0
  7  9  1  0     0  0
  8 11  1  0     0  0
 17 18  1  0     0  0
M  END
>  <IDNUMBER>
BAS 04913935

>  <BOX>
2

>  <CELL>
E10

>  <WEIGHT>
10.0

>  <MOL_WEIGHT>
286.33

>  <STRUCT_FORMULA>
C15H18N4O2

>  <VENDOR_LOT>
389423

$$$$

          08231011372D 1   1.00000     0.00000     0

 19 20  0     0  0            999 V2000
    1.6034   -0.4276    0.0000 C   0  0  0  0  0  0           0  0  0
    1.5172    0.3724    0.0000 C   0  0  0  0  0  0           0  0  0
    2.4138   -0.5931    0.0000 C   0  0  0  0  0  0           0  0  0
    1.0655   -1.0414    0.0000 C   0  0  0  0  0  0           0  0  0
    2.2690    0.7069    0.0000 C   0  0  0  0  0  0           0  0  0
    0.8172    0.7931    0.0000 C   0  0  0  0  0  0           0  0  0
    2.8172    0.0931    0.0000 N   0  0  0  0  0  0           0  0  0
    2.6655   -1.3759    0.0000 C   0  0  0  0  0  0           0  0  0
    1.3172   -1.8069    0.0000 C   0  0  0  0  0  0           0  0  0
    0.1138    0.3931    0.0000 C   0  0  0  0  0  0           0  0  0
    2.1138   -1.9759    0.0000 C   0  0  0  0  0  0           0  0  0
   -0.5862    0.8069    0.0000 N   0  0  0  0  0  0           0  0  0
   -1.2862    0.3931    0.0000 C   0  0  0  0  0  0           0  0  0
   -1.9828    0.8103    0.0000 C   0  0  0  0  0  0           0  0  0
   -1.2862   -0.4069    0.0000 O   0  0  0  0  0  0           0  0  0
   -2.6862    0.4069    0.0000 C   0  0  0  0  0  0           0  0  0
   -3.3966    0.8103    0.0000 C   0  0  0  0  0  0           0  0  0
   -4.0966    0.4103    0.0000 O   0  0  0  0  0  0           0  0  0
   -3.3966    1.6310    0.0000 O   0  0  0  0  0  0           0  0  0
  1  2  1  0     0  0
  1  3  2  0     0  0
  1  4  1  0     0  0
  2  5  2  0     0  0
  2  6  1  0     0  0
  3  7  1  0     0  0
  3  8  1  0     0  0
  4  9  2  0     0  0
  6 10  1  0     0  0
  8 11  2  0     0  0
 10 12  1  0     0  0
 12 13  1  0     0  0
 13 14  1  0     0  0
 13 15  2  0     0  0
 14 16  2  0     0  0
 16 17  1  0     0  0
 17 18  1  0     0  0
 17 19  2  0     0  0
  5  7  1  0     0  0
  9 11  1  0     0  0
M  END
>  <IDNUMBER>
BAS 02078002

>  <BOX>
2

>  <CELL>
E11

>  <WEIGHT>
10.0

>  <MOL_WEIGHT>
258.28

>  <STRUCT_FORMULA>
C14H14N2O3

>  <VENDOR_LOT>
237061

$$$$

          08231011372D 1   1.00000     0.00000     0

 21 23  0     0  0            999 V2000
   -1.8724   -0.6310    0.0000 C   0  0  0  0  0  0           0  0  0
   -1.8724    0.2862    0.0000 C   0  0  0  0  0  0           0  0  0
   -1.0138   -0.9138    0.0000 C   0  0  0  0  0  0           0  0  0
   -2.6552   -1.0931    0.0000 C   0  0  0  0  0  0           0  0  0
   -1.0138    0.5690    0.0000 C   0  0  0  0  0  0           0  0  0
   -2.6552    0.7276    0.0000 C   0  0  0  0  0  0           0  0  0
   -0.4931   -0.1724    0.0000 C   0  0  0  0  0  0           0  0  0
   -0.7138   -1.7931    0.0000 O   0  0  0  0  0  0           0  0  0
   -3.4345   -0.6310    0.0000 C   0  0  0  0  0  0           0  0  0
   -0.7138    1.4276    0.0000 O   0  0  0  0  0  0           0  0  0
   -3.4345    0.2862    0.0000 C   0  0  0  0  0  0           0  0  0
    0.4276   -0.1931    0.0000 C   0  0  0  0  0  0           0  0  0
    0.8655   -0.9724    0.0000 N   0  0  0  0  0  0           0  0  0
    0.8655    0.5862    0.0000 C   0  0  0  0  0  0           0  0  0
    1.7655   -0.9724    0.0000 C   0  0  0  0  0  0           0  0  0
    2.2138   -0.2034    0.0000 C   0  0  0  0  0  0           0  0  0
    1.7655    0.5690    0.0000 C   0  0  0  0  0  0           0  0  0
    3.1276   -0.1931    0.0000 C   0  0  0  0  0  0           0  0  0
    2.2069    1.3552    0.0000 C   0  0  0  0  0  0           0  0  0
    3.5655    0.5966    0.0000 N   0  0  0  0  0  0           0  0  0
    3.0931    1.3862    0.0000 C   0  0  0  0  0  0           0  0  0
  1  2  2  0     0  0
  1  3  1  0     0  0
  1  4  1  0     0  0
  2  5  1  0     0  0
  2  6  1  0     0  0
  3  7  1  0     0  0
  3  8  2  0     0  0
  4  9  2  0     0  0
  5 10  2  0     0  0
  6 11  2  0     0  0
  7 12  2  0     0  0
 12 13  1  0     0  0
 12 14  1  0     0  0
 13 15  1  0     0  0
 15 16  1  0     0  0
 16 17  1  0     0  0
 16 18  2  0     0  0
 17 19  2  0     0  0
 18 20  1  0     0  0
 19 21  1  0     0  0
  5  7  1  0     0  0
  9 11  1  0     0  0
 20 21  2  0     0  0
M  END
>  <IDNUMBER>
BAS 02927197

>  <BOX>
2

>  <CELL>
E12

>  <WEIGHT>
10.0

>  <MOL_WEIGHT>
278.31

>  <STRUCT_FORMULA>
C17H14N2O2

>  <VENDOR_LOT>
268136

$$$$

          08231011372D 1   1.00000     0.00000     0

 20 22  0     0  0            999 V2000
    0.0552   -0.2207    0.0000 C   0  0  3  0  0  0           0  0  0
   -1.6966   -1.2310    0.0000 C   0  0  0  0  0  0           0  0  0
    0.0552    1.8034    0.0000 C   0  0  0  0  0  0           0  0  0
    1.8138   -1.2310    0.0000 C   0  0  0  0  0  0           0  0  0
   -1.6966   -3.2621    0.0000 C   0  0  0  0  0  0           0  0  0
   -3.6241   -0.6069    0.0000 C   0  0  0  0  0  0           0  0  0
    1.8138    2.8207    0.0000 C   0  0  0  0  0  0           0  0  0
   -1.6966    2.8207    0.0000 C   0  0  0  0  0  0           0  0  0
    1.8138   -3.2621    0.0000 C   0  0  0  0  0  0           0  0  0
    3.5655   -0.2207    0.0000 C   0  0  0  0  0  0           0  0  0
    0.0552   -4.2724    0.0000 O   0  0  0  0  0  0           0  0  0
   -3.6241   -3.8862    0.0000 N   0  0  0  0  0  0           0  0  0
   -4.8172   -2.2448    0.0000 N   0  0  0  0  0  0           0  0  0
   -4.6379    1.1483    0.0000 C   0  0  0  0  0  0           0  0  0
    1.8138    4.8448    0.0000 C   0  0  0  0  0  0           0  0  0
    3.5690    1.8034    0.0000 O   0  0  0  0  0  0           0  0  0
   -1.6966    4.8448    0.0000 C   0  0  0  0  0  0           0  0  0
    3.5655   -4.2724    0.0000 N   0  0  0  0  0  0           0  0  0
    5.3241   -1.2310    0.0000 N   0  0  0  0  0  0           0  0  0
    0.0552    5.8552    0.0000 C   0  0  0  0  0  0           0  0  0
  1  2  1  0     0  0
  1  3  1  0     0  0
  1  4  1  0     0  0
  2  5  2  0     0  0
  2  6  1  0     0  0
  3  7  2  0     0  0
  3  8  1  0     0  0
  4  9  2  0     0  0
  4 10  1  0     0  0
  5 11  1  0     0  0
  5 12  1  0     0  0
  6 13  2  0     0  0
  6 14  1  0     0  0
  7 15  1  0     0  0
  7 16  1  0     0  0
  8 17  2  0     0  0
  9 18  1  0     0  0
 10 19  3  0     0  0
 15 20  2  0     0  0
  9 11  1  0     0  0
 12 13  1  0     0  0
 17 20  1  0     0  0
M  END
>  <IDNUMBER>
BAS 24804154

>  <BOX>
2

>  <CELL>
F1

>  <WEIGHT>
10.0

>  <MOL_WEIGHT>
268.27

>  <STRUCT_FORMULA>
C14H12N4O2

>  <VENDOR_LOT>
980918

$$$$

          08231011372D 1   1.00000     0.00000     0

 21 23  0     0  0            999 V2000
    0.3448   -0.3276    0.0000 C   0  0  0  0  0  0           0  0  0
   -0.2552    0.0103    0.0000 C   0  0  0  0  0  0           0  0  0
    0.9448    0.0103    0.0000 C   0  0  0  0  0  0           0  0  0
    0.3448   -1.0069    0.0000 C   0  0  0  0  0  0           0  0  0
   -0.2552    0.6931    0.0000 C   0  0  0  0  0  0           0  0  0
   -0.8552   -0.3276    0.0000 C   0  0  0  0  0  0           0  0  0
    0.9655    0.6931    0.0000 C   0  0  0  0  0  0           0  0  0
    1.5448   -0.3276    0.0000 C   0  0  0  0  0  0           0  0  0
   -0.2552   -1.3448    0.0000 C   0  0  0  0  0  0           0  0  0
    0.9448   -1.3448    0.0000 C   0  0  0  0  0  0           0  0  0
    0.3448    1.0310    0.0000 N   0  0  3  0  0  0           0  0  0
   -0.8552    1.0310    0.0000 O   0  0  0  0  0  0           0  0  0
   -0.8552   -1.0069    0.0000 C   0  0  0  0  0  0           0  0  0
    1.5655    1.0103    0.0000 O   0  0  0  0  0  0           0  0  0
    1.5448   -1.0069    0.0000 C   0  0  0  0  0  0           0  0  0
    0.3448    1.7310    0.0000 C   0  0  0  0  0  0           0  0  0
   -1.4828   -1.3448    0.0000 N   0  3  0  0  0  0           0  0  0
   -0.2483    2.0724    0.0000 C   0  0  0  0  0  0           0  0  0
   -1.5000   -2.0276    0.0000 O   0  0  0  0  0  0           0  0  0
   -2.0552   -0.9897    0.0000 O   0  5  0  0  0  0           0  0  0
   -0.2483    2.7552    0.0000 O   0  0  0  0  0  0           0  0  0
  1  2  1  0     0  0
  1  3  2  0     0  0
  1  4  1  0     0  0
  2  5  1  0     0  0
  2  6  2  0     0  0
  3  7  1  0     0  0
  3  8  1  0     0  0
  4  9  1  0     0  0
  4 10  2  0     0  0
  5 11  1  0     0  0
  5 12  2  0     0  0
  6 13  1  0     0  0
  7 14  2  0     0  0
  8 15  2  0     0  0
 11 16  1  0     0  0
 13 17  1  0     0  0
 16 18  1  0     0  0
 17 19  2  0     0  0
 17 20  1  0     0  0
 18 21  1  0     0  0
  7 11  1  0     0  0
  9 13  2  0     0  0
 10 15  1  0     0  0
M  CHG  2  17   1  20  -1
M  END
>  <IDNUMBER>
BAS 00430010

>  <BOX>
2

>  <CELL>
F2

>  <WEIGHT>
10.0

>  <MOL_WEIGHT>
286.24

>  <STRUCT_FORMULA>
C14H10N2O5

>  <VENDOR_LOT>
260306

$$$$

          08231011372D 1   1.00000     0.00000     0

 20 21  0     0  0            999 V2000
   -0.9241    0.4207    0.0000 N   0  0  3  0  0  0           0  0  0
   -1.3241   -0.1793    0.0000 C   0  0  0  0  0  0           0  0  0
   -1.3655    0.9828    0.0000 C   0  0  0  0  0  0           0  0  0
   -0.1862    0.4207    0.0000 C   0  0  0  0  0  0           0  0  0
   -2.0241    0.0414    0.0000 C   0  0  3  0  0  0           0  0  0
   -2.0483    0.7414    0.0000 C   0  0  0  0  0  0           0  0  0
   -1.1862    1.7069    0.0000 O   0  0  0  0  0  0           0  0  0
    0.1759   -0.1931    0.0000 C   0  0  0  0  0  0           0  0  0
   -2.6241   -0.3931    0.0000 C   0  0  0  0  0  0           0  0  0
    0.9138   -0.1931    0.0000 N   0  0  3  0  0  0           0  0  0
   -3.2862   -0.0931    0.0000 O   0  0  0  0  0  0           0  0  0
   -2.5483   -1.1310    0.0000 O   0  0  0  0  0  0           0  0  0
    1.3966   -0.7310    0.0000 C   0  0  0  0  0  0           0  0  0
    1.2759    0.4207    0.0000 C   0  0  0  0  0  0           0  0  0
    2.0517   -0.4310    0.0000 C   0  0  3  0  0  0           0  0  0
    1.9759    0.2690    0.0000 C   0  0  0  0  0  0           0  0  0
    0.9759    1.1069    0.0000 O   0  0  0  0  0  0           0  0  0
    2.6966   -0.7931    0.0000 C   0  0  0  0  0  0           0  0  0
    2.7138   -1.5310    0.0000 O   0  0  0  0  0  0           0  0  0
    3.3345   -0.4310    0.0000 O   0  0  0  0  0  0           0  0  0
  1  2  1  0     0  0
  1  3  1  0     0  0
  1  4  1  0     0  0
  2  5  1  0     0  0
  3  6  1  0     0  0
  3  7  2  0     0  0
  4  8  1  0     0  0
  5  9  1  0     0  0
  8 10  1  0     0  0
  9 11  1  0     0  0
  9 12  2  0     0  0
 10 13  1  0     0  0
 10 14  1  0     0  0
 13 15  1  0     0  0
 14 16  1  0     0  0
 14 17  2  0     0  0
 15 18  1  0     0  0
 18 19  1  0     0  0
 18 20  2  0     0  0
  5  6  1  0     0  0
 15 16  1  0     0  0
M  END
>  <IDNUMBER>
BAS 00531615

>  <BOX>
2

>  <CELL>
F3

>  <WEIGHT>
10.0

>  <MOL_WEIGHT>
284.27

>  <STRUCT_FORMULA>
C12H16N2O6

>  <VENDOR_LOT>
179643

$$$$

          08231011372D 1   1.00000     0.00000     0

 19 20  0     0  0            999 V2000
   -1.4310   -0.6103    0.0000 C   0  0  0  0  0  0           0  0  0
   -0.5310   -0.0897    0.0000 C   0  0  0  0  0  0           0  0  0
   -2.3310   -0.0897    0.0000 C   0  0  0  0  0  0           0  0  0
   -1.4310   -1.6483    0.0000 S   0  0  3  0  0  0           0  0  0
   -0.5310    0.9517    0.0000 C   0  0  0  0  0  0           0  0  0
   -2.3310    0.9517    0.0000 C   0  0  0  0  0  0           0  0  0
   -3.2310   -0.6310    0.0000 C   0  0  0  0  0  0           0  0  0
   -1.4310   -2.6897    0.0000 O   0  0  0  0  0  0           0  0  0
   -0.3897   -1.6483    0.0000 O   0  0  0  0  0  0           0  0  0
   -2.4690   -1.6483    0.0000 O   0  0  0  0  0  0           0  0  0
    0.3897    1.4897    0.0000 C   0  0  0  0  0  0           0  0  0
   -1.4310    1.4690    0.0000 C   0  0  0  0  0  0           0  0  0
    1.2897    0.9690    0.0000 C   0  0  0  0  0  0           0  0  0
    2.1897    1.4897    0.0000 C   0  0  0  0  0  0           0  0  0
    1.2897   -0.0690    0.0000 C   0  0  0  0  0  0           0  0  0
    3.0897    0.9690    0.0000 C   0  0  0  0  0  0           0  0  0
    2.1897   -0.5897    0.0000 N   0  0  0  0  0  0           0  0  0
    3.0897   -0.0690    0.0000 C   0  0  0  0  0  0           0  0  0
    4.0103    1.4897    0.0000 O   0  0  0  0  0  0           0  0  0
  1  2  1  0     0  0
  1  3  2  0     0  0
  1  4  1  0     0  0
  2  5  2  0     0  0
  3  6  1  0     0  0
  3  7  1  0     0  0
  4  8  1  0     0  0
  4  9  2  0     0  0
  4 10  2  0     0  0
  5 11  1  0     0  0
  5 12  1  0     0  0
 11 13  1  0     0  0
 13 14  2  0     0  0
 13 15  1  0     0  0
 14 16  1  0     0  0
 15 17  2  0     0  0
 16 18  2  0     0  0
 16 19  1  0     0  0
  6 12  2  0     0  0
 17 18  1  0     0  0
M  END
>  <IDNUMBER>
BAS 01416430

>  <BOX>
2

>  <CELL>
F4

>  <WEIGHT>
10.0

>  <MOL_WEIGHT>
279.31

>  <STRUCT_FORMULA>
C13H13NO4S

>  <VENDOR_LOT>
180867

$$$$

          08231011372D 1   1.00000     0.00000     0

 22 23  0     0  0            999 V2000
   -0.3207    1.2517    0.0000 C   0  0  0  0  0  0           0  0  0
    0.1483    1.8310    0.0000 C   0  0  0  0  0  0           0  0  0
   -0.0448    0.5517    0.0000 C   0  0  0  0  0  0           0  0  0
   -1.0690    1.3552    0.0000 N   0  3  0  0  0  0           0  0  0
    0.8862    1.7172    0.0000 C   0  0  0  0  0  0           0  0  0
   -0.3690    2.9759    0.0000 N   0  0  3  0  0  0           0  0  0
    0.6966    0.4414    0.0000 C   0  0  0  0  0  0           0  0  0
   -1.5310    0.7655    0.0000 O   0  0  0  0  0  0           0  0  0
   -1.3517    2.0517    0.0000 O   0  5  0  0  0  0           0  0  0
    1.1586    1.0276    0.0000 C   0  0  0  0  0  0           0  0  0
    0.0966    3.5690    0.0000 C   0  0  0  0  0  0           0  0  0
   -1.1138    3.0897    0.0000 C   0  0  0  0  0  0           0  0  0
    0.9724   -0.2586    0.0000 C   0  0  0  0  0  0           0  0  0
    0.4966   -0.8483    0.0000 C   0  0  0  0  0  0           0  0  0
    0.7724   -1.5483    0.0000 C   0  0  0  0  0  0           0  0  0
    0.3103   -2.1345    0.0000 C   0  0  0  0  0  0           0  0  0
    1.5172   -1.6552    0.0000 O   0  0  0  0  0  0           0  0  0
   -0.4310   -2.0241    0.0000 C   0  0  0  0  0  0           0  0  0
    0.5862   -2.8241    0.0000 C   0  0  0  0  0  0           0  0  0
   -0.8931   -2.6103    0.0000 C   0  0  0  0  0  0           0  0  0
    0.1172   -3.4172    0.0000 C   0  0  0  0  0  0           0  0  0
   -0.6276   -3.3103    0.0000 C   0  0  0  0  0  0           0  0  0
  1  2  2  0     0  0
  1  3  1  0     0  0
  1  4  1  0     0  0
  2  5  1  0     0  0
  2  6  1  0     0  0
  3  7  2  0     0  0
  4  8  2  0     0  0
  4  9  1  0     0  0
  5 10  2  0     0  0
  6 11  1  0     0  0
  6 12  1  0     0  0
  7 13  1  0     0  0
 13 14  2  0     0  0
 14 15  1  0     0  0
 15 16  1  0     0  0
 15 17  2  0     0  0
 16 18  2  0     0  0
 16 19  1  0     0  0
 18 20  1  0     0  0
 19 21  2  0     0  0
 20 22  2  0     0  0
  7 10  1  0     0  0
 21 22  1  0     0  0
M  CHG  2   4   1   9  -1
M  END
>  <IDNUMBER>
BAS 01357467

>  <BOX>
2

>  <CELL>
F5

>  <WEIGHT>
10.0

>  <MOL_WEIGHT>
296.32

>  <STRUCT_FORMULA>
C17H16N2O3

>  <VENDOR_LOT>
226789

$$$$

          08231011372D 1   1.00000     0.00000     0

 22 25  0     0  0            999 V2000
   -1.3931    0.3034    0.0000 C   0  0  0  0  0  0           0  0  0
   -0.8966   -0.1310    0.0000 C   0  0  0  0  0  0           0  0  0
   -2.0276   -0.0103    0.0000 C   0  0  0  0  0  0           0  0  0
   -1.2448    1.0207    0.0000 N   0  0  0  0  0  0           0  0  0
   -1.1655   -0.7793    0.0000 N   0  0  0  0  0  0           0  0  0
   -0.1793    0.0414    0.0000 N   0  0  0  0  0  0           0  0  0
   -1.8966   -0.6966    0.0000 C   0  0  0  0  0  0           0  0  0
   -2.7069    0.2414    0.0000 C   0  0  0  0  0  0           0  0  0
   -0.5586    1.2310    0.0000 N   0  0  0  0  0  0           0  0  0
   -0.0276    0.7138    0.0000 C   0  0  0  0  0  0           0  0  0
   -2.4414   -1.1586    0.0000 C   0  0  0  0  0  0           0  0  0
   -3.2655   -0.2483    0.0000 C   0  0  0  0  0  0           0  0  0
    0.6034    0.9517    0.0000 N   0  0  0  0  0  0           0  0  0
   -3.1448   -0.9586    0.0000 C   0  0  0  0  0  0           0  0  0
    1.1414    0.4690    0.0000 N   0  0  0  0  0  0           0  0  0
    1.8207    0.6897    0.0000 C   0  0  0  0  0  0           0  0  0
    2.3931    0.2138    0.0000 C   0  0  0  0  0  0           0  0  0
    3.0724    0.3897    0.0000 C   0  0  0  0  0  0           0  0  0
    2.2034   -0.4586    0.0000 C   0  0  0  0  0  0           0  0  0
    3.5931   -0.0862    0.0000 C   0  0  0  0  0  0           0  0  0
    2.7345   -0.9483    0.0000 C   0  0  0  0  0  0           0  0  0
    3.3931   -0.7862    0.0000 N   0  0  0  0  0  0           0  0  0
  1  2  1  0     0  0
  1  3  1  0     0  0
  1  4  2  0     0  0
  2  5  1  0     0  0
  2  6  2  0     0  0
  3  7  2  0     0  0
  3  8  1  0     0  0
  4  9  1  0     0  0
  6 10  1  0     0  0
  7 11  1  0     0  0
  8 12  2  0     0  0
 10 13  1  0     0  0
 11 14  2  0     0  0
 13 15  1  0     0  0
 15 16  2  0     0  0
 16 17  1  0     0  0
 17 18  1  0     0  0
 17 19  2  0     0  0
 18 20  2  0     0  0
 19 21  1  0     0  0
 20 22  1  0     0  0
  5  7  1  0     0  0
  9 10  2  0     0  0
 12 14  1  0     0  0
 21 22  2  0     0  0
M  END
>  <IDNUMBER>
BAS 00289345

>  <BOX>
2

>  <CELL>
F6

>  <WEIGHT>
10.0

>  <MOL_WEIGHT>
289.30

>  <STRUCT_FORMULA>
C15H11N7

>  <VENDOR_LOT>
23167

$$$$

          08231011372D 1   1.00000     0.00000     0

 19 22  0     0  0            999 V2000
    0.0690    0.4379    0.0000 C   0  0  3  0  0  0           0  0  0
   -0.6379    0.0241    0.0000 N   0  0  3  0  0  0           0  0  0
    0.7897    0.0241    0.0000 C   0  0  0  0  0  0           0  0  0
   -0.6379    0.8517    0.0000 C   0  0  0  0  0  0           0  0  0
    0.7828    0.8517    0.0000 C   0  0  0  0  0  0           0  0  0
   -0.6379   -0.8069    0.0000 C   0  0  0  0  0  0           0  0  0
   -2.0621    0.0138    0.0000 N   0  0  0  0  0  0           0  0  0
    0.7862   -0.8069    0.0000 C   0  0  0  0  0  0           0  0  0
    1.5000    0.4379    0.0000 C   0  0  0  0  0  0           0  0  0
   -0.6379    1.6759    0.0000 C   0  0  0  0  0  0           0  0  0
    0.7828    1.6759    0.0000 C   0  0  0  0  0  0           0  0  0
    0.0759   -1.2138    0.0000 N   0  0  0  0  0  0           0  0  0
   -1.3379   -1.2241    0.0000 N   0  0  0  0  0  0           0  0  0
   -2.0586   -0.8103    0.0000 C   0  0  0  0  0  0           0  0  0
    1.5000   -1.2138    0.0000 C   0  0  0  0  0  0           0  0  0
    2.2172    0.0241    0.0000 C   0  0  0  0  0  0           0  0  0
    0.0690    2.0897    0.0000 C   0  0  0  0  0  0           0  0  0
   -2.7724   -1.2276    0.0000 N   0  0  0  0  0  0           0  0  0
    2.2172   -0.8069    0.0000 C   0  0  0  0  0  0           0  0  0
  1  2  1  0     0  0
  1  3  1  0     0  0
  1  4  1  0     0  0
  1  5  1  0     0  0
  2  6  1  0     0  0
  2  7  1  0     0  0
  3  8  2  0     0  0
  3  9  1  0     0  0
  4 10  1  0     0  0
  5 11  1  0     0  0
  6 12  1  0     0  0
  6 13  2  0     0  0
  7 14  2  0     0  0
  8 15  1  0     0  0
  9 16  1  0     0  0
 10 17  1  0     0  0
 14 18  1  0     0  0
 15 19  1  0     0  0
  8 12  1  0     0  0
 11 17  1  0     0  0
 13 14  1  0     0  0
 16 19  1  0     0  0
M  END
>  <IDNUMBER>
BAS 04238281

>  <BOX>
2

>  <CELL>
F7

>  <WEIGHT>
10.0

>  <MOL_WEIGHT>
259.35

>  <STRUCT_FORMULA>
C14H21N5

>  <VENDOR_LOT>
394552

$$$$

          08231011372D 1   1.00000     0.00000     0

 20 22  0     0  0            999 V2000
   -0.9207   -0.2103    0.0000 C   0  0  0  0  0  0           0  0  0
    0.0966    0.1172    0.0000 N   0  0  3  0  0  0           0  0  0
   -0.9207   -1.2862    0.0000 C   0  0  0  0  0  0           0  0  0
   -1.8517    0.3310    0.0000 C   0  0  0  0  0  0           0  0  0
    0.7241   -0.7483    0.0000 C   0  0  0  0  0  0           0  0  0
    0.4448    1.1621    0.0000 C   0  0  0  0  0  0           0  0  0
    0.0966   -1.6207    0.0000 N   0  0  0  0  0  0           0  0  0
   -1.8517   -1.8310    0.0000 N   0  0  3  0  0  0           0  0  0
   -2.7897   -0.2103    0.0000 N   0  0  0  0  0  0           0  0  0
   -1.8517    1.4138    0.0000 O   0  0  0  0  0  0           0  0  0
    1.7966   -0.7483    0.0000 S   0  0  0  0  0  0           0  0  0
    1.5103    1.3897    0.0000 C   0  0  0  0  0  0           0  0  0
   -2.7897   -1.2862    0.0000 C   0  0  0  0  0  0           0  0  0
   -1.8517   -2.9103    0.0000 C   0  0  0  0  0  0           0  0  0
    2.2310    0.5897    0.0000 C   0  0  0  0  0  0           0  0  0
    1.8483    2.4138    0.0000 C   0  0  0  0  0  0           0  0  0
   -3.7414   -1.8379    0.0000 O   0  0  0  0  0  0           0  0  0
    3.2793    0.8138    0.0000 C   0  0  0  0  0  0           0  0  0
    2.9103    2.6310    0.0000 C   0  0  0  0  0  0           0  0  0
    3.6310    1.8310    0.0000 C   0  0  0  0  0  0           0  0  0
  1  2  1  0     0  0
  1  3  2  0     0  0
  1  4  1  0     0  0
  2  5  1  0     0  0
  2  6  1  0     0  0
  3  7  1  0     0  0
  3  8  1  0     0  0
  4  9  1  0     0  0
  4 10  2  0     0  0
  5 11  1  0     0  0
  6 12  1  0     0  0
  8 13  1  0     0  0
  8 14  1  0     0  0
 12 15  2  0     0  0
 12 16  1  0     0  0
 13 17  2  0     0  0
 15 18  1  0     0  0
 16 19  2  0     0  0
 18 20  2  0     0  0
  5  7  2  0     0  0
  9 13  1  0     0  0
 19 20  1  0     0  0
M  END
>  <IDNUMBER>
BAS 00288266

>  <BOX>
2

>  <CELL>
F8

>  <WEIGHT>
10.0

>  <MOL_WEIGHT>
288.33

>  <STRUCT_FORMULA>
C13H12N4O2S

>  <VENDOR_LOT>
135918

$$$$

          08231011372D 1   1.00000     0.00000     0

 22 24  0     0  0            999 V2000
   -1.1897   -1.0379    0.0000 C   0  0  0  0  0  0           0  0  0
   -0.0483   -0.3793    0.0000 C   0  0  3  0  0  0           0  0  0
   -1.1897   -2.3379    0.0000 C   0  0  0  0  0  0           0  0  0
   -2.4310   -0.6379    0.0000 C   0  0  0  0  0  0           0  0  0
   -0.0483    0.9414    0.0000 C   0  0  0  0  0  0           0  0  0
    1.0897   -1.0379    0.0000 C   0  0  0  0  0  0           0  0  0
   -0.0483   -3.0000    0.0000 O   0  0  0  0  0  0           0  0  0
   -2.4310   -2.7379    0.0000 N   0  0  0  0  0  0           0  0  0
   -3.1897   -1.6793    0.0000 N   0  0  0  0  0  0           0  0  0
   -2.8310    0.6207    0.0000 C   0  0  0  0  0  0           0  0  0
    1.0897    1.6000    0.0000 C   0  0  0  0  0  0           0  0  0
   -1.1897    1.6000    0.0000 C   0  0  0  0  0  0           0  0  0
    1.0897   -2.3379    0.0000 C   0  0  0  0  0  0           0  0  0
    2.2310   -0.3793    0.0000 C   0  0  0  0  0  0           0  0  0
   -1.9517    1.6000    0.0000 C   0  0  0  0  0  0           0  0  0
    1.0897    2.9207    0.0000 C   0  0  0  0  0  0           0  0  0
    2.2310    0.9414    0.0000 O   0  0  0  0  0  0           0  0  0
   -1.1897    2.9000    0.0000 C   0  0  0  0  0  0           0  0  0
    2.2310   -3.0000    0.0000 N   0  0  0  0  0  0           0  0  0
    3.3690    0.3000    0.0000 N   0  0  0  0  0  0           0  0  0
   -0.0483    3.5621    0.0000 C   0  0  0  0  0  0           0  0  0
    3.3690    1.5793    0.0000 C   0  0  0  0  0  0           0  0  0
  1  2  1  0     0  0
  1  3  2  0     0  0
  1  4  1  0     0  0
  2  5  1  0     0  0
  2  6  1  0     0  0
  3  7  1  0     0  0
  3  8  1  0     0  0
  4  9  2  0     0  0
  4 10  1  0     0  0
  5 11  2  0     0  0
  5 12  1  0     0  0
  6 13  2  0     0  0
  6 14  1  0     0  0
 10 15  1  0     0  0
 11 16  1  0     0  0
 11 17  1  0     0  0
 12 18  2  0     0  0
 13 19  1  0     0  0
 14 20  3  0     0  0
 16 21  2  0     0  0
 17 22  1  0     0  0
  7 13  1  0     0  0
  8  9  1  0     0  0
 18 21  1  0     0  0
M  END
>  <IDNUMBER>
BAS 02504629

>  <BOX>
2

>  <CELL>
F9

>  <WEIGHT>
10.0

>  <MOL_WEIGHT>
296.33

>  <STRUCT_FORMULA>
C16H16N4O2

>  <VENDOR_LOT>
252278

$$$$

          08231011372D 1   1.00000     0.00000     0

 15 15  0     0  0            999 V2000
   -0.4517    0.7069    0.0000 C   0  0  0  0  0  0           0  0  0
   -0.4517   -0.8034    0.0000 C   0  0  0  0  0  0           0  0  0
   -1.7586    1.4103    0.0000 C   0  0  0  0  0  0           0  0  0
    0.7621    1.4103    0.0000 C   0  0  0  0  0  0           0  0  0
   -1.7586   -1.5138    0.0000 N   0  0  0  0  0  0           0  0  0
    0.7621   -1.5138    0.0000 N   0  0  0  0  0  0           0  0  0
   -2.9690    0.7069    0.0000 N   0  0  0  0  0  0           0  0  0
   -1.7586    2.8172    0.0000 O   0  0  0  0  0  0           0  0  0
    1.9690    0.7069    0.0000 C   0  0  0  0  0  0           0  0  0
   -2.9690   -0.8034    0.0000 C   0  0  0  0  0  0           0  0  0
    1.9690   -0.8034    0.0000 C   0  0  0  0  0  0           0  0  0
    3.1759    1.4103    0.0000 C   0  0  0  0  0  0           0  0  0
   -4.1759   -1.5138    0.0000 C   0  0  0  0  0  0           0  0  0
    3.1759   -1.5138    0.0000 C   0  0  0  0  0  0           0  0  0
    4.4862   -0.7034    0.0000 O   0  0  0  0  0  0           0  0  0
  1  2  2  0     0  0
  1  3  1  0     0  0
  1  4  1  0     0  0
  2  5  1  0     0  0
  2  6  1  0     0  0
  3  7  2  0     0  0
  3  8  1  0     0  0
  4  9  1  0     0  0
  5 10  2  0     0  0
  6 11  1  0     0  0
  9 12  2  0     0  0
 10 13  1  0     0  0
 11 14  1  0     0  0
 14 15  1  0     0  0
  7 10  1  0     0  0
M  END
>  <IDNUMBER>
BAS 04879222

>  <BOX>
2

>  <CELL>
F10

>  <WEIGHT>
10.0

>  <MOL_WEIGHT>
209.25

>  <STRUCT_FORMULA>
C10H15N3O2

>  <VENDOR_LOT>
421719

$$$$

          08231011372D 1   1.00000     0.00000     0

 20 22  0     0  0            999 V2000
    0.2897    0.3759    0.0000 N   0  0  3  0  0  0           0  0  0
    1.0310    0.5345    0.0000 C   0  0  0  0  0  0           0  0  0
    0.0897   -0.3448    0.0000 C   0  0  0  0  0  0           0  0  0
   -0.3483    0.7759    0.0000 C   0  0  0  0  0  0           0  0  0
    1.5517   -0.0241    0.0000 C   0  0  0  0  0  0           0  0  0
    1.2690    1.2345    0.0000 C   0  0  0  0  0  0           0  0  0
   -0.6690   -0.3828    0.0000 C   0  0  3  0  0  0           0  0  0
    0.5690   -0.9655    0.0000 O   0  0  0  0  0  0           0  0  0
   -0.9310    0.2966    0.0000 C   0  0  0  0  0  0           0  0  0
   -0.3897    1.5345    0.0000 O   0  0  0  0  0  0           0  0  0
    2.2690    0.1345    0.0000 C   0  0  0  0  0  0           0  0  0
    1.9897    1.4172    0.0000 C   0  0  0  0  0  0           0  0  0
   -1.0828   -0.9724    0.0000 S   0  0  0  0  0  0           0  0  0
    2.5103    0.8552    0.0000 C   0  0  0  0  0  0           0  0  0
    2.7690   -0.2241    0.0000 C   0  0  0  0  0  0           0  0  0
   -1.5310   -0.9310    0.0000 C   0  0  0  0  0  0           0  0  0
   -2.1000   -1.4241    0.0000 N   0  0  0  0  0  0           0  0  0
   -1.6207   -0.3138    0.0000 N   0  0  0  0  0  0           0  0  0
   -2.7897   -1.0931    0.0000 C   0  0  0  0  0  0           0  0  0
   -2.8690   -0.4828    0.0000 N   0  0  0  0  0  0           0  0  0
  1  2  1  0     0  0
  1  3  1  0     0  0
  1  4  1  0     0  0
  2  5  1  0     0  0
  2  6  2  0     0  0
  3  7  1  0     0  0
  3  8  2  0     0  0
  4  9  1  0     0  0
  4 10  2  0     0  0
  5 11  2  0     0  0
  6 12  1  0     0  0
  7 13  1  0     0  0
 11 14  1  0     0  0
 11 15  1  0     0  0
 13 16  1  0     0  0
 16 17  1  0     0  0
 16 18  2  0     0  0
 17 19  1  0     0  0
 18 20  1  0     0  0
  7  9  1  0     0  0
 12 14  2  0     0  0
 19 20  2  0     0  0
M  END
>  <IDNUMBER>
BAS 01095028

>  <BOX>
2

>  <CELL>
F11

>  <WEIGHT>
10.0

>  <MOL_WEIGHT>
288.33

>  <STRUCT_FORMULA>
C13H12N4O2S

>  <VENDOR_LOT>
421535

$$$$

          08231011372D 1   1.00000     0.00000     0

 21 22  0     0  0            999 V2000
    1.2793   -0.5379    0.0000 C   0  0  0  0  0  0           0  0  0
    1.7172    0.0724    0.0000 C   0  0  0  0  0  0           0  0  0
    0.5276   -0.5414    0.0000 C   0  0  0  0  0  0           0  0  0
    1.7207   -1.1414    0.0000 N   0  0  0  0  0  0           0  0  0
    2.4276   -0.1517    0.0000 C   0  0  0  0  0  0           0  0  0
    1.4828    0.7828    0.0000 C   0  0  0  0  0  0           0  0  0
    0.1448    0.1103    0.0000 C   0  0  0  0  0  0           0  0  0
    0.1552   -1.1897    0.0000 C   0  0  0  0  0  0           0  0  0
    2.4310   -0.9034    0.0000 N   0  0  0  0  0  0           0  0  0
    3.0310    0.2828    0.0000 N   0  0  0  0  0  0           0  0  0
    1.2448    1.4966    0.0000 N   0  0  0  0  0  0           0  0  0
   -0.6034    0.1103    0.0000 C   0  0  0  0  0  0           0  0  0
   -0.2207   -1.8414    0.0000 N   0  0  0  0  0  0           0  0  0
   -0.9793    0.7586    0.0000 C   0  0  0  0  0  0           0  0  0
   -0.9793   -0.5414    0.0000 C   0  0  0  0  0  0           0  0  0
   -1.7310    0.7586    0.0000 C   0  0  0  0  0  0           0  0  0
   -1.7310   -0.5414    0.0000 C   0  0  0  0  0  0           0  0  0
   -2.1034    0.1000    0.0000 C   0  0  0  0  0  0           0  0  0
   -2.1034    1.4103    0.0000 O   0  0  0  0  0  0           0  0  0
   -2.8552    0.1000    0.0000 O   0  0  0  0  0  0           0  0  0
   -2.8552    1.4000    0.0000 C   0  0  0  0  0  0           0  0  0
  1  2  1  0     0  0
  1  3  1  0     0  0
  1  4  2  0     0  0
  2  5  2  0     0  0
  2  6  1  0     0  0
  3  7  2  0     0  0
  3  8  1  0     0  0
  4  9  1  0     0  0
  5 10  1  0     0  0
  6 11  3  0     0  0
  7 12  1  0     0  0
  8 13  3  0     0  0
 12 14  2  0     0  0
 12 15  1  0     0  0
 14 16  1  0     0  0
 15 17  2  0     0  0
 16 18  2  0     0  0
 16 19  1  0     0  0
 18 20  1  0     0  0
 19 21  1  0     0  0
  5  9  1  0     0  0
 17 18  1  0     0  0
M  END
>  <IDNUMBER>
BAS 00858063

>  <BOX>
2

>  <CELL>
F12

>  <WEIGHT>
10.0

>  <MOL_WEIGHT>
281.27

>  <STRUCT_FORMULA>
C14H11N5O2

>  <VENDOR_LOT>
73246

$$$$

          08231011372D 1   1.00000     0.00000     0

 18 18  0     0  0            999 V2000
   -0.1621   -0.2207    0.0000 C   0  0  0  0  0  0           0  0  0
   -0.1621    1.1793    0.0000 C   0  0  0  0  0  0           0  0  0
    1.0379   -0.9207    0.0000 C   0  0  0  0  0  0           0  0  0
   -1.4621   -0.9207    0.0000 C   0  0  0  0  0  0           0  0  0
    1.0379    1.9793    0.0000 C   0  0  0  0  0  0           0  0  0
   -1.4621    1.9793    0.0000 O   0  0  0  0  0  0           0  0  0
    2.2379   -0.2207    0.0000 C   0  0  0  0  0  0           0  0  0
   -1.4621   -2.3207    0.0000 S   0  0  0  0  0  0           0  0  0
    2.2379    1.1793    0.0000 C   0  0  0  0  0  0           0  0  0
   -1.4621    3.3793    0.0000 C   0  0  3  0  0  0           0  0  0
    3.4379   -0.9207    0.0000 C   0  0  0  0  0  0           0  0  0
   -2.6621   -3.0207    0.0000 C   0  0  0  0  0  0           0  0  0
   -0.1621    4.0793    0.0000 C   0  0  0  0  0  0           0  0  0
   -2.6621    4.0793    0.0000 C   0  0  0  0  0  0           0  0  0
    4.7379   -0.2207    0.0000 C   0  0  0  0  0  0           0  0  0
    3.4379   -2.3207    0.0000 O   0  0  0  0  0  0           0  0  0
   -2.6621   -4.4207    0.0000 N   0  0  0  0  0  0           0  0  0
   -3.8621   -2.3207    0.0000 N   0  0  0  0  0  0           0  0  0
  1  2  2  0     0  0
  1  3  1  0     0  0
  1  4  1  0     0  0
  2  5  1  0     0  0
  2  6  1  0     0  0
  3  7  2  0     0  0
  4  8  1  0     0  0
  5  9  2  0     0  0
  6 10  1  0     0  0
  7 11  1  0     0  0
  8 12  1  0     0  0
 10 13  1  0     0  0
 10 14  1  0     0  0
 11 15  1  0     0  0
 11 16  2  0     0  0
 12 17  1  0     0  0
 12 18  2  0     0  0
  7  9  1  0     0  0
M  END
>  <IDNUMBER>
BAS 02841647

>  <SALTDATA>
HCl

>  <BOX>
2

>  <CELL>
G1

>  <WEIGHT>
10.0

>  <MOL_WEIGHT>
266.36

>  <STRUCT_FORMULA>
C13H18N2O2S

>  <VENDOR_LOT>
271076

$$$$

          08231011372D 1   1.00000     0.00000     0

 22 24  0     0  0            999 V2000
    1.1276   -0.5517    0.0000 C   0  0  0  0  0  0           0  0  0
    2.0448    0.1483    0.0000 C   0  0  0  0  0  0           0  0  0
    0.0655   -0.0724    0.0000 C   0  0  0  0  0  0           0  0  0
    1.2448   -1.6862    0.0000 C   0  0  0  0  0  0           0  0  0
    3.1069   -0.3345    0.0000 N   0  0  0  0  0  0           0  0  0
    1.9276    1.3138    0.0000 N   0  0  0  0  0  0           0  0  0
   -0.8724   -0.7724    0.0000 C   0  0  0  0  0  0           0  0  0
    0.3069   -2.3724    0.0000 C   0  0  0  0  0  0           0  0  0
    4.0448    0.3483    0.0000 C   0  0  0  0  0  0           0  0  0
    2.8655    1.9862    0.0000 C   0  0  0  0  0  0           0  0  0
   -2.0345   -0.6724    0.0000 C   0  0  0  0  0  0           0  0  0
   -0.7552   -1.9138    0.0000 C   0  0  0  0  0  0           0  0  0
    3.9276    1.5138    0.0000 N   0  0  0  0  0  0           0  0  0
    5.1069   -0.1138    0.0000 N   0  0  0  0  0  0           0  0  0
    2.7448    3.1483    0.0000 N   0  0  0  0  0  0           0  0  0
   -2.1552    0.4655    0.0000 N   0  0  0  0  0  0           0  0  0
   -2.9724   -1.3517    0.0000 N   0  0  0  0  0  0           0  0  0
   -3.2172    0.9655    0.0000 C   0  0  0  0  0  0           0  0  0
   -4.0345   -0.8862    0.0000 C   0  0  0  0  0  0           0  0  0
   -4.1552    0.2655    0.0000 N   0  0  0  0  0  0           0  0  0
   -3.3345    2.1276    0.0000 N   0  0  0  0  0  0           0  0  0
   -4.9724   -1.5724    0.0000 N   0  0  0  0  0  0           0  0  0
  1  2  1  0     0  0
  1  3  2  0     0  0
  1  4  1  0     0  0
  2  5  2  0     0  0
  2  6  1  0     0  0
  3  7  1  0     0  0
  4  8  2  0     0  0
  5  9  1  0     0  0
  6 10  2  0     0  0
  7 11  1  0     0  0
  7 12  2  0     0  0
  9 13  2  0     0  0
  9 14  1  0     0  0
 10 15  1  0     0  0
 11 16  2  0     0  0
 11 17  1  0     0  0
 16 18  1  0     0  0
 17 19  2  0     0  0
 18 20  2  0     0  0
 18 21  1  0     0  0
 19 22  1  0     0  0
  8 12  1  0     0  0
 10 13  1  0     0  0
 19 20  1  0     0  0
M  END
>  <IDNUMBER>
BAS 00268888

>  <BOX>
2

>  <CELL>
G2

>  <WEIGHT>
10.0

>  <MOL_WEIGHT>
296.30

>  <STRUCT_FORMULA>
C12H12N10

>  <VENDOR_LOT>
22005

$$$$

          08231011372D 1   1.00000     0.00000     0

 18 19  0     0  0            999 V2000
    1.4931   -0.3000    0.0000 C   0  0  0  0  0  0           0  0  0
    1.0310    0.4655    0.0000 C   0  0  0  0  0  0           0  0  0
    2.3931   -0.3000    0.0000 C   0  0  0  0  0  0           0  0  0
    1.2310   -1.1621    0.0000 S   0  0  0  0  0  0           0  0  0
    0.1310    0.4655    0.0000 C   0  0  0  0  0  0           0  0  0
    2.6690   -1.1621    0.0000 N   0  0  0  0  0  0           0  0  0
    2.9517    0.4172    0.0000 O   0  0  0  0  0  0           0  0  0
    1.9517   -1.6621    0.0000 C   0  0  0  0  0  0           0  0  0
   -0.3069   -0.3000    0.0000 C   0  0  0  0  0  0           0  0  0
   -0.3069    1.2655    0.0000 C   0  0  0  0  0  0           0  0  0
    1.9690   -2.5621    0.0000 S   0  0  0  0  0  0           0  0  0
   -1.2069   -0.3000    0.0000 C   0  0  0  0  0  0           0  0  0
   -1.2069    1.2655    0.0000 C   0  0  0  0  0  0           0  0  0
   -1.6690    0.4655    0.0000 C   0  0  0  0  0  0           0  0  0
   -2.5690    0.4655    0.0000 C   0  0  0  0  0  0           0  0  0
   -3.0069    1.2379    0.0000 O   0  0  0  0  0  0           0  0  0
   -3.0069   -0.3207    0.0000 O   0  0  0  0  0  0           0  0  0
   -2.5483    2.0172    0.0000 C   0  0  0  0  0  0           0  0  0
  1  2  2  0     0  0
  1  3  1  0     0  0
  1  4  1  0     0  0
  2  5  1  0     0  0
  3  6  1  0     0  0
  3  7  2  0     0  0
  4  8  1  0     0  0
  5  9  1  0     0  0
  5 10  2  0     0  0
  8 11  2  0     0  0
  9 12  2  0     0  0
 10 13  1  0     0  0
 12 14  1  0     0  0
 14 15  1  0     0  0
 15 16  1  0     0  0
 15 17  2  0     0  0
 16 18  1  0     0  0
  6  8  1  0     0  0
 13 14  2  0     0  0
M  END
>  <IDNUMBER>
BAS 00253457

>  <BOX>
2

>  <CELL>
G3

>  <WEIGHT>
10.0

>  <MOL_WEIGHT>
279.34

>  <STRUCT_FORMULA>
C12H9NO3S2

>  <VENDOR_LOT>
167591

$$$$

          08231011372D 1   1.00000     0.00000     0

 18 19  0     0  0            999 V2000
    1.4690    0.1828    0.0000 C   0  0  3  0  0  0           0  0  0
    1.9552   -0.4793    0.0000 C   0  0  0  0  0  0           0  0  0
    0.6448    0.1828    0.0000 C   0  0  0  0  0  0           0  0  0
    1.9552    0.8586    0.0000 S   0  0  0  0  0  0           0  0  0
    2.7414   -0.2172    0.0000 N   0  0  0  0  0  0           0  0  0
    1.7414   -1.2793    0.0000 O   0  0  0  0  0  0           0  0  0
    0.2310   -0.5310    0.0000 C   0  0  0  0  0  0           0  0  0
    2.7414    0.6000    0.0000 C   0  0  0  0  0  0           0  0  0
   -0.5931   -0.5310    0.0000 N   0  0  0  0  0  0           0  0  0
    0.6448   -1.2414    0.0000 O   0  0  0  0  0  0           0  0  0
    3.3207    1.1862    0.0000 N   0  0  0  0  0  0           0  0  0
   -1.0069    0.1828    0.0000 C   0  0  0  0  0  0           0  0  0
   -1.8241    0.1828    0.0000 C   0  0  0  0  0  0           0  0  0
   -2.2310    0.8931    0.0000 C   0  0  0  0  0  0           0  0  0
   -2.2310   -0.5276    0.0000 C   0  0  0  0  0  0           0  0  0
   -3.0552    0.8931    0.0000 C   0  0  0  0  0  0           0  0  0
   -3.0448   -0.5310    0.0000 C   0  0  0  0  0  0           0  0  0
   -3.4586    0.1828    0.0000 C   0  0  0  0  0  0           0  0  0
  1  2  1  0     0  0
  1  3  1  0     0  0
  1  4  1  0     0  0
  2  5  1  0     0  0
  2  6  2  0     0  0
  3  7  1  0     0  0
  4  8  1  0     0  0
  7  9  1  0     0  0
  7 10  2  0     0  0
  8 11  2  0     0  0
  9 12  1  0     0  0
 12 13  1  0     0  0
 13 14  2  0     0  0
 13 15  1  0     0  0
 14 16  1  0     0  0
 15 17  2  0     0  0
 16 18  2  0     0  0
  5  8  1  0     0  0
 17 18  1  0     0  0
M  END
>  <IDNUMBER>
BAS 03571207

>  <BOX>
2

>  <CELL>
G4

>  <WEIGHT>
10.0

>  <MOL_WEIGHT>
263.32

>  <STRUCT_FORMULA>
C12H13N3O2S

>  <VENDOR_LOT>
396685

$$$$

          08231011372D 1   1.00000     0.00000     0

 17 18  0     0  0            999 V2000
    0.5000   -0.2241    0.0000 N   0  0  3  0  0  0           0  0  0
    1.2241    0.1759    0.0000 C   0  0  0  0  0  0           0  0  0
    0.5448   -1.0414    0.0000 C   0  0  0  0  0  0           0  0  0
   -0.2241    0.1759    0.0000 C   0  0  0  0  0  0           0  0  0
    1.2448    1.0241    0.0000 C   0  0  0  0  0  0           0  0  0
   -0.1552   -1.4759    0.0000 C   0  0  0  0  0  0           0  0  0
   -0.9379   -0.2759    0.0000 C   0  0  0  0  0  0           0  0  0
    1.9000    1.4207    0.0000 C   0  0  0  0  0  0           0  0  0
    0.5483    1.4207    0.0000 C   0  0  0  0  0  0           0  0  0
   -0.9034   -1.0793    0.0000 N   0  0  3  0  0  0           0  0  0
    1.9000    2.1966    0.0000 C   0  0  0  0  0  0           0  0  0
    0.5448    2.1966    0.0000 C   0  0  0  0  0  0           0  0  0
   -1.6000   -1.5034    0.0000 S   0  0  3  0  0  0           0  0  0
    1.2241    2.5759    0.0000 N   0  0  0  0  0  0           0  0  0
   -1.5241   -2.2759    0.0000 C   0  0  0  0  0  0           0  0  0
   -2.1034   -1.2759    0.0000 O   0  0  0  0  0  0           0  0  0
   -2.1759   -2.0310    0.0000 O   0  0  0  0  0  0           0  0  0
  1  2  1  0     0  0
  1  3  1  0     0  0
  1  4  1  0     0  0
  2  5  1  0     0  0
  3  6  1  0     0  0
  4  7  1  0     0  0
  5  8  1  0     0  0
  5  9  2  0     0  0
  6 10  1  0     0  0
  8 11  2  0     0  0
  9 12  1  0     0  0
 10 13  1  0     0  0
 11 14  1  0     0  0
 13 15  1  0     0  0
 13 16  2  0     0  0
 13 17  2  0     0  0
  7 10  1  0     0  0
 12 14  2  0     0  0
M  END
>  <IDNUMBER>
BAS 03050188

>  <SALTDATA>
(COOH)2

>  <BOX>
2

>  <CELL>
G5

>  <WEIGHT>
10.0

>  <MOL_WEIGHT>
255.34

>  <STRUCT_FORMULA>
C11H17N3O2S

>  <VENDOR_LOT>
280298

$$$$

          08231011372D 1   1.00000     0.00000     0

 18 19  0     0  0            999 V2000
    0.6379    0.2793    0.0000 C   0  0  0  0  0  0           0  0  0
    0.6379   -0.5483    0.0000 C   0  0  0  0  0  0           0  0  0
   -0.0759    0.6897    0.0000 C   0  0  0  0  0  0           0  0  0
    1.3517    0.6897    0.0000 O   0  0  0  0  0  0           0  0  0
    1.3517   -0.9586    0.0000 C   0  0  0  0  0  0           0  0  0
   -0.0759   -0.9586    0.0000 C   0  0  0  0  0  0           0  0  0
   -0.7897    0.2690    0.0000 C   0  0  0  0  0  0           0  0  0
    2.0621    0.2793    0.0000 C   0  0  0  0  0  0           0  0  0
    2.0621   -0.5483    0.0000 C   0  0  0  0  0  0           0  0  0
    1.3517   -1.7828    0.0000 C   0  0  0  0  0  0           0  0  0
   -0.7897   -0.5483    0.0000 C   0  0  0  0  0  0           0  0  0
   -1.5103    0.6897    0.0000 O   0  0  0  0  0  0           0  0  0
    2.7897    0.6897    0.0000 O   0  0  0  0  0  0           0  0  0
    2.7897   -0.9724    0.0000 C   0  0  0  0  0  0           0  0  0
   -2.2241    0.2690    0.0000 C   0  0  0  0  0  0           0  0  0
   -2.9483    0.6793    0.0000 C   0  0  0  0  0  0           0  0  0
   -3.6621    0.2655    0.0000 N   0  0  0  0  0  0           0  0  0
   -2.9552    1.5103    0.0000 O   0  0  0  0  0  0           0  0  0
  1  2  1  0     0  0
  1  3  2  0     0  0
  1  4  1  0     0  0
  2  5  1  0     0  0
  2  6  2  0     0  0
  3  7  1  0     0  0
  4  8  1  0     0  0
  5  9  2  0     0  0
  5 10  1  0     0  0
  6 11  1  0     0  0
  7 12  1  0     0  0
  8 13  2  0     0  0
  9 14  1  0     0  0
 12 15  1  0     0  0
 15 16  1  0     0  0
 16 17  1  0     0  0
 16 18  2  0     0  0
  7 11  2  0     0  0
  8  9  1  0     0  0
M  END
>  <IDNUMBER>
BAS 03149984

>  <BOX>
2

>  <CELL>
G6

>  <WEIGHT>
10.0

>  <MOL_WEIGHT>
247.25

>  <STRUCT_FORMULA>
C13H13NO4

>  <VENDOR_LOT>
297525

$$$$

          08231011372D 1   1.00000     0.00000     0

 21 22  0     0  0            999 V2000
   -1.3724   -1.0310    0.0000 C   0  0  0  0  0  0           0  0  0
   -2.2724   -0.5103    0.0000 C   0  0  0  0  0  0           0  0  0
   -0.4310   -0.4862    0.0000 C   0  0  0  0  0  0           0  0  0
   -1.3724   -2.1103    0.0000 C   0  0  0  0  0  0           0  0  0
   -3.1931   -1.0310    0.0000 C   0  0  0  0  0  0           0  0  0
   -2.2724    0.5517    0.0000 C   0  0  0  0  0  0           0  0  0
    0.4897   -1.0310    0.0000 N   0  0  0  0  0  0           0  0  0
   -0.4310    0.5690    0.0000 O   0  0  0  0  0  0           0  0  0
   -2.2724   -2.6310    0.0000 C   0  0  0  0  0  0           0  0  0
   -3.2103   -2.0862    0.0000 C   0  0  0  0  0  0           0  0  0
   -1.3552    1.0759    0.0000 O   0  0  0  0  0  0           0  0  0
   -3.1931    1.0897    0.0000 O   0  0  0  0  0  0           0  0  0
    1.4069   -0.5103    0.0000 C   0  0  0  0  0  0           0  0  0
    1.4069    0.5517    0.0000 C   0  0  0  0  0  0           0  0  0
    2.3069   -1.0310    0.0000 C   0  0  0  0  0  0           0  0  0
    2.3276    1.0897    0.0000 C   0  0  0  0  0  0           0  0  0
    3.2276   -0.5103    0.0000 C   0  0  0  0  0  0           0  0  0
    3.2448    0.5690    0.0000 C   0  0  0  0  0  0           0  0  0
    2.3276    2.1517    0.0000 C   0  0  0  0  0  0           0  0  0
    3.2448    2.6690    0.0000 O   0  0  0  0  0  0           0  0  0
    1.4069    2.6690    0.0000 O   0  0  0  0  0  0           0  0  0
  1  2  1  0     0  0
  1  3  1  0     0  0
  1  4  2  0     0  0
  2  5  2  0     0  0
  2  6  1  0     0  0
  3  7  1  0     0  0
  3  8  2  0     0  0
  4  9  1  0     0  0
  5 10  1  0     0  0
  6 11  1  0     0  0
  6 12  2  0     0  0
  7 13  1  0     0  0
 13 14  1  0     0  0
 13 15  2  0     0  0
 14 16  2  0     0  0
 15 17  1  0     0  0
 16 18  1  0     0  0
 16 19  1  0     0  0
 19 20  1  0     0  0
 19 21  2  0     0  0
  9 10  2  0     0  0
 17 18  2  0     0  0
M  END
>  <IDNUMBER>
BAS 00135811

>  <BOX>
2

>  <CELL>
G7

>  <WEIGHT>
10.0

>  <MOL_WEIGHT>
285.25

>  <STRUCT_FORMULA>
C15H11NO5

>  <VENDOR_LOT>
357700

$$$$

          08231011372D 1   1.00000     0.00000     0

 20 21  0     0  0            999 V2000
   -0.6552    0.2621    0.0000 C   0  0  3  0  0  0           0  0  0
    0.1931    0.4966    0.0000 C   0  0  0  0  0  0           0  0  0
   -0.9000   -0.6034    0.0000 C   0  0  0  0  0  0           0  0  0
   -1.3000    0.8966    0.0000 N   0  0  0  0  0  0           0  0  0
    0.8241   -0.1379    0.0000 C   0  0  0  0  0  0           0  0  0
    0.4103    1.3448    0.0000 C   0  0  0  0  0  0           0  0  0
   -1.7690   -0.8241    0.0000 C   0  0  0  0  0  0           0  0  0
   -0.2552   -1.2379    0.0000 C   0  0  0  0  0  0           0  0  0
   -2.1759    0.6621    0.0000 C   0  0  0  0  0  0           0  0  0
    1.6724    0.0828    0.0000 C   0  0  0  0  0  0           0  0  0
    1.2724    1.5828    0.0000 C   0  0  0  0  0  0           0  0  0
   -2.4138   -0.1862    0.0000 N   0  0  0  0  0  0           0  0  0
   -2.0276   -1.6897    0.0000 C   0  0  0  0  0  0           0  0  0
   -0.5000   -2.1172    0.0000 C   0  0  0  0  0  0           0  0  0
    0.3724   -1.0759    0.0000 O   0  0  0  0  0  0           0  0  0
   -2.8276    1.2759    0.0000 S   0  0  0  0  0  0           0  0  0
    1.9103    0.9448    0.0000 C   0  0  0  0  0  0           0  0  0
    2.2828   -0.5276    0.0000 O   0  0  0  0  0  0           0  0  0
    2.7448    1.1586    0.0000 O   0  0  0  0  0  0           0  0  0
    3.1310   -0.3172    0.0000 C   0  0  0  0  0  0           0  0  0
  1  2  1  0     0  0
  1  3  1  0     0  0
  1  4  1  0     0  0
  2  5  1  0     0  0
  2  6  2  0     0  0
  3  7  2  0     0  0
  3  8  1  0     0  0
  4  9  1  0     0  0
  5 10  2  0     0  0
  6 11  1  0     0  0
  7 12  1  0     0  0
  7 13  1  0     0  0
  8 14  1  0     0  0
  8 15  2  0     0  0
  9 16  2  0     0  0
 10 17  1  0     0  0
 10 18  1  0     0  0
 17 19  1  0     0  0
 18 20  1  0     0  0
  9 12  1  0     0  0
 11 17  2  0     0  0
M  END
>  <IDNUMBER>
BAS 00436646

>  <BOX>
2

>  <CELL>
G8

>  <WEIGHT>
10.0

>  <MOL_WEIGHT>
292.36

>  <STRUCT_FORMULA>
C14H16N2O3S

>  <VENDOR_LOT>
168695

$$$$

          08231011372D 1   1.00000     0.00000     0

 17 18  0     0  0            999 V2000
   -0.4828    0.5345    0.0000 C   0  0  3  0  0  0           0  0  0
   -0.4828   -0.4138    0.0000 C   0  0  0  0  0  0           0  0  0
    0.3172    1.0552    0.0000 N   0  0  0  0  0  0           0  0  0
   -1.2103    1.1069    0.0000 S   0  0  0  0  0  0           0  0  0
    0.3517   -0.8931    0.0000 C   0  0  0  0  0  0           0  0  0
   -1.2966   -0.8931    0.0000 C   0  0  0  0  0  0           0  0  0
    0.0310    1.9931    0.0000 C   0  0  3  0  0  0           0  0  0
   -0.8690    1.9931    0.0000 C   0  0  0  0  0  0           0  0  0
    0.3517   -1.8310    0.0000 C   0  0  0  0  0  0           0  0  0
   -1.2966   -1.8310    0.0000 C   0  0  0  0  0  0           0  0  0
    0.6172    2.7241    0.0000 C   0  0  0  0  0  0           0  0  0
   -0.4828   -2.3138    0.0000 C   0  0  0  0  0  0           0  0  0
    1.1552   -2.2828    0.0000 O   0  0  0  0  0  0           0  0  0
    1.5379    2.6345    0.0000 O   0  0  0  0  0  0           0  0  0
    0.2310    3.5931    0.0000 O   0  0  0  0  0  0           0  0  0
   -0.4690   -3.2655    0.0000 O   0  0  0  0  0  0           0  0  0
    2.0034   -1.9138    0.0000 C   0  0  0  0  0  0           0  0  0
  1  2  1  0     0  0
  1  3  1  0     0  0
  1  4  1  0     0  0
  2  5  1  0     0  0
  2  6  2  0     0  0
  3  7  1  0     0  0
  4  8  1  0     0  0
  5  9  2  0     0  0
  6 10  1  0     0  0
  7 11  1  0     0  0
  9 12  1  0     0  0
  9 13  1  0     0  0
 11 14  1  0     0  0
 11 15  2  0     0  0
 12 16  1  0     0  0
 13 17  1  0     0  0
  7  8  1  0     0  0
 10 12  2  0     0  0
M  END
>  <IDNUMBER>
BAS 00873814

>  <BOX>
2

>  <CELL>
G9

>  <WEIGHT>
10.0

>  <MOL_WEIGHT>
255.29

>  <STRUCT_FORMULA>
C11H13NO4S

>  <VENDOR_LOT>
36321

$$$$

          08231011372D 1   1.00000     0.00000     0

 22 25  0     0  0            999 V2000
    0.0586   -0.0345    0.0000 C   0  0  0  0  0  0           0  0  0
   -0.3897    0.2276    0.0000 C   0  0  0  0  0  0           0  0  0
    0.5103    0.2276    0.0000 C   0  0  0  0  0  0           0  0  0
    0.0586   -0.5586    0.0000 C   0  0  0  0  0  0           0  0  0
   -0.8448   -0.0345    0.0000 C   0  0  0  0  0  0           0  0  0
   -0.3897    0.7414    0.0000 C   0  0  0  0  0  0           0  0  0
    0.5103    0.7414    0.0000 C   0  0  0  0  0  0           0  0  0
    0.9724   -0.0345    0.0000 C   0  0  0  0  0  0           0  0  0
   -0.3897   -0.8103    0.0000 C   0  0  0  0  0  0           0  0  0
    0.5103   -0.8103    0.0000 C   0  0  0  0  0  0           0  0  0
   -0.8448   -0.5586    0.0000 C   0  0  0  0  0  0           0  0  0
   -1.2931    0.2276    0.0000 C   0  0  0  0  0  0           0  0  0
    0.0586    1.0069    0.0000 C   0  0  0  0  0  0           0  0  0
    0.9724    1.0069    0.0000 O   0  0  0  0  0  0           0  0  0
    0.9862   -0.5586    0.0000 C   0  0  0  0  0  0           0  0  0
   -0.3897   -1.3448    0.0000 O   0  0  0  0  0  0           0  0  0
   -1.2931   -0.8103    0.0000 C   0  0  0  0  0  0           0  0  0
   -1.7586   -0.0345    0.0000 C   0  0  0  0  0  0           0  0  0
    1.4207    0.7414    0.0000 C   0  0  0  0  0  0           0  0  0
   -1.7586   -0.5586    0.0000 C   0  0  0  0  0  0           0  0  0
    1.8862    1.0069    0.0000 C   0  0  0  0  0  0           0  0  0
    1.4103    0.2276    0.0000 O   0  0  0  0  0  0           0  0  0
  1  2  1  0     0  0
  1  3  2  0     0  0
  1  4  1  0     0  0
  2  5  1  0     0  0
  2  6  2  0     0  0
  3  7  1  0     0  0
  3  8  1  0     0  0
  4  9  1  0     0  0
  4 10  2  0     0  0
  5 11  2  0     0  0
  5 12  1  0     0  0
  6 13  1  0     0  0
  7 14  1  0     0  0
  8 15  2  0     0  0
  9 16  2  0     0  0
 11 17  1  0     0  0
 12 18  2  0     0  0
 14 19  1  0     0  0
 17 20  2  0     0  0
 19 21  1  0     0  0
 19 22  2  0     0  0
  7 13  2  0     0  0
  9 11  1  0     0  0
 10 15  1  0     0  0
 18 20  1  0     0  0
M  END
>  <IDNUMBER>
BAS 00004691

>  <BOX>
2

>  <CELL>
G10

>  <WEIGHT>
10.0

>  <MOL_WEIGHT>
288.30

>  <STRUCT_FORMULA>
C19H12O3

>  <VENDOR_LOT>
12452

$$$$

          08231011372D 1   1.00000     0.00000     0

 16 17  0     0  0            999 V2000
   -1.0793   -0.1172    0.0000 C   0  0  0  0  0  0           0  0  0
   -1.0793    0.7034    0.0000 C   0  0  0  0  0  0           0  0  0
   -0.2966   -0.3724    0.0000 N   0  0  0  0  0  0           0  0  0
   -1.7793   -0.5345    0.0000 N   0  0  0  0  0  0           0  0  0
   -0.2966    0.9448    0.0000 N   0  0  0  0  0  0           0  0  0
   -1.7793    1.1034    0.0000 C   0  0  0  0  0  0           0  0  0
    0.1655    0.3034    0.0000 C   0  0  0  0  0  0           0  0  0
   -2.4793   -0.1172    0.0000 C   0  0  0  0  0  0           0  0  0
   -2.4793    0.7034    0.0000 N   0  0  0  0  0  0           0  0  0
   -1.7966    1.9276    0.0000 N   0  0  0  0  0  0           0  0  0
    0.9828    0.3034    0.0000 S   0  0  0  0  0  0           0  0  0
    1.4034   -0.3966    0.0000 C   0  0  0  0  0  0           0  0  0
    2.2207   -0.3966    0.0000 C   0  0  0  0  0  0           0  0  0
    2.6207   -1.1172    0.0000 C   0  0  0  0  0  0           0  0  0
    2.2207   -1.8345    0.0000 O   0  0  0  0  0  0           0  0  0
    3.4448   -1.1172    0.0000 O   0  0  0  0  0  0           0  0  0
  1  2  2  0     0  0
  1  3  1  0     0  0
  1  4  1  0     0  0
  2  5  1  0     0  0
  2  6  1  0     0  0
  3  7  1  0     0  0
  4  8  2  0     0  0
  6  9  2  0     0  0
  6 10  1  0     0  0
  7 11  1  0     0  0
 11 12  1  0     0  0
 12 13  1  0     0  0
 13 14  1  0     0  0
 14 15  1  0     0  0
 14 16  2  0     0  0
  5  7  2  0     0  0
  8  9  1  0     0  0
M  END
>  <IDNUMBER>
BAS 00161952

>  <BOX>
2

>  <CELL>
G11

>  <WEIGHT>
10.0

>  <MOL_WEIGHT>
239.26

>  <STRUCT_FORMULA>
C8H9N5O2S

>  <VENDOR_LOT>
318678

$$$$

          08231011372D 1   1.00000     0.00000     0

 19 20  0     0  0            999 V2000
    0.4655    0.1931    0.0000 C   0  0  3  0  0  0           0  0  0
    0.6862    0.9793    0.0000 C   0  0  0  0  0  0           0  0  0
   -0.2448   -0.2172    0.0000 C   0  0  0  0  0  0           0  0  0
    1.1621   -0.2655    0.0000 N   0  0  3  0  0  0           0  0  0
    1.5103    1.0207    0.0000 C   0  0  0  0  0  0           0  0  0
   -0.0345    1.3931    0.0000 C   0  0  0  0  0  0           0  0  0
   -0.9586    0.2034    0.0000 C   0  0  0  0  0  0           0  0  0
   -0.2552   -1.0414    0.0000 C   0  0  0  0  0  0           0  0  0
    1.8034    0.2552    0.0000 C   0  0  0  0  0  0           0  0  0
    1.2000   -1.0931    0.0000 C   0  0  0  0  0  0           0  0  0
    1.9621    1.7172    0.0000 O   0  0  0  0  0  0           0  0  0
   -0.0345    2.2172    0.0000 C   0  0  0  0  0  0           0  0  0
   -0.7448    0.9793    0.0000 O   0  0  0  0  0  0           0  0  0
   -1.6724   -0.2034    0.0000 C   0  0  0  0  0  0           0  0  0
   -0.9621   -1.4448    0.0000 C   0  0  0  0  0  0           0  0  0
    2.6000    0.0345    0.0000 O   0  0  0  0  0  0           0  0  0
   -1.6828   -1.0276    0.0000 C   0  0  0  0  0  0           0  0  0
   -2.3966   -1.4345    0.0000 O   0  0  0  0  0  0           0  0  0
   -2.4000   -2.2586    0.0000 C   0  0  0  0  0  0           0  0  0
  1  2  1  0     0  0
  1  3  1  0     0  0
  1  4  1  0     0  0
  2  5  2  0     0  0
  2  6  1  0     0  0
  3  7  2  0     0  0
  3  8  1  0     0  0
  4  9  1  0     0  0
  4 10  1  0     0  0
  5 11  1  0     0  0
  6 12  1  0     0  0
  6 13  2  0     0  0
  7 14  1  0     0  0
  8 15  2  0     0  0
  9 16  2  0     0  0
 14 17  2  0     0  0
 17 18  1  0     0  0
 18 19  1  0     0  0
  5  9  1  0     0  0
 15 17  1  0     0  0
M  END
>  <IDNUMBER>
BAS 00732794

>  <BOX>
2

>  <CELL>
G12

>  <WEIGHT>
10.0

>  <MOL_WEIGHT>
261.28

>  <STRUCT_FORMULA>
C14H15NO4

>  <VENDOR_LOT>
94465

$$$$

          08231011372D 1   1.00000     0.00000     0

 19 20  0     0  0            999 V2000
   -0.1103   -0.3172    0.0000 C   0  0  3  0  0  0           0  0  0
   -0.1103    0.4828    0.0000 C   0  0  0  0  0  0           0  0  0
    0.5897   -0.7172    0.0000 C   0  0  0  0  0  0           0  0  0
   -0.8103   -0.7345    0.0000 C   0  0  0  0  0  0           0  0  0
    0.5897    0.8828    0.0000 S   0  0  0  0  0  0           0  0  0
   -0.7103    1.0414    0.0000 C   0  0  0  0  0  0           0  0  0
    0.5897   -1.5345    0.0000 C   0  0  0  0  0  0           0  0  0
    1.3103   -0.3172    0.0000 C   0  0  0  0  0  0           0  0  0
   -0.8103   -1.5172    0.0000 C   0  0  0  0  0  0           0  0  0
   -1.5276   -0.3345    0.0000 C   0  0  0  0  0  0           0  0  0
    0.4103    1.6828    0.0000 C   0  0  0  0  0  0           0  0  0
   -0.3724    1.7655    0.0000 C   0  0  0  0  0  0           0  0  0
   -0.1103   -1.9345    0.0000 S   0  0  0  0  0  0           0  0  0
    1.2897   -1.9586    0.0000 N   0  0  0  0  0  0           0  0  0
    2.0276    0.0828    0.0000 N   0  0  0  0  0  0           0  0  0
   -1.5276   -1.9172    0.0000 N   0  0  0  0  0  0           0  0  0
   -2.2483    0.0414    0.0000 N   0  0  0  0  0  0           0  0  0
    1.0103    2.2931    0.0000 C   0  0  0  0  0  0           0  0  0
    0.5241    2.9931    0.0000 C   0  0  0  0  0  0           0  0  0
  1  2  1  0     0  0
  1  3  1  0     0  0
  1  4  1  0     0  0
  2  5  1  0     0  0
  2  6  2  0     0  0
  3  7  2  0     0  0
  3  8  1  0     0  0
  4  9  2  0     0  0
  4 10  1  0     0  0
  5 11  1  0     0  0
  6 12  1  0     0  0
  7 13  1  0     0  0
  7 14  1  0     0  0
  8 15  3  0     0  0
  9 16  1  0     0  0
 10 17  3  0     0  0
 11 18  1  0     0  0
 18 19  1  0     0  0
  9 13  1  0     0  0
 11 12  2  0     0  0
M  END
>  <IDNUMBER>
BAS 00673048

>  <BOX>
2

>  <CELL>
H1

>  <WEIGHT>
10.0

>  <MOL_WEIGHT>
288.40

>  <STRUCT_FORMULA>
C13H12N4S2

>  <VENDOR_LOT>
19595

$$$$

          08231011372D 1   1.00000     0.00000     0

 19 20  0     0  0            999 V2000
    0.6448    0.2034    0.0000 C   0  0  0  0  0  0           0  0  0
    0.6448   -0.6345    0.0000 C   0  0  0  0  0  0           0  0  0
   -0.0724    0.6138    0.0000 C   0  0  0  0  0  0           0  0  0
    1.3724    0.6138    0.0000 O   0  0  0  0  0  0           0  0  0
    1.3724   -1.0483    0.0000 C   0  0  0  0  0  0           0  0  0
   -0.0724   -1.0483    0.0000 C   0  0  0  0  0  0           0  0  0
   -0.7966    0.1897    0.0000 C   0  0  0  0  0  0           0  0  0
   -0.0724    1.4517    0.0000 C   0  0  0  0  0  0           0  0  0
    2.0931    0.2034    0.0000 C   0  0  0  0  0  0           0  0  0
    2.0931   -0.6345    0.0000 C   0  0  0  0  0  0           0  0  0
    1.3724   -1.8862    0.0000 C   0  0  0  0  0  0           0  0  0
   -0.7966   -0.6345    0.0000 C   0  0  0  0  0  0           0  0  0
   -1.5276    0.6207    0.0000 O   0  0  0  0  0  0           0  0  0
    2.8207    0.6138    0.0000 O   0  0  0  0  0  0           0  0  0
    2.8207   -1.0586    0.0000 C   0  0  0  0  0  0           0  0  0
   -2.2448    0.1897    0.0000 C   0  0  0  0  0  0           0  0  0
   -2.9793    0.6069    0.0000 C   0  0  0  0  0  0           0  0  0
   -3.6931    0.1897    0.0000 N   0  0  0  0  0  0           0  0  0
   -2.9793    1.4448    0.0000 O   0  0  0  0  0  0           0  0  0
  1  2  1  0     0  0
  1  3  2  0     0  0
  1  4  1  0     0  0
  2  5  1  0     0  0
  2  6  2  0     0  0
  3  7  1  0     0  0
  3  8  1  0     0  0
  4  9  1  0     0  0
  5 10  2  0     0  0
  5 11  1  0     0  0
  6 12  1  0     0  0
  7 13  1  0     0  0
  9 14  2  0     0  0
 10 15  1  0     0  0
 13 16  1  0     0  0
 16 17  1  0     0  0
 17 18  1  0     0  0
 17 19  2  0     0  0
  7 12  2  0     0  0
  9 10  1  0     0  0
M  END
>  <IDNUMBER>
BAS 03149985

>  <BOX>
2

>  <CELL>
H2

>  <WEIGHT>
10.0

>  <MOL_WEIGHT>
261.28

>  <STRUCT_FORMULA>
C14H15NO4

>  <VENDOR_LOT>
297527

$$$$

          08231011372D 1   1.00000     0.00000     0

 21 22  0     0  0            999 V2000
   -1.0966   -0.6655    0.0000 C   0  0  0  0  0  0           0  0  0
   -0.2724   -0.7483    0.0000 C   0  0  0  0  0  0           0  0  0
   -1.4345    0.0897    0.0000 C   0  0  0  0  0  0           0  0  0
   -1.5724   -1.3276    0.0000 C   0  0  0  0  0  0           0  0  0
    0.2103   -0.0759    0.0000 C   0  0  0  0  0  0           0  0  0
   -2.2483    0.1724    0.0000 N   0  0  0  0  0  0           0  0  0
   -0.9483    0.7621    0.0000 O   0  0  0  0  0  0           0  0  0
   -2.3966   -1.2483    0.0000 N   0  0  0  0  0  0           0  0  0
   -1.2345   -2.0793    0.0000 O   0  0  0  0  0  0           0  0  0
    1.0276   -0.0759    0.0000 C   0  0  0  0  0  0           0  0  0
   -0.0517    0.7034    0.0000 C   0  0  0  0  0  0           0  0  0
   -2.7345   -0.4897    0.0000 C   0  0  0  0  0  0           0  0  0
    1.2862    0.7103    0.0000 N   0  0  3  0  0  0           0  0  0
    1.5138   -0.7379    0.0000 C   0  0  0  0  0  0           0  0  0
    0.6138    1.1966    0.0000 C   0  0  0  0  0  0           0  0  0
   -3.5517   -0.4103    0.0000 O   0  0  0  0  0  0           0  0  0
    2.0655    0.9724    0.0000 C   0  0  0  0  0  0           0  0  0
    0.6103    2.0241    0.0000 C   0  0  0  0  0  0           0  0  0
    2.6759    0.4241    0.0000 C   0  0  0  0  0  0           0  0  0
    3.4655    0.6759    0.0000 O   0  0  0  0  0  0           0  0  0
    4.0759    0.1276    0.0000 C   0  0  0  0  0  0           0  0  0
  1  2  2  0     0  0
  1  3  1  0     0  0
  1  4  1  0     0  0
  2  5  1  0     0  0
  3  6  1  0     0  0
  3  7  2  0     0  0
  4  8  1  0     0  0
  4  9  2  0     0  0
  5 10  2  0     0  0
  5 11  1  0     0  0
  6 12  1  0     0  0
 10 13  1  0     0  0
 10 14  1  0     0  0
 11 15  2  0     0  0
 12 16  2  0     0  0
 13 17  1  0     0  0
 15 18  1  0     0  0
 17 19  1  0     0  0
 19 20  1  0     0  0
 20 21  1  0     0  0
  8 12  1  0     0  0
 13 15  1  0     0  0
M  END
>  <IDNUMBER>
BAS 03152206

>  <BOX>
2

>  <CELL>
H3

>  <WEIGHT>
10.0

>  <MOL_WEIGHT>
291.31

>  <STRUCT_FORMULA>
C14H17N3O4

>  <VENDOR_LOT>
294228

$$$$

          08231011372D 1   1.00000     0.00000     0

 20 21  0     0  0            999 V2000
   -0.9586    0.4000    0.0000 C   0  0  0  0  0  0           0  0  0
   -0.9586   -0.6414    0.0000 C   0  0  0  0  0  0           0  0  0
    0.0138    0.7207    0.0000 N   0  0  3  0  0  0           0  0  0
   -1.8586    0.9207    0.0000 C   0  0  0  0  0  0           0  0  0
    0.0138   -0.9621    0.0000 N   0  0  0  0  0  0           0  0  0
   -1.8586   -1.1621    0.0000 N   0  0  3  0  0  0           0  0  0
    0.6138   -0.1138    0.0000 C   0  0  0  0  0  0           0  0  0
    0.3414    1.7207    0.0000 C   0  0  0  0  0  0           0  0  0
   -2.7586    0.4000    0.0000 N   0  0  0  0  0  0           0  0  0
   -1.8586    1.9586    0.0000 O   0  0  0  0  0  0           0  0  0
   -2.7586   -0.6414    0.0000 C   0  0  0  0  0  0           0  0  0
   -1.8586   -2.2000    0.0000 C   0  0  0  0  0  0           0  0  0
    1.6621   -0.1000    0.0000 S   0  0  0  0  0  0           0  0  0
    1.3621    1.9483    0.0000 C   0  0  0  0  0  0           0  0  0
   -3.6724   -1.1690    0.0000 O   0  0  0  0  0  0           0  0  0
    2.1759   -1.0000    0.0000 C   0  0  0  0  0  0           0  0  0
    1.6759    2.9379    0.0000 C   0  0  0  0  0  0           0  0  0
    3.2138   -1.0000    0.0000 C   0  0  0  0  0  0           0  0  0
    3.7414   -1.9000    0.0000 O   0  0  0  0  0  0           0  0  0
    3.7414   -0.1000    0.0000 O   0  0  0  0  0  0           0  0  0
  1  2  2  0     0  0
  1  3  1  0     0  0
  1  4  1  0     0  0
  2  5  1  0     0  0
  2  6  1  0     0  0
  3  7  1  0     0  0
  3  8  1  0     0  0
  4  9  1  0     0  0
  4 10  2  0     0  0
  6 11  1  0     0  0
  6 12  1  0     0  0
  7 13  1  0     0  0
  8 14  1  0     0  0
 11 15  2  0     0  0
 13 16  1  0     0  0
 14 17  2  0     0  0
 16 18  1  0     0  0
 18 19  1  0     0  0
 18 20  2  0     0  0
  5  7  2  0     0  0
  9 11  1  0     0  0
M  END
>  <IDNUMBER>
BAS 00288287

>  <BOX>
2

>  <CELL>
H4

>  <WEIGHT>
10.0

>  <MOL_WEIGHT>
296.31

>  <STRUCT_FORMULA>
C11H12N4O4S

>  <VENDOR_LOT>
39559

$$$$

          08231011372D 1   1.00000     0.00000     0

 18 20  0     0  0            999 V2000
   -0.2379   -0.3172    0.0000 N   0  0  3  0  0  0           0  0  0
   -1.0103   -0.5793    0.0000 C   0  0  0  0  0  0           0  0  0
    0.2621   -0.9862    0.0000 C   0  0  0  0  0  0           0  0  0
    0.1655    0.4000    0.0000 C   0  0  0  0  0  0           0  0  0
   -1.0103   -1.4034    0.0000 C   0  0  0  0  0  0           0  0  0
   -1.7241   -0.1655    0.0000 C   0  0  0  0  0  0           0  0  0
   -0.2207   -1.6621    0.0000 N   0  0  0  0  0  0           0  0  0
    1.0586   -0.7276    0.0000 N   0  0  0  0  0  0           0  0  0
    0.9655    0.1897    0.0000 N   0  0  0  0  0  0           0  0  0
   -0.1517    1.1621    0.0000 S   0  0  0  0  0  0           0  0  0
   -1.7241   -1.8207    0.0000 C   0  0  0  0  0  0           0  0  0
   -2.4379   -0.5793    0.0000 C   0  0  0  0  0  0           0  0  0
    0.5621    1.5759    0.0000 C   0  0  0  0  0  0           0  0  0
   -2.4379   -1.4069    0.0000 C   0  0  0  0  0  0           0  0  0
    1.2759    1.1621    0.0000 C   0  0  0  0  0  0           0  0  0
    1.9862    1.5759    0.0000 C   0  0  0  0  0  0           0  0  0
    2.7000    1.1724    0.0000 O   0  0  0  0  0  0           0  0  0
    1.9828    2.4034    0.0000 O   0  0  0  0  0  0           0  0  0
  1  2  1  0     0  0
  1  3  1  0     0  0
  1  4  1  0     0  0
  2  5  1  0     0  0
  2  6  2  0     0  0
  3  7  1  0     0  0
  3  8  2  0     0  0
  4  9  2  0     0  0
  4 10  1  0     0  0
  5 11  2  0     0  0
  6 12  1  0     0  0
 10 13  1  0     0  0
 11 14  1  0     0  0
 13 15  1  0     0  0
 15 16  1  0     0  0
 16 17  1  0     0  0
 16 18  2  0     0  0
  5  7  1  0     0  0
  8  9  1  0     0  0
 12 14  2  0     0  0
M  END
>  <IDNUMBER>
BAS 05399607

>  <BOX>
2

>  <CELL>
H5

>  <WEIGHT>
10.0

>  <MOL_WEIGHT>
262.29

>  <STRUCT_FORMULA>
C11H10N4O2S

>  <VENDOR_LOT>
429311

$$$$

          08231011372D 1   1.00000     0.00000     0

 20 21  0     0  0            999 V2000
    2.8034   -0.1724    0.0000 C   0  0  0  0  0  0           0  0  0
    2.2793    0.7276    0.0000 C   0  0  0  0  0  0           0  0  0
    2.2759   -1.0586    0.0000 C   0  0  0  0  0  0           0  0  0
    3.8552   -0.1724    0.0000 S   0  0  3  0  0  0           0  0  0
    1.2310    0.7276    0.0000 C   0  0  0  0  0  0           0  0  0
    1.2310   -1.0586    0.0000 C   0  0  0  0  0  0           0  0  0
    5.0793   -0.1724    0.0000 N   0  0  0  0  0  0           0  0  0
    3.8552   -1.1103    0.0000 O   0  0  0  0  0  0           0  0  0
    3.8552    0.7724    0.0000 O   0  0  0  0  0  0           0  0  0
    0.7241   -0.1724    0.0000 C   0  0  0  0  0  0           0  0  0
   -0.3069   -0.1724    0.0000 N   0  0  0  0  0  0           0  0  0
   -0.8241    0.7276    0.0000 C   0  0  0  0  0  0           0  0  0
   -1.8759    0.7276    0.0000 C   0  0  0  0  0  0           0  0  0
   -0.3207    1.6276    0.0000 O   0  0  0  0  0  0           0  0  0
   -2.3862   -0.1897    0.0000 C   0  0  0  0  0  0           0  0  0
   -3.4069   -0.1897    0.0000 C   0  0  0  0  0  0           0  0  0
   -4.0207    0.6276    0.0000 C   0  0  0  0  0  0           0  0  0
   -4.0241   -1.0379    0.0000 O   0  0  0  0  0  0           0  0  0
   -5.0207    0.2897    0.0000 C   0  0  0  0  0  0           0  0  0
   -4.9966   -0.7207    0.0000 C   0  0  0  0  0  0           0  0  0
  1  2  2  0     0  0
  1  3  1  0     0  0
  1  4  1  0     0  0
  2  5  1  0     0  0
  3  6  2  0     0  0
  4  7  1  0     0  0
  4  8  2  0     0  0
  4  9  2  0     0  0
  5 10  2  0     0  0
 10 11  1  0     0  0
 11 12  1  0     0  0
 12 13  1  0     0  0
 12 14  2  0     0  0
 13 15  2  0     0  0
 15 16  1  0     0  0
 16 17  2  0     0  0
 16 18  1  0     0  0
 17 19  1  0     0  0
 18 20  1  0     0  0
  6 10  1  0     0  0
 19 20  2  0     0  0
M  END
>  <IDNUMBER>
BAS 04199407

>  <BOX>
2

>  <CELL>
H6

>  <WEIGHT>
10.0

>  <MOL_WEIGHT>
292.31

>  <STRUCT_FORMULA>
C13H12N2O4S

>  <VENDOR_LOT>
412957

$$$$

          08231011372D 1   1.00000     0.00000     0

 20 22  0     0  0            999 V2000
   -0.4655    0.2793    0.0000 C   0  0  0  0  0  0           0  0  0
   -1.2172    0.2793    0.0000 C   0  0  0  0  0  0           0  0  0
   -0.2345    0.9966    0.0000 N   0  0  3  0  0  0           0  0  0
   -0.0897   -0.3690    0.0000 C   0  0  0  0  0  0           0  0  0
   -1.5897   -0.3690    0.0000 N   0  0  3  0  0  0           0  0  0
   -1.4448    0.9966    0.0000 N   0  0  0  0  0  0           0  0  0
    0.4793    1.2241    0.0000 C   0  0  0  0  0  0           0  0  0
   -0.8414    1.4310    0.0000 C   0  0  0  0  0  0           0  0  0
   -0.4655   -1.0172    0.0000 N   0  0  3  0  0  0           0  0  0
    0.6586   -0.3690    0.0000 O   0  0  0  0  0  0           0  0  0
   -1.2172   -1.0172    0.0000 C   0  0  0  0  0  0           0  0  0
   -2.3414   -0.3690    0.0000 C   0  0  0  0  0  0           0  0  0
    1.0379    0.7241    0.0000 C   0  0  0  0  0  0           0  0  0
   -0.0897   -1.6690    0.0000 C   0  0  0  0  0  0           0  0  0
   -1.5897   -1.6690    0.0000 O   0  0  0  0  0  0           0  0  0
    1.7724    0.8793    0.0000 S   0  0  0  0  0  0           0  0  0
    0.9586   -0.0207    0.0000 N   0  0  0  0  0  0           0  0  0
    2.1448    0.2276    0.0000 C   0  0  0  0  0  0           0  0  0
    1.6448   -0.3241    0.0000 N   0  0  0  0  0  0           0  0  0
    2.8931    0.1517    0.0000 N   0  0  0  0  0  0           0  0  0
  1  2  2  0     0  0
  1  3  1  0     0  0
  1  4  1  0     0  0
  2  5  1  0     0  0
  2  6  1  0     0  0
  3  7  1  0     0  0
  3  8  1  0     0  0
  4  9  1  0     0  0
  4 10  2  0     0  0
  5 11  1  0     0  0
  5 12  1  0     0  0
  7 13  1  0     0  0
  9 14  1  0     0  0
 11 15  2  0     0  0
 13 16  1  0     0  0
 13 17  2  0     0  0
 16 18  1  0     0  0
 17 19  1  0     0  0
 18 20  1  0     0  0
  6  8  2  0     0  0
  9 11  1  0     0  0
 18 19  2  0     0  0
M  END
>  <IDNUMBER>
BAS 04303559

>  <BOX>
2

>  <CELL>
H7

>  <WEIGHT>
10.0

>  <MOL_WEIGHT>
293.31

>  <STRUCT_FORMULA>
C10H11N7O2S

>  <VENDOR_LOT>
412987

$$$$

          08231011372D 1   1.00000     0.00000     0

 18 19  0     0  0            999 V2000
    0.6862   -0.3276    0.0000 C   0  0  0  0  0  0           0  0  0
    0.6862    0.5724    0.0000 C   0  0  0  0  0  0           0  0  0
   -0.0690   -0.7655    0.0000 C   0  0  0  0  0  0           0  0  0
    1.5103   -0.5897    0.0000 N   0  0  0  0  0  0           0  0  0
   -0.0690    1.0103    0.0000 C   0  0  0  0  0  0           0  0  0
    1.5103    0.8345    0.0000 N   0  0  0  0  0  0           0  0  0
   -0.8310   -0.3276    0.0000 C   0  0  0  0  0  0           0  0  0
   -0.0690   -1.6483    0.0000 N   0  3  0  0  0  0           0  0  0
    2.0103    0.1345    0.0000 C   0  0  0  0  0  0           0  0  0
   -0.8310    0.5724    0.0000 C   0  0  0  0  0  0           0  0  0
   -0.0690    1.8897    0.0000 N   0  0  0  0  0  0           0  0  0
   -1.6138   -0.7655    0.0000 N   0  0  0  0  0  0           0  0  0
   -0.8310   -2.0897    0.0000 O   0  0  0  0  0  0           0  0  0
    0.6862   -2.0897    0.0000 O   0  5  0  0  0  0           0  0  0
    2.8862    0.1345    0.0000 O   0  0  0  0  0  0           0  0  0
   -1.6138    1.0103    0.0000 N   0  3  0  0  0  0           0  0  0
   -1.6138    1.8897    0.0000 O   0  0  0  0  0  0           0  0  0
   -2.3690    0.5724    0.0000 O   0  5  0  0  0  0           0  0  0
  1  2  2  0     0  0
  1  3  1  0     0  0
  1  4  1  0     0  0
  2  5  1  0     0  0
  2  6  1  0     0  0
  3  7  2  0     0  0
  3  8  1  0     0  0
  4  9  1  0     0  0
  5 10  2  0     0  0
  5 11  1  0     0  0
  7 12  1  0     0  0
  8 13  2  0     0  0
  8 14  1  0     0  0
  9 15  2  0     0  0
 10 16  1  0     0  0
 16 17  2  0     0  0
 16 18  1  0     0  0
  6  9  1  0     0  0
  7 10  1  0     0  0
M  CHG  4   8   1  14  -1  16   1  18  -1
M  END
>  <IDNUMBER>
BAS 00174419

>  <BOX>
2

>  <CELL>
H8

>  <WEIGHT>
10.0

>  <MOL_WEIGHT>
254.16

>  <STRUCT_FORMULA>
C7H6N6O5

>  <VENDOR_LOT>
55770

$$$$

          08231011372D 1   1.00000     0.00000     0

 21 23  0     0  0            999 V2000
   -0.4069    0.0690    0.0000 C   0  0  0  0  0  0           0  0  0
   -0.0310    0.1931    0.0000 N   0  0  3  0  0  0           0  0  0
   -0.4069   -0.3517    0.0000 C   0  0  0  0  0  0           0  0  0
   -0.7690    0.2931    0.0000 C   0  0  0  0  0  0           0  0  0
    0.2138   -0.1310    0.0000 C   0  0  0  0  0  0           0  0  0
    0.1138    0.5931    0.0000 C   0  0  0  0  0  0           0  0  0
   -0.0310   -0.4690    0.0000 N   0  0  0  0  0  0           0  0  0
   -0.7690   -0.5690    0.0000 N   0  0  3  0  0  0           0  0  0
   -1.1310    0.0690    0.0000 N   0  0  0  0  0  0           0  0  0
   -0.7690    0.7103    0.0000 O   0  0  0  0  0  0           0  0  0
    0.6138   -0.0897    0.0000 N   0  0  3  0  0  0           0  0  0
    0.5310    0.6690    0.0000 C   0  0  0  0  0  0           0  0  0
   -1.1310   -0.3517    0.0000 C   0  0  0  0  0  0           0  0  0
   -0.7690   -0.9897    0.0000 C   0  0  0  0  0  0           0  0  0
    0.8517   -0.4310    0.0000 C   0  0  0  0  0  0           0  0  0
    0.7931    0.3103    0.0000 C   0  0  0  0  0  0           0  0  0
    0.6690    1.0690    0.0000 C   0  0  0  0  0  0           0  0  0
   -1.5069   -0.5690    0.0000 O   0  0  0  0  0  0           0  0  0
    1.2690   -0.3897    0.0000 C   0  0  0  0  0  0           0  0  0
    1.2138    0.3483    0.0000 C   0  0  0  0  0  0           0  0  0
    1.4517    0.0103    0.0000 N   0  0  0  0  0  0           0  0  0
  1  2  1  0     0  0
  1  3  2  0     0  0
  1  4  1  0     0  0
  2  5  1  0     0  0
  2  6  1  0     0  0
  3  7  1  0     0  0
  3  8  1  0     0  0
  4  9  1  0     0  0
  4 10  2  0     0  0
  5 11  1  0     0  0
  6 12  1  0     0  0
  8 13  1  0     0  0
  8 14  1  0     0  0
 11 15  1  0     0  0
 11 16  1  0     0  0
 12 17  2  0     0  0
 13 18  2  0     0  0
 15 19  1  0     0  0
 16 20  1  0     0  0
 19 21  1  0     0  0
  5  7  2  0     0  0
  9 13  1  0     0  0
 20 21  1  0     0  0
M  END
>  <IDNUMBER>
BAS 00363935

>  <BOX>
2

>  <CELL>
H9

>  <WEIGHT>
10.0

>  <MOL_WEIGHT>
290.33

>  <STRUCT_FORMULA>
C13H18N6O2

>  <VENDOR_LOT>
32517

$$$$

          08231011372D 1   1.00000     0.00000     0

 21 22  0     0  0            999 V2000
   -0.3621    0.0586    0.0000 C   0  0  3  0  0  0           0  0  0
   -0.1414   -0.7379    0.0000 N   0  0  3  0  0  0           0  0  0
   -1.1862    0.0931    0.0000 C   0  0  0  0  0  0           0  0  0
    0.1517    0.7034    0.0000 C   0  0  0  0  0  0           0  0  0
   -0.8310   -1.1931    0.0000 C   0  0  0  0  0  0           0  0  0
    0.5690   -1.1448    0.0000 C   0  0  0  0  0  0           0  0  0
   -1.4759   -0.6793    0.0000 C   0  0  0  0  0  0           0  0  0
   -1.6448    0.7828    0.0000 C   0  0  0  0  0  0           0  0  0
    0.9690    0.5759    0.0000 C   0  0  0  0  0  0           0  0  0
   -0.1517    1.4655    0.0000 C   0  0  0  0  0  0           0  0  0
   -0.8690   -2.0172    0.0000 O   0  0  0  0  0  0           0  0  0
    1.2793   -0.7345    0.0000 C   0  0  0  0  0  0           0  0  0
   -2.2690   -0.9000    0.0000 O   0  0  0  0  0  0           0  0  0
   -2.4690    0.7310    0.0000 C   0  0  0  0  0  0           0  0  0
   -1.2759    1.5207    0.0000 O   0  0  0  0  0  0           0  0  0
    1.4828    1.2207    0.0000 C   0  0  0  0  0  0           0  0  0
    0.3586    2.1103    0.0000 C   0  0  0  0  0  0           0  0  0
    1.9931   -1.1448    0.0000 C   0  0  0  0  0  0           0  0  0
    1.1793    1.9897    0.0000 C   0  0  0  0  0  0           0  0  0
    2.7069   -0.7345    0.0000 O   0  0  0  0  0  0           0  0  0
    1.9897   -1.9724    0.0000 O   0  0  0  0  0  0           0  0  0
  1  2  1  0     0  0
  1  3  1  0     0  0
  1  4  1  0     0  0
  2  5  1  0     0  0
  2  6  1  0     0  0
  3  7  2  0     0  0
  3  8  1  0     0  0
  4  9  2  0     0  0
  4 10  1  0     0  0
  5 11  2  0     0  0
  6 12  1  0     0  0
  7 13  1  0     0  0
  8 14  1  0     0  0
  8 15  2  0     0  0
  9 16  1  0     0  0
 10 17  2  0     0  0
 12 18  1  0     0  0
 16 19  2  0     0  0
 18 20  1  0     0  0
 18 21  2  0     0  0
  5  7  1  0     0  0
 17 19  1  0     0  0
M  END
>  <IDNUMBER>
BAS 02323351

>  <BOX>
2

>  <CELL>
H10

>  <WEIGHT>
10.0

>  <MOL_WEIGHT>
289.29

>  <STRUCT_FORMULA>
C15H15NO5

>  <VENDOR_LOT>
387376

$$$$

          08231011372D 1   1.00000     0.00000     0

 19 20  0     0  0            999 V2000
   -2.0483    0.0448    0.0000 C   0  0  3  0  0  0           0  0  0
   -2.0483    1.4069    0.0000 C   0  0  3  0  0  0           0  0  0
   -0.8483   -0.7276    0.0000 C   0  0  0  0  0  0           0  0  0
   -3.2793   -0.7276    0.0000 C   0  0  0  0  0  0           0  0  0
   -3.2793    2.1310    0.0000 C   0  0  0  0  0  0           0  0  0
   -0.8483    2.1552    0.0000 C   0  0  0  0  0  0           0  0  0
    0.3655   -0.0207    0.0000 N   0  0  0  0  0  0           0  0  0
   -0.8483   -2.1276    0.0000 O   0  0  0  0  0  0           0  0  0
   -4.5103    0.0448    0.0000 C   0  0  0  0  0  0           0  0  0
   -4.5103    1.4069    0.0000 C   0  0  0  0  0  0           0  0  0
    0.3655    1.4552    0.0000 O   0  0  0  0  0  0           0  0  0
   -0.8483    3.5552    0.0000 O   0  0  0  0  0  0           0  0  0
    1.6138   -0.7276    0.0000 C   0  0  0  0  0  0           0  0  0
    2.8414   -0.0207    0.0000 C   0  0  0  0  0  0           0  0  0
    1.6138   -2.1276    0.0000 C   0  0  0  0  0  0           0  0  0
    4.0655   -0.7276    0.0000 C   0  0  0  0  0  0           0  0  0
    2.8414   -2.8448    0.0000 C   0  0  0  0  0  0           0  0  0
    4.0655   -2.1276    0.0000 C   0  0  0  0  0  0           0  0  0
    5.2897   -0.0207    0.0000 O   0  0  0  0  0  0           0  0  0
  1  2  1  0     0  0
  1  3  1  0     0  0
  1  4  1  0     0  0
  2  5  1  0     0  0
  2  6  1  0     0  0
  3  7  1  0     0  0
  3  8  2  0     0  0
  4  9  1  0     0  0
  5 10  1  0     0  0
  6 11  1  0     0  0
  6 12  2  0     0  0
  7 13  1  0     0  0
 13 14  2  0     0  0
 13 15  1  0     0  0
 14 16  1  0     0  0
 15 17  2  0     0  0
 16 18  2  0     0  0
 16 19  1  0     0  0
  9 10  2  0     0  0
 17 18  1  0     0  0
M  END
>  <IDNUMBER>
BAS 00649102

>  <BOX>
2

>  <CELL>
H11

>  <WEIGHT>
10.0

>  <MOL_WEIGHT>
261.28

>  <STRUCT_FORMULA>
C14H15NO4

>  <VENDOR_LOT>
401602

$$$$

          08231011372D 1   1.00000     0.00000     0

 19 20  0     0  0            999 V2000
   -0.5241   -0.2552    0.0000 N   0  0  3  0  0  0           0  0  0
   -0.0379    0.4069    0.0000 C   0  0  0  0  0  0           0  0  0
   -0.2655   -1.0448    0.0000 C   0  0  0  0  0  0           0  0  0
   -1.3483   -0.2655    0.0000 C   0  0  0  0  0  0           0  0  0
    0.7897    0.3103    0.0000 C   0  0  0  0  0  0           0  0  0
   -0.3759    1.1483    0.0000 C   0  0  0  0  0  0           0  0  0
   -0.9379   -1.5414    0.0000 C   0  0  0  0  0  0           0  0  0
    0.5138   -1.3034    0.0000 C   0  0  0  0  0  0           0  0  0
   -1.6103   -1.0517    0.0000 C   0  0  0  0  0  0           0  0  0
   -1.8379    0.4069    0.0000 C   0  0  0  0  0  0           0  0  0
    1.2724    0.9793    0.0000 C   0  0  0  0  0  0           0  0  0
    0.1138    1.8103    0.0000 C   0  0  0  0  0  0           0  0  0
   -1.1862    1.2345    0.0000 C   0  0  0  0  0  0           0  0  0
   -0.9379   -2.3655    0.0000 C   0  0  0  0  0  0           0  0  0
    0.9379    1.7276    0.0000 C   0  0  0  0  0  0           0  0  0
    2.0897    0.8931    0.0000 C   0  0  0  0  0  0           0  0  0
   -1.6483   -2.7759    0.0000 O   0  0  0  0  0  0           0  0  0
    2.4241    0.1310    0.0000 O   0  0  0  0  0  0           0  0  0
    2.5759    1.5552    0.0000 O   0  0  0  0  0  0           0  0  0
  1  2  1  0     0  0
  1  3  1  0     0  0
  1  4  1  0     0  0
  2  5  2  0     0  0
  2  6  1  0     0  0
  3  7  2  0     0  0
  3  8  1  0     0  0
  4  9  2  0     0  0
  4 10  1  0     0  0
  5 11  1  0     0  0
  6 12  2  0     0  0
  6 13  1  0     0  0
  7 14  1  0     0  0
 11 15  2  0     0  0
 11 16  1  0     0  0
 14 17  2  0     0  0
 16 18  1  0     0  0
 16 19  2  0     0  0
  7  9  1  0     0  0
 12 15  1  0     0  0
M  END
>  <IDNUMBER>
BAS 02899630

>  <BOX>
2

>  <CELL>
H12

>  <WEIGHT>
10.0

>  <MOL_WEIGHT>
257.29

>  <STRUCT_FORMULA>
C15H15NO3

>  <VENDOR_LOT>
413233

$$$$

          08231011372D 1   1.00000     0.00000     0

 14 15  0     0  0            999 V2000
    0.2655   -0.9103    0.0000 C   0  0  0  0  0  0           0  0  0
    0.2655    0.7207    0.0000 C   0  0  0  0  0  0           0  0  0
    1.8172   -1.4103    0.0000 N   0  0  0  0  0  0           0  0  0
   -1.1345   -1.7172    0.0000 N   0  0  3  0  0  0           0  0  0
    1.8172    1.2207    0.0000 N   0  0  3  0  0  0           0  0  0
   -1.1345    1.5414    0.0000 C   0  0  0  0  0  0           0  0  0
    2.7586   -0.0793    0.0000 C   0  0  0  0  0  0           0  0  0
   -2.5552   -0.9103    0.0000 C   0  0  0  0  0  0           0  0  0
   -1.1345   -3.3448    0.0000 C   0  0  0  0  0  0           0  0  0
    2.3276    2.7828    0.0000 C   0  0  0  0  0  0           0  0  0
   -2.5552    0.7207    0.0000 N   0  0  0  0  0  0           0  0  0
   -1.1345    3.1793    0.0000 O   0  0  0  0  0  0           0  0  0
    4.3828   -0.0655    0.0000 S   0  0  0  0  0  0           0  0  0
   -3.9828   -1.7310    0.0000 O   0  0  0  0  0  0           0  0  0
  1  2  2  0     0  0
  1  3  1  0     0  0
  1  4  1  0     0  0
  2  5  1  0     0  0
  2  6  1  0     0  0
  3  7  2  0     0  0
  4  8  1  0     0  0
  4  9  1  0     0  0
[truncated: 632,924 more chars]
